# Supplementary material for: Intraocular dendritic cells characterize HLA-B27-associated acute anterior uveitis
Source: eLife. 2021 Nov 16;10:e67396. doi: 10.7554/eLife.67396 (PMC8594918; doi:10.7554/eLife.67396)
Supplement: Supplementary file 1. — (a) Clinical data and laboratory analysis. (b) Summary of technical information regarding library preparation and sequencing. (c) List of top DE genes per cluster in Figure 1—figure supplement 1Figure 1. (d) Absolute and relative cluster size in Figure 2. (e) List of DE genes per meta-cluster in Figure 3. (f) List of the DE genes per cluster in Figure 2. (g) GWAS risk genes per meta-cluster in Figure 3G. (h) AqH cytokine level in Figure 4. (i) Cytokine serum level in Figure 4—figure supplement 2. [file elife-67396-supp1.xlsx]

## Sheet: 1a
Supplementary File 1a: Clinical data and laboratory analysis
	Endophthalmitis (Control)			Anterior uveitis (AU); HLA-B27-				Acute anterior uveitis (AAU); HLA-B27+				p-value
Clinical data	Patient 1	Patient 2	Patient 3	Patient 1	Patient 2	Patient 3	Patient 4	Patient 1	Patient 2	Patient 3	Patient 4
Sex [M male, F female]	F	F	F	F	F	F	F	M	F	M	M	0.0551
HLA-B27 [0 negative, 1 positive]	0	0	n.d.	0	0	0	0	1	1	1	1	0.00951
ANA [0 negative, 1 positive]	n.d.	n.d.	n.d.	0	1	0	0	n.d.	0	0	n.d.	1.0001
Age [years]	76.2	92.1	79.5	18.3	71.7	63.4	23.9	33.6	21.4	20.4	46.2	0.0182
Active uveitis	1	1	1	1	1	1	1	1	1	1	1	1.0001
Spondyloarthritis	0	0	0	0	0	0	0	1	1	1	1
Systemic anti-inflammatory medication
	CsA	0	Pred	SSZ	0	0	0	0	Ada	0	Ada	0.7661
Topical corticosteroids	1	0	1	1	1	1	0	1	0	0	1	1.0001
Uveitis complications	n.a.	n.a.	n.a.	1	1	0	1	0	1	1	1	1.0003
Previous ocular surgery	1	1	0	0	0	1	0	0	0	0	0	0.2001
Uveitis duration in years	n.a.	n.a.	n.a.	2	0.75	12	0.08	n.d.	7.2	0.08	5.5	0.88893
Laboratory analysis
Flow cytometry	1	0	0	1	0	0	0	0	1	1	1
scRNA-seq	1	0	0	1	1	0	0	1	1	1	1
Luminex	1	1	1	1	0	1	1	1	1	1	1
n.a., not applicable; n.d., not determined; 0= no; 1= yes; Pred, prednisolone; SSZ, sulfasalazine;
Ada, adalimumab; CsA, cyclosporine A.
1Fisher´s exact test.
2One way-ANOVA, post-Hoc Tukey HSD.
3t-Test.

## Sheet: 1b
Supplementary File 1b: Summary of technical information regarding libraries preparation and sequencing
Sample	Chromium Single Cell 3' Library kit version	Estimated number of cells	Number of cells after filtering	Mean reads per cell	Median genes per cell	Sequencing Saturation
Control 1	v2	600	580	48311	993	74.6%
B27- AU 1	v2	1780	1724	45647	1080	85.1%
B27- AU 2	v2	750	733	299337	1416	94.9%
B27+ AAU 1	v2	4000	3976	29272	551	78.4%
B27+ AAU 2	v2	3400	3357	66161	974	87.6%
B27+ AAU 3	v2	520	500	86529	573	96.2%
B27+ AAU 4	v3	2500	1435	87983	220	97.0%
total		13550	12305
average		1935.71	1757.86	94748.6	829.571
standard deviation		1410.81	1390.6	92773.6	401.91
standard error of the means		533.237	525.599	35065.1	151.908

## Sheet: 1c
Supplementary File 1c: List of top DE genes per cluster in Figure 1
Gene.ID	p.value	Avg_logFC	Pct.1	Pct.2	p_val_adj	Cluster.ID
AC092069.1	0	1.77009	0.664	0.069	0	cDCa
FGD2	0	1.64961	0.716	0.088	0	cDCa
ITGAX	0	1.58108	0.532	0.054	0	cDCa
MT-ATP8	0	1.48498	0.658	0.08	0	cDCa
KCNJ2	0	1.18243	0.442	0.034	0	cDCa
INSR	3.24671e-305	0.786212	0.385	0.034	5.67071e-301	cDCa
AC020656.1	3.91445e-295	2.65494	0.758	0.195	6.83698e-291	cDCa
DOCK5	3.83856e-264	0.804612	0.449	0.059	6.70443e-260	cDCa
B4GALT1	2.30509e-261	1.2854	0.748	0.198	4.02607e-257	cDCa
CTNNB1	3.64085e-260	1.27097	0.733	0.192	6.3591e-256	cDCa
GOLIM4	3.75055e-247	0.733695	0.397	0.047	6.55071e-243	cDCa
STAT2	6.97411e-226	1.14089	0.6	0.137	1.2181e-221	cDCa
C1orf56	2.71731e-205	1.19158	0.805	0.286	4.74606e-201	cDCa
CLEC7A	1.82787e-204	1.36712	0.697	0.227	3.19256e-200	cDCa
RASSF3	5.26034e-204	0.908951	0.59	0.137	9.1877e-200	cDCa
TP53	2.95576e-198	0.698644	0.438	0.073	5.16254e-194	cDCa
CDC42SE1	1.01184e-187	1.1577	0.791	0.305	1.76727e-183	cDCa
CBX6	1.28806e-187	1.18657	0.568	0.143	2.24972e-183	cDCa
MDM4	1.17645e-183	0.959188	0.675	0.212	2.05479e-179	cDCa
HNRNPH1	7.57551e-179	1.29529	0.791	0.323	1.32314e-174	cDCa
BEST1	4.37531e-178	0.545568	0.335	0.046	7.64192e-174	cDCa
PPP1CB	2.04394e-172	1.22356	0.748	0.309	3.56995e-168	cDCa
CALR	2.88133e-172	1.82048	0.724	0.314	5.03253e-168	cDCa
CDC42	3.24637e-170	1.7181	0.85	0.496	5.67011e-166	cDCa
BCAS4	3.1976e-169	0.492878	0.314	0.042	5.58493e-165	cDCa
AC106707.1	1.19388e-156	0.414663	0.284	0.036	2.08524e-152	cDCa
SET	2.6835e-156	1.09573	0.765	0.357	4.68699e-152	cDCa
CHP1	4.53572e-156	0.827926	0.538	0.148	7.92209e-152	cDCa
YWHAE	2.07596e-152	1.0316	0.65	0.244	3.62587e-148	cDCa
CAPZA1	1.07209e-150	1.09482	0.789	0.403	1.87251e-146	cDCa
PHKG1	9.77695e-150	0.468846	0.352	0.059	1.70764e-145	cDCa
LYZ	8.75029e-149	2.08725	0.776	0.42	1.52833e-144	cDCa
WASF2	2.55945e-146	0.995006	0.643	0.243	4.47033e-142	cDCa
ARPC4	1.08987e-143	1.16587	0.675	0.294	1.90357e-139	cDCa
PTEN	2.66722e-140	0.80508	0.479	0.129	4.65857e-136	cDCa
BCL10	3.5267e-140	0.592321	0.387	0.079	6.15974e-136	cDCa
RAP2B	1.67767e-130	0.740757	0.496	0.143	2.93022e-126	cDCa
RIN2	1.51373e-128	0.723741	0.333	0.064	2.64389e-124	cDCa
RETREG2	1.25095e-126	0.57734	0.37	0.079	2.18491e-122	cDCa
IRF2BPL	1.46206e-126	0.601812	0.361	0.076	2.55364e-122	cDCa
HLA-DRB5	1.39892e-119	0.463768	0.289	0.05	2.44335e-115	cDCa
WTAP	2.20408e-116	0.708129	0.558	0.202	3.84964e-112	cDCa
GNAI2	3.68638e-115	0.961273	0.622	0.277	6.43863e-111	cDCa
RBM6	1.24436e-114	0.647308	0.496	0.158	2.1734e-110	cDCa
C2orf68	1.40805e-110	0.526756	0.359	0.084	2.4593e-106	cDCa
ADAM17	2.94942e-109	0.545406	0.378	0.094	5.15146e-105	cDCa
ARGLU1	3.35304e-109	0.779335	0.647	0.29	5.85642e-105	cDCa
EIF2S3	4.03875e-108	0.753556	0.553	0.21	7.05408e-104	cDCa
IFNGR2	2.04658e-107	0.76207	0.524	0.189	3.57456e-103	cDCa
TOR1AIP2	1.45502e-104	0.534368	0.383	0.1	2.54133e-100	cDCa
SLC35F6	5.93265e-104	0.554409	0.333	0.076	1.0362e-99	cDCa
EIF5A	1.69264e-103	0.931888	0.607	0.28	2.95636e-99	cDCa
RREB1	2.717e-100	0.462048	0.305	0.066	4.74552e-96	cDCa
APOL2	2.88077e-100	0.56572	0.376	0.099	5.03155e-96	cDCa
R3HDM2	3.48635e-100	0.468927	0.31	0.067	6.08925e-96	cDCa
ZC3H4	3.32767e-99	0.44006	0.327	0.074	5.8121e-95	cDCa
METTL7A	9.04639e-98	0.54479	0.336	0.084	1.58004e-93	cDCa
SERPINB9	4.68008e-97	0.922188	0.457	0.152	8.17422e-93	cDCa
C6orf62	6.15337e-97	0.795098	0.551	0.232	1.07475e-92	cDCa
MSR1	1.77509e-95	1.25216	0.357	0.098	3.10037e-91	cDCa
GIGYF1	1.37109e-91	0.500825	0.306	0.07	2.39474e-87	cDCa
AC005921.2	7.10179e-90	0.414647	0.276	0.059	1.2404e-85	cDCa
CTBP1	1.70145e-88	0.573487	0.427	0.141	2.97176e-84	cDCa
DCUN1D1	6.51957e-87	0.481542	0.289	0.067	1.13871e-82	cDCa
TRA2A	8.07291e-86	0.562338	0.466	0.17	1.41001e-81	cDCa
STK17B	6.8569e-84	0.82918	0.626	0.339	1.19763e-79	cDCa
AHR	9.83595e-83	0.560299	0.316	0.085	1.71795e-78	cDCa
CD74	2.7742e-82	0.938216	0.825	0.584	4.84542e-78	cDCa
DHRS3	2.43183e-80	0.627248	0.346	0.101	4.24743e-76	cDCa
LSM12	6.68487e-80	0.497882	0.331	0.092	1.16758e-75	cDCa
JAK3	5.57015e-77	0.509625	0.365	0.113	9.72883e-73	cDCa
SEC22B	1.55288e-76	0.495368	0.372	0.117	2.71225e-72	cDCa
VMP1	2.25971e-76	0.810382	0.611	0.343	3.9468e-72	cDCa
SUSD6	2.2754e-76	0.485772	0.271	0.066	3.97422e-72	cDCa
RSRC1	5.05422e-76	0.424348	0.312	0.086	8.82769e-72	cDCa
THAP5	2.83198e-74	0.379209	0.289	0.074	4.94633e-70	cDCa
MT-ATP6	1.2135e-73	0.976198	0.968	0.968	2.1195e-69	cDCa
RNF144B	4.80627e-72	0.534243	0.291	0.08	8.39463e-68	cDCa
EXOSC6	5.65791e-72	0.355687	0.261	0.063	9.88211e-68	cDCa
MARCKS	3.40582e-70	1.09763	0.43	0.174	5.9486e-66	cDCa
AL133453.1	3.09509e-67	0.464326	0.342	0.111	5.40588e-63	cDCa
ETV6	3.2947e-67	0.443074	0.289	0.083	5.75452e-63	cDCa
YBX1	6.33929e-67	0.778808	0.716	0.542	1.10722e-62	cDCa
ZNF652	7.56801e-66	0.426376	0.286	0.08	1.32183e-61	cDCa
SRSF6	1.94295e-64	0.460284	0.352	0.121	3.39355e-60	cDCa
PCMTD1	4.60916e-62	0.407469	0.297	0.09	8.05037e-58	cDCa
NAIP	4.08056e-60	0.500712	0.327	0.115	7.12711e-56	cDCa
THRAP3	8.16322e-60	0.631761	0.442	0.2	1.42579e-55	cDCa
TRIM38	4.29399e-58	0.499279	0.367	0.144	7.49988e-54	cDCa
PPP3CA	8.97247e-57	0.479235	0.342	0.125	1.56713e-52	cDCa
APOBEC3C	1.9971e-56	0.452016	0.462	0.208	3.48813e-52	cDCa
SFT2D2	5.92114e-54	0.418092	0.31	0.109	1.03419e-49	cDCa
BROX	2.69284e-53	0.468181	0.312	0.112	4.70332e-49	cDCa
IAH1	3.6374e-52	0.460271	0.378	0.161	6.35308e-48	cDCa
SAR1A	3.88347e-52	0.526021	0.408	0.181	6.78288e-48	cDCa
ACTB	6.15606e-52	0.552262	0.991	0.972	1.07522e-47	cDCa
SUMF2	7.04746e-52	0.354295	0.303	0.105	1.23091e-47	cDCa
CNOT9	2.22724e-50	0.369478	0.254	0.078	3.89009e-46	cDCa
LIMS1	2.31164e-47	0.541375	0.479	0.268	4.03751e-43	cDCa
EDEM1	2.07549e-45	0.376546	0.256	0.086	3.62505e-41	cDCa
TMED4	7.35086e-45	0.372608	0.32	0.125	1.2839e-40	cDCa
YWHAZ	2.12248e-44	0.621651	0.583	0.415	3.70712e-40	cDCa
TSPYL1	1.57711e-42	0.416554	0.306	0.122	2.75458e-38	cDCa
SPOP	2.50452e-37	0.337187	0.258	0.099	4.37439e-33	cDCa
NDUFV3	5.98351e-36	0.34234	0.273	0.112	1.04508e-31	cDCa
RNF149	3.00956e-35	0.432673	0.378	0.199	5.25649e-31	cDCa
PHACTR2	3.78423e-35	0.380645	0.254	0.101	6.60954e-31	cDCa
WSB1	1.37183e-34	0.645527	0.474	0.308	2.39604e-30	cDCa
TPM4	1.75964e-33	0.541349	0.438	0.272	3.07339e-29	cDCa
PLAC8	1.15158e-32	0.66922	0.404	0.229	2.01134e-28	cDCa
SAMHD1	2.90328e-32	0.510785	0.421	0.262	5.07086e-28	cDCa
CSNK1A1	3.40023e-32	0.481833	0.391	0.225	5.93883e-28	cDCa
NUCKS1	2.29666e-31	0.439459	0.408	0.244	4.01135e-27	cDCa
DNAJC3	3.42018e-29	0.33251	0.288	0.137	5.9737e-25	cDCa
CEBPD	5.53897e-29	0.405077	0.338	0.176	9.67436e-25	cDCa
TOB1	1.73881e-28	0.268591	0.316	0.152	3.03701e-24	cDCa
PIP4K2A	6.04494e-28	0.410006	0.346	0.187	1.05581e-23	cDCa
TBL1XR1	1.99005e-27	0.346645	0.303	0.15	3.47583e-23	cDCa
MOB1A	3.89985e-27	0.447803	0.402	0.254	6.81147e-23	cDCa
AP1S2	5.08144e-26	0.523104	0.389	0.244	8.87524e-22	cDCa
THBS1	3.95597e-24	1.00582	0.306	0.166	6.9095e-20	cDCa
TXN2	6.23618e-24	0.309361	0.271	0.139	1.08921e-19	cDCa
NABP1	1.3726e-23	0.314224	0.282	0.146	2.39739e-19	cDCa
CTSS	3.51618e-23	0.445983	0.485	0.345	6.14137e-19	cDCa
CTSB	4.72616e-23	0.45169	0.468	0.311	8.25471e-19	cDCa
H3F3A	9.43383e-23	0.324543	0.953	0.85	1.64771e-18	cDCa
FAM120A	9.57878e-23	0.297592	0.288	0.153	1.67303e-18	cDCa
HLA-E	1.90192e-20	0.355476	0.739	0.67	3.32189e-16	cDCa
ERO1A	2.43657e-20	0.367172	0.335	0.205	4.25572e-16	cDCa
HLA-DPA1	1.14448e-19	0.373253	0.509	0.37	1.99895e-15	cDCa
SSR3	6.11634e-18	0.366591	0.352	0.239	1.06828e-13	cDCa
ARF6	1.09542e-17	0.434414	0.429	0.335	1.91326e-13	cDCa
NEAT1	7.9689e-16	0.268555	0.925	0.802	1.39185e-11	cDCa
PSMA3-AS1	2.9237e-15	0.263691	0.28	0.172	5.10653e-11	cDCa
HLA-DRB1	9.09359e-14	0.366645	0.504	0.409	1.58829e-09	cDCa
PARP14	1.42555e-13	0.3247	0.31	0.215	2.48986e-09	cDCa
CYBB	5.32262e-13	0.391559	0.31	0.212	9.29648e-09	cDCa
ACTR2	1.12862e-12	0.360088	0.421	0.348	1.97125e-08	cDCa
APOL6	1.13624e-11	0.31864	0.297	0.211	1.98456e-07	cDCa
PRRC2C	2.00514e-11	0.28837	0.335	0.255	3.50218e-07	cDCa
ITM2B	1.97297e-10	0.333419	0.568	0.561	3.44598e-06	cDCa
TNRC6B	2.96078e-10	0.296593	0.346	0.271	5.17129e-06	cDCa
SP110	1.66198e-09	0.292196	0.297	0.224	2.90281e-05	cDCa
PPP2R5C	3.03228e-09	0.257418	0.374	0.304	5.29618e-05	cDCa
CST3	8.79759e-09	0.374778	0.494	0.391	0.000153659	cDCa
ZEB2	2.38677e-08	0.26984	0.28	0.209	0.000416873	cDCa
ITGB2	3.40462e-08	0.32687	0.308	0.25	0.000594651	cDCa
CDC42SE2	4.18872e-07	0.296151	0.353	0.312	0.00731602	cDCa
TAPBP	1.13078e-06	0.272887	0.301	0.253	0.0197501	cDCa
C1QA	0	1.1164	0.491	0.026	0	cDCb
C1QB	0	1.08236	0.503	0.017	0	cDCb
HLA-DQA1	0	0.977965	0.632	0.122	0	cDCb
C1QC	0	0.757731	0.413	0.01	0	cDCb
HLA-DPB1	4.31611e-300	1.46446	0.898	0.4	7.53852e-296	cDCb
HLA-DPA1	1.33325e-295	1.28559	0.864	0.344	2.32865e-291	cDCb
CD74	7.02497e-282	1.2502	0.983	0.568	1.22698e-277	cDCb
HLA-DRA	6.12563e-279	1.26234	0.99	0.486	1.0699e-274	cDCb
CST3	2.15627e-276	1.11033	0.9	0.362	3.76615e-272	cDCb
CLEC10A	2.95675e-259	0.422042	0.339	0.041	5.16426e-255	cDCb
HLA-DQB1	3.89616e-197	0.786948	0.632	0.204	6.80504e-193	cDCb
HLA-DRB1	3.01595e-188	0.931305	0.848	0.384	5.26765e-184	cDCb
MS4A6A	3.3413e-187	0.564338	0.558	0.154	5.83592e-183	cDCb
IFITM3	1.08297e-184	0.784151	0.705	0.252	1.89152e-180	cDCb
LYZ	1.47381e-169	1.14519	0.892	0.405	2.57416e-165	cDCb
MRC1	9.14847e-159	0.308907	0.306	0.054	1.59787e-154	cDCb
NPC2	2.15343e-157	0.682899	0.85	0.399	3.76118e-153	cDCb
HLA-DMA	2.13511e-147	0.467806	0.538	0.174	3.72919e-143	cDCb
TUBA1B	5.22279e-144	0.772135	0.734	0.37	9.12213e-140	cDCb
TYROBP	3.58803e-143	0.609412	0.938	0.43	6.26686e-139	cDCb
FCER1G	1.2102e-134	0.511116	0.89	0.393	2.11374e-130	cDCb
FTL	4.21143e-125	0.869871	0.999	0.93	7.35568e-121	cDCb
RNASE6	5.82573e-125	0.395163	0.43	0.125	1.01752e-120	cDCb
HLA-DMB	2.21242e-123	0.335287	0.382	0.102	3.86421e-119	cDCb
SAT1	1.98276e-122	0.49662	0.962	0.564	3.46309e-118	cDCb
AIF1	6.09693e-122	0.51829	0.801	0.361	1.06489e-117	cDCb
LST1	8.47719e-120	0.521141	0.693	0.305	1.48063e-115	cDCb
MARCH1	7.5165e-112	0.339508	0.514	0.178	1.31283e-107	cDCb
CLEC7A	3.27685e-108	0.556698	0.583	0.225	5.72334e-104	cDCb
MNDA	1.87354e-106	0.350265	0.578	0.214	3.27233e-102	cDCb
AC020656.1	1.30652e-105	1.11541	0.522	0.199	2.28198e-101	cDCb
RAB31	1.08986e-101	0.332081	0.473	0.165	1.90354e-97	cDCb
CD163	9.66134e-101	0.452151	0.565	0.223	1.68745e-96	cDCb
MEF2C	1.47844e-99	0.303931	0.396	0.124	2.58224e-95	cDCb
FGL2	3.3477e-92	0.30554	0.473	0.169	5.84709e-88	cDCb
C1orf162	4.35775e-91	0.366899	0.576	0.24	7.61125e-87	cDCb
MARCKS	8.66419e-90	0.593654	0.455	0.167	1.51329e-85	cDCb
ATF5	7.38692e-82	0.268073	0.394	0.135	1.2902e-77	cDCb
FCGR3A	9.96441e-80	0.372451	0.372	0.131	1.74038e-75	cDCb
VSIG4	9.98242e-79	0.266623	0.294	0.087	1.74353e-74	cDCb
VAMP5	4.78366e-77	0.472165	0.725	0.419	8.35515e-73	cDCb
LY96	5.50419e-77	0.318069	0.465	0.192	9.61363e-73	cDCb
CSTA	2.53259e-76	0.301404	0.461	0.183	4.42342e-72	cDCb
FCGR1A	2.6987e-76	0.250914	0.358	0.121	4.71355e-72	cDCb
CTSS	6.33355e-76	0.401311	0.65	0.331	1.10622e-71	cDCb
TMSB10	2.08639e-75	0.652261	0.999	0.999	3.64409e-71	cDCb
MSR1	2.10984e-75	0.360839	0.308	0.096	3.68505e-71	cDCb
LGALS2	1.82703e-73	0.287874	0.259	0.073	3.1911e-69	cDCb
CTSB	2.63265e-72	0.393606	0.606	0.299	4.59819e-68	cDCb
OAZ1	2.73915e-72	0.377732	0.984	0.823	4.7842e-68	cDCb
FTH1	6.55306e-72	0.260066	1	0.975	1.14456e-67	cDCb
DPYSL2	5.65795e-71	0.278242	0.299	0.096	9.88218e-67	cDCb
AP1S2	4.08264e-70	0.339194	0.514	0.233	7.13073e-66	cDCb
TNFSF13B	7.16424e-69	0.287076	0.56	0.252	1.25131e-64	cDCb
FGD2	7.78046e-69	0.276997	0.313	0.102	1.35893e-64	cDCb
GRN	2.54107e-67	0.273686	0.385	0.149	4.43823e-63	cDCb
GLUL	3.24722e-62	0.445446	0.544	0.269	5.6716e-58	cDCb
KCTD12	1.99975e-61	0.254001	0.446	0.189	3.49276e-57	cDCb
VAMP8	2.06872e-61	0.353467	0.719	0.459	3.61323e-57	cDCb
ZEB2	6.04058e-61	0.263703	0.452	0.196	1.05505e-56	cDCb
CYBB	2.13941e-59	0.262618	0.456	0.2	3.7367e-55	cDCb
NAIP	4.00316e-58	0.251343	0.306	0.112	6.99191e-54	cDCb
LAP3	4.14796e-58	0.263097	0.455	0.204	7.24482e-54	cDCb
MT2A	7.15759e-57	0.352492	0.828	0.557	1.25014e-52	cDCb
IFNGR2	8.71357e-56	0.374834	0.421	0.189	1.52191e-51	cDCb
WSB1	4.45666e-55	0.300159	0.565	0.299	7.78401e-51	cDCb
PSAP	1.08014e-50	0.313003	0.557	0.295	1.88656e-46	cDCb
NEAT1	4.44111e-49	0.333048	0.955	0.797	7.75685e-45	cDCb
MAFB	5.40746e-49	0.284285	0.418	0.192	9.44467e-45	cDCb
TYMP	2.32376e-48	0.329044	0.526	0.279	4.05867e-44	cDCb
VMP1	3.47072e-48	0.349406	0.591	0.339	6.06196e-44	cDCb
SERF2	3.00465e-46	0.265817	0.996	0.949	5.24792e-42	cDCb
RNASET2	1.10016e-43	0.262399	0.508	0.284	1.92154e-39	cDCb
GNAI2	4.86159e-42	0.265986	0.505	0.278	8.49126e-38	cDCb
STAT2	3.77667e-41	0.384277	0.321	0.146	6.59634e-37	cDCb
GPX4	4.60838e-41	0.267886	0.565	0.349	8.049e-37	cDCb
ITGB2	1.71111e-39	0.269233	0.44	0.24	2.98863e-35	cDCb
WASF2	1.95291e-38	0.465344	0.443	0.248	3.41095e-34	cDCb
YBX1	8.8648e-38	0.310783	0.755	0.535	1.54833e-33	cDCb
CBX6	1.71828e-36	0.420306	0.316	0.151	3.00114e-32	cDCb
VIM	9.93015e-33	0.273631	0.891	0.709	1.7344e-28	cDCb
ARPC1B	2.23841e-32	0.274019	0.646	0.467	3.90961e-28	cDCb
COTL1	3.86011e-32	0.269095	0.528	0.33	6.74207e-28	cDCb
SNX3	1.06636e-28	0.268318	0.554	0.373	1.8625e-24	cDCb
PTEN	2.74387e-28	0.264216	0.276	0.135	4.79244e-24	cDCb
YWHAE	1.36091e-27	0.385639	0.415	0.251	2.37696e-23	cDCb
CHP1	2.77623e-27	0.288611	0.298	0.156	4.84896e-23	cDCb
CDC42	1.46977e-26	0.710314	0.652	0.502	2.5671e-22	cDCb
B4GALT1	1.40037e-25	0.397058	0.361	0.213	2.44588e-21	cDCb
CAPZA1	3.37103e-24	0.430775	0.571	0.41	5.88785e-20	cDCb
ATP5F1E	1.15541e-22	0.253332	0.992	0.98	2.01804e-18	cDCb
RAP2B	1.25512e-22	0.25308	0.277	0.15	2.19219e-18	cDCb
PPP1CB	1.68465e-22	0.47126	0.462	0.319	2.94242e-18	cDCb
ITM2B	4.93131e-22	0.259749	0.71	0.551	8.61303e-18	cDCb
PPA1	4.64943e-19	0.256146	0.372	0.25	8.12069e-15	cDCb
MT-ATP6	5.72808e-10	0.324	0.968	0.968	1.00047e-05	cDCb
JCHAIN	0	2.17857	0.936	0.017	0	pDC
BCL11A	0	1.84574	0.957	0.026	0	pDC
TSPAN13	0	0.79828	0.553	0.004	0	pDC
LILRA4	0	0.740495	0.511	0.004	0	pDC
TCL1A	0	0.6267	0.255	0	0	pDC
SCT	0	0.480504	0.362	0	0	pDC
SCAMP5	0	0.291764	0.255	0.001	0	pDC
CLEC4C	0	0.2604	0.255	0	0	pDC
AC119428.2	9.7176e-241	0.3369	0.298	0.003	1.69728e-236	pDC
SMPD3	1.66899e-239	0.351124	0.319	0.003	2.91507e-235	pDC
PTGDS	2.54786e-237	1.36549	0.34	0.004	4.45009e-233	pDC
DERL3	3.52806e-227	0.415968	0.404	0.006	6.16211e-223	pDC
FAM129C	7.05972e-220	0.435185	0.362	0.005	1.23305e-215	pDC
SERPINF1	1.15503e-216	0.845045	0.553	0.012	2.01738e-212	pDC
IL3RA	1.64602e-207	0.336574	0.277	0.003	2.87493e-203	pDC
MAP1A	5.81118e-181	0.365289	0.298	0.004	1.01498e-176	pDC
PFKFB2	1.97207e-172	0.671337	0.426	0.009	3.44442e-168	pDC
PLD4	6.79206e-172	0.319032	0.298	0.004	1.1863e-167	pDC
TCF4	5.50583e-168	1.20793	0.809	0.037	9.61649e-164	pDC
UGCG	9.66974e-157	1.38517	0.894	0.05	1.68892e-152	pDC
PPP1R14A	9.30412e-151	0.690438	0.34	0.006	1.62506e-146	pDC
LINC00996	1.12924e-149	0.548284	0.34	0.007	1.97234e-145	pDC
NOTCH4	1.09522e-132	0.304258	0.255	0.004	1.91291e-128	pDC
LAMP5	2.19065e-116	0.347796	0.298	0.007	3.82618e-112	pDC
SPIB	3.06508e-114	0.439982	0.383	0.011	5.35348e-110	pDC
MZB1	1.59725e-92	0.572113	0.447	0.02	2.78976e-88	pDC
PHACTR1	3.33268e-68	0.907826	0.553	0.042	5.82086e-64	pDC
RUNX2	1.60595e-67	0.621064	0.574	0.045	2.80496e-63	pDC
GNG7	2.10044e-67	0.282598	0.277	0.01	3.66862e-63	pDC
IGKC	4.70971e-62	0.458991	0.553	0.046	8.22598e-58	pDC
SOX4	5.37968e-61	0.773336	0.468	0.033	9.39615e-57	pDC
PAN2	1.86338e-59	0.97482	0.383	0.023	3.25458e-55	pDC
CLN8	3.42489e-59	0.875987	0.553	0.049	5.98192e-55	pDC
GZMB	3.76055e-57	1.50387	0.723	0.09	6.56818e-53	pDC
GAS6	1.11101e-52	0.29633	0.255	0.011	1.9405e-48	pDC
CCDC50	9.69389e-52	0.557601	0.553	0.055	1.69313e-47	pDC
PLAC8	1.32092e-49	1.95962	1	0.233	2.30712e-45	pDC
IRF8	6.38414e-47	0.769306	0.489	0.048	1.11505e-42	pDC
CXXC5	7.19008e-43	0.58507	0.362	0.028	1.25582e-38	pDC
IRF4	2.51901e-42	0.349329	0.277	0.016	4.3997e-38	pDC
SEL1L3	5.42764e-42	0.557216	0.468	0.047	9.47991e-38	pDC
IRF7	8.7949e-37	0.994479	0.702	0.134	1.53612e-32	pDC
CNP	3.70147e-29	0.457759	0.404	0.049	6.46499e-25	pDC
APP	6.48754e-28	0.370594	0.404	0.051	1.13311e-23	pDC
CLIC3	1.30999e-25	0.54583	0.447	0.067	2.28803e-21	pDC
PPP1R14B	1.80178e-24	0.569534	0.404	0.059	3.14699e-20	pDC
CYB561A3	3.98897e-24	0.274018	0.298	0.033	6.96714e-20	pDC
INSR	8.25987e-24	0.678699	0.362	0.048	1.44267e-19	pDC
OGT	2.00735e-23	0.764641	0.596	0.125	3.50603e-19	pDC
FMNL3	2.04592e-23	0.330789	0.277	0.029	3.5734e-19	pDC
LRRK1	2.71324e-23	0.32609	0.277	0.029	4.73895e-19	pDC
IDH3A	5.01967e-23	0.293391	0.277	0.03	8.76736e-19	pDC
CERS6	2.16691e-22	0.322191	0.34	0.045	3.78473e-18	pDC
LILRB4	4.46261e-22	0.44852	0.404	0.064	7.79439e-18	pDC
SMIM14	4.54535e-22	0.483349	0.426	0.07	7.93891e-18	pDC
ITM2C	1.44787e-21	0.42627	0.404	0.063	2.52885e-17	pDC
CYSLTR1	2.31391e-21	0.304002	0.277	0.032	4.04148e-17	pDC
B4GALT1	6.48821e-21	1.82193	0.723	0.22	1.13323e-16	pDC
CBX6	7.66204e-21	0.931852	0.638	0.159	1.33825e-16	pDC
MAPKAPK2	2.41703e-18	0.363291	0.362	0.061	4.22158e-14	pDC
VEGFB	2.72329e-18	0.33024	0.277	0.037	4.75649e-14	pDC
TMEM263	2.02239e-17	0.296394	0.255	0.033	3.53231e-13	pDC
HERPUD1	2.9692e-17	0.835451	0.66	0.231	5.186e-13	pDC
PLEK	1.37778e-16	0.516631	0.468	0.107	2.40643e-12	pDC
GAPT	2.90671e-15	0.283042	0.298	0.049	5.07686e-11	pDC
ATG101	2.08423e-14	0.279174	0.277	0.045	3.64032e-10	pDC
ARID1B	5.10755e-14	0.393642	0.489	0.13	8.92085e-10	pDC
CD74	5.4469e-14	0.764477	0.979	0.593	9.51355e-10	pDC
C12orf75	1.03538e-13	0.630231	0.532	0.16	1.8084e-09	pDC
CXCR3	1.28648e-13	0.488313	0.383	0.087	2.24696e-09	pDC
FGD2	1.64581e-13	0.78145	0.447	0.114	2.87457e-09	pDC
ZNF652	1.94127e-13	0.544243	0.383	0.088	3.39062e-09	pDC
IRF2BPL	2.04632e-13	0.597546	0.383	0.087	3.5741e-09	pDC
PPM1K	6.86836e-13	0.388628	0.447	0.119	1.19963e-08	pDC
MDM4	8.05759e-13	1.12664	0.617	0.231	1.40734e-08	pDC
DCK	1.06746e-12	0.359192	0.447	0.118	1.86443e-08	pDC
GPM6B	1.1418e-12	0.261645	0.255	0.044	1.99427e-08	pDC
ALOX5AP	1.31821e-12	0.749691	0.723	0.327	2.30238e-08	pDC
RRBP1	2.49717e-12	0.379691	0.426	0.113	4.36156e-08	pDC
CORO1C	4.33873e-12	0.276586	0.298	0.06	7.57802e-08	pDC
ABI2	4.80629e-12	0.2542	0.255	0.046	8.39467e-08	pDC
ARID2	5.68444e-12	0.520206	0.319	0.069	9.92845e-08	pDC
SELENOS	2.47707e-11	0.419087	0.489	0.158	4.32646e-07	pDC
CCDC186	2.86516e-11	0.324868	0.34	0.079	5.00429e-07	pDC
SRP14	2.99549e-11	0.581062	0.979	0.686	5.23192e-07	pDC
SFT2D2	3.2859e-11	0.329154	0.426	0.117	5.73916e-07	pDC
ELMSAN1	3.84056e-11	0.459905	0.298	0.065	6.70792e-07	pDC
MED13L	5.20889e-11	0.318208	0.277	0.057	9.09784e-07	pDC
ADAM19	6.25258e-11	0.639979	0.383	0.102	1.09208e-06	pDC
CTBP1	2.04934e-10	0.507652	0.468	0.152	3.57938e-06	pDC
SULF2	2.75631e-10	0.295175	0.298	0.068	4.81417e-06	pDC
PARVB	3.19266e-10	0.430124	0.255	0.054	5.5763e-06	pDC
UBE2J1	5.73527e-10	0.344936	0.383	0.109	1.00172e-05	pDC
SLC20A1	5.75485e-10	0.277702	0.298	0.07	1.00514e-05	pDC
CCDC88A	5.92517e-10	0.358924	0.404	0.124	1.03489e-05	pDC
DPYSL2	1.06832e-09	0.312493	0.383	0.108	1.86593e-05	pDC
RAP1GDS1	2.55236e-09	0.39395	0.298	0.074	4.45796e-05	pDC
PLP2	3.81954e-09	0.455363	0.574	0.23	6.67121e-05	pDC
HNRNPH1	9.05776e-09	1.27302	0.66	0.342	0.000158203	pDC
STMN1	1.14726e-08	0.293201	0.255	0.059	0.000200381	pDC
PDIA4	1.32376e-08	0.335166	0.362	0.111	0.000231209	pDC
RBM6	1.70249e-08	0.716959	0.447	0.172	0.000297357	pDC
SH3KBP1	1.92595e-08	0.47517	0.447	0.168	0.000336387	pDC
CD4	2.28504e-08	0.261059	0.34	0.1	0.000399105	pDC
APEX1	2.42013e-08	0.280429	0.362	0.112	0.0004227	pDC
USF2	4.14905e-08	0.33587	0.298	0.083	0.000724674	pDC
PHB	5.04937e-08	0.320269	0.34	0.105	0.000881924	pDC
CHD9	7.24332e-08	0.310341	0.34	0.109	0.00126512	pDC
DNAJC3	8.21079e-08	0.357124	0.404	0.142	0.0014341	pDC
BAG1	1.24783e-07	0.352035	0.34	0.108	0.00217946	pDC
MT-ATP8	1.28861e-07	0.571826	0.34	0.104	0.00225069	pDC
MEF2C	1.48093e-07	0.299652	0.404	0.14	0.00258658	pDC
AC058791.1	1.74935e-07	0.508465	0.34	0.113	0.00305542	pDC
SELL	2.83897e-07	0.29665	0.426	0.159	0.00495854	pDC
TRA2A	3.27497e-07	0.457331	0.447	0.182	0.00572006	pDC
SMU1	3.51179e-07	0.324828	0.255	0.071	0.0061337	pDC
SRGAP2	4.5647e-07	0.367346	0.255	0.071	0.00797271	pDC
SUMF2	4.89177e-07	0.310664	0.34	0.113	0.00854397	pDC
ARGLU1	4.91984e-07	0.686748	0.596	0.305	0.00859299	pDC
CLTC	5.22304e-07	0.271462	0.362	0.124	0.00912255	pDC
XIAP	6.04277e-07	0.369965	0.34	0.116	0.0105543	pDC
PCMTD1	1.10435e-06	0.473841	0.298	0.099	0.0192886	pDC
SSR3	1.16713e-06	0.436188	0.511	0.243	0.0203852	pDC
SET	2.64434e-06	0.654895	0.638	0.374	0.0461861	pDC
CCL19	0	1.46361	0.754	0.001	0	matDC
CCL17	0	1.05277	0.393	0	0	matDC
LAMP3	0	0.852995	0.689	0.006	0	matDC
FSCN1	0	0.743806	0.574	0.005	0	matDC
UBD	0	0.740585	0.311	0.001	0	matDC
LAD1	0	0.410751	0.361	0	0	matDC
LINC01857	0	0.409282	0.393	0.001	0	matDC
SLCO5A1	0	0.341352	0.377	0.002	0	matDC
LIMCH1	0	0.331287	0.295	0	0	matDC
CD200	0	0.307395	0.295	0.001	0	matDC
TVP23A	0	0.292502	0.328	0.003	0	matDC
NET1	2.21844e-279	0.570639	0.492	0.009	3.87472e-275	matDC
GPR157	3.9485e-270	0.561423	0.475	0.009	6.89646e-266	matDC
NR4A3	3.22925e-266	0.327864	0.328	0.004	5.64021e-262	matDC
TSPAN13	5.73568e-137	0.299508	0.262	0.005	1.00179e-132	matDC
IDO1	4.75273e-132	0.453319	0.443	0.017	8.30113e-128	matDC
MGLL	7.26056e-128	0.300399	0.295	0.007	1.26813e-123	matDC
CSF2RA	2.69324e-127	1.03083	0.738	0.052	4.70401e-123	matDC
BIRC3	1.17563e-126	1.89166	0.934	0.093	2.05336e-122	matDC
MARCKSL1	3.55501e-119	1.1335	0.754	0.058	6.20918e-115	matDC
NRP2	8.25539e-115	0.31116	0.295	0.008	1.44189e-110	matDC
TMEM176A	4.50544e-113	0.758386	0.639	0.043	7.8692e-109	matDC
TBC1D8	5.70425e-103	0.298698	0.279	0.008	9.96305e-99	matDC
BCL2L14	1.2311e-92	0.298537	0.262	0.008	2.15024e-88	matDC
TNFAIP2	7.71993e-92	0.696435	0.623	0.049	1.34836e-87	matDC
CD83	1.17131e-91	0.578762	0.377	0.018	2.04581e-87	matDC
DUSP5	1.47402e-85	0.630606	0.377	0.019	2.57452e-81	matDC
MAP3K13	2.53311e-84	0.840741	0.82	0.096	4.42433e-80	matDC
BCL11A	4.96169e-81	0.426022	0.443	0.027	8.6661e-77	matDC
CDKN1A	4.62156e-76	0.646049	0.639	0.063	8.07201e-72	matDC
ETV3	1.12821e-74	0.385352	0.377	0.022	1.97054e-70	matDC
REPIN1	2.01236e-72	0.365286	0.377	0.023	3.51479e-68	matDC
RASSF4	8.65913e-65	0.640547	0.541	0.053	1.5124e-60	matDC
TMEM176B	3.61903e-64	0.632051	0.541	0.053	6.321e-60	matDC
RELB	3.78434e-64	0.386946	0.361	0.023	6.60972e-60	matDC
IRF4	4.62272e-62	0.311964	0.295	0.016	8.07404e-58	matDC
PTGIR	1.33587e-60	0.296772	0.328	0.02	2.33324e-56	matDC
CCR7	1.75738e-58	0.718445	0.557	0.062	3.06944e-54	matDC
HLA-DQA1	1.17113e-54	1.10794	0.82	0.151	2.04549e-50	matDC
MAP3K14	4.51878e-54	0.275951	0.295	0.018	7.8925e-50	matDC
KIF2A	2.24045e-51	0.632648	0.623	0.088	3.91316e-47	matDC
CERS6	1.01569e-50	0.42812	0.443	0.044	1.774e-46	matDC
BASP1	1.65879e-49	0.559099	0.508	0.059	2.89725e-45	matDC
CIITA	8.54479e-47	0.422829	0.426	0.044	1.49243e-42	matDC
LRRK1	5.60886e-42	0.390042	0.328	0.029	9.79643e-38	matDC
SPECC1	3.41589e-41	0.283998	0.262	0.019	5.96619e-37	matDC
TXN	9.6116e-41	1.78864	0.918	0.359	1.67876e-36	matDC
PPA1	1.22229e-40	1.37384	0.869	0.255	2.13486e-36	matDC
GRSF1	2.63274e-40	0.484323	0.443	0.056	4.59834e-36	matDC
HMGN3	1.63656e-39	0.87459	0.754	0.179	2.85842e-35	matDC
DUSP4	3.9997e-39	0.433429	0.295	0.026	6.98588e-35	matDC
PMAIP1	3.43174e-38	0.322252	0.311	0.029	5.99388e-34	matDC
GSN	1.12365e-34	0.463997	0.475	0.07	1.96256e-30	matDC
PTPN1	1.37549e-34	0.522712	0.59	0.111	2.40244e-30	matDC
H6PD	1.06208e-33	0.373134	0.393	0.049	1.85504e-29	matDC
DPYSL2	1.50177e-33	0.545684	0.59	0.107	2.62299e-29	matDC
LY75	1.52829e-33	0.306117	0.328	0.036	2.66932e-29	matDC
GPX4	2.29561e-33	1.08893	0.869	0.36	4.00951e-29	matDC
DAPP1	1.71513e-32	0.454756	0.475	0.075	2.99565e-28	matDC
UGCG	2.67387e-32	0.412398	0.393	0.052	4.67019e-28	matDC
RUFY3	5.53002e-31	0.264646	0.279	0.028	9.65873e-27	matDC
HLA-DPB1	9.47201e-31	1.66131	0.918	0.429	1.65438e-26	matDC
LGALS2	1.37894e-30	0.567292	0.492	0.083	2.40846e-26	matDC
ANKRD22	2.05261e-29	0.43196	0.492	0.085	3.58509e-25	matDC
C12orf45	9.9679e-28	0.29283	0.344	0.046	1.74099e-23	matDC
RFTN1	5.72099e-27	0.266841	0.295	0.036	9.99229e-23	matDC
RGS1	6.6702e-27	0.481628	0.426	0.071	1.16502e-22	matDC
SYNGR2	1.42312e-26	0.586172	0.508	0.107	2.48562e-22	matDC
TUBA1C	3.82853e-26	0.402414	0.443	0.079	6.6869e-22	matDC
CRIP1	9.20059e-26	1.10597	0.852	0.301	1.60697e-21	matDC
SOX4	1.22792e-25	0.337128	0.279	0.033	2.14468e-21	matDC
MALAT1	1.24525e-25	0.937427	1	0.999	2.17495e-21	matDC
GSTP1	1.66185e-24	0.823845	0.754	0.269	2.90258e-20	matDC
POGLUT1	2.8601e-24	0.365661	0.295	0.039	4.99544e-20	matDC
ZFAS1	3.93683e-24	0.915437	0.869	0.47	6.87606e-20	matDC
CD74	6.60749e-24	1.07244	0.984	0.592	1.15406e-19	matDC
CCNG2	6.95684e-24	0.321278	0.377	0.063	1.21508e-19	matDC
HLA-DRA	2.86057e-23	1.04049	0.967	0.516	4.99626e-19	matDC
SIAH2	8.21819e-23	0.33147	0.262	0.034	1.43539e-18	matDC
ZFAND5	1.73501e-22	0.460103	0.426	0.087	3.03038e-18	matDC
HLA-DPA1	3.51081e-22	0.981324	0.852	0.374	6.13199e-18	matDC
RAB9A	1.54352e-21	0.294384	0.311	0.049	2.69591e-17	matDC
IL13RA1	4.31094e-21	0.303214	0.426	0.085	7.5295e-17	matDC
ST3GAL5	6.32252e-21	0.369484	0.361	0.066	1.10429e-16	matDC
FTH1	1.27291e-20	0.950148	1	0.977	2.22326e-16	matDC
PNRC1	1.77725e-20	0.611345	0.689	0.222	3.10414e-16	matDC
NFKB1	6.01962e-20	0.3168	0.393	0.078	1.05139e-15	matDC
CEP350	2.00373e-19	0.414165	0.459	0.108	3.49971e-15	matDC
VOPP1	3.31858e-19	0.313873	0.393	0.081	5.79624e-15	matDC
GABARAPL2	3.59107e-19	0.599351	0.672	0.249	6.27216e-15	matDC
NABP1	9.29281e-19	0.506645	0.541	0.15	1.62308e-14	matDC
RPS27L	1.44293e-18	0.673055	0.787	0.354	2.52023e-14	matDC
CST7	3.46917e-18	0.537272	0.492	0.127	6.05926e-14	matDC
LGALS9	2.84385e-17	0.357326	0.508	0.139	4.96706e-13	matDC
REL	3.91994e-17	0.520115	0.557	0.177	6.84657e-13	matDC
TMSB10	1.23625e-16	0.779676	1	0.999	2.15923e-12	matDC
HINT1	1.33022e-16	0.591149	0.951	0.669	2.32336e-12	matDC
ALDH2	2.17887e-16	0.268787	0.295	0.055	3.80562e-12	matDC
RNF145	5.54575e-16	0.414818	0.41	0.102	9.68621e-12	matDC
AC025164.1	2.43411e-15	0.342833	0.311	0.063	4.25141e-11	matDC
EIF1	1.89581e-14	0.662045	0.967	0.965	3.31121e-10	matDC
CCDC88A	9.14428e-14	0.274002	0.443	0.123	1.59714e-09	matDC
EEF1A1	1.17649e-13	0.662202	1	0.998	2.05487e-09	matDC
CFLAR	1.3097e-13	0.364863	0.623	0.23	2.28752e-09	matDC
STK4	1.60293e-13	0.452179	0.754	0.341	2.79967e-09	matDC
CD84	1.70928e-13	0.269222	0.459	0.133	2.98543e-09	matDC
RAB13	2.12502e-13	0.300696	0.328	0.077	3.71156e-09	matDC
LGALS1	2.77959e-13	0.828186	0.902	0.601	4.85483e-09	matDC
ATOX1	3.08957e-13	0.388665	0.574	0.209	5.39625e-09	matDC
BTG1	4.30378e-13	0.619251	0.869	0.481	7.51697e-09	matDC
CTSH	1.48493e-12	0.365078	0.492	0.166	2.59358e-08	matDC
TUBB	2.50744e-12	0.42244	0.59	0.25	4.37949e-08	matDC
UBE2F	2.75106e-12	0.289444	0.377	0.106	4.80499e-08	matDC
RHOC	3.44493e-12	0.274031	0.311	0.077	6.01692e-08	matDC
ISCU	7.60943e-12	0.326548	0.541	0.203	1.32906e-07	matDC
IFI30	1.25917e-11	0.255833	0.426	0.127	2.19927e-07	matDC
NAP1L1	1.82226e-11	0.47521	0.77	0.421	3.18276e-07	matDC
RAP2B	3.50617e-11	0.393302	0.475	0.156	6.12387e-07	matDC
SEC61B	3.56504e-11	0.464387	0.836	0.472	6.2267e-07	matDC
ETV6	6.90776e-11	0.346584	0.328	0.091	1.20651e-06	matDC
RPL10	7.32486e-11	0.456205	1	1	1.27936e-06	matDC
LSP1	2.36937e-10	0.473798	0.639	0.304	4.13834e-06	matDC
ATF4	3.15366e-10	0.376102	0.426	0.157	5.50819e-06	matDC
CSTA	3.34938e-10	0.595091	0.508	0.198	5.85002e-06	matDC
H2AFZ	4.73433e-10	0.391349	0.705	0.353	8.26898e-06	matDC
PABPC1	5.68792e-10	0.382311	0.934	0.67	9.93452e-06	matDC
APPL1	7.82594e-10	0.269004	0.361	0.114	1.36688e-05	matDC
HLA-DQB1	1.08087e-08	0.438183	0.525	0.229	0.000188785	matDC
RPL15	1.56557e-08	0.317328	1	0.99	0.000273443	matDC
PPDPF	3.61341e-08	0.433906	0.787	0.519	0.000631119	matDC
FGD2	4.628e-08	0.298302	0.344	0.114	0.000808327	matDC
VDAC2	4.85e-08	0.276928	0.426	0.17	0.000847101	matDC
RAC1	4.97706e-08	0.47034	0.426	0.181	0.000869293	matDC
HSPB1	1.76188e-07	0.336945	0.344	0.128	0.0030773	matDC
C6orf62	2.49764e-07	0.513289	0.541	0.244	0.00436237	matDC
RPS9	2.84508e-07	0.264905	1	0.996	0.00496922	matDC
PTMA	5.54084e-07	0.342909	1	0.992	0.00967763	matDC
FNBP1	1.0274e-06	0.379674	0.475	0.24	0.0179446	matDC
TNFSF13B	2.20629e-06	0.260322	0.557	0.27	0.038535	matDC
ATP5MC2	2.55785e-06	0.328749	0.902	0.716	0.0446754	matDC
CCL2	1.59611e-288	1.20504	0.344	0.046	2.78777e-284	myeloid
CXCL10	9.32867e-247	1.1078	0.265	0.03	1.62935e-242	myeloid
MT-CO2	2.17356e-234	0.578827	0.999	0.997	3.79634e-230	myeloid
LST1	4.68485e-216	0.661381	0.741	0.293	8.18257e-212	myeloid
KCTD12	1.88044e-207	0.510353	0.569	0.172	3.28438e-203	myeloid
FCER1G	6.45528e-190	0.690416	0.837	0.387	1.12748e-185	myeloid
MT-ND4	8.07819e-180	0.504323	0.999	0.99	1.41094e-175	myeloid
S100A8	2.3423e-179	0.64738	0.841	0.411	4.09107e-175	myeloid
AIF1	6.57201e-177	0.603461	0.79	0.353	1.14787e-172	myeloid
PSAP	2.06043e-176	0.582888	0.676	0.279	3.59874e-172	myeloid
TYROBP	4.06659e-176	0.707161	0.856	0.427	7.10271e-172	myeloid
HLA-DRA	4.64978e-172	0.65555	0.879	0.486	8.12131e-168	myeloid
VCAN	1.08911e-170	0.601982	0.773	0.329	1.90224e-166	myeloid
S100A9	4.58445e-168	0.538858	0.828	0.395	8.00721e-164	myeloid
CYBB	1.63218e-166	0.41585	0.558	0.186	2.85077e-162	myeloid
FTL	9.44437e-163	0.790248	0.974	0.93	1.64955e-158	myeloid
FGL2	2.37633e-159	0.449809	0.5	0.16	4.1505e-155	myeloid
FTH1	9.05147e-158	0.698295	0.997	0.975	1.58093e-153	myeloid
MT-CO1	4.9164e-152	0.465919	0.998	0.998	8.58699e-148	myeloid
ACTB	1.74875e-147	0.513554	0.998	0.971	3.05436e-143	myeloid
SAT1	3.95169e-146	0.675105	0.864	0.564	6.90203e-142	myeloid
WARS	9.77142e-146	0.459974	0.465	0.154	1.70668e-141	myeloid
MT-CO3	1.17983e-145	0.401563	0.999	0.994	2.06068e-141	myeloid
LYZ	1.39162e-140	0.270602	0.815	0.402	2.4306e-136	myeloid
OAZ1	3.71996e-140	0.478637	0.969	0.821	6.49728e-136	myeloid
NPC2	5.93724e-139	0.549774	0.772	0.397	1.037e-134	myeloid
APOBEC3A	7.99622e-138	0.395462	0.368	0.101	1.39662e-133	myeloid
MAFB	1.55679e-133	0.457604	0.506	0.179	2.71908e-129	myeloid
CEBPB	7.97637e-133	0.389136	0.46	0.154	1.39315e-128	myeloid
CST3	1.82959e-129	0.424475	0.766	0.362	3.19556e-125	myeloid
CCR1	2.34403e-129	0.308937	0.409	0.127	4.09409e-125	myeloid
CTSB	1.05625e-128	0.503513	0.644	0.289	1.84484e-124	myeloid
PRELID1	7.04487e-126	0.49478	0.675	0.36	1.23046e-121	myeloid
MNDA	2.90006e-125	0.405662	0.549	0.209	5.06525e-121	myeloid
SNX10	1.44153e-124	0.346851	0.457	0.16	2.51778e-120	myeloid
TUBA1B	5.36305e-123	0.58807	0.695	0.366	9.3671e-119	myeloid
COTL1	1.26006e-122	0.410778	0.657	0.314	2.20083e-118	myeloid
VAMP5	2.81935e-122	0.623275	0.722	0.413	4.92427e-118	myeloid
GBP1	6.99978e-122	0.447577	0.535	0.221	1.22258e-117	myeloid
MARCKS	8.52659e-119	0.34255	0.458	0.16	1.48925e-114	myeloid
GNG5	1.00557e-116	0.409738	0.711	0.381	1.75633e-112	myeloid
SRGN	1.10568e-116	0.513559	0.908	0.701	1.93117e-112	myeloid
GLUL	3.22903e-115	0.407289	0.611	0.257	5.63982e-111	myeloid
SERF2	2.16473e-114	0.37144	0.991	0.948	3.78091e-110	myeloid
MARCH1	1.15313e-113	0.327134	0.473	0.174	2.01406e-109	myeloid
HLA-DRB1	3.73949e-113	0.3931	0.74	0.384	6.53139e-109	myeloid
FCN1	1.61388e-112	0.336353	0.456	0.161	2.8188e-108	myeloid
H3F3A	1.08965e-111	0.38637	0.975	0.844	1.90319e-107	myeloid
SH3BGRL3	8.95947e-110	0.412157	0.987	0.94	1.56486e-105	myeloid
POMP	1.03127e-109	0.459251	0.737	0.435	1.80121e-105	myeloid
TIMP1	2.48195e-108	0.563592	0.695	0.379	4.33497e-104	myeloid
SERPINA1	2.23416e-107	0.29643	0.448	0.161	3.90218e-103	myeloid
S100A11	6.44515e-107	0.498006	0.922	0.744	1.12571e-102	myeloid
TNFSF13B	8.98714e-107	0.454432	0.55	0.246	1.56969e-102	myeloid
TMEM167A	1.75392e-106	0.374937	0.572	0.261	3.06339e-102	myeloid
MEF2C	2.40676e-106	0.287426	0.369	0.121	4.20365e-102	myeloid
LGALS1	1.85544e-105	0.486251	0.892	0.577	3.24072e-101	myeloid
RAB31	2.01163e-105	0.311891	0.437	0.161	3.5135e-101	myeloid
C15orf48	5.54636e-105	0.719529	0.371	0.123	9.68727e-101	myeloid
MT-ND1	5.99488e-105	0.425878	0.98	0.94	1.04707e-100	myeloid
IFITM3	6.03489e-103	0.403607	0.588	0.253	1.05405e-98	myeloid
CD14	1.28153e-102	0.308725	0.415	0.145	2.23832e-98	myeloid
FKBP1A	1.30863e-102	0.373262	0.612	0.308	2.28565e-98	myeloid
CTSZ	9.70471e-101	0.262761	0.351	0.115	1.69503e-96	myeloid
DUSP6	2.40143e-100	0.280965	0.348	0.113	4.19433e-96	myeloid
CD74	8.07486e-100	0.370155	0.875	0.569	1.41036e-95	myeloid
RBM47	4.47782e-99	0.255657	0.332	0.105	7.82097e-95	myeloid
MT-ND3	4.09283e-98	0.514029	0.936	0.92	7.14854e-94	myeloid
SMCO4	1.15552e-97	0.28723	0.363	0.126	2.01824e-93	myeloid
LAP3	1.92216e-95	0.345338	0.472	0.197	3.35724e-91	myeloid
TYMP	1.82663e-94	0.430232	0.563	0.27	3.19039e-90	myeloid
MS4A6A	3.14488e-94	0.296901	0.423	0.158	5.49284e-90	myeloid
WSB1	5.54428e-94	0.375184	0.591	0.291	9.68363e-90	myeloid
HSBP1	7.63631e-94	0.307221	0.495	0.219	1.33376e-89	myeloid
FCGR3A	1.69248e-92	0.34168	0.364	0.127	2.95608e-88	myeloid
SPI1	2.59398e-91	0.254128	0.341	0.116	4.53065e-87	myeloid
ARPC5	4.98994e-91	0.370967	0.68	0.384	8.71543e-87	myeloid
CD163	1.38252e-90	0.401317	0.514	0.22	2.41471e-86	myeloid
C1orf162	6.34575e-89	0.328125	0.532	0.237	1.10835e-84	myeloid
MT-ATP6	2.86498e-87	0.287938	0.989	0.966	5.00398e-83	myeloid
HLA-DPA1	1.01527e-86	0.28125	0.681	0.349	1.77328e-82	myeloid
CALHM6	1.51272e-86	0.267678	0.285	0.087	2.64213e-82	myeloid
APLP2	3.44782e-85	0.268497	0.43	0.173	6.02197e-81	myeloid
ATP5F1E	4.17241e-85	0.333088	0.996	0.979	7.28753e-81	myeloid
CALM2	7.50729e-84	0.392615	0.775	0.523	1.31122e-79	myeloid
C4orf3	3.0638e-80	0.374062	0.826	0.568	5.35123e-76	myeloid
SOD2	5.38715e-80	0.341376	0.376	0.148	9.40919e-76	myeloid
STXBP2	5.80599e-80	0.316748	0.423	0.18	1.01407e-75	myeloid
STAT1	2.21747e-79	0.356552	0.557	0.296	3.87303e-75	myeloid
SMIM25	5.41314e-79	0.254084	0.329	0.118	9.4546e-75	myeloid
NAMPT	6.10558e-78	0.311947	0.468	0.205	1.0664e-73	myeloid
CTSS	1.11541e-77	0.354408	0.613	0.327	1.94817e-73	myeloid
FOS	5.0036e-77	0.344811	0.469	0.205	8.73928e-73	myeloid
VAMP8	1.34958e-76	0.342202	0.72	0.453	2.35717e-72	myeloid
MT-CYB	1.78961e-76	0.34375	0.976	0.928	3.12574e-72	myeloid
SEC61G	1.9283e-76	0.333469	0.804	0.561	3.36798e-72	myeloid
TMSB10	5.75983e-76	0.391852	1	0.999	1.00601e-71	myeloid
ARPC2	1.28447e-74	0.324546	0.935	0.799	2.24346e-70	myeloid
MT-ND2	3.88442e-74	0.391527	0.954	0.919	6.78452e-70	myeloid
FABP5	9.62788e-74	0.384531	0.318	0.12	1.68161e-69	myeloid
ZEB2	6.85455e-73	0.270355	0.435	0.192	1.19722e-68	myeloid
RTN4	3.53289e-72	0.270718	0.454	0.213	6.17055e-68	myeloid
S100A6	2.99926e-67	0.330802	0.982	0.926	5.2385e-63	myeloid
PGK1	4.56472e-66	0.320538	0.616	0.362	7.97273e-62	myeloid
AP2S1	1.29938e-63	0.284077	0.519	0.281	2.26949e-59	myeloid
TPI1	1.10267e-62	0.31066	0.722	0.473	1.92592e-58	myeloid
RBPJ	1.18455e-62	0.271707	0.511	0.269	2.06893e-58	myeloid
ZFP36L1	2.84001e-62	0.341513	0.632	0.37	4.96037e-58	myeloid
DUSP1	3.0861e-60	0.288256	0.379	0.17	5.39019e-56	myeloid
AP1S2	1.69811e-58	0.251133	0.457	0.232	2.96593e-54	myeloid
TPM3	4.15708e-56	0.271999	0.644	0.407	7.26076e-52	myeloid
ACTR2	7.87233e-56	0.255293	0.565	0.332	1.37498e-51	myeloid
CD63	1.04702e-55	0.278506	0.546	0.307	1.82872e-51	myeloid
DEK	6.20797e-55	0.267907	0.533	0.314	1.08428e-50	myeloid
TNFSF10	9.50206e-54	0.275369	0.383	0.187	1.65963e-49	myeloid
RHOA	9.84816e-54	0.255118	0.611	0.378	1.72008e-49	myeloid
ISG15	5.35889e-52	0.429255	0.633	0.435	9.35984e-48	myeloid
RBX1	4.38358e-50	0.257617	0.596	0.376	7.65636e-46	myeloid
COX8A	5.92472e-50	0.26342	0.692	0.49	1.03481e-45	myeloid
H3F3B	2.11348e-48	0.341499	0.957	0.886	3.6914e-44	myeloid
ARPC1B	8.73052e-47	0.269784	0.659	0.463	1.52487e-42	myeloid
HNRNPA2B1	1.05956e-44	0.260701	0.594	0.392	1.85062e-40	myeloid
SNRPG	3.19652e-43	0.289367	0.582	0.391	5.58304e-39	myeloid
H2AFZ	5.84436e-43	0.461277	0.513	0.34	1.02078e-38	myeloid
PSME2	2.91794e-42	0.27553	0.561	0.357	5.09648e-38	myeloid
PFN1	1.15028e-40	0.266609	0.959	0.904	2.00907e-36	myeloid
DYNLL1	6.79918e-40	0.26703	0.552	0.361	1.18754e-35	myeloid
CYBA	3.12815e-36	0.268735	0.856	0.747	5.46363e-32	myeloid
MT-ND5	3.82977e-33	0.255204	0.627	0.439	6.68908e-29	myeloid
HMGN2	7.30843e-28	0.307317	0.486	0.334	1.27649e-23	myeloid
HMGB2	5.02508e-15	0.476929	0.403	0.314	8.77681e-11	myeloid
ALOX5AP	1.77755e-11	0.266902	0.412	0.321	3.10467e-07	myeloid
S100A8	0	2.01753	0.959	0.314	0	granulo
TIMP1	0	1.96932	0.83	0.295	0	granulo
S100A9	0	1.92688	0.957	0.294	0	granulo
MT2A	0	1.583	0.804	0.515	0	granulo
FTH1	0	1.57426	1	0.971	0	granulo
SPP1	0	1.52246	0.259	0.028	0	granulo
TYROBP	0	1.4785	0.971	0.33	0	granulo
FTL	0	1.44091	0.995	0.918	0	granulo
VCAN	0	1.43598	0.928	0.219	0	granulo
SRGN	0	1.36293	0.973	0.651	0	granulo
FCER1G	0	1.34839	0.955	0.287	0	granulo
SAT1	0	1.30932	0.968	0.491	0	granulo
GLUL	0	1.17844	0.767	0.162	0	granulo
AIF1	0	1.17334	0.921	0.251	0	granulo
LGALS1	0	1.11565	0.934	0.517	0	granulo
C15orf48	0	1.06161	0.44	0.066	0	granulo
NAMPT	0	1.04185	0.667	0.112	0	granulo
FOS	0	1.02039	0.672	0.112	0	granulo
NPC2	0	1.00165	0.888	0.308	0	granulo
IFITM3	0	0.99552	0.733	0.163	0	granulo
HLA-DRA	0	0.954689	0.929	0.411	0	granulo
S100A11	0	0.94012	0.969	0.705	0	granulo
THBS1	0	0.928359	0.553	0.074	0	granulo
ZFP36L1	0	0.916496	0.798	0.287	0	granulo
S100A12	0	0.913287	0.555	0.049	0	granulo
CST3	0	0.904824	0.904	0.264	0	granulo
CD14	0	0.90326	0.516	0.077	0	granulo
VAMP5	0	0.860974	0.741	0.36	0	granulo
C4orf3	0	0.83924	0.908	0.506	0	granulo
CD163	0	0.82995	0.708	0.125	0	granulo
TPI1	0	0.815502	0.807	0.412	0	granulo
S100A6	0	0.810831	0.989	0.915	0	granulo
LST1	0	0.78656	0.81	0.206	0	granulo
MNDA	0	0.753876	0.684	0.122	0	granulo
C1orf162	0	0.743851	0.716	0.144	0	granulo
CD63	0	0.742685	0.708	0.227	0	granulo
LYZ	0	0.741077	0.925	0.309	0	granulo
PSAP	0	0.735652	0.777	0.191	0	granulo
OAZ1	0	0.721809	0.99	0.792	0	granulo
DUSP1	0	0.707707	0.572	0.087	0	granulo
H3F3A	0	0.70677	0.984	0.821	0	granulo
CTSS	0	0.698079	0.749	0.248	0	granulo
BNIP3L	0	0.693663	0.66	0.158	0	granulo
CTSB	0	0.692298	0.775	0.2	0	granulo
MAFB	0	0.683374	0.605	0.103	0	granulo
MIF	0	0.664344	0.855	0.61	0	granulo
TMSB10	0	0.663432	0.999	0.999	0	granulo
PGK1	0	0.648774	0.741	0.291	0	granulo
CYBA	0	0.648147	0.928	0.712	0	granulo
SLC2A3	0	0.646884	0.545	0.159	0	granulo
NEAT1	0	0.63888	0.943	0.772	0	granulo
TYMP	0	0.636892	0.65	0.202	0	granulo
GAPDH	0	0.632423	0.982	0.951	0	granulo
TNFSF13B	0	0.627353	0.636	0.177	0	granulo
HLA-DRB1	0	0.625077	0.773	0.32	0	granulo
CSTA	0	0.62034	0.625	0.09	0	granulo
FCN1	0	0.615908	0.576	0.085	0	granulo
SH3BGRL3	0	0.583719	0.992	0.931	0	granulo
SERPINA1	0	0.573069	0.562	0.087	0	granulo
CALM2	0	0.572343	0.812	0.474	0	granulo
VAMP8	0	0.563517	0.752	0.404	0	granulo
PLIN2	0	0.557165	0.356	0.073	0	granulo
SERF2	0	0.548227	0.998	0.94	0	granulo
STXBP2	0	0.535884	0.532	0.114	0	granulo
CD74	0	0.532858	0.892	0.517	0	granulo
KCTD12	0	0.524737	0.581	0.107	0	granulo
ACTB	0	0.520245	0.999	0.966	0	granulo
BCL2A1	0	0.517796	0.479	0.078	0	granulo
APLP2	0	0.516035	0.563	0.099	0	granulo
CEBPB	0	0.513356	0.5	0.096	0	granulo
SOD2	0	0.511333	0.42	0.101	0	granulo
MARCO	0	0.507936	0.35	0.043	0	granulo
FCGR2A	0	0.506558	0.531	0.085	0	granulo
TMEM167A	0	0.499881	0.605	0.204	0	granulo
PKM	0	0.497579	0.628	0.255	0	granulo
CYBB	0	0.49557	0.59	0.12	0	granulo
GNG5	0	0.49413	0.733	0.325	0	granulo
MARCH1	0	0.485842	0.558	0.106	0	granulo
SLC25A37	0	0.483821	0.476	0.111	0	granulo
IL1R2	0	0.483443	0.313	0.049	0	granulo
CEBPD	0	0.461997	0.472	0.108	0	granulo
TSPO	0	0.456957	0.659	0.29	0	granulo
FGL2	0	0.455372	0.496	0.108	0	granulo
ZEB2	0	0.452976	0.55	0.125	0	granulo
SMIM25	0	0.449912	0.447	0.054	0	granulo
LAP3	0	0.447359	0.506	0.146	0	granulo
RAB31	0	0.445802	0.526	0.096	0	granulo
GCA	0	0.442967	0.477	0.085	0	granulo
SDCBP	0	0.439634	0.536	0.149	0	granulo
MS4A6A	0	0.437823	0.478	0.103	0	granulo
FBP1	0	0.433757	0.388	0.054	0	granulo
APOBEC3A	0	0.430272	0.38	0.057	0	granulo
WARS	0	0.430224	0.455	0.108	0	granulo
SLC11A1	0	0.422422	0.449	0.065	0	granulo
FPR1	0	0.418321	0.445	0.067	0	granulo
SNX10	0	0.414632	0.461	0.113	0	granulo
WSB1	0	0.412356	0.642	0.231	0	granulo
EGR1	0	0.412004	0.416	0.072	0	granulo
SLC16A3	0	0.40736	0.463	0.095	0	granulo
IFNGR2	0	0.402796	0.534	0.118	0	granulo
LY96	0	0.401587	0.512	0.131	0	granulo
RNASE6	0	0.39368	0.415	0.074	0	granulo
HK2	0	0.389559	0.336	0.047	0	granulo
IFI30	0	0.37974	0.369	0.066	0	granulo
FCGR3A	0	0.376806	0.39	0.083	0	granulo
FCGR1A	0	0.376273	0.403	0.066	0	granulo
PLSCR1	0	0.375986	0.478	0.132	0	granulo
HLA-DQB1	0	0.373133	0.533	0.152	0	granulo
DUSP6	0	0.364111	0.38	0.068	0	granulo
ADM	0	0.358117	0.304	0.028	0	granulo
LILRA5	0	0.356145	0.365	0.055	0	granulo
CSF3R	0	0.355301	0.4	0.077	0	granulo
CCR1	0	0.350337	0.42	0.081	0	granulo
TLR2	0	0.346136	0.383	0.053	0	granulo
CLEC7A	0	0.344688	0.612	0.153	0	granulo
CD68	0	0.342628	0.391	0.063	0	granulo
SPI1	0	0.324261	0.386	0.069	0	granulo
AQP9	0	0.316258	0.335	0.035	0	granulo
CFD	0	0.308768	0.332	0.045	0	granulo
GRINA	0	0.304296	0.384	0.079	0	granulo
CD93	0	0.299301	0.321	0.05	0	granulo
PIK3AP1	0	0.297636	0.334	0.055	0	granulo
TGFBI	0	0.292459	0.328	0.05	0	granulo
HNMT	0	0.292134	0.327	0.049	0	granulo
LYN	0	0.29068	0.369	0.067	0	granulo
FCGRT	0	0.290388	0.364	0.073	0	granulo
NCF2	0	0.288974	0.333	0.055	0	granulo
RNF130	0	0.28753	0.375	0.075	0	granulo
ACSL1	0	0.282558	0.32	0.049	0	granulo
RBM47	0	0.280952	0.346	0.066	0	granulo
BACH1	0	0.278575	0.338	0.064	0	granulo
PHC2	0	0.272635	0.312	0.051	0	granulo
FGR	0	0.269376	0.309	0.05	0	granulo
RAB13	0	0.263271	0.259	0.032	0	granulo
CLEC4E	0	0.259929	0.259	0.024	0	granulo
CD300E	0	0.256156	0.255	0.028	0	granulo
MARCKS	1.14724e-305	0.339267	0.453	0.115	2.00376e-301	granulo
GK	1.15532e-302	0.273946	0.309	0.054	2.01789e-298	granulo
VSIG4	3.09655e-302	0.293103	0.298	0.049	5.40843e-298	granulo
MS4A7	3.37358e-301	0.311239	0.297	0.049	5.89229e-297	granulo
BNIP3	3.19416e-300	0.383225	0.402	0.104	5.57891e-296	granulo
GRN	6.97653e-298	0.319861	0.407	0.101	1.21852e-293	granulo
LDHA	2.38512e-296	0.600469	0.773	0.477	4.16584e-292	granulo
H3F3B	1.70986e-288	0.556401	0.963	0.873	2.98645e-284	granulo
MPEG1	4.53183e-288	0.253508	0.305	0.055	7.9153e-284	granulo
PFKFB3	4.23133e-287	0.266647	0.274	0.043	7.39044e-283	granulo
MEF2C	3.69111e-279	0.281871	0.365	0.084	6.4469e-275	granulo
JUNB	9.53205e-279	0.483236	0.562	0.222	1.66487e-274	granulo
SAP30	2.80887e-278	0.263031	0.267	0.041	4.90597e-274	granulo
CALHM6	3.99396e-275	0.420815	0.294	0.054	6.97584e-271	granulo
ARPC5	9.6385e-275	0.419331	0.694	0.335	1.68346e-270	granulo
HSBP1	5.28884e-274	0.352601	0.504	0.173	9.23749e-270	granulo
S100A10	6.0222e-270	0.579672	0.866	0.667	1.05184e-265	granulo
RGS2	1.84188e-260	0.378871	0.252	0.041	3.21703e-256	granulo
SEC61G	2.2004e-260	0.476835	0.802	0.524	3.84322e-256	granulo
COTL1	3.32134e-258	0.379958	0.626	0.269	5.80105e-254	granulo
ATF5	1.93362e-257	0.339015	0.369	0.095	3.37726e-253	granulo
CNIH4	5.69944e-255	0.326583	0.387	0.109	9.95464e-251	granulo
AP2S1	7.33515e-253	0.389118	0.562	0.233	1.28116e-248	granulo
IFI6	2.15713e-247	0.52647	0.58	0.26	3.76765e-243	granulo
SNX3	5.4033e-247	0.372303	0.65	0.315	9.4374e-243	granulo
SOCS3	4.25976e-245	0.312369	0.335	0.083	7.4401e-241	granulo
ENO1	4.29032e-245	0.540148	0.722	0.435	7.49348e-241	granulo
RAC1	9.74034e-245	0.320454	0.409	0.123	1.70125e-240	granulo
SMCO4	7.39329e-244	0.261619	0.354	0.091	1.29131e-239	granulo
HLA-DPB1	9.82008e-243	0.387545	0.699	0.362	1.71517e-238	granulo
RBPJ	2.6169e-240	0.350005	0.551	0.221	4.57068e-236	granulo
ZFP36	5.67346e-237	0.389277	0.477	0.176	9.90927e-233	granulo
IFNGR1	4.63396e-235	0.267808	0.371	0.104	8.09367e-231	granulo
HLA-DPA1	1.0553e-233	0.380284	0.656	0.304	1.84318e-229	granulo
VMP1	4.71142e-230	0.32287	0.635	0.283	8.22897e-226	granulo
POMP	7.51961e-230	0.407766	0.717	0.394	1.31337e-225	granulo
HLA-DMA	7.97192e-230	0.311345	0.426	0.137	1.39238e-225	granulo
BRI3	5.20439e-225	0.28224	0.284	0.063	9.08999e-221	granulo
RHOA	9.15981e-225	0.382263	0.65	0.332	1.59985e-220	granulo
ATP6V0E1	1.41031e-223	0.37455	0.659	0.344	2.46324e-219	granulo
EIF4EBP1	7.88836e-222	0.262035	0.341	0.094	1.37778e-217	granulo
SAMSN1	2.10488e-219	0.326172	0.422	0.146	3.67638e-215	granulo
IER3	5.8405e-215	0.255976	0.268	0.058	1.0201e-210	granulo
MT-CO1	8.80821e-213	0.331042	0.998	0.998	1.53844e-208	granulo
MCL1	1.22141e-212	0.372003	0.548	0.251	2.13332e-208	granulo
FKBP1A	7.81975e-211	0.343282	0.581	0.269	1.3658e-206	granulo
EFHD2	7.74346e-208	0.251912	0.366	0.112	1.35247e-203	granulo
GABARAP	3.22492e-207	0.332737	0.324	0.093	5.63264e-203	granulo
RNF181	9.05837e-206	0.309843	0.461	0.181	1.58213e-201	granulo
GSTO1	2.74946e-205	0.307149	0.455	0.175	4.80221e-201	granulo
ANXA5	5.24993e-202	0.349253	0.43	0.159	9.16952e-198	granulo
LAPTM4A	4.85701e-201	0.25307	0.349	0.107	8.48326e-197	granulo
AP1S2	7.42264e-201	0.296392	0.485	0.19	1.29644e-196	granulo
H2AFY	9.13333e-201	0.302456	0.511	0.214	1.59523e-196	granulo
RNASET2	2.5371e-198	0.361567	0.528	0.239	4.43131e-194	granulo
PYCARD	4.41058e-193	0.30108	0.509	0.221	7.70352e-189	granulo
PCBP1	1.80673e-190	0.344045	0.645	0.35	3.15564e-186	granulo
UPP1	2.42884e-183	0.29407	0.425	0.167	4.24222e-179	granulo
IFITM2	9.86461e-183	0.516713	0.745	0.541	1.72295e-178	granulo
EPSTI1	1.85378e-182	0.302082	0.422	0.163	3.23782e-178	granulo
SERPINB1	2.08905e-180	0.28874	0.447	0.183	3.64874e-176	granulo
GLRX	2.47578e-180	0.337629	0.511	0.236	4.3242e-176	granulo
GBP1	9.53636e-178	0.363121	0.456	0.192	1.66562e-173	granulo
BLOC1S1	1.44296e-177	0.326649	0.586	0.301	2.52027e-173	granulo
PNRC1	1.74917e-177	0.309256	0.428	0.171	3.0551e-173	granulo
CTSD	8.98276e-177	0.303164	0.375	0.136	1.56893e-172	granulo
RTN4	2.44885e-176	0.257276	0.443	0.179	4.27716e-172	granulo
TUBA1B	2.4303e-169	0.413758	0.614	0.335	4.24476e-165	granulo
VSIR	5.72174e-169	0.255786	0.396	0.153	9.99359e-165	granulo
VIM	2.39795e-168	0.416054	0.864	0.683	4.18826e-164	granulo
MGAT1	1.21839e-167	0.264761	0.346	0.122	2.12805e-163	granulo
IER2	2.54101e-163	0.365107	0.48	0.222	4.43812e-159	granulo
MT-ND1	2.7844e-162	0.320969	0.974	0.935	4.86324e-158	granulo
DYNLT1	1.41385e-161	0.279952	0.472	0.214	2.46943e-157	granulo
FKBP5	2.97247e-160	0.322405	0.513	0.251	5.19172e-156	granulo
DAZAP2	6.96037e-159	0.282303	0.524	0.257	1.2157e-154	granulo
RHOG	9.18624e-158	0.265877	0.465	0.209	1.60447e-153	granulo
MYL6	1.442e-154	0.351271	0.913	0.793	2.5186e-150	granulo
LAPTM5	4.14378e-151	0.333273	0.735	0.51	7.23752e-147	granulo
MT-ND3	1.0386e-149	0.359807	0.959	0.911	1.81402e-145	granulo
FAM162A	1.64728e-145	0.271163	0.352	0.14	2.87714e-141	granulo
BTG2	3.72511e-143	0.284003	0.297	0.104	6.50628e-139	granulo
ATP6V1F	7.00179e-141	0.277594	0.508	0.261	1.22293e-136	granulo
NFKBIA	1.52764e-139	0.375056	0.38	0.161	2.66818e-135	granulo
PGAM1	2.45209e-139	0.253731	0.469	0.226	4.28282e-135	granulo
TNFSF10	3.16649e-139	0.271471	0.379	0.158	5.53058e-135	granulo
PRELID1	6.29107e-135	0.300051	0.587	0.334	1.0988e-130	granulo
ARPC3	7.41633e-130	0.310666	0.745	0.551	1.29534e-125	granulo
NOP10	1.07572e-129	0.288198	0.582	0.341	1.87885e-125	granulo
PTMA	1.30803e-127	0.262041	0.996	0.991	2.2846e-123	granulo
ATP5F1E	1.44501e-125	0.338611	0.983	0.98	2.52385e-121	granulo
TPM3	9.22816e-125	0.25973	0.627	0.374	1.61179e-120	granulo
HSPA5	1.09329e-122	0.252261	0.342	0.142	1.90953e-118	granulo
STAT1	4.27976e-118	0.288406	0.498	0.27	7.47503e-114	granulo
DEK	1.54271e-114	0.264235	0.516	0.284	2.6945e-110	granulo
ALOX5AP	4.11362e-110	0.593872	0.489	0.287	7.18484e-106	granulo
ATP6V1G1	3.47891e-109	0.267078	0.671	0.461	6.07627e-105	granulo
ITM2B	4.36088e-98	0.260129	0.723	0.519	7.61672e-94	granulo
ISG15	5.74931e-95	0.438626	0.577	0.419	1.00417e-90	granulo
PSME2	5.65262e-81	0.270972	0.519	0.336	9.87286e-77	granulo
GBP5	2.16015e-67	0.27827	0.316	0.171	3.77292e-63	granulo
LY6E	2.6957e-63	0.285179	0.592	0.467	4.70832e-59	granulo
EMP3	2.60028e-61	0.262901	0.607	0.46	4.54164e-57	granulo
MT1X	1.12157e-31	0.529595	0.32	0.228	1.95893e-27	granulo
BTG1	2.6084e-07	0.388881	0.495	0.48	0.00455584	granulo
GNLY	0	1.90663	0.97	0.103	0	NK
CCL5	7.66092e-225	0.79636	0.788	0.239	1.33806e-220	NK
NKG7	1.92249e-198	0.662711	0.624	0.174	3.35782e-194	NK
GZMB	4.41897e-198	0.522548	0.403	0.073	7.71817e-194	NK
KLRD1	5.80622e-196	0.512007	0.385	0.067	1.01411e-191	NK
RPS27	4.70932e-97	0.439005	1	1	8.2253e-93	NK
RPL31	3.2145e-85	0.378506	1	0.978	5.61444e-81	NK
RPS19	1.20875e-83	0.383937	1	0.998	2.11121e-79	NK
HOPX	6.36431e-81	0.26087	0.356	0.113	1.11159e-76	NK
RPL23A	1.42578e-80	0.344853	1	0.988	2.49027e-76	NK
LYAR	7.03249e-77	0.374164	0.488	0.207	1.22829e-72	NK
CD8B	8.47235e-74	0.252194	0.271	0.075	1.47978e-69	NK
RPS15A	8.32778e-73	0.368366	1	0.996	1.45453e-68	NK
PRF1	2.21357e-70	0.254838	0.278	0.081	3.86623e-66	NK
RPL27A	2.13121e-69	0.315819	1	0.994	3.72237e-65	NK
RPS3	5.41021e-67	0.316262	1	0.988	9.44948e-63	NK
RPL14	3.19924e-63	0.306935	1	0.969	5.58779e-59	NK
RPS12	8.49833e-62	0.359532	1	0.996	1.48432e-57	NK
RPL21	7.93808e-61	0.293095	0.999	0.999	1.38647e-56	NK
RPS25	1.65658e-59	0.303371	1	0.991	2.89337e-55	NK
RPL41	1.95162e-59	0.289128	1	1	3.4087e-55	NK
RPS27A	4.91449e-58	0.310709	1	0.997	8.58364e-54	NK
RPLP2	1.31602e-56	0.289519	1	0.998	2.29857e-52	NK
RPL13A	1.77182e-56	0.270182	1	0.999	3.09467e-52	NK
CD52	1.88195e-56	0.386693	0.902	0.715	3.28702e-52	NK
IL7R	8.18713e-56	0.386535	0.592	0.321	1.42996e-51	NK
RPS14	1.26735e-55	0.263902	1	0.998	2.21356e-51	NK
RPS18	4.59779e-53	0.302525	1	0.997	8.0305e-49	NK
RPL26	2.08259e-52	0.276579	1	0.996	3.63746e-48	NK
RPS15	1.3128e-50	0.250574	1	0.998	2.29293e-46	NK
RPL32	1.96838e-49	0.27256	1	0.998	3.43796e-45	NK
RPS23	3.79328e-48	0.262028	1	0.992	6.62535e-44	NK
RPS26	1.49729e-45	0.364584	0.937	0.921	2.61517e-41	NK
RPS21	1.83855e-45	0.270197	0.992	0.967	3.21122e-41	NK
RPL30	2.01377e-44	0.260611	1	0.99	3.51725e-40	NK
RPL3	7.17526e-44	0.252982	0.999	0.978	1.25323e-39	NK
RPLP1	9.82824e-44	0.281604	1	0.999	1.7166e-39	NK
RPL10	1.0574e-43	0.257439	1	0.999	1.84686e-39	NK
RPSA	2.28634e-42	0.250612	0.985	0.874	3.99333e-38	NK
CD2	1.64798e-39	0.261277	0.58	0.344	2.87835e-35	NK
CD7	1.15168e-37	0.251993	0.411	0.214	2.01153e-33	NK
RPS4Y1	1.81163e-30	0.285087	0.405	0.227	3.16419e-26	NK
KLRD1	0	1.04391	0.725	0.063	0	gdTC
TRDC	0	0.970858	0.558	0.017	0	gdTC
CTSW	0	0.694381	0.555	0.052	0	gdTC
KLRC1	0	0.674478	0.391	0.018	0	gdTC
XCL1	0	0.591438	0.414	0.005	0	gdTC
XCL2	0	0.505842	0.358	0.01	0	gdTC
KLRC2	0	0.488666	0.278	0.005	0	gdTC
CD7	2.5219e-203	0.924457	0.758	0.206	4.40475e-199	gdTC
NKG7	3.44411e-195	1.20485	0.718	0.183	6.01548e-191	gdTC
GNLY	1.18231e-181	1.58141	0.609	0.138	2.06502e-177	gdTC
CMC1	4.41749e-166	1.03773	0.475	0.089	7.71559e-162	gdTC
TRGC2	1.56456e-151	0.564213	0.36	0.052	2.73266e-147	gdTC
MATK	1.14377e-146	0.349764	0.351	0.05	1.99771e-142	gdTC
TXK	2.47002e-125	0.326646	0.332	0.052	4.31413e-121	gdTC
HOPX	6.79117e-87	0.489509	0.426	0.117	1.18615e-82	gdTC
GZMB	7.39641e-87	0.583422	0.36	0.083	1.29186e-82	gdTC
IL2RB	9.24303e-66	0.309229	0.278	0.064	1.61439e-61	gdTC
CCL5	2.7719e-56	0.548166	0.612	0.26	4.8414e-52	gdTC
MALAT1	1.78937e-47	0.350665	1	0.999	3.12532e-43	gdTC
HCST	1.49957e-44	0.414222	0.856	0.638	2.61916e-40	gdTC
IFITM1	4.44368e-42	0.407811	0.494	0.229	7.76133e-38	gdTC
ID2	1.85838e-39	0.421459	0.506	0.252	3.24585e-35	gdTC
HLA-A	8.31555e-38	0.422329	0.896	0.773	1.45239e-33	gdTC
DDIT4	1.13336e-32	0.388323	0.576	0.335	1.97953e-28	gdTC
CCL4	4.17131e-32	0.583684	0.289	0.11	7.28562e-28	gdTC
B2M	7.08086e-32	0.329778	1	0.999	1.23674e-27	gdTC
UBB	9.87946e-31	0.342808	0.574	0.338	1.72555e-26	gdTC
IFITM2	2.35598e-29	0.317235	0.767	0.576	4.11496e-25	gdTC
RPS3	1.95176e-28	0.254048	1	0.989	3.40894e-24	gdTC
CD69	2.66742e-24	0.299943	0.372	0.186	4.65892e-20	gdTC
HLA-C	6.75479e-24	0.298063	0.948	0.847	1.17979e-19	gdTC
TXNIP	4.86357e-23	0.342595	0.805	0.666	8.49472e-19	gdTC
SELL	1.44118e-20	0.264267	0.313	0.155	2.51716e-16	gdTC
LYAR	5.82787e-19	0.285162	0.381	0.219	1.0179e-14	gdTC
CD52	2.22616e-14	0.296477	0.833	0.723	3.8882e-10	gdTC
IL32	1.85418e-10	0.391918	0.522	0.411	3.23851e-06	gdTC
CCL5	0	1.87358	0.968	0.189	0	CD8
GZMA	0	1.21641	0.722	0.135	0	CD8
GZMK	0	1.16508	0.558	0.061	0	CD8
NKG7	0	0.893454	0.667	0.145	0	CD8
GZMH	0	0.706397	0.437	0.037	0	CD8
CD8B	0	0.56737	0.458	0.042	0	CD8
CD8A	0	0.542804	0.442	0.045	0	CD8
CST7	0	0.533114	0.501	0.084	0	CD8
CCL4	8.17059e-305	0.465091	0.429	0.079	1.42707e-300	CD8
ITM2C	4.84314e-254	0.355905	0.279	0.039	8.45903e-250	CD8
CD27	6.48655e-254	0.470851	0.439	0.105	1.13294e-249	CD8
IL32	3.15051e-248	0.719352	0.802	0.369	5.50268e-244	CD8
APOBEC3G	9.61596e-246	0.498897	0.435	0.108	1.67952e-241	CD8
STK17A	5.01539e-245	0.463267	0.443	0.112	8.75988e-241	CD8
CD2	3.02344e-236	0.648315	0.718	0.315	5.28074e-232	CD8
CD3D	2.1462e-234	0.628444	0.723	0.323	3.74856e-230	CD8
PRF1	5.6534e-227	0.369549	0.337	0.064	9.87423e-223	CD8
TRAC	1.30369e-221	0.754002	0.658	0.283	2.27702e-217	CD8
CXCR3	4.01203e-210	0.324026	0.314	0.061	7.00741e-206	CD8
LCK	1.65604e-206	0.444208	0.5	0.162	2.89244e-202	CD8
CD52	1.72285e-189	0.607626	0.957	0.699	3.00914e-185	CD8
HLA-A	5.20105e-184	0.71318	0.926	0.76	9.08416e-180	CD8
TRBC2	4.87785e-171	0.618405	0.528	0.21	8.51965e-167	CD8
CORO1A	1.28749e-162	0.620157	0.781	0.51	2.24873e-158	CD8
RARRES3	9.88419e-150	0.480952	0.618	0.316	1.72637e-145	CD8
CD3G	1.19091e-137	0.426814	0.551	0.236	2.08005e-133	CD8
GZMB	1.98809e-136	0.321972	0.282	0.07	3.4724e-132	CD8
CD3E	1.31466e-135	0.358005	0.49	0.199	2.29618e-131	CD8
EVL	1.37046e-129	0.423856	0.521	0.242	2.39364e-125	CD8
GIMAP7	2.38226e-128	0.411286	0.601	0.304	4.16085e-124	CD8
HLA-C	8.20405e-127	0.466594	0.934	0.841	1.43292e-122	CD8
TMSB4X	4.25898e-124	0.420846	0.999	1	7.43873e-120	CD8
CLEC2D	1.45082e-121	0.34032	0.492	0.21	2.534e-117	CD8
GZMM	8.75555e-121	0.263274	0.34	0.111	1.52924e-116	CD8
LYAR	2.51794e-120	0.337405	0.471	0.195	4.39783e-116	CD8
ARHGDIB	8.8728e-107	0.454842	0.819	0.635	1.54972e-102	CD8
CYTOR	4.74296e-106	0.30966	0.422	0.177	8.28406e-102	CD8
LIMD2	1.57686e-104	0.385858	0.536	0.281	2.75414e-100	CD8
IDH2	1.87062e-102	0.279687	0.368	0.143	3.26723e-98	CD8
GYPC	4.01107e-102	0.323957	0.491	0.237	7.00573e-98	CD8
C12orf75	1.84145e-101	0.2621	0.363	0.138	3.21627e-97	CD8
IL2RG	5.9618e-97	0.28464	0.401	0.169	1.04129e-92	CD8
HMGB1	1.93481e-96	0.339409	0.814	0.58	3.37934e-92	CD8
PTPRC	6.92162e-95	0.372034	0.727	0.498	1.20893e-90	CD8
B2M	4.45002e-83	0.316955	1	0.999	7.77241e-79	CD8
CXCR4	8.44408e-81	0.372927	0.566	0.334	1.47484e-76	CD8
HCST	1.19747e-77	0.300657	0.836	0.623	2.09151e-73	CD8
UBB	2.87193e-77	0.399305	0.53	0.324	5.01611e-73	CD8
CD7	4.44165e-75	0.256016	0.423	0.202	7.75779e-71	CD8
CD99	7.20144e-73	0.318445	0.544	0.311	1.2578e-68	CD8
PPP2R5C	5.13912e-72	0.326456	0.513	0.283	8.97599e-68	CD8
RAC2	3.63059e-71	0.282852	0.499	0.283	6.34119e-67	CD8
PDCD4	1.12367e-69	0.363628	0.399	0.19	1.96261e-65	CD8
PFN1	4.48331e-66	0.367751	0.94	0.905	7.83054e-62	CD8
TRBC1	5.73542e-63	0.545777	0.377	0.193	1.00175e-58	CD8
SARAF	1.00184e-62	0.287827	0.705	0.503	1.74981e-58	CD8
LSP1	1.24469e-62	0.307839	0.482	0.285	2.17397e-58	CD8
HLA-B	6.33651e-62	0.271154	0.981	0.94	1.10673e-57	CD8
GIMAP4	3.54726e-61	0.315818	0.547	0.353	6.19564e-57	CD8
ACTG1	6.62319e-59	0.445259	0.846	0.771	1.15681e-54	CD8
HSPA8	1.51903e-56	0.255787	0.694	0.48	2.65314e-52	CD8
MYL12B	6.40646e-56	0.30988	0.578	0.404	1.11895e-51	CD8
MYL12A	7.48837e-53	0.264258	0.807	0.667	1.30792e-48	CD8
GMFG	1.49214e-52	0.25639	0.686	0.514	2.60617e-48	CD8
APOBEC3C	4.1422e-52	0.305386	0.38	0.2	7.23477e-48	CD8
LDHB	5.11317e-52	0.265655	0.566	0.362	8.93066e-48	CD8
UBC	2.27036e-44	0.300583	0.513	0.355	3.96542e-40	CD8
UCP2	4.26829e-40	0.272766	0.421	0.272	7.455e-36	CD8
LTB	2.55559e-296	1.59444	0.926	0.452	4.4636e-292	Treg
IL2RA	4.56636e-222	0.527082	0.298	0.037	7.9756e-218	Treg
TNFRSF4	1.96973e-187	0.425856	0.337	0.057	3.44033e-183	Treg
LINC01943	1.54595e-176	0.396254	0.307	0.05	2.70016e-172	Treg
TNFRSF18	5.90264e-168	0.301492	0.324	0.058	1.03096e-163	Treg
IL32	5.40958e-121	0.698895	0.767	0.391	9.44838e-117	Treg
TRAC	4.55593e-93	0.483457	0.645	0.301	7.95738e-89	Treg
S100A4	1.24151e-85	0.56883	0.963	0.898	2.16842e-81	Treg
MAF	2.28555e-83	0.381738	0.389	0.134	3.99194e-79	Treg
CD3D	1.27452e-78	0.387128	0.666	0.345	2.22608e-74	Treg
CD52	9.84699e-76	0.455768	0.927	0.713	1.71988e-71	Treg
ARL4C	1.87665e-56	0.25072	0.402	0.177	3.27776e-52	Treg
CORO1B	3.72448e-56	0.276546	0.359	0.152	6.50518e-52	Treg
PIM2	1.45124e-52	0.30241	0.275	0.099	2.53474e-48	Treg
CRIP1	1.60059e-46	0.331477	0.517	0.289	2.79559e-42	Treg
TRBC2	1.66555e-44	0.264347	0.453	0.23	2.90905e-40	Treg
TRBC1	3.85915e-44	0.286895	0.408	0.2	6.74039e-40	Treg
HSPA8	7.24598e-37	0.281895	0.689	0.49	1.26558e-32	Treg
ISG20	1.00807e-36	0.296513	0.59	0.385	1.7607e-32	Treg
MYL12A	7.43154e-31	0.265652	0.808	0.673	1.29799e-26	Treg
KLRB1	0	1.05968	0.731	0.229	0	CD4
IL7R	0	0.627945	0.621	0.201	0	CD4
RPS12	0	0.621304	1	0.994	0	CD4
RPS18	0	0.617533	1	0.996	0	CD4
RPS6	0	0.616404	1	0.99	0	CD4
RPL32	0	0.591905	1	0.997	0	CD4
RPL3	0	0.58307	0.999	0.97	0	CD4
RPL13	0	0.582463	1	0.999	0	CD4
RPS27A	0	0.577757	1	0.996	0	CD4
RPSA	0	0.554585	0.987	0.83	0	CD4
RPL10	0	0.553774	1	0.999	0	CD4
RPS27	0	0.546157	1	1	0	CD4
RPL34	0	0.541648	1	0.999	0	CD4
RPS4X	0	0.528421	1	0.981	0	CD4
RPL12	0	0.523355	1	0.989	0	CD4
RPL13A	0	0.514252	1	0.998	0	CD4
RPS15A	0	0.510963	1	0.995	0	CD4
RPL18A	0	0.503916	1	0.995	0	CD4
RPL5	0	0.502986	0.984	0.866	0	CD4
RPL14	0	0.502715	0.999	0.957	0	CD4
EEF1A1	0	0.500697	1	0.997	0	CD4
RPL23A	0	0.49898	1	0.984	0	CD4
RPS3	0	0.493699	1	0.984	0	CD4
RPL30	0	0.492179	0.999	0.986	0	CD4
RPS25	0	0.492025	1	0.987	0	CD4
RPL21	0	0.491644	1	0.999	0	CD4
RPL31	0	0.489577	0.999	0.969	0	CD4
RPL11	0	0.485559	1	0.995	0	CD4
RPL10A	0	0.484793	0.998	0.945	0	CD4
RPS29	0	0.478696	0.999	0.991	0	CD4
RPS3A	0	0.476919	1	0.991	0	CD4
RPLP1	0	0.475599	1	0.999	0	CD4
RPS2	0	0.468068	1	0.996	0	CD4
RPL19	0	0.465983	1	0.99	0	CD4
RPLP2	0	0.455237	1	0.997	0	CD4
RPLP0	0	0.454938	0.97	0.86	0	CD4
RPL6	0	0.452786	0.998	0.96	0	CD4
LTB	0	0.448828	0.808	0.327	0	CD4
RPS5	0	0.447747	0.996	0.921	0	CD4
RPS19	0	0.447317	1	0.997	0	CD4
RPL36	0	0.439936	1	0.987	0	CD4
RPL9	0	0.436991	0.999	0.988	0	CD4
RPS14	0	0.431112	1	0.998	0	CD4
RPL41	0	0.429927	1	1	0	CD4
RPL35	0	0.424058	0.999	0.985	0	CD4
RPL35A	0	0.423868	0.999	0.99	0	CD4
RPL7	0	0.422535	1	0.987	0	CD4
RPL27A	0	0.420338	1	0.992	0	CD4
RPS23	0	0.415951	1	0.989	0	CD4
RPL18	0	0.414632	0.998	0.963	0	CD4
RPL39	0	0.403908	1	0.999	0	CD4
RPS8	0	0.401206	1	0.991	0	CD4
RPS21	0	0.400456	0.996	0.955	0	CD4
RPS16	0	0.398477	0.998	0.985	0	CD4
RPL26	0	0.393803	1	0.994	0	CD4
RPS7	0	0.388268	0.998	0.961	0	CD4
RPS15	0	0.385058	1	0.998	0	CD4
RPL29	0	0.380884	0.997	0.974	0	CD4
RPL22	0	0.379398	0.987	0.921	0	CD4
RPL37	0	0.37753	0.999	0.988	0	CD4
RPS28	0	0.377029	0.999	0.999	0	CD4
RPL24	0	0.371594	0.993	0.943	0	CD4
EEF1D	0	0.36252	0.981	0.896	0	CD4
RPL8	0	0.357598	0.999	0.984	0	CD4
RPL7A	4.27079e-303	0.35926	0.985	0.914	7.45937e-299	CD4
RPS13	1.98862e-296	0.35617	0.999	0.99	3.47333e-292	CD4
RPL4	1.74224e-280	0.410867	0.925	0.777	3.043e-276	CD4
EEF1B2	4.85795e-264	0.399335	0.89	0.718	8.4849e-260	CD4
RPL15	2.61186e-263	0.312844	0.999	0.985	4.56187e-259	CD4
RPL38	1.46671e-260	0.353544	0.995	0.967	2.56175e-256	CD4
RPL27	2.1221e-255	0.321479	0.997	0.975	3.70645e-251	CD4
RACK1	1.38286e-247	0.320399	0.985	0.921	2.4153e-243	CD4
RPS20	1.43512e-235	0.288349	0.997	0.978	2.50657e-231	CD4
RPL36A	5.01319e-231	0.392554	0.916	0.799	8.75603e-227	CD4
LDHB	5.676e-222	0.347497	0.579	0.29	9.9137e-218	CD4
RPL37A	1.57977e-209	0.291587	0.999	0.99	2.75922e-205	CD4
NACA	3.12556e-209	0.290061	0.974	0.91	5.45911e-205	CD4
RPS26	2.00937e-208	0.40884	0.944	0.911	3.50956e-204	CD4
NPM1	1.15834e-206	0.328653	0.816	0.592	2.02316e-202	CD4
RPL28	6.28512e-205	0.303173	1	0.998	1.09776e-200	CD4
RPS17	5.81999e-194	0.372305	0.882	0.761	1.01652e-189	CD4
EIF3E	1.8563e-189	0.322143	0.719	0.482	3.24221e-185	CD4
NOP53	4.69404e-184	0.334052	0.594	0.35	8.19861e-180	CD4
RPL17	5.74781e-172	0.342586	0.775	0.569	1.00391e-167	CD4
RPS10	3.35919e-157	0.348417	0.902	0.8	5.86716e-153	CD4
TOMM7	1.16542e-144	0.267652	0.88	0.749	2.03552e-140	CD4
EEF2	3.81023e-106	0.264857	0.679	0.516	6.65494e-102	CD4
NBEAL1	3.09002e-94	0.261101	0.462	0.291	5.39703e-90	CD4
CD3G	2.1492e-88	0.252421	0.387	0.213	3.75378e-84	CD4
C16orf54	1.19366e-59	0.27	0.259	0.14	2.08485e-55	CD4
C1orf56	3.28563e-32	0.36983	0.38	0.274	5.73869e-28	CD4
CDC42SE1	1.22811e-06	0.312	0.346	0.316	0.0214502	CD4
MS4A1	0	1.24748	0.763	0.002	0	naiveBc
CD79A	0	1.22873	0.729	0.008	0	naiveBc
IGHD	0	1.00362	0.475	0	0	naiveBc
BANK1	0	0.794138	0.593	0.011	0	naiveBc
LINC00926	0	0.664866	0.542	0.002	0	naiveBc
VPREB3	0	0.604349	0.39	0	0	naiveBc
TNFRSF13C	0	0.525023	0.39	0.002	0	naiveBc
TNFRSF13B	0	0.440664	0.407	0.003	0	naiveBc
CD24	0	0.398575	0.254	0.001	0	naiveBc
BLK	0	0.395318	0.424	0.004	0	naiveBc
LINC02397	0	0.385272	0.356	0.003	0	naiveBc
FCRLA	0	0.341058	0.271	0	0	naiveBc
CD19	0	0.290523	0.305	0.001	0	naiveBc
IGLC2	5.494e-281	1.79445	0.407	0.006	9.59583e-277	naiveBc
IGHM	7.60083e-208	1.19607	0.407	0.008	1.32756e-203	naiveBc
PNOC	1.10612e-204	0.301146	0.271	0.003	1.93196e-200	naiveBc
CD22	1.61546e-200	0.262193	0.271	0.003	2.82156e-196	naiveBc
IGLC3	4.99928e-193	0.802736	0.288	0.004	8.73174e-189	naiveBc
RALGPS2	5.53895e-188	0.3462	0.356	0.007	9.67433e-184	naiveBc
PDLIM1	5.57331e-182	0.465294	0.407	0.009	9.73435e-178	naiveBc
IGHA1	1.16361e-124	0.787612	0.254	0.005	2.03237e-120	naiveBc
CD79B	2.58992e-124	0.703452	0.576	0.03	4.52356e-120	naiveBc
SPIB	3.9947e-100	0.362861	0.322	0.011	6.97715e-96	naiveBc
BLNK	1.76876e-83	0.25773	0.254	0.008	3.08932e-79	naiveBc
P2RX5	3.98114e-81	0.382795	0.339	0.016	6.95346e-77	naiveBc
AIM2	5.56332e-81	0.311455	0.356	0.017	9.7169e-77	naiveBc
LY86	7.45387e-64	0.550043	0.61	0.065	1.30189e-59	naiveBc
HVCN1	1.14499e-55	0.261525	0.288	0.017	1.99984e-51	naiveBc
BCL11A	8.92468e-55	0.374645	0.373	0.028	1.55879e-50	naiveBc
TCF4	1.42863e-38	0.280022	0.373	0.038	2.49524e-34	naiveBc
IFT57	9.22178e-38	0.297512	0.322	0.03	1.61068e-33	naiveBc
HLA-DQA1	1.12482e-37	0.830627	0.729	0.151	1.96461e-33	naiveBc
IRF8	1.26103e-36	0.320832	0.407	0.048	2.20251e-32	naiveBc
CLECL1	2.89225e-34	0.297829	0.305	0.03	5.0516e-30	naiveBc
HLA-DQB1	2.34541e-28	0.774767	0.78	0.228	4.0965e-24	naiveBc
CYB561A3	8.86614e-28	0.257397	0.288	0.032	1.54856e-23	naiveBc
IGKC	2.10538e-27	1.11396	0.339	0.047	3.67725e-23	naiveBc
HLA-DPB1	4.42326e-26	1.07722	0.949	0.429	7.72566e-22	naiveBc
CD74	8.58691e-26	1.2387	1	0.592	1.49979e-21	naiveBc
POU2F2	1.4962e-24	0.43297	0.492	0.097	2.61327e-20	naiveBc
HLA-DPA1	1.8312e-24	1.02321	0.864	0.374	3.19837e-20	naiveBc
CD82	1.78624e-23	0.288574	0.322	0.046	3.11985e-19	naiveBc
TPD52	2.77779e-23	0.260396	0.305	0.042	4.85169e-19	naiveBc
SMIM14	1.29811e-22	0.432458	0.39	0.069	2.26728e-18	naiveBc
ARHGAP24	1.67739e-22	0.329386	0.339	0.053	2.92972e-18	naiveBc
HLA-DRA	4.90234e-22	1.05455	0.983	0.516	8.56243e-18	naiveBc
BCAS4	2.18302e-21	0.292875	0.339	0.052	3.81286e-17	naiveBc
HSH2D	3.63993e-21	0.284932	0.288	0.041	6.35751e-17	naiveBc
MEF2C	2.41622e-19	0.479338	0.542	0.14	4.22017e-15	naiveBc
HLA-DRB1	7.67639e-19	0.982261	0.864	0.411	1.34076e-14	naiveBc
STX7	2.14521e-18	0.266283	0.424	0.09	3.74683e-14	naiveBc
BIRC3	3.29871e-18	0.383357	0.424	0.095	5.76153e-14	naiveBc
SEL1L3	3.70407e-18	0.281471	0.288	0.047	6.46953e-14	naiveBc
RPS11	6.29487e-18	0.556867	0.983	0.944	1.09946e-13	naiveBc
SCIMP	9.78409e-18	0.424805	0.339	0.065	1.70889e-13	naiveBc
HLA-DMA	4.39347e-17	0.434969	0.627	0.195	7.67364e-13	naiveBc
CD37	1.9447e-16	0.786975	0.729	0.368	3.39661e-12	naiveBc
SYPL1	5.79015e-16	0.26868	0.373	0.082	1.01131e-11	naiveBc
EEF2	9.87838e-15	0.632634	0.881	0.567	1.72536e-10	naiveBc
PTPN6	3.70786e-14	0.286056	0.424	0.112	6.47614e-10	naiveBc
HLA-DMB	4.15557e-13	0.321372	0.424	0.118	7.25812e-09	naiveBc
LTB	6.64467e-13	0.50597	0.898	0.48	1.16056e-08	naiveBc
ACP5	7.85403e-13	0.281087	0.271	0.057	1.37178e-08	naiveBc
SMARCB1	2.65272e-12	0.265977	0.305	0.072	4.63324e-08	naiveBc
RPS8	3.82517e-12	0.446512	1	0.994	6.68105e-08	naiveBc
RPS5	1.40088e-11	0.436182	1	0.945	2.44678e-07	naiveBc
CTSH	3.68577e-11	0.340467	0.475	0.166	6.43756e-07	naiveBc
SNX2	8.2062e-11	0.296925	0.356	0.105	1.4333e-06	naiveBc
EEF1A1	1.32925e-10	0.428675	1	0.998	2.32167e-06	naiveBc
SP110	1.62543e-10	0.304773	0.576	0.225	2.83897e-06	naiveBc
RPL13A	4.0582e-10	0.382041	1	0.999	7.08805e-06	naiveBc
CD52	4.77482e-10	0.496174	1	0.725	8.33971e-06	naiveBc
RPL18A	5.77624e-10	0.372159	1	0.997	1.00888e-05	naiveBc
PARP1	1.44091e-09	0.285057	0.39	0.131	2.51669e-05	naiveBc
RPS20	1.46309e-09	0.383925	1	0.984	2.55543e-05	naiveBc
AC004687.1	3.04818e-09	0.418133	0.559	0.262	5.32396e-05	naiveBc
BTG1	3.44747e-09	0.364127	0.847	0.481	6.02135e-05	naiveBc
RPS23	5.37566e-09	0.386308	1	0.993	9.38912e-05	naiveBc
RPL23A	3.18259e-08	0.32291	1	0.989	0.000555871	naiveBc
GDI2	5.48201e-08	0.260694	0.458	0.187	0.000957487	naiveBc
RPL8	1.35311e-07	0.277542	1	0.989	0.00236333	naiveBc
LIMD2	3.70651e-07	0.309994	0.593	0.307	0.0064738	naiveBc
SELL	4.93354e-07	0.26891	0.39	0.159	0.00861692	naiveBc
RPL27A	7.50894e-07	0.284393	1	0.995	0.0131151	naiveBc
HERPUD1	1.01773e-06	0.314842	0.492	0.231	0.0177757	naiveBc
RPL4	1.78849e-06	0.357849	0.966	0.824	0.0312377	naiveBc
RPS6	2.23633e-06	0.254029	1	0.993	0.0390598	naiveBc
IGLC3	0	4.25452	0.426	0.003	0	plasma
IGHG1	0	3.57611	0.934	0.004	0	plasma
JCHAIN	0	3.57341	1	0.015	0	plasma
IGHGP	0	3.20579	0.902	0.002	0	plasma
IGHG3	0	3.01402	0.951	0.004	0	plasma
IGHA1	0	2.70303	0.738	0.003	0	plasma
MZB1	0	2.20726	0.984	0.016	0	plasma
IGLL5	0	2.13215	0.41	0.001	0	plasma
IGLC6	0	1.2914	0.361	0	0	plasma
IGHG2	0	1.26747	0.328	0.001	0	plasma
IGLL1	0	1.26253	0.377	0.002	0	plasma
DERL3	0	0.984754	0.705	0.004	0	plasma
CD79A	0	0.890122	0.77	0.008	0	plasma
POU2AF1	0	0.783786	0.787	0.003	0	plasma
IGLC7	0	0.717195	0.279	0	0	plasma
MYBL2	0	0.583743	0.557	0.006	0	plasma
TNFRSF17	0	0.579494	0.492	0.001	0	plasma
IGLC5	0	0.561792	0.311	0	0	plasma
PDLIM1	0	0.542245	0.557	0.009	0	plasma
PKHD1L1	0	0.420828	0.426	0.001	0	plasma
SDC1	0	0.410833	0.361	0	0	plasma
IGLV6-57	0	0.410506	0.262	0	0	plasma
CAV1	0	0.388772	0.41	0	0	plasma
IGHG4	0	0.366055	0.262	0	0	plasma
AC104699.1	0	0.342657	0.361	0.001	0	plasma
AC012236.1	0	0.258247	0.279	0	0	plasma
TNFRSF13B	1.08589e-288	0.362387	0.328	0.003	1.89661e-284	plasma
GGH	1.18883e-277	0.422829	0.492	0.009	2.0764e-273	plasma
TK1	2.61117e-231	0.469409	0.508	0.012	4.56067e-227	plasma
IGKC	1.01841e-215	4.81941	0.869	0.044	1.77875e-211	plasma
RRM2	6.65769e-198	0.572377	0.525	0.015	1.16283e-193	plasma
BIRC5	3.43439e-197	0.491167	0.525	0.015	5.99851e-193	plasma
BHLHE41	3.32471e-181	0.334043	0.361	0.008	5.80693e-177	plasma
CDKN3	2.36478e-168	0.453879	0.492	0.016	4.13033e-164	plasma
TENT5C	4.95128e-157	0.577402	0.508	0.019	8.6479e-153	plasma
MKI67	7.98974e-156	0.537448	0.541	0.021	1.39549e-151	plasma
SLC25A4	3.39945e-154	0.390475	0.361	0.009	5.93747e-150	plasma
CENPW	7.99632e-145	0.486071	0.574	0.026	1.39664e-140	plasma
IRF4	2.34283e-142	0.434542	0.443	0.015	4.09199e-138	plasma
CENPA	1.42973e-130	0.301454	0.262	0.006	2.49717e-126	plasma
RASGRP3	6.74361e-127	0.384023	0.393	0.014	1.17784e-122	plasma
ELL2	2.30336e-124	0.436445	0.525	0.025	4.02305e-120	plasma
PTTG1	9.61868e-123	0.634692	0.689	0.045	1.68e-118	plasma
PCLAF	6.56e-117	1.01262	0.738	0.055	1.14577e-112	plasma
TPD52	8.7476e-117	0.519811	0.639	0.04	1.52786e-112	plasma
UBE2J1	1.85921e-108	1.02094	0.934	0.106	3.24729e-104	plasma
SPATS2	1.3346e-106	0.479185	0.557	0.034	2.33102e-102	plasma
BLNK	1.13471e-103	0.250034	0.279	0.008	1.98189e-99	plasma
TYMS	2.35953e-102	0.359559	0.426	0.02	4.12116e-98	plasma
NUSAP1	3.9873e-98	0.349814	0.426	0.021	6.96421e-94	plasma
SHCBP1	4.64983e-95	0.259298	0.311	0.011	8.1214e-91	plasma
CD320	3.26438e-92	0.502698	0.623	0.049	5.70157e-88	plasma
STMN1	5.04174e-91	0.679299	0.672	0.057	8.8059e-87	plasma
SEC11C	8.92334e-91	1.38974	0.984	0.163	1.55855e-86	plasma
CTNNAL1	1.222e-90	0.282055	0.328	0.013	2.13434e-86	plasma
GCSH	3.3183e-89	0.374184	0.443	0.025	5.79575e-85	plasma
LRRC59	1.22883e-82	0.489961	0.607	0.051	2.14627e-78	plasma
GMNN	1.75603e-80	0.3333	0.377	0.02	3.06708e-76	plasma
VOPP1	2.25642e-80	0.601055	0.738	0.079	3.94107e-76	plasma
DHFR	1.05054e-79	0.368232	0.443	0.028	1.83488e-75	plasma
NME1	1.12988e-79	0.892564	0.82	0.107	1.97345e-75	plasma
PLPP5	4.66997e-77	0.411957	0.508	0.038	8.15656e-73	plasma
CENPU	3.66968e-75	0.277955	0.328	0.016	6.40945e-71	plasma
CENPM	7.06071e-75	0.360273	0.41	0.026	1.23322e-70	plasma
MYDGF	7.57105e-75	1.05595	0.934	0.162	1.32236e-70	plasma
CCNA2	3.9745e-74	0.290157	0.295	0.013	6.94186e-70	plasma
GTSE1	1.00372e-73	0.256799	0.279	0.012	1.7531e-69	plasma
TMEM106C	1.82137e-72	0.375449	0.459	0.033	3.18121e-68	plasma
CCDC34	5.69755e-72	0.275231	0.344	0.019	9.95134e-68	plasma
UBE2S	8.13793e-71	0.52747	0.492	0.04	1.42137e-66	plasma
HELLS	6.21578e-70	0.385277	0.475	0.036	1.08565e-65	plasma
PIM2	2.14183e-68	0.878078	0.787	0.106	3.74091e-64	plasma
PHF19	4.2295e-68	0.45474	0.475	0.038	7.38724e-64	plasma
SELENOS	1.11036e-67	0.885546	0.902	0.155	1.93936e-63	plasma
CD79B	1.4463e-66	0.354969	0.426	0.031	2.52611e-62	plasma
SRM	2.52556e-66	0.412113	0.475	0.039	4.41115e-62	plasma
GINS2	2.56076e-64	0.268578	0.279	0.014	4.47262e-60	plasma
HMGB3	7.25546e-64	0.302855	0.295	0.016	1.26724e-59	plasma
CKS1B	4.49122e-61	0.543255	0.541	0.055	7.84436e-57	plasma
CMSS1	8.98796e-61	0.389807	0.459	0.039	1.56984e-56	plasma
TXNDC11	1.93935e-60	0.369816	0.393	0.029	3.38727e-56	plasma
SNRNP25	8.50332e-60	0.455968	0.574	0.062	1.48519e-55	plasma
LRR1	9.25981e-60	0.387996	0.41	0.032	1.61732e-55	plasma
KDELR2	4.25596e-59	0.748769	0.918	0.18	7.43345e-55	plasma
CLPTM1L	2.23383e-58	0.345305	0.459	0.041	3.90161e-54	plasma
SDF2L1	2.87463e-58	0.960657	0.934	0.204	5.02082e-54	plasma
LMAN1	8.58487e-58	0.603501	0.689	0.094	1.49943e-53	plasma
NXPE3	2.61307e-57	0.361371	0.426	0.036	4.56398e-53	plasma
CRELD2	4.9421e-57	0.426104	0.574	0.064	8.63187e-53	plasma
HIST1H1C	5.35177e-57	0.530759	0.426	0.037	9.3474e-53	plasma
FKBP11	9.32493e-57	0.864634	0.836	0.149	1.62869e-52	plasma
HSP90B1	4.77946e-55	1.3706	0.951	0.254	8.3478e-51	plasma
GNL3	1.42647e-53	0.390926	0.574	0.067	2.49148e-49	plasma
EAF2	3.43274e-53	0.370688	0.361	0.028	5.99563e-49	plasma
CLSPN	1.02232e-51	0.343796	0.361	0.029	1.78558e-47	plasma
RNASEH1	4.53159e-51	0.342104	0.459	0.046	7.91488e-47	plasma
STOML2	3.25542e-50	0.618016	0.672	0.104	5.68591e-46	plasma
HMGA1	2.32373e-49	0.909172	0.705	0.122	4.05863e-45	plasma
MRPL12	6.52155e-49	0.501959	0.574	0.077	1.13905e-44	plasma
RPL22L1	7.85327e-49	0.717674	0.852	0.181	1.37165e-44	plasma
CXXC5	1.88983e-48	0.263617	0.344	0.028	3.30078e-44	plasma
CYCS	9.92771e-48	0.93474	0.852	0.206	1.73397e-43	plasma
DEF8	1.78914e-47	0.371393	0.459	0.05	3.12491e-43	plasma
ISOC2	5.9697e-47	0.35996	0.459	0.05	1.04267e-42	plasma
GSTP1	5.85431e-46	1.20438	0.918	0.268	1.02251e-41	plasma
ATP5MC1	1.00506e-45	0.789466	0.787	0.169	1.75544e-41	plasma
SMC2	2.76811e-45	0.312498	0.393	0.038	4.83478e-41	plasma
SPCS3	5.20688e-45	0.756307	0.803	0.173	9.09434e-41	plasma
HIST1H4C	1.28404e-44	2.38459	0.787	0.187	2.2427e-40	plasma
CDK4	1.02377e-43	0.348488	0.443	0.05	1.78812e-39	plasma
XBP1	5.02172e-43	1.4297	0.852	0.226	8.77093e-39	plasma
PDCD5	5.4591e-43	0.707733	0.787	0.173	9.53487e-39	plasma
MAD2L1	7.12946e-43	0.295524	0.361	0.034	1.24523e-38	plasma
CKS2	1.95976e-42	0.536294	0.525	0.074	3.42291e-38	plasma
CCDC50	3.29404e-42	0.351997	0.459	0.055	5.75336e-38	plasma
C19orf48	1.30152e-41	0.287161	0.344	0.032	2.27324e-37	plasma
POP7	1.90915e-41	0.394577	0.508	0.069	3.33453e-37	plasma
TOR3A	2.29269e-41	0.263143	0.344	0.032	4.00441e-37	plasma
DTYMK	2.54758e-41	0.297733	0.393	0.041	4.44961e-37	plasma
EBNA1BP2	2.71626e-41	0.332022	0.41	0.045	4.74422e-37	plasma
FAM3C	5.6452e-41	0.327507	0.426	0.049	9.85991e-37	plasma
MRPS15	1.32671e-40	0.471866	0.689	0.125	2.31723e-36	plasma
CCNC	1.43433e-40	0.401561	0.59	0.091	2.5052e-36	plasma
POLE3	2.75097e-40	0.403026	0.574	0.088	4.80484e-36	plasma
SEC61B	4.43146e-40	1.11967	0.967	0.471	7.73999e-36	plasma
ITM2C	1.31351e-39	0.488533	0.475	0.062	2.29418e-35	plasma
MANF	1.52255e-39	0.629569	0.705	0.14	2.65929e-35	plasma
SEL1L3	1.81574e-39	0.318229	0.41	0.046	3.17137e-35	plasma
TXNL4A	4.07795e-39	0.561083	0.689	0.136	7.12255e-35	plasma
RRBP1	6.4569e-39	0.616743	0.623	0.111	1.12776e-34	plasma
PRDX4	6.93929e-39	0.466241	0.475	0.065	1.21202e-34	plasma
AURKAIP1	7.90265e-39	0.666978	0.852	0.23	1.38028e-34	plasma
CYC1	2.09778e-38	0.508535	0.607	0.106	3.66398e-34	plasma
SUB1	3.53412e-38	1.54014	0.984	0.626	6.17269e-34	plasma
DNAJC9	3.86105e-38	0.295551	0.393	0.045	6.7437e-34	plasma
SSRP1	4.94747e-38	0.34196	0.475	0.064	8.64124e-34	plasma
FAM136A	7.30641e-38	0.387742	0.508	0.074	1.27614e-33	plasma
ZNF706	7.49189e-38	0.815778	0.918	0.297	1.30853e-33	plasma
PDIA6	9.04009e-38	0.536445	0.852	0.197	1.57894e-33	plasma
DCPS	9.74302e-38	0.264962	0.311	0.029	1.70172e-33	plasma
SSR3	1.18961e-37	0.678641	0.902	0.24	2.07778e-33	plasma
BOLA3	2.81881e-37	0.519674	0.623	0.114	4.92334e-33	plasma
RPA3	4.02574e-37	0.517881	0.672	0.13	7.03136e-33	plasma
MTDH	4.0622e-37	1.04286	0.885	0.306	7.09504e-33	plasma
ATP5PF	3.16831e-36	0.871609	0.934	0.367	5.53376e-32	plasma
ODC1	1.25516e-35	0.267262	0.295	0.028	2.19225e-31	plasma
UQCRH	1.6331e-35	1.03987	0.934	0.47	2.85237e-31	plasma
UFM1	2.08015e-35	0.489026	0.721	0.153	3.63319e-31	plasma
LMAN2	2.17941e-35	0.51365	0.721	0.157	3.80656e-31	plasma
H2AFV	2.60671e-35	0.68363	0.82	0.232	4.55289e-31	plasma
CCDC167	3.4067e-35	0.48397	0.721	0.155	5.95014e-31	plasma
FABP5	7.34759e-35	0.799978	0.639	0.134	1.28333e-30	plasma
POLD2	1.0426e-34	0.289163	0.361	0.041	1.82101e-30	plasma
H2AFZ	3.4334e-34	1.41466	0.869	0.352	5.99678e-30	plasma
PEBP1	3.61335e-34	0.576138	0.738	0.176	6.31107e-30	plasma
CBX5	6.22973e-34	0.362828	0.475	0.071	1.08808e-29	plasma
PARP1	1.52371e-33	0.504704	0.639	0.13	2.66131e-29	plasma
UQCRQ	1.71765e-33	0.88832	0.934	0.417	3.00005e-29	plasma
SPCS2	4.94702e-33	0.710089	0.885	0.287	8.64047e-29	plasma
TIMM10	6.51224e-33	0.46849	0.623	0.126	1.13743e-28	plasma
TDG	1.00556e-32	0.407252	0.541	0.095	1.75631e-28	plasma
RANBP1	2.0558e-32	0.914036	0.705	0.197	3.59066e-28	plasma
MRPL14	2.08154e-32	0.510709	0.689	0.155	3.63563e-28	plasma
DUT	2.27108e-32	0.76694	0.656	0.154	3.96667e-28	plasma
ELP5	3.32683e-32	0.282999	0.377	0.048	5.81064e-28	plasma
TMED9	3.71767e-32	0.462283	0.59	0.115	6.49329e-28	plasma
ATP5MC3	3.79729e-32	0.967302	0.869	0.341	6.63234e-28	plasma
MLEC	4.19638e-32	0.379149	0.492	0.08	7.3294e-28	plasma
IMP4	4.55872e-32	0.30736	0.459	0.069	7.96226e-28	plasma
PPIB	4.93372e-32	0.939374	0.852	0.308	8.61723e-28	plasma
SLC35B1	1.53455e-31	0.290281	0.426	0.061	2.68025e-27	plasma
SMARCB1	1.65271e-31	0.368423	0.459	0.071	2.88662e-27	plasma
MRPS34	4.4196e-31	0.422618	0.656	0.14	7.71928e-27	plasma
C1QBP	7.42727e-31	0.493654	0.639	0.142	1.29725e-26	plasma
HMGN2	1.28101e-30	0.984035	0.869	0.343	2.23741e-26	plasma
HMGN3	2.44902e-30	0.506986	0.721	0.179	4.27746e-26	plasma
SEC14L1	3.90813e-30	0.344749	0.525	0.093	6.82593e-26	plasma
HSPE1	5.66488e-30	0.767415	0.803	0.257	9.89427e-26	plasma
NDUFAF8	9.38963e-30	0.541906	0.639	0.148	1.63999e-25	plasma
IDH2	1.29537e-29	0.591768	0.672	0.165	2.26249e-25	plasma
MRPL23	1.32916e-29	0.482648	0.705	0.175	2.32152e-25	plasma
PRDX2	1.88421e-29	0.461805	0.623	0.136	3.29097e-25	plasma
ANP32E	5.9941e-29	0.542031	0.656	0.153	1.04693e-24	plasma
RBM17	9.41597e-29	0.408626	0.607	0.13	1.64459e-24	plasma
DNAJC15	1.00851e-28	0.465622	0.689	0.17	1.76147e-24	plasma
MZT2B	1.65389e-28	0.65279	0.918	0.328	2.88869e-24	plasma
PDIA4	1.80308e-28	0.571431	0.541	0.11	3.14927e-24	plasma
TOMM5	2.52265e-28	0.42204	0.59	0.126	4.40606e-24	plasma
SNU13	4.05115e-28	0.510342	0.852	0.256	7.07575e-24	plasma
CNPY2	5.85834e-28	0.450587	0.607	0.136	1.02322e-23	plasma
MRPL52	8.3449e-28	0.546093	0.738	0.208	1.45752e-23	plasma
PRDX5	8.42961e-28	0.477562	0.787	0.22	1.47232e-23	plasma
USP1	8.95242e-28	0.357889	0.492	0.09	1.56363e-23	plasma
SELENOK	1.38724e-27	0.526989	0.738	0.204	2.42296e-23	plasma
TCF4	2.70618e-27	0.258722	0.311	0.039	4.72661e-23	plasma
FXN	3.11988e-27	0.250886	0.328	0.043	5.44918e-23	plasma
ANAPC5	4.08855e-27	0.41889	0.557	0.118	7.14106e-23	plasma
GANAB	6.66677e-27	0.27241	0.344	0.048	1.16442e-22	plasma
NHP2	9.03003e-27	0.511043	0.705	0.193	1.57718e-22	plasma
CHCHD2	9.20333e-27	0.848851	0.934	0.645	1.60745e-22	plasma
MRPL40	9.32569e-27	0.273861	0.377	0.056	1.62883e-22	plasma
NDUFV2	1.77951e-26	0.461788	0.77	0.217	3.1081e-22	plasma
TMED2	2.67909e-26	0.506487	0.803	0.241	4.6793e-22	plasma
NDUFS6	3.14994e-26	0.546263	0.803	0.259	5.50168e-22	plasma
TIMM13	4.68393e-26	0.460589	0.705	0.188	8.18095e-22	plasma
PRELID1	6.37632e-26	0.731967	0.869	0.384	1.11369e-21	plasma
TXN	6.42386e-26	0.839459	0.836	0.36	1.12199e-21	plasma
EIF2S2	7.20965e-26	0.542683	0.77	0.238	1.25924e-21	plasma
TMPO	7.49277e-26	0.340555	0.443	0.077	1.30869e-21	plasma
SNRPD1	1.82113e-25	0.602065	0.721	0.218	3.18078e-21	plasma
SNRPC	2.03001e-25	0.383754	0.525	0.11	3.54562e-21	plasma
EIF1AX	2.80911e-25	0.546614	0.705	0.211	4.90638e-21	plasma
ISCU	3.2819e-25	0.469431	0.721	0.202	5.73217e-21	plasma
RAN	4.94895e-25	0.806595	0.803	0.306	8.64384e-21	plasma
TMA16	5.34414e-25	0.256392	0.344	0.05	9.33407e-21	plasma
SEC61A1	6.8721e-25	0.306447	0.41	0.07	1.20028e-20	plasma
MRPL36	9.91002e-25	0.358261	0.475	0.094	1.73088e-20	plasma
SLIRP	1.05614e-24	0.573026	0.77	0.252	1.84465e-20	plasma
PHB	1.2379e-24	0.326644	0.508	0.104	2.16212e-20	plasma
SMC4	1.61933e-24	0.351304	0.459	0.087	2.82832e-20	plasma
MIF-AS1	1.74625e-24	0.29563	0.426	0.075	3.05e-20	plasma
LSM7	2.55948e-24	0.528706	0.754	0.25	4.47038e-20	plasma
EMC6	2.80312e-24	0.370644	0.574	0.133	4.89592e-20	plasma
RPL26L1	4.3708e-24	0.29983	0.459	0.087	7.63403e-20	plasma
SEC63	5.41372e-24	0.314398	0.443	0.082	9.4556e-20	plasma
SPCS1	5.84165e-24	0.636893	0.82	0.315	1.0203e-19	plasma
HINT2	7.08062e-24	0.319334	0.492	0.1	1.2367e-19	plasma
EIF5A	1.05574e-23	0.681907	0.787	0.292	1.84395e-19	plasma
EIF5	1.0928e-23	0.480178	0.705	0.209	1.90868e-19	plasma
RPS6KB2	1.53106e-23	0.275991	0.426	0.078	2.67415e-19	plasma
MRPL51	1.96012e-23	0.465554	0.705	0.206	3.42354e-19	plasma
ZNF593	2.53287e-23	0.324652	0.443	0.086	4.4239e-19	plasma
ATAD2	3.31535e-23	0.265431	0.279	0.037	5.79058e-19	plasma
COX5A	4.16466e-23	0.544935	0.803	0.288	7.27399e-19	plasma
PCNA	4.35709e-23	0.254687	0.311	0.045	7.61009e-19	plasma
SQLE	4.3637e-23	0.255771	0.328	0.049	7.62163e-19	plasma
ARID3A	4.58492e-23	0.294126	0.41	0.074	8.00802e-19	plasma
RNASEH2C	5.77489e-23	0.357815	0.607	0.15	1.00864e-18	plasma
LSM5	5.89129e-23	0.534304	0.77	0.27	1.02897e-18	plasma
ERH	6.65332e-23	0.611868	0.77	0.282	1.16207e-18	plasma
ISG20	1.06071e-22	0.677688	0.902	0.395	1.85263e-18	plasma
PRDX1	1.26539e-22	0.484023	0.656	0.181	2.21014e-18	plasma
TSEN15	1.27511e-22	0.251053	0.344	0.055	2.22711e-18	plasma
ANAPC11	1.33415e-22	0.479524	0.738	0.236	2.33022e-18	plasma
CD27	1.36268e-22	0.482226	0.574	0.139	2.38006e-18	plasma
PDAP1	2.29404e-22	0.350786	0.541	0.126	4.00677e-18	plasma
RALY	2.90235e-22	0.358356	0.574	0.14	5.06925e-18	plasma
ERLEC1	3.89305e-22	0.353445	0.459	0.095	6.79959e-18	plasma
NAA38	5.14851e-22	0.424922	0.754	0.234	8.99238e-18	plasma
NDUFA6	5.53057e-22	0.462934	0.639	0.188	9.6597e-18	plasma
NDUFB7	5.58252e-22	0.49142	0.82	0.301	9.75042e-18	plasma
JTB	6.69437e-22	0.506514	0.82	0.308	1.16924e-17	plasma
ORAI2	1.05529e-21	0.269024	0.426	0.082	1.84318e-17	plasma
COX6A1	1.37549e-21	0.588972	0.902	0.391	2.40243e-17	plasma
PSMB2	1.89543e-21	0.382564	0.541	0.133	3.31056e-17	plasma
TMEM258	2.43958e-21	0.661216	0.934	0.509	4.26097e-17	plasma
SNRPB	2.52231e-21	0.488555	0.689	0.219	4.40547e-17	plasma
NDUFAB1	2.85454e-21	0.432449	0.607	0.171	4.98574e-17	plasma
UBE2G1	3.13293e-21	0.279696	0.377	0.068	5.47197e-17	plasma
GTF3A	3.40006e-21	0.637727	0.803	0.337	5.93855e-17	plasma
NDUFB6	3.85861e-21	0.341662	0.508	0.118	6.73945e-17	plasma
MRPL57	3.9369e-21	0.471492	0.721	0.241	6.87619e-17	plasma
MRPS16	5.14951e-21	0.345003	0.525	0.126	8.99414e-17	plasma
NDUFB10	6.95108e-21	0.425088	0.77	0.261	1.21408e-16	plasma
DDX39A	9.14584e-21	0.315797	0.377	0.071	1.59741e-16	plasma
ZDHHC12	1.44856e-20	0.29149	0.508	0.117	2.53006e-16	plasma
HMGN1	1.67408e-20	0.631285	0.885	0.422	2.92395e-16	plasma
SRP72	1.82174e-20	0.379962	0.557	0.145	3.18185e-16	plasma
JPT1	2.04339e-20	0.489651	0.639	0.198	3.56899e-16	plasma
FKBP2	3.24762e-20	0.439268	0.656	0.202	5.6723e-16	plasma
MRPS33	3.72208e-20	0.309901	0.525	0.126	6.50098e-16	plasma
TMEM208	7.97081e-20	0.361506	0.475	0.111	1.39218e-15	plasma
TOP1	8.34564e-20	0.295821	0.525	0.126	1.45765e-15	plasma
SNF8	8.62109e-20	0.350031	0.541	0.139	1.50576e-15	plasma
NDUFC1	9.45621e-20	0.433578	0.656	0.206	1.65162e-15	plasma
HMGB2	9.67748e-20	0.85762	0.754	0.32	1.69027e-15	plasma
GTF2A2	1.04369e-19	0.390184	0.639	0.19	1.8229e-15	plasma
SIVA1	1.09154e-19	0.499914	0.672	0.228	1.90648e-15	plasma
MRPL11	2.30671e-19	0.332963	0.492	0.119	4.02889e-15	plasma
PGAM1	2.33757e-19	0.521393	0.738	0.274	4.08279e-15	plasma
HNRNPAB	2.59189e-19	0.30748	0.361	0.068	4.52699e-15	plasma
POLR2L	3.5489e-19	0.583438	0.852	0.401	6.19851e-15	plasma
GTF3C6	4.05194e-19	0.406972	0.639	0.198	7.07712e-15	plasma
CISD1	5.69865e-19	0.266319	0.377	0.075	9.95326e-15	plasma
ALG5	6.73229e-19	0.29955	0.377	0.076	1.17586e-14	plasma
MRPL22	1.03935e-18	0.266848	0.377	0.076	1.81532e-14	plasma
OSTC	1.0476e-18	0.411487	0.689	0.229	1.82973e-14	plasma
YIF1A	1.33526e-18	0.266394	0.377	0.076	2.33216e-14	plasma
CISD2	1.48728e-18	0.405229	0.574	0.166	2.59768e-14	plasma
TOMM22	3.20094e-18	0.366623	0.607	0.182	5.59076e-14	plasma
CD38	3.33735e-18	0.280126	0.377	0.077	5.82902e-14	plasma
EIF3J	3.77529e-18	0.316959	0.525	0.138	6.59393e-14	plasma
RPS2	3.95421e-18	0.691639	0.984	0.997	6.90642e-14	plasma
RPLP0	4.86772e-18	0.664789	0.934	0.895	8.50197e-14	plasma
LSM3	4.86949e-18	0.38192	0.656	0.213	8.50505e-14	plasma
MTCH2	5.64658e-18	0.258781	0.426	0.095	9.86231e-14	plasma
AK6	5.86114e-18	0.265877	0.344	0.067	1.02371e-13	plasma
TIMM17A	6.16177e-18	0.262498	0.41	0.09	1.07621e-13	plasma
SNRPG	6.45366e-18	0.603971	0.787	0.405	1.1272e-13	plasma
NOL7	8.42474e-18	0.346009	0.541	0.15	1.47147e-13	plasma
MRPL55	1.10493e-17	0.280851	0.475	0.117	1.92987e-13	plasma
SEC61G	1.31626e-17	0.591562	0.934	0.579	2.29898e-13	plasma
SNRPE	1.34271e-17	0.493433	0.754	0.31	2.34518e-13	plasma
C12orf75	1.40276e-17	0.377645	0.557	0.16	2.45006e-13	plasma
LSM4	1.6584e-17	0.364392	0.557	0.162	2.89656e-13	plasma
SPTSSA	1.90629e-17	0.254218	0.393	0.085	3.32953e-13	plasma
ITGAE	2.0133e-17	0.339501	0.443	0.11	3.51642e-13	plasma
TIMM8B	2.31264e-17	0.370244	0.705	0.241	4.03926e-13	plasma
IER3IP1	3.09875e-17	0.317292	0.475	0.122	5.41228e-13	plasma
ZBTB38	3.13382e-17	0.295357	0.393	0.087	5.47353e-13	plasma
ANP32B	3.33345e-17	0.459692	0.754	0.293	5.8222e-13	plasma
GADD45GIP1	3.59467e-17	0.405477	0.656	0.224	6.27845e-13	plasma
TMEM147	3.99763e-17	0.322485	0.574	0.168	6.98226e-13	plasma
TMED10	5.73396e-17	0.291063	0.574	0.164	1.00149e-12	plasma
PMVK	6.17606e-17	0.271027	0.41	0.095	1.07871e-12	plasma
MESD	6.60954e-17	0.272279	0.426	0.101	1.15442e-12	plasma
UQCC2	6.90789e-17	0.308773	0.443	0.109	1.20653e-12	plasma
SELENOH	7.23451e-17	0.44262	0.738	0.295	1.26358e-12	plasma
ATP5ME	8.75107e-17	0.494211	0.885	0.44	1.52846e-12	plasma
MEF2C	1.16225e-16	0.372533	0.508	0.14	2.02999e-12	plasma
SNRPF	1.25282e-16	0.520716	0.721	0.295	2.18818e-12	plasma
TCEA1	1.55075e-16	0.34203	0.623	0.201	2.70854e-12	plasma
DCTPP1	1.66014e-16	0.263724	0.295	0.055	2.89961e-12	plasma
ACP1	1.86993e-16	0.331259	0.541	0.158	3.26601e-12	plasma
PSMB6	1.88973e-16	0.366245	0.525	0.154	3.3006e-12	plasma
HSPD1	2.03263e-16	0.33259	0.475	0.127	3.55019e-12	plasma
ANAPC15	2.10672e-16	0.284333	0.393	0.091	3.6796e-12	plasma
HMGB1	2.13786e-16	0.669771	0.885	0.603	3.73398e-12	plasma
DAD1	2.26265e-16	0.382236	0.672	0.232	3.95194e-12	plasma
EMC4	2.35456e-16	0.282697	0.393	0.091	4.11247e-12	plasma
COPE	2.39522e-16	0.459697	0.672	0.249	4.1835e-12	plasma
NDUFC2	2.47431e-16	0.389371	0.672	0.238	4.32163e-12	plasma
MBD2	2.6871e-16	0.272322	0.475	0.123	4.69329e-12	plasma
POLR2F	3.79309e-16	0.317241	0.508	0.144	6.62501e-12	plasma
LAGE3	5.2359e-16	0.267173	0.41	0.099	9.14502e-12	plasma
NCL	5.65169e-16	0.575914	0.705	0.285	9.87124e-12	plasma
MRPL41	6.02807e-16	0.309267	0.672	0.224	1.05286e-11	plasma
CDK2AP2	6.12718e-16	0.348151	0.525	0.155	1.07017e-11	plasma
HAX1	6.65265e-16	0.31481	0.492	0.137	1.16195e-11	plasma
ROMO1	8.50955e-16	0.45086	0.656	0.255	1.48628e-11	plasma
KRT10	8.56373e-16	0.334844	0.623	0.206	1.49574e-11	plasma
NDUFA4	1.09154e-15	0.481554	0.918	0.508	1.90649e-11	plasma
BAG1	1.32241e-15	0.273579	0.426	0.107	2.30972e-11	plasma
CRIP1	1.42367e-15	0.826412	0.672	0.302	2.48659e-11	plasma
MRPL21	1.69903e-15	0.305505	0.41	0.104	2.96753e-11	plasma
UPF3A	2.17295e-15	0.271471	0.41	0.102	3.79527e-11	plasma
RER1	2.28169e-15	0.30351	0.525	0.155	3.98521e-11	plasma
UBE2D2	2.80503e-15	0.37638	0.738	0.286	4.89926e-11	plasma
TRAM1	3.94107e-15	0.336054	0.623	0.21	6.88348e-11	plasma
PSMA3	6.1167e-15	0.265172	0.443	0.117	1.06834e-10	plasma
POLR2J	6.69937e-15	0.321627	0.623	0.213	1.17011e-10	plasma
NUDCD2	8.19573e-15	0.250684	0.459	0.124	1.43147e-10	plasma
PIN1	9.02589e-15	0.253548	0.475	0.131	1.57646e-10	plasma
MPC2	1.30442e-14	0.286695	0.459	0.128	2.27829e-10	plasma
PSMA5	1.72166e-14	0.306173	0.475	0.139	3.00706e-10	plasma
SLC25A5	1.84248e-14	0.428479	0.77	0.327	3.21808e-10	plasma
EMC7	2.20258e-14	0.253971	0.393	0.098	3.84702e-10	plasma
CENPX	2.33446e-14	0.256692	0.459	0.127	4.07737e-10	plasma
MRPS12	2.36144e-14	0.269819	0.459	0.129	4.12449e-10	plasma
NDUFA11	2.37147e-14	0.4216	0.754	0.334	4.14201e-10	plasma
COX17	2.91429e-14	0.393996	0.689	0.277	5.09009e-10	plasma
ENSA	4.01809e-14	0.283873	0.541	0.17	7.018e-10	plasma
PSMA7	4.77724e-14	0.494562	0.787	0.402	8.34393e-10	plasma
MRPL20	4.95303e-14	0.361868	0.607	0.219	8.65097e-10	plasma
ELOC	6.14557e-14	0.347118	0.59	0.211	1.07339e-09	plasma
HNRNPC	7.21886e-14	0.391715	0.672	0.273	1.26085e-09	plasma
COX6C	7.32623e-14	0.427345	0.902	0.529	1.2796e-09	plasma
TRMT112	1.12575e-13	0.376469	0.705	0.3	1.96623e-09	plasma
HNRNPD	1.40168e-13	0.303366	0.557	0.186	2.44817e-09	plasma
RABAC1	1.52697e-13	0.379446	0.59	0.214	2.66701e-09	plasma
MT-ND6	2.01508e-13	0.285502	0.508	0.156	3.51953e-09	plasma
SNRPD3	2.05861e-13	0.283007	0.475	0.144	3.59558e-09	plasma
MT-CO2	2.11677e-13	0.480877	1	0.997	3.69715e-09	plasma
MRPL18	2.33617e-13	0.253584	0.41	0.112	4.08035e-09	plasma
PHPT1	2.49645e-13	0.292116	0.59	0.204	4.3603e-09	plasma
POLR2I	3.30005e-13	0.293356	0.492	0.156	5.76386e-09	plasma
EIF5B	3.51221e-13	0.318488	0.59	0.209	6.13442e-09	plasma
PPM1G	4.09959e-13	0.32785	0.443	0.136	7.16034e-09	plasma
ATRAID	4.52689e-13	0.253782	0.426	0.121	7.90666e-09	plasma
PTMA	4.82135e-13	0.68709	0.951	0.992	8.42097e-09	plasma
CYTOR	4.93747e-13	0.357731	0.574	0.202	8.62378e-09	plasma
PSMD8	5.26133e-13	0.360193	0.492	0.16	9.18944e-09	plasma
RPL37A	5.8497e-13	0.404837	0.967	0.993	1.02171e-08	plasma
SRRM2	6.12548e-13	0.316979	0.574	0.204	1.06988e-08	plasma
SRSF2	7.15013e-13	0.429027	0.656	0.281	1.24884e-08	plasma
NDUFA12	7.73893e-13	0.282987	0.525	0.174	1.35168e-08	plasma
ZCRB1	7.80111e-13	0.284058	0.443	0.133	1.36254e-08	plasma
PARK7	8.57522e-13	0.38785	0.705	0.309	1.49775e-08	plasma
MPC1	9.57702e-13	0.261354	0.426	0.124	1.67272e-08	plasma
ATP5IF1	1.23361e-12	0.356718	0.689	0.276	2.15463e-08	plasma
P4HB	1.70061e-12	0.292509	0.574	0.202	2.97028e-08	plasma
NDUFB3	2.33702e-12	0.314482	0.574	0.211	4.08185e-08	plasma
HERPUD1	2.9643e-12	0.544964	0.59	0.231	5.17745e-08	plasma
ARHGDIA	3.39769e-12	0.273623	0.574	0.204	5.9344e-08	plasma
ATP5PO	4.32581e-12	0.418407	0.705	0.333	7.55545e-08	plasma
KRTCAP2	4.42389e-12	0.313909	0.59	0.226	7.72676e-08	plasma
RPL7A	4.70554e-12	0.407119	0.984	0.937	8.21869e-08	plasma
ARPC5L	5.92016e-12	0.26862	0.475	0.153	1.03401e-07	plasma
UBXN4	6.4035e-12	0.290734	0.541	0.19	1.11844e-07	plasma
FBL	7.95368e-12	0.252867	0.508	0.17	1.38919e-07	plasma
NOP56	1.00544e-11	0.260759	0.344	0.093	1.75611e-07	plasma
MINOS1	1.38981e-11	0.366126	0.721	0.342	2.42745e-07	plasma
ATP5MF	1.3987e-11	0.394478	0.738	0.356	2.44298e-07	plasma
UBE2L3	1.52519e-11	0.331386	0.59	0.235	2.6639e-07	plasma
RPS19BP1	1.67684e-11	0.303366	0.541	0.202	2.92877e-07	plasma
NDUFB8	2.13134e-11	0.328253	0.656	0.275	3.72259e-07	plasma
COX7A2	2.63551e-11	0.358203	0.951	0.672	4.60317e-07	plasma
MIF	3.12072e-11	0.396976	0.902	0.659	5.45065e-07	plasma
NDUFB9	3.47539e-11	0.336334	0.623	0.264	6.07012e-07	plasma
SSR1	3.99306e-11	0.28489	0.508	0.18	6.97428e-07	plasma
HSP90AB1	6.30366e-11	0.403939	0.689	0.309	1.101e-06	plasma
SELENOT	7.28767e-11	0.305813	0.607	0.247	1.27286e-06	plasma
DDX46	7.38526e-11	0.252982	0.525	0.19	1.28991e-06	plasma
DDT	8.93965e-11	0.288711	0.623	0.255	1.5614e-06	plasma
NDUFB4	1.05059e-10	0.31093	0.672	0.299	1.83496e-06	plasma
COX8A	1.65036e-10	0.367988	0.82	0.505	2.88253e-06	plasma
CCDC69	2.21904e-10	0.261426	0.377	0.117	3.87578e-06	plasma
MT-CO3	2.2225e-10	0.36699	0.984	0.994	3.88182e-06	plasma
RPS5	2.42574e-10	0.376684	0.967	0.945	4.2368e-06	plasma
TUBA1B	2.55236e-10	0.496796	0.705	0.391	4.45795e-06	plasma
RPS10	2.5558e-10	0.391256	0.918	0.832	4.46397e-06	plasma
RPL8	2.64342e-10	0.349137	0.984	0.989	4.617e-06	plasma
NDUFS7	2.97356e-10	0.258207	0.492	0.181	5.19361e-06	plasma
SERP1	7.26709e-10	0.392912	0.82	0.448	1.26927e-05	plasma
HINT1	7.76949e-10	0.323178	0.951	0.669	1.35702e-05	plasma
NDUFS8	8.98307e-10	0.25198	0.492	0.185	1.56898e-05	plasma
PSMA2	1.19945e-09	0.310292	0.525	0.212	2.09496e-05	plasma
DDX21	1.44841e-09	0.303455	0.508	0.207	2.52979e-05	plasma
NDUFA13	1.64765e-09	0.291941	0.59	0.262	2.87779e-05	plasma
CALM3	2.23051e-09	0.278136	0.607	0.264	3.89581e-05	plasma
SERBP1	2.47171e-09	0.347973	0.623	0.293	4.31709e-05	plasma
RPS17	2.60021e-09	0.320066	0.902	0.799	4.54152e-05	plasma
COX6B1	2.8869e-09	0.365081	0.836	0.665	5.04226e-05	plasma
TMEM256	2.90462e-09	0.263211	0.492	0.195	5.0732e-05	plasma
ARL6IP4	8.20394e-09	0.30811	0.754	0.406	0.00014329	plasma
C19orf53	8.74651e-09	0.301146	0.754	0.395	0.000152767	plasma
RPS4X	1.53724e-08	0.338561	1	0.987	0.000268494	plasma
RPS27L	1.85251e-08	0.269765	0.705	0.355	0.000323559	plasma
SSR4	2.05988e-08	0.539812	0.754	0.43	0.000359779	plasma
RAD23A	2.12432e-08	0.258754	0.426	0.163	0.000371034	plasma
TBCA	2.35707e-08	0.252674	0.738	0.365	0.000411685	plasma
RPS8	2.71683e-08	0.288103	0.984	0.994	0.000474521	plasma
RPS16	5.35993e-08	0.294598	0.967	0.989	0.000936166	plasma
NDUFA1	8.98161e-08	0.293716	0.721	0.41	0.00156873	plasma
RPS18	8.99069e-08	0.352273	1	0.997	0.00157031	plasma
UQCR10	1.37877e-07	0.287099	0.77	0.423	0.00240817	plasma
RPL36	1.54628e-07	0.286066	0.951	0.991	0.00270074	plasma
PSMB1	1.61118e-07	0.307976	0.508	0.248	0.00281409	plasma
COX7B	2.71628e-07	0.306149	0.738	0.41	0.00474426	plasma
PPIA	2.79771e-07	0.319748	0.836	0.63	0.00488647	plasma
MTRNR2L10	2.90226e-07	0.285485	0.525	0.253	0.00506908	plasma
OST4	4.7849e-07	0.320364	0.885	0.773	0.0083573	plasma
TUBB	5.01118e-07	0.286826	0.508	0.25	0.00875254	plasma
GAPDH	5.08097e-07	0.433355	0.918	0.957	0.00887443	plasma
RPLP1	2.06739e-06	0.270697	1	0.999	0.036109	plasma

## Sheet: 1d
Supplementary File 1d: Absolute and relative cluster size in Figure 2
Cluster	Control group patient 1	B27-AU group patient 1	B27-AU group patient 2	B27+AAU group patient 1	B27+AAU group patient 2	B27+AAU group patient 3	B27+AAU group patient 4	cluster size sum B27-AU	cluster size sum B27+ AAU	relative cluster size in % B27-AU	relative cluster size in % B27+ AAU	logratio
cDCa	1	12	1	107	32	5	374	13	518	0.529316	5.58912	1.02363
cDCb	28	44	52	298	168	12	170	96	648	3.90879	6.9918	0.252546
pDC	0	1	0	5	20	1	20	1	46	0.0407166	0.496331	1.086
matDC	0	0	17	35	3	1	5	17	44	0.692182	0.474752	-0.163754
myeloid	97	38	109	254	354	93	64	147	765	5.98534	8.25421	0.139586
granulo	445	112	351	692	675	163	90	463	1620	18.8518	17.4795	-0.0328236
NK	0	118	0	380	169	26	42	118	617	4.80456	6.65732	0.141645
gdTC	0	139	7	72	147	40	20	146	279	5.94463	3.01036	-0.295506
CD8	1	525	18	279	316	40	138	543	773	22.1091	8.34053	-0.423378
Treg	6	174	36	263	222	22	58	210	565	8.55049	6.09625	-0.146929
CD4	2	523	137	1580	1192	96	447	660	3315	26.873	35.7682	0.124182
naiveBc	0	32	4	9	7	1	6	36	23	1.4658	0.248166	-0.771332
plasma	0	6	0	2	52	0	1	6	55	0.2443	0.59344	0.385454
Meta-Cluster	Control group patient 1	B27-AU group patient 1	B27-AU group patient 2	B27+AAU group patient 1	B27+AAU group patient 2	B27+AAU group patient 3	B27+AAU group patient 4	cluster size sum B27-AU	cluster size sum B27+ AAU	relative cluster size in % B27-AU	relative cluster size in % B27+ AAU	logratio
mergeDC	29	57	70	445	223	19	569	127	1256	5.17101	13.552	0.418428
myeloidLin	542	150	460	946	1029	256	154	610	2385	24.8371	25.7337	0.0154009
toxic	1	782	25	731	632	106	200	807	1669	32.8583	18.0082	-0.261175
help	8	697	173	1843	1414	118	505	870	3880	35.4235	41.8645	0.0725548
BcLin	0	38	4	11	59	1	7	42	78	1.7101	0.841606	-0.307912

## Sheet: 1e
Supplementary File 1e: List of DE genes per meta cluster in Figure 3
Gene.ID	p.value	Avg_logFC	Pct.1	Pct.2	p_val_adj	Cluster.ID
SOCS1	2.21514e-52	-0.433818	0.031	0.37	3.86897e-48	mergedDC
CALHM6	7.69044e-47	-0.908753	0.1	0.528	1.34321e-42	mergedDC
B2M	1.09311e-42	-0.817401	0.998	0.992	1.90923e-38	mergedDC
NME2	4.05563e-39	-0.271122	0.021	0.268	7.08356e-35	mergedDC
GABARAP	2.63233e-38	-0.547026	0.104	0.504	4.59762e-34	mergedDC
UBD	1.04836e-36	-0.421285	0.002	0.15	1.83107e-32	mergedDC
ATP5F1D	2.0682e-33	-0.349907	0.083	0.441	3.61232e-29	mergedDC
GAPDH	2.8665e-33	-0.697168	0.969	0.976	5.00663e-29	mergedDC
AC020656.1	3.71374e-33	3.08547	0.65	0.055	6.48642e-29	mergedDC
PSMB10	3.6069e-32	-0.301776	0.068	0.394	6.29981e-28	mergedDC
CDC42	2.39987e-30	2.07177	0.75	0.291	4.19161e-26	mergedDC
BRI3	2.8666e-30	-0.552067	0.115	0.472	5.0068e-26	mergedDC
VDAC2	1.45614e-28	-0.363079	0.11	0.465	2.54329e-24	mergedDC
RGS2	2.07696e-28	-0.26427	0.031	0.26	3.62763e-24	mergedDC
HNRNPH1	5.15329e-28	1.76807	0.603	0.071	9.00073e-24	mergedDC
GSTP1	7.68922e-28	-0.623448	0.255	0.677	1.343e-23	mergedDC
ENO1	8.24395e-28	-0.525716	0.328	0.787	1.43989e-23	mergedDC
PSMB9	1.0637e-27	-0.489302	0.213	0.638	1.85786e-23	mergedDC
C4orf48	1.08742e-27	-0.286167	0.067	0.362	1.89928e-23	mergedDC
JUNB	1.10792e-27	-0.510022	0.201	0.622	1.93509e-23	mergedDC
ALDOA	3.45095e-27	-0.242518	0.057	0.339	6.02744e-23	mergedDC
PPP1CB	3.64038e-27	1.36245	0.614	0.11	6.35829e-23	mergedDC
B4GALT1	7.52487e-27	1.40766	0.565	0.039	1.31429e-22	mergedDC
CAPZA1	1.61733e-26	1.25242	0.683	0.22	2.82483e-22	mergedDC
EEF1A1	3.58577e-26	-0.680849	1	0.992	6.2629e-22	mergedDC
CAPG	1.1573e-25	-0.286907	0.057	0.323	2.02135e-21	mergedDC
HBB	1.81701e-25	-2.41245	0.002	0.102	3.17358e-21	mergedDC
XIST	1.08848e-24	-0.266312	0.088	0.402	1.90114e-20	mergedDC
EIF1	1.21213e-24	-0.522436	0.972	0.992	2.11711e-20	mergedDC
TYMP	3.97727e-24	-0.767979	0.395	0.74	6.94671e-20	mergedDC
IFITM1	5.48646e-24	-0.784988	0.107	0.402	9.58265e-20	mergedDC
CHCHD10	6.56661e-24	-0.251572	0.039	0.26	1.14692e-19	mergedDC
ANXA1	3.0097e-23	-0.385507	0.156	0.512	5.25674e-19	mergedDC
PPDPF	1.00925e-22	-0.574282	0.362	0.724	1.76276e-18	mergedDC
DUSP1	1.93579e-22	-0.362131	0.104	0.409	3.38105e-18	mergedDC
APOL4	2.04173e-22	-0.170468	0.029	0.22	3.56609e-18	mergedDC
C1orf56	3.31628e-22	1.3636	0.536	0.071	5.79222e-18	mergedDC
TPI1	3.75854e-22	-0.523767	0.368	0.748	6.56467e-18	mergedDC
RNF145	7.82949e-22	-0.31827	0.086	0.37	1.3675e-17	mergedDC
MALAT1	8.81615e-22	-0.810013	0.998	0.984	1.53983e-17	mergedDC
CD83	1.15768e-21	-0.256442	0.012	0.15	2.022e-17	mergedDC
SAMSN1	3.01875e-21	-0.322878	0.099	0.386	5.27256e-17	mergedDC
MYL6	6.01382e-21	-0.429669	0.861	0.976	1.05037e-16	mergedDC
IFI30	1.21851e-20	-0.479682	0.166	0.488	2.12826e-16	mergedDC
RAC1	2.74693e-20	-0.544114	0.216	0.543	4.79779e-16	mergedDC
CDC42SE1	2.95448e-20	1.28042	0.537	0.118	5.16029e-16	mergedDC
MGST3	7.63172e-20	-0.252219	0.09	0.362	1.33296e-15	mergedDC
H3F3B	1.55799e-19	-0.418769	0.926	0.945	2.72119e-15	mergedDC
IDO1	2.17768e-19	-0.250877	0.046	0.252	3.80354e-15	mergedDC
UBC	2.54829e-19	-0.386678	0.264	0.661	4.45085e-15	mergedDC
PGAM1	2.57237e-19	-0.341666	0.166	0.496	4.49291e-15	mergedDC
FPR1	3.7473e-19	-0.299511	0.15	0.472	6.54503e-15	mergedDC
HBA2	4.81062e-19	-0.945773	0	0.063	8.40222e-15	mergedDC
MDM4	4.93774e-19	0.940717	0.486	0.079	8.62426e-15	mergedDC
HLA-DRA	5.12732e-19	-0.684704	0.881	0.921	8.95539e-15	mergedDC
FCGR1A	8.01603e-19	-0.352387	0.189	0.528	1.40008e-14	mergedDC
HLA-DPB1	9.09591e-19	-0.715177	0.681	0.913	1.58869e-14	mergedDC
EEF2	9.58809e-19	-0.432847	0.415	0.764	1.67466e-14	mergedDC
CTSL	1.04112e-18	-0.253094	0.037	0.22	1.81843e-14	mergedDC
LGALS3	1.09428e-18	-0.2795	0.071	0.307	1.91127e-14	mergedDC
HLA-DRB1	1.31641e-18	-0.988631	0.664	0.89	2.29924e-14	mergedDC
CTNNB1	1.78095e-18	1.05338	0.49	0.094	3.11061e-14	mergedDC
RHOG	1.97965e-18	-0.316707	0.23	0.598	3.45766e-14	mergedDC
LAPTM5	2.03471e-18	-0.452685	0.417	0.74	3.55382e-14	mergedDC
ZFP36	2.31421e-18	-0.413702	0.177	0.496	4.04201e-14	mergedDC
TUBB	2.67366e-18	-0.36646	0.228	0.583	4.66982e-14	mergedDC
BTG1	3.48307e-18	-0.48928	0.27	0.638	6.08352e-14	mergedDC
UBB	5.91713e-18	-0.44243	0.159	0.465	1.03349e-13	mergedDC
AOAH	6.46132e-18	-0.161734	0.027	0.189	1.12853e-13	mergedDC
OAZ1	1.23644e-17	-0.375743	0.944	0.984	2.15957e-13	mergedDC
POLD4	1.38854e-17	-0.145261	0.03	0.197	2.42522e-13	mergedDC
STAT2	1.45484e-17	0.998875	0.457	0.071	2.54102e-13	mergedDC
ATP5F1B	1.6025e-17	-0.276245	0.107	0.37	2.79893e-13	mergedDC
HEBP2	1.68255e-17	-0.158671	0.036	0.213	2.93875e-13	mergedDC
CD68	1.80687e-17	-0.30303	0.147	0.449	3.15588e-13	mergedDC
RNH1	2.71141e-17	-0.248914	0.119	0.402	4.73575e-13	mergedDC
SLC25A6	2.84805e-17	-0.399332	0.693	0.906	4.97441e-13	mergedDC
FGD2	4.21261e-17	1.17742	0.512	0.157	7.35774e-13	mergedDC
S100A6	5.5974e-17	-0.557061	0.957	0.929	9.77642e-13	mergedDC
HIF1A-AS2	6.42852e-17	-0.19818	0.035	0.205	1.12281e-12	mergedDC
PSMB3	6.53493e-17	-0.252447	0.088	0.331	1.14139e-12	mergedDC
ARF1	7.07424e-17	-0.254618	0.161	0.472	1.23559e-12	mergedDC
PSME2	7.51027e-17	-0.393643	0.271	0.622	1.31174e-12	mergedDC
CSTA	8.02631e-17	-0.352155	0.246	0.598	1.40187e-12	mergedDC
PSME1	8.87182e-17	-0.378688	0.373	0.74	1.54955e-12	mergedDC
PFN1	9.99456e-17	-0.373521	0.923	0.976	1.74565e-12	mergedDC
MYO1G	1.18184e-16	-0.192785	0.072	0.299	2.0642e-12	mergedDC
C17orf49	2.80459e-16	-0.130199	0.023	0.165	4.8985e-12	mergedDC
SLC16A3	3.23679e-16	-0.290157	0.136	0.409	5.65337e-12	mergedDC
ACTG1	3.65122e-16	-0.487241	0.815	0.929	6.37723e-12	mergedDC
CFL1	3.75705e-16	-0.322651	0.857	0.945	6.56207e-12	mergedDC
IGFLR1	4.76682e-16	-0.16747	0.048	0.236	8.32572e-12	mergedDC
EEF1G	5.10572e-16	-0.128099	0.017	0.142	8.91764e-12	mergedDC
GBP2	5.29262e-16	-0.327969	0.174	0.472	9.24409e-12	mergedDC
HAPLN3	5.58238e-16	-0.149115	0.029	0.181	9.75018e-12	mergedDC
ALDH2	7.09109e-16	-0.258516	0.115	0.378	1.23853e-11	mergedDC
ODF3B	7.3478e-16	-0.214216	0.092	0.331	1.28337e-11	mergedDC
CYBA	8.28336e-16	-0.460767	0.811	0.89	1.44677e-11	mergedDC
CD63	1.01202e-15	-0.415832	0.271	0.591	1.7676e-11	mergedDC
FOS	1.14133e-15	-0.748922	0.201	0.504	1.99344e-11	mergedDC
VIM	1.36499e-15	-0.557712	0.865	0.921	2.38408e-11	mergedDC
TMEM176A	1.40566e-15	-0.334771	0.08	0.299	2.45512e-11	mergedDC
JUN	1.81033e-15	-0.229424	0.027	0.173	3.16193e-11	mergedDC
LDHA	1.92365e-15	-0.425354	0.44	0.74	3.35985e-11	mergedDC
SPI1	1.96459e-15	-0.296476	0.166	0.457	3.43135e-11	mergedDC
AC092069.1	2.39772e-15	1.30447	0.373	0.016	4.18786e-11	mergedDC
LAD1	2.4688e-15	-0.113754	0.008	0.102	4.312e-11	mergedDC
TXN	2.5616e-15	-0.735198	0.261	0.567	4.47408e-11	mergedDC
PKM	2.6237e-15	-0.332459	0.303	0.661	4.58256e-11	mergedDC
COPE	3.20361e-15	-0.277613	0.143	0.409	5.59542e-11	mergedDC
RNASEK	3.48428e-15	-0.162359	0.045	0.22	6.08564e-11	mergedDC
CD86	3.56744e-15	-0.214144	0.106	0.354	6.23089e-11	mergedDC
RAB13	4.11588e-15	-0.28801	0.088	0.307	7.18879e-11	mergedDC
FLOT1	6.47139e-15	-0.197711	0.094	0.331	1.13029e-10	mergedDC
VAMP8	6.52068e-15	-0.381655	0.436	0.795	1.1389e-10	mergedDC
ANXA6	6.53561e-15	-0.15067	0.033	0.189	1.14151e-10	mergedDC
LGALS1	7.43628e-15	-0.57427	0.764	0.827	1.29882e-10	mergedDC
IFITM3	7.45072e-15	-0.619214	0.416	0.74	1.30134e-10	mergedDC
SET	7.67246e-15	0.947832	0.596	0.315	1.34007e-10	mergedDC
REPIN1	8.40253e-15	-0.16528	0.026	0.165	1.46759e-10	mergedDC
CDKN1A	8.54433e-15	-0.247826	0.097	0.331	1.49235e-10	mergedDC
TALDO1	1.03544e-14	-0.244162	0.088	0.315	1.80849e-10	mergedDC
PSMC3	1.05905e-14	-0.155969	0.046	0.22	1.84974e-10	mergedDC
TMEM176B	1.09077e-14	-0.364399	0.096	0.315	1.90514e-10	mergedDC
RELB	1.41394e-14	-0.144833	0.024	0.157	2.46959e-10	mergedDC
PSAP	1.54788e-14	-0.437856	0.338	0.677	2.70352e-10	mergedDC
ATP6V0B	1.57271e-14	-0.26309	0.177	0.465	2.74689e-10	mergedDC
ATP5F1C	1.7486e-14	-0.228911	0.14	0.409	3.05411e-10	mergedDC
CREG1	1.8551e-14	-0.206864	0.061	0.252	3.24012e-10	mergedDC
PGK1	2.05206e-14	-0.340555	0.298	0.646	3.58413e-10	mergedDC
HMGA1	2.6059e-14	-0.199708	0.087	0.307	4.55147e-10	mergedDC
HNRNPA2B1	2.89908e-14	-0.334043	0.254	0.575	5.06353e-10	mergedDC
HLA-DPA1	3.28794e-14	-0.619949	0.7	0.913	5.74272e-10	mergedDC
VSIG4	3.31656e-14	-0.414101	0.146	0.386	5.7927e-10	mergedDC
ADAM28	3.32719e-14	-0.267321	0.094	0.315	5.81127e-10	mergedDC
PPA1	4.76739e-14	-0.74733	0.282	0.567	8.32672e-10	mergedDC
UPP1	5.34308e-14	-0.20113	0.126	0.386	9.33222e-10	mergedDC
NBPF19	5.35344e-14	-0.136551	0.041	0.205	9.35032e-10	mergedDC
OGFRL1	5.7908e-14	-0.199708	0.084	0.299	1.01142e-09	mergedDC
SOCS3	6.48789e-14	-0.318407	0.092	0.307	1.13317e-09	mergedDC
RHOA	6.91057e-14	-0.32131	0.346	0.685	1.207e-09	mergedDC
NMT1	1.20123e-13	-0.159333	0.046	0.213	2.09807e-09	mergedDC
LSP1	1.25866e-13	-0.349357	0.24	0.543	2.19838e-09	mergedDC
S100A11	1.45741e-13	-0.42278	0.865	0.913	2.54551e-09	mergedDC
C3AR1	1.70483e-13	-0.209087	0.061	0.244	2.97765e-09	mergedDC
AP2S1	1.77243e-13	-0.332886	0.293	0.606	3.09573e-09	mergedDC
TMSB10	1.89352e-13	-0.472853	1	0.992	3.30722e-09	mergedDC
TUBA1B	2.10566e-13	-0.418429	0.475	0.835	3.67774e-09	mergedDC
ARPC1B	2.26267e-13	-0.36259	0.421	0.748	3.95197e-09	mergedDC
MTHFD2	2.49858e-13	-0.235387	0.193	0.488	4.36402e-09	mergedDC
DPP7	2.92681e-13	-0.165786	0.064	0.252	5.11196e-09	mergedDC
CALM3	3.41137e-13	-0.271084	0.168	0.433	5.9583e-09	mergedDC
S100A10	3.50194e-13	-0.460687	0.739	0.85	6.1165e-09	mergedDC
CBX6	3.66257e-13	0.979842	0.451	0.142	6.39704e-09	mergedDC
CTSZ	3.70297e-13	-0.342542	0.209	0.488	6.46761e-09	mergedDC
CHMP4B	3.72391e-13	-0.191202	0.092	0.307	6.50419e-09	mergedDC
ANKRD37	4.04335e-13	-0.16747	0.052	0.22	7.06212e-09	mergedDC
SDCBP	4.25688e-13	-0.298633	0.158	0.417	7.43507e-09	mergedDC
DUSP4	4.34804e-13	-0.209703	0.013	0.11	7.59429e-09	mergedDC
SRSF9	5.04498e-13	-0.18612	0.111	0.346	8.81157e-09	mergedDC
CHP1	5.22603e-13	0.706342	0.414	0.102	9.12779e-09	mergedDC
RAB9A	6.92365e-13	-0.15105	0.033	0.173	1.20928e-08	mergedDC
YWHAE	7.85956e-13	0.87026	0.525	0.26	1.37275e-08	mergedDC
CD200	8.12123e-13	-0.1045	0.007	0.087	1.41845e-08	mergedDC
LY86	9.00161e-13	-0.24187	0.106	0.323	1.57222e-08	mergedDC
RNF187	9.52526e-13	-0.128944	0.03	0.165	1.66368e-08	mergedDC
OGFR	9.70287e-13	-0.162978	0.069	0.26	1.6947e-08	mergedDC
C7orf50	1.27095e-12	-0.329842	0.187	0.449	2.21984e-08	mergedDC
FKBP1A	1.28176e-12	-0.245236	0.268	0.583	2.23872e-08	mergedDC
MXI1	1.37988e-12	-0.164013	0.049	0.213	2.41009e-08	mergedDC
COX6A1	1.74343e-12	-0.267887	0.24	0.535	3.04507e-08	mergedDC
H2AFZ	1.76353e-12	-0.3043	0.248	0.535	3.08019e-08	mergedDC
EIF3H	1.94041e-12	-0.244849	0.234	0.543	3.38913e-08	mergedDC
CCL19	1.97271e-12	-0.651526	0.024	0.142	3.44553e-08	mergedDC
ANXA2	2.1275e-12	-0.26537	0.279	0.606	3.7159e-08	mergedDC
CLIC1	2.15722e-12	-0.316617	0.373	0.685	3.76781e-08	mergedDC
DNAJC15	2.19128e-12	-0.208649	0.141	0.386	3.8273e-08	mergedDC
CST7	2.21719e-12	-0.267629	0.068	0.252	3.87254e-08	mergedDC
SERPINA1	2.321e-12	-0.370529	0.217	0.496	4.05386e-08	mergedDC
ABHD12	2.6436e-12	-0.110499	0.021	0.134	4.61731e-08	mergedDC
ATP6V0E1	2.75283e-12	-0.333662	0.29	0.567	4.8081e-08	mergedDC
MTFP1	2.84896e-12	-0.106698	0.018	0.126	4.97599e-08	mergedDC
GRN	3.01911e-12	-0.313841	0.253	0.543	5.27318e-08	mergedDC
GPX4	3.04907e-12	-0.413619	0.376	0.685	5.3255e-08	mergedDC
HMGN2	3.09957e-12	-0.333032	0.279	0.583	5.4137e-08	mergedDC
PSMB8	3.37559e-12	-0.25692	0.196	0.472	5.8958e-08	mergedDC
FBXW5	4.17596e-12	-0.175171	0.07	0.252	7.29372e-08	mergedDC
EIF2S3	4.57189e-12	0.705991	0.394	0.102	7.98527e-08	mergedDC
TUBA1C	4.71766e-12	-0.20317	0.071	0.252	8.23986e-08	mergedDC
HLA-B	4.831e-12	-0.306896	0.97	0.992	8.43782e-08	mergedDC
THEMIS2	4.86492e-12	-0.178601	0.094	0.299	8.49707e-08	mergedDC
PYCARD	4.88285e-12	-0.305262	0.274	0.567	8.52838e-08	mergedDC
SERPINB9	4.97011e-12	0.798174	0.34	0.047	8.68079e-08	mergedDC
TAF10	5.35701e-12	-0.118428	0.035	0.173	9.35656e-08	mergedDC
BNIP3L	7.13588e-12	-0.272753	0.222	0.496	1.24635e-07	mergedDC
ATP5PD	7.48114e-12	-0.23196	0.198	0.472	1.30666e-07	mergedDC
HLA-DQB1	7.90406e-12	-0.518226	0.421	0.732	1.38052e-07	mergedDC
RASSF3	8.16473e-12	0.735047	0.379	0.094	1.42605e-07	mergedDC
VSIR	8.36241e-12	-0.269072	0.17	0.417	1.46058e-07	mergedDC
FCGR2B	8.57168e-12	-0.344916	0.126	0.339	1.49713e-07	mergedDC
DYNLT1	9.21881e-12	-0.216443	0.201	0.472	1.61016e-07	mergedDC
ARGLU1	9.2266e-12	0.703599	0.467	0.181	1.61152e-07	mergedDC
CHPT1	1.14831e-11	-0.173421	0.063	0.236	2.00563e-07	mergedDC
SF3A1	1.14952e-11	-0.112583	0.03	0.157	2.00776e-07	mergedDC
IFITM2	1.15101e-11	-0.440248	0.55	0.732	2.01036e-07	mergedDC
CNBP	1.18955e-11	-0.210204	0.193	0.465	2.07767e-07	mergedDC
MTRNR2L8	1.2215e-11	-0.283626	0.315	0.622	2.13348e-07	mergedDC
HPCAL1	1.40244e-11	-0.113988	0.03	0.157	2.4495e-07	mergedDC
SYNGR2	1.42658e-11	-0.289755	0.153	0.386	2.49167e-07	mergedDC
PRDX2	1.60987e-11	-0.161286	0.041	0.181	2.8118e-07	mergedDC
SERPINB1	1.6912e-11	-0.25183	0.238	0.52	2.95385e-07	mergedDC
BCL2L14	1.69967e-11	-0.135098	0.022	0.134	2.96864e-07	mergedDC
GSTO1	1.79475e-11	-0.239493	0.168	0.409	3.1347e-07	mergedDC
BRK1	2.2186e-11	-0.255375	0.282	0.575	3.87501e-07	mergedDC
C6orf62	2.28945e-11	0.674095	0.482	0.213	3.99876e-07	mergedDC
TLR2	2.37107e-11	-0.189459	0.11	0.323	4.14132e-07	mergedDC
CD74	2.50207e-11	-0.469901	0.921	0.937	4.37012e-07	mergedDC
ACAA1	2.71306e-11	-0.144429	0.072	0.252	4.73863e-07	mergedDC
FCGR1B	3.43155e-11	-0.231201	0.093	0.283	5.99355e-07	mergedDC
RAB5IF	3.95279e-11	-0.181644	0.1	0.299	6.90394e-07	mergedDC
HNRNPA1	4.15291e-11	-0.342321	0.652	0.78	7.25348e-07	mergedDC
CRIP1	4.17644e-11	-0.715856	0.141	0.354	7.29457e-07	mergedDC
GHITM	4.33809e-11	-0.16859	0.087	0.276	7.57691e-07	mergedDC
ANXA4	4.3922e-11	-0.141107	0.038	0.173	7.67142e-07	mergedDC
ANPEP	4.4931e-11	-0.108942	0.021	0.126	7.84764e-07	mergedDC
FKBP8	4.50244e-11	-0.188932	0.151	0.394	7.86396e-07	mergedDC
ERP29	4.52461e-11	-0.233663	0.153	0.386	7.90269e-07	mergedDC
SLC25A5	4.6463e-11	-0.304882	0.287	0.567	8.11523e-07	mergedDC
NENF	4.68279e-11	-0.117986	0.026	0.142	8.17897e-07	mergedDC
RGS1	5.01083e-11	-0.258925	0.037	0.165	8.75192e-07	mergedDC
HLA-C	5.66857e-11	-0.24145	0.884	0.969	9.90073e-07	mergedDC
FSCN1	6.50135e-11	-0.179371	0.024	0.134	1.13553e-06	mergedDC
TMBIM6	6.50138e-11	-0.208071	0.237	0.528	1.13553e-06	mergedDC
ABI3	7.09662e-11	-0.147032	0.071	0.244	1.2395e-06	mergedDC
PILRA	7.26833e-11	-0.142854	0.06	0.22	1.26949e-06	mergedDC
P4HB	7.50594e-11	-0.229609	0.159	0.394	1.31099e-06	mergedDC
ITGAX	7.51966e-11	1.23507	0.36	0.094	1.31338e-06	mergedDC
EVI2B	8.03041e-11	-0.276899	0.213	0.465	1.40259e-06	mergedDC
PNRC1	8.48292e-11	-0.280663	0.197	0.457	1.48163e-06	mergedDC
EFHD2	1.04033e-10	-0.210764	0.158	0.394	1.81704e-06	mergedDC
SLC7A7	1.04579e-10	-0.171237	0.072	0.244	1.82657e-06	mergedDC
EIF4A2	1.05986e-10	-0.219479	0.127	0.339	1.85115e-06	mergedDC
TRAPPC1	1.08984e-10	-0.227226	0.165	0.394	1.90352e-06	mergedDC
LRRC25	1.18358e-10	-0.161039	0.057	0.213	2.06724e-06	mergedDC
ALOX5	1.23814e-10	-0.164829	0.092	0.283	2.16253e-06	mergedDC
NUBP1	1.28851e-10	-0.10636	0.036	0.165	2.25051e-06	mergedDC
H2AFJ	1.3301e-10	-0.215657	0.092	0.276	2.32315e-06	mergedDC
BLVRB	1.36556e-10	-0.234038	0.118	0.323	2.38509e-06	mergedDC
WTAP	1.4717e-10	0.596167	0.382	0.118	2.57048e-06	mergedDC
HLA-DMA	1.5041e-10	-0.34457	0.329	0.591	2.62707e-06	mergedDC
DUSP5	1.50573e-10	-0.294458	0.029	0.142	2.62991e-06	mergedDC
NBEAL1	1.619e-10	0.391682	0.314	0.047	2.82774e-06	mergedDC
NUCB1	1.8177e-10	-0.160804	0.077	0.252	3.17479e-06	mergedDC
HSP90AB1	1.86252e-10	-0.223487	0.194	0.449	3.25308e-06	mergedDC
UBE2D3	2.04568e-10	-0.209897	0.298	0.598	3.57299e-06	mergedDC
CCR7	2.18142e-10	-0.283439	0.029	0.142	3.81007e-06	mergedDC
BTN3A2	2.2522e-10	-0.112335	0.033	0.157	3.93369e-06	mergedDC
CSF2RA	2.44049e-10	-0.429922	0.157	0.37	4.26256e-06	mergedDC
FCGRT	2.44098e-10	-0.207488	0.166	0.402	4.26342e-06	mergedDC
MGAT1	2.71311e-10	-0.195486	0.156	0.386	4.73872e-06	mergedDC
WASF2	2.77182e-10	0.802078	0.539	0.331	4.84126e-06	mergedDC
PSMA7	3.0931e-10	-0.290806	0.279	0.543	5.4024e-06	mergedDC
ATF4	3.15759e-10	-0.239999	0.123	0.323	5.51504e-06	mergedDC
MCL1	3.98269e-10	-0.263604	0.197	0.433	6.95617e-06	mergedDC
BCL2A1	4.10614e-10	-0.162187	0.115	0.323	7.17179e-06	mergedDC
PRDX3	4.17633e-10	-0.156468	0.092	0.276	7.29438e-06	mergedDC
TMSB4X	5.22535e-10	-0.383678	0.999	1	9.1266e-06	mergedDC
TRADD	5.71633e-10	-0.130509	0.049	0.189	9.98414e-06	mergedDC
CSNK2B	5.85668e-10	-0.193276	0.127	0.331	1.02293e-05	mergedDC
SAT2	5.9606e-10	-0.193553	0.115	0.307	1.04108e-05	mergedDC
RNF130	6.0343e-10	-0.22765	0.197	0.441	1.05395e-05	mergedDC
CEBPB	6.34116e-10	-0.349198	0.184	0.402	1.10755e-05	mergedDC
FTH1	6.68734e-10	-0.346467	0.998	1	1.16801e-05	mergedDC
SIAH2	7.01378e-10	-0.145608	0.024	0.126	1.22503e-05	mergedDC
CLEC2B	7.04113e-10	-0.234364	0.13	0.331	1.2298e-05	mergedDC
TPP1	7.68552e-10	-0.163399	0.165	0.402	1.34235e-05	mergedDC
BRD7	8.13494e-10	-0.114343	0.045	0.181	1.42085e-05	mergedDC
CHD3	9.34658e-10	-0.116288	0.024	0.126	1.63247e-05	mergedDC
SQOR	9.39491e-10	-0.176249	0.096	0.276	1.64091e-05	mergedDC
PRELID1	9.43783e-10	-0.251075	0.299	0.575	1.64841e-05	mergedDC
UBE2R2	9.69714e-10	-0.173308	0.127	0.331	1.6937e-05	mergedDC
FAM89B	1.07664e-09	-0.130998	0.037	0.157	1.88046e-05	mergedDC
LGALS9	1.09898e-09	-0.234878	0.205	0.441	1.91948e-05	mergedDC
FNBP1	1.12744e-09	-0.257467	0.196	0.433	1.96919e-05	mergedDC
ARPC4	1.13374e-09	0.880123	0.544	0.378	1.9802e-05	mergedDC
CALR	1.21999e-09	1.27086	0.573	0.386	2.13083e-05	mergedDC
RNF181	1.33105e-09	-0.19201	0.135	0.339	2.32481e-05	mergedDC
TAP1	1.36412e-09	-0.206668	0.127	0.323	2.38258e-05	mergedDC
NCF4	1.48325e-09	-0.120593	0.061	0.213	2.59065e-05	mergedDC
DOCK5	1.54537e-09	0.566246	0.307	0.063	2.69914e-05	mergedDC
GNG5	1.58171e-09	-0.277051	0.39	0.669	2.76261e-05	mergedDC
DDAH2	1.63158e-09	-0.12992	0.107	0.299	2.84971e-05	mergedDC
ARPC3	1.72834e-09	-0.275566	0.533	0.772	3.01871e-05	mergedDC
CLEC7A	1.80561e-09	0.910224	0.598	0.441	3.15367e-05	mergedDC
IMPDH1	1.80964e-09	-0.110817	0.044	0.173	3.16072e-05	mergedDC
SECTM1	1.81171e-09	-0.150708	0.07	0.228	3.16433e-05	mergedDC
GPSM3	1.89088e-09	-0.227219	0.256	0.512	3.3026e-05	mergedDC
EVI2A	1.90099e-09	-0.221924	0.146	0.354	3.32027e-05	mergedDC
SEC22B	1.97759e-09	0.505411	0.279	0.039	3.45406e-05	mergedDC
KCNJ2	1.98063e-09	0.801932	0.279	0.039	3.45936e-05	mergedDC
CSTB	2.03426e-09	-0.221929	0.397	0.709	3.55304e-05	mergedDC
CLEC4E	2.17012e-09	-0.122447	0.044	0.173	3.79034e-05	mergedDC
TYROBP	2.32264e-09	-0.396825	0.764	0.843	4.05672e-05	mergedDC
ATP5MC3	2.3761e-09	-0.222133	0.248	0.496	4.1501e-05	mergedDC
DDT	2.55218e-09	-0.227887	0.2	0.425	4.45763e-05	mergedDC
RAB7A	2.63547e-09	-0.176584	0.146	0.354	4.60311e-05	mergedDC
MYL12B	2.85779e-09	-0.238543	0.247	0.504	4.99141e-05	mergedDC
UBE2F	2.91992e-09	-0.186525	0.114	0.299	5.09993e-05	mergedDC
RALY	2.92127e-09	-0.149258	0.085	0.252	5.1023e-05	mergedDC
PLD3	3.10888e-09	-0.126433	0.075	0.236	5.42997e-05	mergedDC
MAP2K2	3.14261e-09	-0.11146	0.045	0.173	5.48889e-05	mergedDC
MTRNR2L10	3.22499e-09	-0.165918	0.154	0.37	5.63277e-05	mergedDC
H2AFV	3.28805e-09	-0.165571	0.135	0.339	5.74291e-05	mergedDC
CAPZB	3.3493e-09	-0.181435	0.221	0.48	5.84988e-05	mergedDC
IL10RA	3.44741e-09	-0.147897	0.101	0.283	6.02125e-05	mergedDC
PTPN1	3.45308e-09	-0.204693	0.142	0.346	6.03114e-05	mergedDC
TGFBI	3.54571e-09	-0.218259	0.119	0.307	6.19294e-05	mergedDC
PSMC6	3.64965e-09	-0.140762	0.068	0.22	6.37449e-05	mergedDC
CARD16	3.71878e-09	-0.23035	0.187	0.409	6.49522e-05	mergedDC
SUPT4H1	4.24817e-09	-0.187777	0.139	0.339	7.41986e-05	mergedDC
HK2	4.28862e-09	-0.250613	0.114	0.299	7.4905e-05	mergedDC
PDIA3	4.30457e-09	-0.175488	0.191	0.433	7.51835e-05	mergedDC
TRA2A	4.63896e-09	0.48286	0.334	0.094	8.10241e-05	mergedDC
THRAP3	5.26332e-09	0.612568	0.328	0.094	9.19292e-05	mergedDC
SCAND1	5.30044e-09	-0.169858	0.124	0.315	9.25774e-05	mergedDC
HNRNPDL	5.3409e-09	-0.196555	0.232	0.488	9.32842e-05	mergedDC
UBE2L3	5.72554e-09	-0.192801	0.142	0.339	0.000100002	mergedDC
ARF5	5.81027e-09	-0.156137	0.088	0.252	0.000101482	mergedDC
PPP3CA	5.81919e-09	0.438035	0.262	0.031	0.000101638	mergedDC
ALOX15B	6.02725e-09	-0.132516	0.042	0.165	0.000105272	mergedDC
OSTF1	6.20197e-09	-0.154174	0.117	0.307	0.000108324	mergedDC
TNIP2	6.45421e-09	-0.113988	0.036	0.15	0.000112729	mergedDC
LYZ	6.61348e-09	0.971669	0.82	0.661	0.000115511	mergedDC
HSD17B10	6.62451e-09	-0.123199	0.054	0.189	0.000115704	mergedDC
UQCRC1	6.66144e-09	-0.128104	0.069	0.22	0.000116349	mergedDC
YWHAZ	6.94582e-09	0.675833	0.513	0.331	0.000121316	mergedDC
EIF3L	6.98913e-09	-0.229726	0.215	0.449	0.000122072	mergedDC
ENY2	7.06328e-09	-0.176249	0.197	0.433	0.000123367	mergedDC
DLD	7.11711e-09	-0.113353	0.029	0.134	0.000124308	mergedDC
HSBP1	7.30133e-09	-0.199019	0.205	0.441	0.000127525	mergedDC
IL13RA1	7.79612e-09	-0.167245	0.147	0.354	0.000136167	mergedDC
APOBEC3C	8.52588e-09	0.49131	0.348	0.11	0.000148913	mergedDC
TGFB1	8.59439e-09	-0.131564	0.115	0.307	0.00015011	mergedDC
GLRX	8.67443e-09	-0.241376	0.216	0.441	0.000151508	mergedDC
IER2	9.09707e-09	-0.283143	0.194	0.417	0.000158889	mergedDC
CD53	9.14825e-09	-0.184593	0.21	0.449	0.000159783	mergedDC
REX1BD	9.64858e-09	-0.175383	0.122	0.307	0.000168522	mergedDC
NDRG1	9.93954e-09	-0.14004	0.048	0.173	0.000173604	mergedDC
APLP2	1.02603e-08	-0.235739	0.203	0.425	0.000179206	mergedDC
AGPAT2	1.04453e-08	-0.12356	0.067	0.213	0.000182437	mergedDC
ASGR1	1.06283e-08	-0.141991	0.052	0.181	0.000185633	mergedDC
NRBF2	1.08441e-08	-0.117824	0.033	0.142	0.000189403	mergedDC
NDUFA4	1.15492e-08	-0.242908	0.356	0.622	0.000201719	mergedDC
PKN1	1.18782e-08	-0.115991	0.044	0.165	0.000207465	mergedDC
MAD1L1	1.2367e-08	-0.114478	0.044	0.165	0.000216003	mergedDC
MALT1	1.27173e-08	-0.114124	0.024	0.118	0.000222121	mergedDC
NCF2	1.27652e-08	-0.192098	0.144	0.339	0.000222958	mergedDC
CASP1	1.32381e-08	-0.185825	0.115	0.291	0.000231217	mergedDC
ATG3	1.39519e-08	-0.170631	0.209	0.449	0.000243684	mergedDC
TNFSF13B	1.65666e-08	-0.228835	0.372	0.646	0.000289352	mergedDC
WDR33	1.68172e-08	-0.101102	0.041	0.157	0.000293729	mergedDC
NDUFS7	1.74247e-08	-0.158986	0.132	0.323	0.000304339	mergedDC
PTAFR	1.75799e-08	-0.115598	0.075	0.228	0.00030705	mergedDC
TP53	1.82189e-08	0.493324	0.256	0.039	0.000318211	mergedDC
LAMTOR5	1.91335e-08	-0.195859	0.221	0.449	0.000334186	mergedDC
RAMP1	2.18932e-08	-0.129122	0.009	0.071	0.000382387	mergedDC
PLEKHO1	2.23301e-08	-0.220244	0.225	0.465	0.000390018	mergedDC
GCA	2.30501e-08	-0.190927	0.201	0.417	0.000402594	mergedDC
AIF1	2.33202e-08	-0.43835	0.514	0.701	0.000407311	mergedDC
TMED9	2.46301e-08	-0.112843	0.057	0.189	0.000430189	mergedDC
MAP1LC3B	2.57673e-08	-0.18466	0.104	0.268	0.000450051	mergedDC
PIM3	2.62185e-08	-0.115377	0.038	0.15	0.000457933	mergedDC
MAP3K7CL	2.69976e-08	-0.136928	0.045	0.165	0.000471539	mergedDC
NDUFA13	2.7112e-08	-0.158141	0.148	0.346	0.000473539	mergedDC
C19orf24	2.78964e-08	-0.116901	0.042	0.157	0.000487238	mergedDC
CORO1B	2.98862e-08	-0.146101	0.096	0.26	0.000521992	mergedDC
ECH1	3.00101e-08	-0.101863	0.038	0.15	0.000524156	mergedDC
ATP6V1G1	3.00229e-08	-0.206306	0.384	0.661	0.00052438	mergedDC
AREG	3.09296e-08	-0.520709	0.068	0.205	0.000540216	mergedDC
CCDC69	3.54778e-08	-0.107179	0.072	0.22	0.000619656	mergedDC
PPP4C	3.57164e-08	-0.131776	0.092	0.252	0.000623822	mergedDC
HEXB	3.72218e-08	-0.127282	0.062	0.197	0.000650116	mergedDC
TMEM59	3.84697e-08	-0.205896	0.123	0.299	0.000671911	mergedDC
MARCKSL1	4.17754e-08	-0.302967	0.033	0.134	0.000729649	mergedDC
ATP5PF	4.2811e-08	-0.204459	0.26	0.496	0.000747737	mergedDC
LAMTOR1	4.75588e-08	-0.187366	0.216	0.433	0.000830662	mergedDC
LAP3	4.77354e-08	-0.221921	0.304	0.551	0.000833746	mergedDC
RIN2	4.81249e-08	0.584568	0.256	0.047	0.00084055	mergedDC
ATP5MD	4.83236e-08	-0.212992	0.412	0.677	0.000844021	mergedDC
HBA1	5.05265e-08	-0.669242	0	0.024	0.000882496	mergedDC
LTA4H	5.20269e-08	-0.209881	0.084	0.228	0.000908702	mergedDC
NCF1	5.51611e-08	-0.160131	0.182	0.402	0.000963444	mergedDC
PARK7	5.6214e-08	-0.19364	0.197	0.409	0.000981834	mergedDC
TSPO	5.76034e-08	-0.321493	0.252	0.457	0.0010061	mergedDC
MARCKS	6.02385e-08	0.957962	0.448	0.252	0.00105213	mergedDC
CYP27A1	6.15063e-08	-0.113485	0.023	0.11	0.00107427	mergedDC
SRSF6	6.34256e-08	0.401566	0.225	0.024	0.00110779	mergedDC
LST1	6.38131e-08	-0.204322	0.396	0.717	0.00111456	mergedDC
GLUL	6.71191e-08	-0.625029	0.346	0.559	0.0011723	mergedDC
UQCRC2	6.96707e-08	-0.147854	0.1	0.26	0.00121687	mergedDC
DDOST	7.04231e-08	-0.110597	0.055	0.181	0.00123001	mergedDC
XRCC6	7.05368e-08	-0.13812	0.068	0.205	0.001232	mergedDC
CD302	7.11401e-08	-0.160945	0.132	0.315	0.00124253	mergedDC
ATP5ME	7.48489e-08	-0.212059	0.307	0.551	0.00130731	mergedDC
FCER1G	7.51462e-08	-0.449387	0.598	0.701	0.0013125	mergedDC
GOLIM4	7.86179e-08	0.496707	0.27	0.063	0.00137314	mergedDC
COX5A	8.36248e-08	-0.204046	0.232	0.449	0.00146059	mergedDC
NDUFB5	8.46013e-08	-0.171469	0.127	0.299	0.00147765	mergedDC
ZNF395	8.6757e-08	-0.129522	0.052	0.173	0.0015153	mergedDC
LIMD2	8.9194e-08	-0.212059	0.174	0.37	0.00155786	mergedDC
TUBA1A	8.96618e-08	-0.239583	0.212	0.425	0.00156603	mergedDC
RAN	9.36709e-08	-0.190436	0.142	0.323	0.00163606	mergedDC
EDF1	9.48256e-08	-0.246035	0.283	0.512	0.00165622	mergedDC
RAB32	9.62612e-08	-0.150378	0.105	0.268	0.0016813	mergedDC
STK17B	9.67271e-08	0.712816	0.48	0.315	0.00168944	mergedDC
GPR34	9.94107e-08	-0.107298	0.03	0.126	0.00173631	mergedDC
GRINA	1.00562e-07	-0.191116	0.168	0.362	0.00175642	mergedDC
LRCH4	1.01493e-07	-0.114754	0.037	0.142	0.00177268	mergedDC
MYDGF	1.02863e-07	-0.151778	0.135	0.315	0.00179661	mergedDC
TAOK3	1.02942e-07	-0.137847	0.142	0.331	0.00179798	mergedDC
STUB1	1.05634e-07	-0.118373	0.068	0.205	0.001845	mergedDC
CCL3	1.05989e-07	-0.135948	0.006	0.055	0.0018512	mergedDC
PPP2R5C	1.10125e-07	0.445387	0.282	0.071	0.00192345	mergedDC
RAP2B	1.11542e-07	0.566021	0.385	0.189	0.00194818	mergedDC
NR1H2	1.12032e-07	-0.101102	0.045	0.157	0.00195675	mergedDC
RARRES3	1.14219e-07	-0.236314	0.151	0.331	0.00199495	mergedDC
KRTCAP2	1.17545e-07	-0.146972	0.13	0.307	0.00205304	mergedDC
ANXA5	1.23815e-07	-0.161831	0.143	0.331	0.00216256	mergedDC
INSR	1.3063e-07	0.529528	0.273	0.071	0.00228158	mergedDC
UBXN1	1.32518e-07	-0.193296	0.202	0.409	0.00231455	mergedDC
ADAM17	1.33525e-07	0.41655	0.237	0.039	0.00233215	mergedDC
CYC1	1.3998e-07	-0.128104	0.078	0.22	0.00244489	mergedDC
ANKRD22	1.45139e-07	-0.224638	0.171	0.362	0.00253499	mergedDC
BAX	1.50088e-07	-0.153537	0.111	0.276	0.00262143	mergedDC
PHC2	1.50959e-07	-0.136482	0.101	0.26	0.00263665	mergedDC
CXCL16	1.51005e-07	-0.146919	0.111	0.276	0.00263745	mergedDC
PIP4K2A	1.53825e-07	0.478367	0.276	0.071	0.00268671	mergedDC
FGR	1.54117e-07	-0.138604	0.096	0.252	0.0026918	mergedDC
SCPEP1	1.55253e-07	-0.125707	0.078	0.22	0.00271166	mergedDC
GUK1	1.55432e-07	-0.206216	0.378	0.63	0.00271477	mergedDC
FIS1	1.61008e-07	-0.136299	0.102	0.26	0.00281216	mergedDC
FTL	1.63548e-07	-0.313779	0.993	0.992	0.00285653	mergedDC
CTSA	1.68426e-07	-0.130593	0.087	0.236	0.00294173	mergedDC
CIRBP	1.70456e-07	-0.173249	0.231	0.449	0.00297718	mergedDC
NMI	1.70979e-07	-0.13833	0.106	0.268	0.00298631	mergedDC
CTSH	1.87332e-07	-0.19648	0.206	0.417	0.00327194	mergedDC
HIGD2A	1.91091e-07	-0.199418	0.302	0.543	0.0033376	mergedDC
ATP6V1F	1.92451e-07	-0.216635	0.26	0.48	0.00336135	mergedDC
BCL10	1.95825e-07	0.433561	0.269	0.071	0.00342027	mergedDC
HNRNPK	2.02457e-07	-0.169177	0.199	0.409	0.00353612	mergedDC
PPP2CA	2.1572e-07	-0.103145	0.061	0.189	0.00376777	mergedDC
GIGYF1	2.22128e-07	0.432952	0.201	0.016	0.00387969	mergedDC
CAPNS1	2.28708e-07	-0.153441	0.141	0.323	0.00399461	mergedDC
SNRPD3	2.29597e-07	-0.122447	0.07	0.205	0.00401014	mergedDC
SF3B6	2.31324e-07	-0.209315	0.139	0.307	0.0040403	mergedDC
C1orf162	2.41939e-07	-0.299377	0.356	0.567	0.0042257	mergedDC
MAD2L2	2.42437e-07	-0.120767	0.063	0.189	0.00423441	mergedDC
CTSD	2.43305e-07	-0.170095	0.107	0.268	0.00424956	mergedDC
THAP5	2.4527e-07	0.359665	0.201	0.016	0.00428389	mergedDC
RHOC	2.46472e-07	-0.134016	0.055	0.173	0.00430487	mergedDC
TMEM179B	2.52143e-07	-0.122265	0.084	0.228	0.00440393	mergedDC
ACSL1	2.55919e-07	-0.132729	0.093	0.244	0.00446988	mergedDC
LSM12	2.58025e-07	0.404034	0.25	0.055	0.00450667	mergedDC
TMED4	2.60799e-07	0.375307	0.231	0.039	0.00455512	mergedDC
SAR1A	2.67522e-07	0.515559	0.291	0.094	0.00467254	mergedDC
CASP4	2.68859e-07	-0.183714	0.21	0.417	0.00469589	mergedDC
HMGN1	2.69012e-07	-0.18225	0.356	0.622	0.00469856	mergedDC
VDAC1	2.69131e-07	-0.133807	0.146	0.331	0.00470063	mergedDC
POLR2E	2.80206e-07	-0.128461	0.092	0.244	0.00489407	mergedDC
EIF6	2.83688e-07	-0.100259	0.054	0.173	0.00495489	mergedDC
BLOC1S1	2.89037e-07	-0.209868	0.292	0.528	0.00504832	mergedDC
PDXK	2.91033e-07	-0.104562	0.062	0.189	0.00508318	mergedDC
GNAI2	3.02068e-07	0.604524	0.557	0.417	0.00527592	mergedDC
RASSF4	3.06468e-07	-0.188463	0.115	0.276	0.00535277	mergedDC
SMAP2	3.12733e-07	-0.188241	0.287	0.52	0.0054622	mergedDC
CLEC10A	3.14165e-07	-0.209681	0.188	0.386	0.0054872	mergedDC
CYB5A	3.16902e-07	-0.114956	0.059	0.181	0.00553502	mergedDC
IL1R2	3.22847e-07	-0.273869	0.174	0.362	0.00563884	mergedDC
HMGB2	3.23033e-07	-0.213749	0.232	0.441	0.0056421	mergedDC
FCGR2A	3.32029e-07	-0.208608	0.235	0.449	0.00579922	mergedDC
PSMB6	3.4826e-07	-0.122447	0.076	0.213	0.00608271	mergedDC
HLA-DMB	3.75948e-07	-0.225852	0.244	0.457	0.0065663	mergedDC
SLC35F6	3.7988e-07	0.455385	0.228	0.039	0.00663499	mergedDC
CDV3	3.84078e-07	-0.124129	0.121	0.291	0.00670831	mergedDC
SQSTM1	3.85922e-07	-0.137109	0.077	0.213	0.00674051	mergedDC
BANF1	3.92273e-07	-0.128325	0.073	0.205	0.00685144	mergedDC
POMP	4.12039e-07	-0.182234	0.369	0.63	0.00719668	mergedDC
SNX10	4.22987e-07	-0.268749	0.223	0.402	0.00738789	mergedDC
ST3GAL1	4.31309e-07	-0.11146	0.048	0.157	0.00753325	mergedDC
COX7B	4.34607e-07	-0.208278	0.31	0.535	0.00759084	mergedDC
IRF2BPL	4.3992e-07	0.443348	0.253	0.063	0.00768363	mergedDC
PPIB	4.40099e-07	-0.176797	0.233	0.449	0.00768678	mergedDC
ATP6AP2	4.56837e-07	-0.155916	0.122	0.283	0.00797912	mergedDC
JAK3	4.59601e-07	0.4536	0.254	0.063	0.0080274	mergedDC
MSR1	4.60434e-07	0.919122	0.326	0.134	0.00804194	mergedDC
SKP1	4.75091e-07	-0.146624	0.171	0.362	0.00829794	mergedDC
ATP6V1B2	5.09969e-07	-0.127671	0.087	0.228	0.00890712	mergedDC
EPSTI1	5.20159e-07	-0.209799	0.259	0.472	0.00908509	mergedDC
HAX1	5.22914e-07	-0.115561	0.064	0.189	0.00913322	mergedDC
RHEB	5.5362e-07	-0.168042	0.128	0.291	0.00966953	mergedDC
NINJ1	6.00558e-07	-0.108262	0.064	0.189	0.0104894	mergedDC
ISCU	6.08144e-07	-0.155864	0.132	0.299	0.0106218	mergedDC
APBB1IP	6.65339e-07	-0.118727	0.09	0.236	0.0116208	mergedDC
HLA-DRB5	6.72695e-07	0.40616	0.189	0.016	0.0117493	mergedDC
CEBPD	6.81698e-07	-0.295691	0.292	0.512	0.0119065	mergedDC
COX14	6.88153e-07	-0.149774	0.165	0.346	0.0120193	mergedDC
FGL2	6.91319e-07	-0.226548	0.315	0.551	0.0120746	mergedDC
MANF	7.13005e-07	-0.119918	0.078	0.213	0.0124533	mergedDC
CNIH4	7.2115e-07	-0.192549	0.137	0.299	0.0125956	mergedDC
SPINT2	7.40367e-07	-0.149774	0.152	0.331	0.0129313	mergedDC
CYTIP	7.41146e-07	-0.154648	0.095	0.236	0.0129449	mergedDC
PLSCR1	7.41176e-07	-0.202954	0.221	0.417	0.0129454	mergedDC
CSGALNACT2	7.42456e-07	-0.108907	0.065	0.189	0.0129677	mergedDC
AC005921.2	7.42678e-07	0.336421	0.189	0.016	0.0129716	mergedDC
RGS10	7.60487e-07	-0.136661	0.356	0.63	0.0132827	mergedDC
RHOB	7.61182e-07	-0.129236	0.033	0.126	0.0132948	mergedDC
PPP1CA	9.04862e-07	-0.202489	0.139	0.299	0.0158043	mergedDC
ATP5PO	9.12308e-07	-0.17986	0.204	0.394	0.0159344	mergedDC
VOPP1	9.1876e-07	-0.135651	0.076	0.205	0.0160471	mergedDC
RTN4	9.29605e-07	-0.152898	0.238	0.457	0.0162365	mergedDC
HNRNPC	9.50715e-07	-0.168848	0.166	0.346	0.0166052	mergedDC
AC106707.1	9.57041e-07	0.310328	0.186	0.016	0.0167157	mergedDC
IDH3G	1.02314e-06	-0.106864	0.062	0.181	0.0178702	mergedDC
RNASE6	1.02853e-06	-0.304952	0.256	0.433	0.0179643	mergedDC
CD33	1.06464e-06	-0.107348	0.07	0.197	0.0185951	mergedDC
HLA-A	1.07356e-06	-0.268367	0.794	0.906	0.0187508	mergedDC
PREX1	1.11385e-06	-0.10147	0.079	0.213	0.0194545	mergedDC
LAMP3	1.13677e-06	-0.213584	0.028	0.11	0.0198549	mergedDC
HLA-DQA1	1.14047e-06	-0.436576	0.448	0.669	0.0199195	mergedDC
CALM2	1.14655e-06	-0.281548	0.49	0.646	0.0200256	mergedDC
WDR1	1.21126e-06	-0.121908	0.09	0.228	0.0211558	mergedDC
FMNL1	1.21352e-06	-0.11998	0.093	0.236	0.0211953	mergedDC
RETREG2	1.22992e-06	0.422949	0.241	0.063	0.0214819	mergedDC
ASAH1	1.24769e-06	-0.175793	0.123	0.276	0.0217922	mergedDC
REL	1.27559e-06	-0.220194	0.238	0.441	0.0222795	mergedDC
TKT	1.27868e-06	-0.162788	0.192	0.386	0.0223335	mergedDC
PSMA2	1.27891e-06	-0.140702	0.136	0.299	0.0223375	mergedDC
VKORC1	1.32589e-06	-0.116459	0.085	0.22	0.023158	mergedDC
WBP11	1.3259e-06	-0.101812	0.046	0.15	0.0231581	mergedDC
SURF1	1.33468e-06	-0.128548	0.068	0.189	0.0233116	mergedDC
TNFRSF14	1.33552e-06	-0.132955	0.11	0.26	0.0233261	mergedDC
SAP30	1.33762e-06	-0.172136	0.115	0.268	0.0233629	mergedDC
TOB1	1.34682e-06	0.482966	0.213	0.039	0.0235236	mergedDC
PIK3CB	1.35386e-06	-0.103952	0.054	0.165	0.0236465	mergedDC
PSMA5	1.50736e-06	-0.114685	0.072	0.197	0.0263276	mergedDC
AKR1A1	1.50756e-06	-0.137429	0.135	0.299	0.0263311	mergedDC
IGBP1	1.53461e-06	-0.131529	0.077	0.205	0.0268035	mergedDC
RAB5C	1.54355e-06	-0.129062	0.123	0.283	0.0269597	mergedDC
MIF	1.55988e-06	-0.420858	0.64	0.701	0.0272449	mergedDC
DDX5	1.60541e-06	-0.1991	0.291	0.504	0.0280401	mergedDC
PRCP	1.63489e-06	-0.101711	0.059	0.173	0.028555	mergedDC
POLR2G	1.73082e-06	-0.114956	0.06	0.173	0.0302305	mergedDC
DYNC1I2	1.75301e-06	-0.145164	0.069	0.189	0.0306181	mergedDC
ARF3	1.75443e-06	-0.122626	0.096	0.236	0.0306429	mergedDC
TSEN34	1.77263e-06	-0.104017	0.051	0.157	0.0309607	mergedDC
CCNG2	1.81843e-06	-0.109543	0.072	0.197	0.0317606	mergedDC
PHPT1	1.82141e-06	-0.14316	0.163	0.339	0.0318128	mergedDC
UBE2L6	1.91566e-06	-0.151434	0.182	0.362	0.033459	mergedDC
PPT1	1.99137e-06	-0.114339	0.16	0.346	0.0347813	mergedDC
ZYX	2.01681e-06	-0.116292	0.235	0.457	0.0352257	mergedDC
ZNF652	2.1486e-06	0.366319	0.209	0.039	0.0375274	mergedDC
NOP53	2.1856e-06	-0.156538	0.253	0.465	0.0381737	mergedDC
TBL1XR1	2.28332e-06	0.372098	0.265	0.087	0.0398804	mergedDC
NOTCH2	2.40751e-06	-0.112968	0.083	0.213	0.0420497	mergedDC
ANKRD40	2.4606e-06	0.296264	0.178	0.016	0.0429769	mergedDC
AXL	2.48065e-06	0.535057	0.209	0.039	0.043327	mergedDC
COX5B	2.5262e-06	-0.186847	0.334	0.559	0.0441225	mergedDC
KIF2A	2.53082e-06	-0.123913	0.061	0.173	0.0442033	mergedDC
RBM6	2.6707e-06	0.441734	0.318	0.142	0.0466464	mergedDC
SLAMF8	2.73729e-06	-0.11879	0.074	0.197	0.0478095	mergedDC
DBNL	2.76984e-06	-0.11168	0.1	0.244	0.048378	mergedDC
ESD	2.81259e-06	-0.124592	0.099	0.236	0.0491247	mergedDC
CALHM6	2.18714e-175	-1.00205	0.236	0.726	3.82006e-171	myeloidLin
IFITM1	3.30186e-155	-0.96351	0.199	0.675	5.76704e-151	myeloidLin
HLA-B	2.39882e-129	-0.547018	0.968	0.995	4.18977e-125	myeloidLin
TYMP	2.5612e-126	-0.840485	0.528	0.841	4.4734e-122	myeloidLin
B2M	5.08903e-114	-0.417327	1	1	8.88851e-110	myeloidLin
BRI3	8.21644e-110	-0.619072	0.221	0.625	1.43508e-105	myeloidLin
GAPDH	6.53438e-106	-0.59616	0.958	0.998	1.14129e-101	myeloidLin
GBP5	1.86594e-105	-0.732024	0.288	0.68	3.25905e-101	myeloidLin
GABARAP	1.07273e-99	-0.614387	0.294	0.669	1.87363e-95	myeloidLin
HLA-A	1.10124e-99	-0.623101	0.708	0.923	1.92342e-95	myeloidLin
HLA-DRB1	7.05687e-97	-0.729394	0.738	0.952	1.23255e-92	myeloidLin
UBC	1.52806e-95	-0.527882	0.31	0.728	2.66891e-91	myeloidLin
CHCHD10	7.77098e-92	-0.29252	0.044	0.318	1.35728e-87	myeloidLin
VIM	2.40714e-91	-0.616542	0.794	0.956	4.20431e-87	myeloidLin
RAC1	7.93719e-89	-0.547839	0.303	0.662	1.38631e-84	myeloidLin
SOCS1	3.22139e-88	-0.333556	0.047	0.316	5.62648e-84	myeloidLin
IL1R2	1.34186e-85	-0.680634	0.221	0.59	2.34369e-81	myeloidLin
HLA-C	1.32958e-82	-0.466723	0.819	0.954	2.32224e-78	myeloidLin
MALAT1	3.16413e-81	-0.442039	0.999	0.989	5.52647e-77	myeloidLin
IFITM3	4.56051e-81	-0.622839	0.718	0.88	7.96539e-77	myeloidLin
PSMB9	5.53777e-78	-0.470189	0.471	0.81	9.67227e-74	myeloidLin
CD163	7.06248e-77	-0.664763	0.646	0.823	1.23353e-72	myeloidLin
ATP5F1D	2.38651e-76	-0.334314	0.138	0.467	4.16827e-72	myeloidLin
AC020656.1	5.05028e-75	1.53974	0.52	0.118	8.82082e-71	myeloidLin
PPDPF	3.06488e-72	-0.449832	0.437	0.775	5.35312e-68	myeloidLin
IGFLR1	7.10037e-72	-0.295166	0.086	0.366	1.24015e-67	myeloidLin
CEBPD	5.32922e-71	-0.578958	0.392	0.695	9.30801e-67	myeloidLin
SH3BGRL3	2.2199e-70	0.438835	0.991	0.98	3.87728e-66	myeloidLin
CTSL	2.3228e-70	-0.385429	0.128	0.434	4.057e-66	myeloidLin
FCGR1A	1.69378e-67	-0.433156	0.327	0.664	2.95836e-63	myeloidLin
C4orf48	4.63582e-64	-0.311337	0.144	0.443	8.09692e-60	myeloidLin
SAP30	6.40173e-64	-0.40536	0.205	0.518	1.11813e-59	myeloidLin
NME2	1.91482e-61	-0.194995	0.036	0.236	3.34443e-57	myeloidLin
FCGR1B	2.45321e-59	-0.348966	0.195	0.498	4.28478e-55	myeloidLin
ENO1	1.31889e-58	-0.3807	0.599	0.88	2.30358e-54	myeloidLin
PSMB10	7.26155e-58	-0.312334	0.177	0.475	1.2683e-53	myeloidLin
ALDOA	1.15315e-57	-0.287723	0.12	0.392	2.01409e-53	myeloidLin
RNF145	2.26089e-56	-0.277945	0.105	0.361	3.94887e-52	myeloidLin
IFI30	2.98125e-56	-0.451451	0.326	0.626	5.20705e-52	myeloidLin
IFITM2	3.17568e-56	-0.517348	0.749	0.885	5.54664e-52	myeloidLin
NUCB1	4.32634e-56	-0.246844	0.116	0.384	7.55639e-52	myeloidLin
APOL4	1.09752e-55	-0.204956	0.047	0.248	1.91693e-51	myeloidLin
GBP2	2.03946e-53	-0.355555	0.303	0.615	3.56212e-49	myeloidLin
SERPINA1	8.82837e-53	-0.435301	0.434	0.713	1.54196e-48	myeloidLin
SECTM1	5.1213e-52	-0.241833	0.11	0.361	8.94486e-48	myeloidLin
EEF1G	2.97135e-51	-0.147561	0.023	0.177	5.18975e-47	myeloidLin
VSIG4	3.00707e-51	-0.363961	0.197	0.474	5.25215e-47	myeloidLin
CEBPB	3.34098e-51	-0.534958	0.46	0.69	5.83536e-47	myeloidLin
SERPING1	3.37016e-51	-0.346187	0.21	0.489	5.88633e-47	myeloidLin
ASCL2	7.36305e-50	-0.15776	0.031	0.197	1.28603e-45	myeloidLin
GNS	2.17044e-49	-0.29437	0.21	0.495	3.79089e-45	myeloidLin
CTSS	5.45745e-48	-0.429374	0.73	0.859	9.53198e-44	myeloidLin
RNASEK	1.28101e-47	-0.191753	0.078	0.295	2.23741e-43	myeloidLin
CD53	1.61895e-47	-0.341185	0.407	0.692	2.82766e-43	myeloidLin
RNF187	2.07901e-47	-0.201747	0.07	0.275	3.6312e-43	myeloidLin
LYZ	2.49504e-47	0.286842	0.901	0.803	4.35784e-43	myeloidLin
RARRES3	3.39518e-47	-0.337048	0.286	0.57	5.93001e-43	myeloidLin
CREG1	5.03579e-47	-0.21357	0.085	0.302	8.79551e-43	myeloidLin
PSME1	6.78217e-47	-0.33508	0.515	0.78	1.18457e-42	myeloidLin
CTSD	1.06909e-46	-0.373053	0.314	0.608	1.86728e-42	myeloidLin
EHBP1L1	1.48294e-46	-0.164315	0.044	0.221	2.5901e-42	myeloidLin
HK2	1.54109e-46	-0.449506	0.248	0.51	2.69167e-42	myeloidLin
IDO1	5.83931e-45	-0.138487	0.018	0.149	1.01989e-40	myeloidLin
HLA-E	8.7805e-45	-0.31108	0.618	0.851	1.5336e-40	myeloidLin
MYL6	1.62276e-44	-0.300857	0.871	0.969	2.83432e-40	myeloidLin
NCF1	3.47526e-44	-0.381692	0.299	0.574	6.06989e-40	myeloidLin
LAPTM5	4.67351e-44	-0.354114	0.668	0.852	8.16275e-40	myeloidLin
PKM	5.88715e-44	-0.334842	0.498	0.775	1.02825e-39	myeloidLin
LYL1	1.72793e-43	-0.142228	0.034	0.189	3.018e-39	myeloidLin
FCGR2B	1.97888e-43	-0.322759	0.135	0.367	3.45631e-39	myeloidLin
FCGR2A	2.9596e-43	-0.369091	0.464	0.71	5.16924e-39	myeloidLin
GLUL	1.21834e-41	-0.620286	0.69	0.821	2.12796e-37	myeloidLin
CTSZ	1.74269e-41	-0.317929	0.293	0.557	3.04378e-37	myeloidLin
RAB13	5.31825e-41	-0.249745	0.12	0.343	9.28885e-37	myeloidLin
TRAPPC5	7.10245e-41	-0.122538	0.022	0.152	1.24051e-36	myeloidLin
PDXK	1.17937e-40	-0.207171	0.106	0.32	2.05989e-36	myeloidLin
S100A6	1.82713e-40	-0.343174	0.988	0.975	3.19127e-36	myeloidLin
HEBP2	2.99863e-39	-0.175683	0.073	0.261	5.2374e-35	myeloidLin
CYBA	6.0512e-39	-0.315277	0.874	0.957	1.0569e-34	myeloidLin
IFI6	7.85413e-39	-0.371887	0.575	0.779	1.3718e-34	myeloidLin
CAPG	2.01635e-38	-0.201241	0.099	0.303	3.52175e-34	myeloidLin
EEF1B2	3.86252e-38	0.360488	0.686	0.444	6.74627e-34	myeloidLin
POLD4	8.40963e-38	-0.161364	0.058	0.226	1.46883e-33	myeloidLin
TCN2	3.35238e-37	-0.182066	0.09	0.284	5.85527e-33	myeloidLin
MFGE8	2.91024e-36	-0.117676	0.022	0.143	5.08303e-32	myeloidLin
TMBIM6	1.66744e-35	-0.258239	0.41	0.684	2.91235e-31	myeloidLin
APLP2	2.74853e-35	-0.305645	0.446	0.684	4.80058e-31	myeloidLin
C7orf50	3.15954e-35	-0.274335	0.257	0.502	5.51846e-31	myeloidLin
TMA7	4.09181e-35	0.359327	0.819	0.626	7.14675e-31	myeloidLin
CHPT1	5.9342e-35	-0.158209	0.064	0.23	1.03647e-30	myeloidLin
IL10RB	5.94507e-35	-0.148531	0.056	0.215	1.03837e-30	myeloidLin
APBB1IP	7.34733e-35	-0.193668	0.133	0.346	1.28328e-30	myeloidLin
FAM50A	1.53316e-34	-0.14626	0.058	0.218	2.67781e-30	myeloidLin
TAP1	1.72334e-34	-0.243638	0.227	0.461	3.00999e-30	myeloidLin
NBEAL1	1.96681e-34	0.315139	0.316	0.075	3.43524e-30	myeloidLin
IL1RN	2.95847e-34	-0.207212	0.089	0.27	5.16727e-30	myeloidLin
HIF1A-AS2	3.90157e-34	-0.231085	0.096	0.28	6.81448e-30	myeloidLin
PFDN5	8.77233e-34	0.31055	0.938	0.851	1.53218e-29	myeloidLin
RNASE6	9.12515e-34	-0.325561	0.289	0.518	1.5938e-29	myeloidLin
OST4	1.67706e-33	0.305324	0.811	0.656	2.92915e-29	myeloidLin
RAPGEF2	4.12093e-33	-0.153932	0.072	0.239	7.19762e-29	myeloidLin
ITGB2	4.83744e-33	-0.281545	0.325	0.577	8.44907e-29	myeloidLin
NAGK	5.45592e-33	-0.184472	0.126	0.328	9.52931e-29	myeloidLin
ANKRD22	8.68327e-33	-0.265873	0.213	0.436	1.51662e-28	myeloidLin
JUN	8.93167e-33	-0.20526	0.058	0.211	1.56001e-28	myeloidLin
SLC16A3	1.49431e-32	-0.291197	0.342	0.572	2.60997e-28	myeloidLin
SLC3A2	1.90406e-32	-0.1413	0.055	0.205	3.32564e-28	myeloidLin
ISG20	5.07591e-32	-0.270684	0.25	0.49	8.86558e-28	myeloidLin
DYNC1I2	6.40582e-32	-0.199913	0.149	0.356	1.11884e-27	myeloidLin
TPI1	7.08341e-32	-0.29859	0.717	0.885	1.23719e-27	myeloidLin
PTPN6	7.57858e-32	-0.194064	0.143	0.348	1.32367e-27	myeloidLin
BLVRB	9.66563e-32	-0.261795	0.192	0.403	1.6882e-27	myeloidLin
P4HB	1.19751e-31	-0.247278	0.285	0.521	2.09158e-27	myeloidLin
CD68	1.48331e-31	-0.253539	0.301	0.538	2.59075e-27	myeloidLin
LGALS3BP	1.94207e-31	-0.126778	0.035	0.161	3.39203e-27	myeloidLin
HPCAL1	2.67764e-31	-0.145132	0.062	0.216	4.67676e-27	myeloidLin
PIK3AP1	3.25847e-31	-0.256655	0.271	0.498	5.69124e-27	myeloidLin
FTH1	3.66774e-31	0.408961	0.999	1	6.40608e-27	myeloidLin
HLA-DRA	6.37935e-31	-0.306954	0.925	0.962	1.11422e-26	myeloidLin
S100A10	1.70353e-30	-0.348286	0.803	0.892	2.97539e-26	myeloidLin
LGALS3	1.86006e-30	-0.221659	0.158	0.359	3.24879e-26	myeloidLin
TSC22D3	2.66184e-30	-0.252217	0.253	0.479	4.64916e-26	myeloidLin
COTL1	5.12752e-30	-0.292093	0.592	0.767	8.95573e-26	myeloidLin
TMSB4X	5.45615e-30	0.258601	1	1	9.52972e-26	myeloidLin
HSP90B1	7.80941e-30	-0.285597	0.369	0.597	1.36399e-25	myeloidLin
CD74	1.20202e-29	-0.340352	0.919	0.974	2.09945e-25	myeloidLin
DUSP1	1.50894e-29	-0.305047	0.407	0.633	2.63552e-25	myeloidLin
PDIA3	1.55686e-29	-0.243626	0.282	0.508	2.71921e-25	myeloidLin
CD63	1.92579e-29	-0.345146	0.586	0.761	3.36359e-25	myeloidLin
HSPA5	2.50684e-29	-0.314691	0.289	0.51	4.37845e-25	myeloidLin
FAM173A	2.689e-29	-0.102099	0.024	0.131	4.69661e-25	myeloidLin
MIF	4.40549e-29	-0.435773	0.831	0.869	7.69463e-25	myeloidLin
AC103591.3	4.44727e-29	-0.137347	0.026	0.133	7.76759e-25	myeloidLin
C18orf32	7.61084e-29	-0.137442	0.065	0.213	1.32931e-24	myeloidLin
CDKN1A	9.67055e-29	-0.183737	0.123	0.308	1.68906e-24	myeloidLin
TAF10	1.55434e-28	-0.118343	0.04	0.164	2.71482e-24	myeloidLin
FOS	1.61714e-28	-0.404326	0.509	0.725	2.8245e-24	myeloidLin
ATP5F1E	2.65428e-28	0.273531	0.992	0.979	4.63597e-24	myeloidLin
MYL12B	4.54475e-28	-0.231397	0.37	0.613	7.93787e-24	myeloidLin
RNASE1	4.78089e-28	-0.213925	0.039	0.159	8.3503e-24	myeloidLin
GAA	4.94408e-28	-0.129096	0.056	0.195	8.63533e-24	myeloidLin
KCNMA1	5.39757e-28	-0.192198	0.14	0.33	9.42739e-24	myeloidLin
UBB	6.05461e-28	-0.324406	0.222	0.426	1.0575e-23	myeloidLin
CDV3	6.85272e-28	-0.179175	0.14	0.33	1.1969e-23	myeloidLin
LACTB	1.06691e-27	-0.154442	0.119	0.3	1.86346e-23	myeloidLin
SLC16A6	2.04044e-27	-0.12318	0.037	0.154	3.56384e-23	myeloidLin
PLIN2	2.28214e-27	-0.422578	0.254	0.457	3.98599e-23	myeloidLin
PSMB3	2.45587e-27	-0.200031	0.259	0.485	4.28943e-23	myeloidLin
BTF3	3.12252e-27	0.276138	0.777	0.603	5.45379e-23	myeloidLin
MAP2K2	3.73387e-27	-0.12577	0.061	0.202	6.52158e-23	myeloidLin
RGS2	4.74101e-27	-0.206718	0.096	0.259	8.28065e-23	myeloidLin
IL18BP	5.33136e-27	-0.164199	0.092	0.252	9.31175e-23	myeloidLin
XIST	6.13603e-27	-0.176591	0.191	0.403	1.07172e-22	myeloidLin
GRN	6.93469e-27	-0.270073	0.338	0.546	1.21121e-22	myeloidLin
NMT1	8.43385e-27	-0.155948	0.09	0.248	1.47306e-22	myeloidLin
PNRC1	8.56715e-27	-0.295381	0.296	0.503	1.49634e-22	myeloidLin
PLEKHO1	1.04559e-26	-0.25777	0.272	0.484	1.82622e-22	myeloidLin
CALM3	1.21856e-26	-0.232121	0.372	0.6	2.12833e-22	myeloidLin
PGP	1.79079e-26	-0.100244	0.024	0.123	3.12779e-22	myeloidLin
NENF	3.71651e-26	-0.11154	0.036	0.149	6.49126e-22	myeloidLin
CFL1	3.80285e-26	-0.270604	0.883	0.943	6.64207e-22	myeloidLin
SNX10	4.86385e-26	-0.297944	0.485	0.656	8.4952e-22	myeloidLin
SDF4	6.67601e-26	-0.107107	0.04	0.157	1.16603e-21	myeloidLin
CTSA	8.52275e-26	-0.169463	0.133	0.31	1.48858e-21	myeloidLin
MYL12A	8.64028e-26	-0.21134	0.544	0.759	1.50911e-21	myeloidLin
H1FX	8.85971e-26	-0.122892	0.042	0.161	1.54744e-21	myeloidLin
ARPC3	9.75681e-26	-0.247686	0.66	0.826	1.70412e-21	myeloidLin
SRSF9	1.17332e-25	-0.18811	0.208	0.411	2.04931e-21	myeloidLin
UGP2	1.34703e-25	-0.224717	0.234	0.433	2.35273e-21	myeloidLin
LYSMD2	1.8463e-25	-0.130237	0.068	0.208	3.22474e-21	myeloidLin
RACK1	2.1867e-25	0.237712	0.883	0.734	3.81929e-21	myeloidLin
LGALS2	3.01449e-25	0.268534	0.28	0.079	5.2651e-21	myeloidLin
SERF2	5.80885e-25	0.214496	0.997	0.99	1.01457e-20	myeloidLin
SIGLEC10	8.53836e-25	-0.155427	0.099	0.256	1.49131e-20	myeloidLin
TLR8	1.22357e-24	-0.128751	0.078	0.223	2.13709e-20	myeloidLin
NCF2	1.32831e-24	-0.220488	0.283	0.487	2.32003e-20	myeloidLin
GBP1	1.386e-24	-0.32134	0.53	0.697	2.42079e-20	myeloidLin
CTNNBL1	1.78544e-24	-0.115671	0.056	0.184	3.11845e-20	myeloidLin
SQOR	1.85464e-24	-0.197007	0.206	0.397	3.23931e-20	myeloidLin
TNFRSF1B	1.95052e-24	-0.23383	0.283	0.492	3.40678e-20	myeloidLin
NDRG1	2.63827e-24	-0.210936	0.138	0.307	4.60801e-20	myeloidLin
PSME2	3.0393e-24	-0.253144	0.554	0.736	5.30844e-20	myeloidLin
ITM2B	3.07283e-24	-0.21134	0.678	0.841	5.36701e-20	myeloidLin
SCIMP	3.22397e-24	-0.16333	0.15	0.33	5.63099e-20	myeloidLin
EVI2A	3.9147e-24	-0.203989	0.212	0.407	6.83742e-20	myeloidLin
GM2A	5.18166e-24	-0.150738	0.13	0.302	9.05028e-20	myeloidLin
ADAM28	6.42948e-24	-0.174809	0.112	0.272	1.12297e-19	myeloidLin
EGR1	7.60456e-24	-0.221494	0.271	0.474	1.32821e-19	myeloidLin
LAP3	7.86517e-24	-0.23786	0.535	0.726	1.37373e-19	myeloidLin
MAP3K7CL	1.04537e-23	-0.202687	0.19	0.379	1.82584e-19	myeloidLin
PGK1	1.32221e-23	-0.228153	0.626	0.836	2.30937e-19	myeloidLin
VSIR	1.79317e-23	-0.210386	0.353	0.557	3.13195e-19	myeloidLin
RAB7A	1.85292e-23	-0.180901	0.255	0.461	3.23632e-19	myeloidLin
ZNF395	2.32902e-23	-0.212344	0.151	0.32	4.06786e-19	myeloidLin
LSP1	3.2545e-23	-0.226365	0.306	0.511	5.68431e-19	myeloidLin
ALOX5	3.37779e-23	-0.173368	0.178	0.362	5.89964e-19	myeloidLin
ARF1	3.85844e-23	-0.183139	0.296	0.508	6.73915e-19	myeloidLin
SPI1	4.14575e-23	-0.209149	0.299	0.5	7.24096e-19	myeloidLin
ITM2C	4.64267e-23	-0.115499	0.008	0.072	8.10888e-19	myeloidLin
DDT	4.6978e-23	-0.212632	0.31	0.507	8.20518e-19	myeloidLin
ZFP36	4.70554e-23	-0.268258	0.385	0.589	8.21869e-19	myeloidLin
APOL1	4.96303e-23	-0.11212	0.052	0.17	8.66843e-19	myeloidLin
RAB5C	6.28654e-23	-0.170747	0.19	0.375	1.09801e-18	myeloidLin
RAB5IF	7.72933e-23	-0.194069	0.246	0.444	1.35001e-18	myeloidLin
CD86	8.75021e-23	-0.153025	0.171	0.354	1.52831e-18	myeloidLin
LCP1	1.13119e-22	-0.214969	0.463	0.659	1.97573e-18	myeloidLin
MXI1	1.17345e-22	-0.234625	0.176	0.348	2.04955e-18	myeloidLin
PPIB	1.23181e-22	-0.204467	0.299	0.498	2.15149e-18	myeloidLin
CLEC2B	1.55097e-22	-0.211449	0.267	0.461	2.70892e-18	myeloidLin
FGL2	1.91973e-22	-0.303415	0.542	0.692	3.35301e-18	myeloidLin
AP2S1	2.19824e-22	-0.221084	0.487	0.692	3.83945e-18	myeloidLin
SQSTM1	2.65203e-22	-0.147478	0.101	0.249	4.63204e-18	myeloidLin
DAP	2.7861e-22	-0.11739	0.064	0.19	4.86621e-18	myeloidLin
TALDO1	3.59323e-22	-0.177133	0.164	0.336	6.27593e-18	myeloidLin
HLA-DMB	3.61111e-22	-0.208794	0.26	0.449	6.30716e-18	myeloidLin
FCER1G	4.36789e-22	-0.22619	0.911	0.903	7.62896e-18	myeloidLin
SASH3	5.09641e-22	-0.150607	0.122	0.279	8.9014e-18	myeloidLin
CTSB	9.54274e-22	-0.322574	0.721	0.808	1.66674e-17	myeloidLin
ERGIC1	1.07176e-21	-0.149127	0.14	0.305	1.87193e-17	myeloidLin
BTG1	1.09378e-21	-0.227935	0.325	0.528	1.9104e-17	myeloidLin
DNAJC15	1.16749e-21	-0.179725	0.252	0.443	2.03914e-17	myeloidLin
RBMX	1.33183e-21	-0.160358	0.156	0.323	2.32617e-17	myeloidLin
FAU	1.56478e-21	0.218066	0.99	0.977	2.73304e-17	myeloidLin
RAB11B	1.5806e-21	-0.115603	0.068	0.193	2.76067e-17	myeloidLin
LRRK2	1.63145e-21	-0.195245	0.212	0.389	2.8495e-17	myeloidLin
EVI2B	1.73517e-21	-0.21282	0.337	0.533	3.03066e-17	myeloidLin
EGLN3	1.80141e-21	-0.108931	0.037	0.138	3.14634e-17	myeloidLin
CUL1	1.80671e-21	-0.11899	0.081	0.216	3.1556e-17	myeloidLin
SLC15A4	1.94594e-21	-0.112493	0.065	0.189	3.39878e-17	myeloidLin
NUCB2	2.16144e-21	-0.132971	0.069	0.193	3.77517e-17	myeloidLin
B4GALT1	3.79185e-21	0.347313	0.243	0.074	6.62285e-17	myeloidLin
ANXA2	5.50991e-21	-0.186725	0.351	0.561	9.62361e-17	myeloidLin
SORT1	5.78733e-21	-0.129658	0.091	0.23	1.01081e-16	myeloidLin
PSTPIP2	6.76053e-21	-0.208992	0.276	0.461	1.18079e-16	myeloidLin
MARCO	7.50375e-21	-0.123892	0.173	0.349	1.31061e-16	myeloidLin
CXCR4	7.98733e-21	-0.241069	0.235	0.416	1.39507e-16	myeloidLin
FOSB	9.53595e-21	-0.102316	0.023	0.107	1.66555e-16	myeloidLin
ALDH2	1.00223e-20	-0.139569	0.099	0.239	1.75049e-16	myeloidLin
CNBP	1.01033e-20	-0.178987	0.313	0.515	1.76464e-16	myeloidLin
H2AFY	1.09066e-20	-0.181855	0.446	0.654	1.90494e-16	myeloidLin
PHC2	1.16556e-20	-0.195049	0.262	0.449	2.03577e-16	myeloidLin
MANF	1.18134e-20	-0.178575	0.168	0.333	2.06333e-16	myeloidLin
JUNB	1.30854e-20	-0.266823	0.414	0.611	2.2855e-16	myeloidLin
PTK2B	1.41175e-20	-0.138	0.11	0.256	2.46576e-16	myeloidLin
AOAH	1.44806e-20	-0.106148	0.05	0.159	2.52918e-16	myeloidLin
PRDX2	1.88994e-20	-0.12826	0.06	0.175	3.30098e-16	myeloidLin
CAPZB	1.96996e-20	-0.185612	0.285	0.474	3.44073e-16	myeloidLin
ATP5F1B	2.70371e-20	-0.172396	0.169	0.331	4.7223e-16	myeloidLin
C3AR1	3.36905e-20	-0.151048	0.16	0.326	5.88438e-16	myeloidLin
MX2	3.74741e-20	-0.183658	0.197	0.369	6.54523e-16	myeloidLin
PTPRC	4.11773e-20	-0.190757	0.492	0.703	7.19203e-16	myeloidLin
ESYT2	4.92508e-20	-0.101494	0.047	0.152	8.60215e-16	myeloidLin
TNFSF10	6.01521e-20	-0.240953	0.409	0.585	1.05062e-15	myeloidLin
LHFPL2	6.04792e-20	-0.11406	0.065	0.184	1.05633e-15	myeloidLin
RNF130	6.32646e-20	-0.183929	0.31	0.5	1.10498e-15	myeloidLin
PSAP	7.06109e-20	-0.245715	0.721	0.828	1.23329e-15	myeloidLin
ITGAM	8.14016e-20	-0.137293	0.153	0.315	1.42176e-15	myeloidLin
MYOF	9.25998e-20	-0.134891	0.132	0.285	1.61735e-15	myeloidLin
MT1E	9.71344e-20	-0.256915	0.077	0.2	1.69655e-15	myeloidLin
ZNF90	1.62838e-19	0.130197	0.128	0.003	2.84412e-15	myeloidLin
SAMSN1	1.82062e-19	-0.190993	0.333	0.525	3.17989e-15	myeloidLin
ANXA6	1.89685e-19	-0.115189	0.073	0.193	3.31305e-15	myeloidLin
TMEM140	2.26484e-19	-0.106316	0.046	0.148	3.95576e-15	myeloidLin
RNF149	2.3387e-19	-0.185579	0.301	0.487	4.08477e-15	myeloidLin
RHOA	2.49251e-19	-0.189448	0.592	0.782	4.35341e-15	myeloidLin
RHOBTB3	2.51709e-19	-0.108936	0.046	0.148	4.39635e-15	myeloidLin
MAP1LC3B	2.53722e-19	-0.209624	0.282	0.461	4.4315e-15	myeloidLin
CD46	2.62029e-19	-0.123908	0.097	0.231	4.5766e-15	myeloidLin
NDUFS2	3.12351e-19	-0.101622	0.061	0.174	5.45553e-15	myeloidLin
POLR2G	3.24399e-19	-0.118837	0.099	0.234	5.66595e-15	myeloidLin
COPE	3.39199e-19	-0.161829	0.266	0.454	5.92444e-15	myeloidLin
CDC42	4.75168e-19	0.619917	0.61	0.485	8.29928e-15	myeloidLin
MARCH1	6.62347e-19	-0.224943	0.532	0.697	1.15686e-14	myeloidLin
RHOU	7.64957e-19	-0.103367	0.053	0.159	1.33607e-14	myeloidLin
CAPZA1	7.90676e-19	0.379338	0.553	0.402	1.38099e-14	myeloidLin
DPYD	7.95519e-19	-0.164296	0.201	0.366	1.38945e-14	myeloidLin
SLC25A37	8.347e-19	-0.303114	0.402	0.564	1.45789e-14	myeloidLin
CSNK2B	8.52576e-19	-0.163638	0.222	0.393	1.48911e-14	myeloidLin
GRB2	8.91961e-19	-0.188912	0.349	0.534	1.5579e-14	myeloidLin
CNDP2	9.49324e-19	-0.156985	0.19	0.356	1.65809e-14	myeloidLin
PGAM1	9.86155e-19	-0.176783	0.392	0.587	1.72242e-14	myeloidLin
NCF4	1.18306e-18	-0.119548	0.098	0.231	2.06634e-14	myeloidLin
GSTK1	1.30041e-18	-0.167268	0.3	0.487	2.2713e-14	myeloidLin
CD302	1.75684e-18	-0.168498	0.188	0.348	3.0685e-14	myeloidLin
HMGB2	2.06362e-18	-0.408606	0.462	0.639	3.60431e-14	myeloidLin
GZMK	2.07755e-18	-0.270241	0.014	0.077	3.62865e-14	myeloidLin
GPI	2.24746e-18	-0.184427	0.226	0.389	3.92542e-14	myeloidLin
DNAJC5	2.63422e-18	-0.105283	0.075	0.193	4.60094e-14	myeloidLin
SIRPB1	2.74321e-18	-0.101647	0.058	0.166	4.79129e-14	myeloidLin
NUB1	2.88866e-18	-0.13274	0.112	0.248	5.04533e-14	myeloidLin
ATP6AP1	3.01747e-18	-0.131404	0.136	0.282	5.27032e-14	myeloidLin
WAS	3.54148e-18	-0.134621	0.153	0.307	6.18555e-14	myeloidLin
ATP5PD	3.59819e-18	-0.178424	0.267	0.439	6.2846e-14	myeloidLin
RAB20	3.71654e-18	-0.127561	0.115	0.252	6.49132e-14	myeloidLin
CALM2	3.75526e-18	-0.184203	0.775	0.898	6.55894e-14	myeloidLin
TUBB4B	4.41765e-18	-0.175605	0.055	0.157	7.71586e-14	myeloidLin
CALCOCO2	4.91512e-18	-0.154077	0.2	0.364	8.58475e-14	myeloidLin
RHOG	4.9489e-18	-0.171389	0.414	0.608	8.64374e-14	myeloidLin
PSMA7	6.67911e-18	-0.203884	0.452	0.623	1.16657e-13	myeloidLin
SHKBP1	7.24393e-18	-0.126143	0.099	0.228	1.26523e-13	myeloidLin
TSPO	8.8594e-18	-0.215625	0.57	0.73	1.54738e-13	myeloidLin
CLTB	9.78378e-18	-0.103242	0.065	0.175	1.70883e-13	myeloidLin
SAT1	9.94842e-18	-0.289911	0.937	0.908	1.73759e-13	myeloidLin
ATP5MPL	1.00585e-17	0.2324	0.767	0.679	1.75682e-13	myeloidLin
CBWD2	1.01722e-17	-0.108033	0.083	0.203	1.77667e-13	myeloidLin
ALOX15B	1.11491e-17	-0.105969	0.055	0.157	1.9473e-13	myeloidLin
CNIH4	1.21093e-17	-0.205865	0.341	0.513	2.11501e-13	myeloidLin
MGAT1	1.36055e-17	-0.184767	0.322	0.498	2.37634e-13	myeloidLin
CST3	1.38314e-17	-0.258787	0.849	0.87	2.41579e-13	myeloidLin
ATG3	1.94813e-17	-0.171392	0.332	0.508	3.40261e-13	myeloidLin
ZNF385A	2.24508e-17	-0.134621	0.152	0.3	3.92126e-13	myeloidLin
AIF1	2.47815e-17	-0.213021	0.868	0.905	4.32834e-13	myeloidLin
DEK	2.53898e-17	-0.214034	0.535	0.685	4.43458e-13	myeloidLin
PSMC3	2.70386e-17	-0.109756	0.069	0.179	4.72257e-13	myeloidLin
LRPAP1	2.70901e-17	-0.121467	0.11	0.243	4.73156e-13	myeloidLin
AREG	3.22652e-17	-0.190865	0.057	0.157	5.63544e-13	myeloidLin
MTFP1	3.24686e-17	-0.104251	0.067	0.175	5.67097e-13	myeloidLin
TIFA	3.75461e-17	-0.114167	0.088	0.208	6.55779e-13	myeloidLin
TUBB	3.78052e-17	-0.424038	0.257	0.42	6.60305e-13	myeloidLin
CRELD2	4.19983e-17	-0.106223	0.067	0.175	7.33543e-13	myeloidLin
THEMIS2	4.40104e-17	-0.147752	0.183	0.336	7.68685e-13	myeloidLin
C1orf56	4.54694e-17	0.30593	0.196	0.057	7.94169e-13	myeloidLin
MT2A	4.96367e-17	-0.514289	0.859	0.861	8.66955e-13	myeloidLin
CD300A	5.48043e-17	-0.129718	0.119	0.252	9.57211e-13	myeloidLin
TUBA1B	7.40266e-17	-0.31694	0.653	0.834	1.29295e-12	myeloidLin
NASP	7.48376e-17	-0.119868	0.087	0.205	1.30711e-12	myeloidLin
LAMP1	8.6911e-17	-0.141483	0.17	0.32	1.51799e-12	myeloidLin
OS9	9.77158e-17	-0.117612	0.115	0.246	1.7067e-12	myeloidLin
IFI16	1.49084e-16	-0.187329	0.431	0.607	2.60391e-12	myeloidLin
FCGR3A	1.79726e-16	-0.307823	0.369	0.525	3.13909e-12	myeloidLin
P4HA1	1.82998e-16	-0.161349	0.187	0.336	3.19625e-12	myeloidLin
ARPC2	1.87564e-16	0.207296	0.919	0.857	3.276e-12	myeloidLin
FAM13A	1.92083e-16	-0.12316	0.105	0.231	3.35492e-12	myeloidLin
HNRNPH1	1.9295e-16	0.482835	0.323	0.167	3.37006e-12	myeloidLin
GNB2	1.93514e-16	-0.138426	0.202	0.361	3.37991e-12	myeloidLin
TUBA1C	2.11882e-16	-0.121576	0.091	0.208	3.70074e-12	myeloidLin
EREG	2.47188e-16	-0.116023	0.049	0.143	4.31739e-12	myeloidLin
COMMD6	2.68843e-16	0.2112	0.664	0.505	4.69561e-12	myeloidLin
OGFR	2.75297e-16	-0.126176	0.157	0.302	4.80833e-12	myeloidLin
SYF2	2.97025e-16	-0.133855	0.238	0.407	5.18783e-12	myeloidLin
EFHD2	4.07386e-16	-0.158622	0.317	0.49	7.11541e-12	myeloidLin
WDR45B	4.15493e-16	-0.113215	0.091	0.208	7.25699e-12	myeloidLin
ATF4	4.2187e-16	-0.133547	0.173	0.321	7.36838e-12	myeloidLin
VAMP8	4.47854e-16	-0.186486	0.743	0.862	7.82222e-12	myeloidLin
XRN1	4.67134e-16	-0.137649	0.154	0.295	8.15895e-12	myeloidLin
ETV6	5.36576e-16	-0.123837	0.144	0.284	9.37183e-12	myeloidLin
CD300E	6.1153e-16	-0.138718	0.188	0.343	1.0681e-11	myeloidLin
FKBP8	6.1853e-16	-0.136708	0.275	0.449	1.08032e-11	myeloidLin
VEGFA	7.60182e-16	-0.108614	0.076	0.185	1.32773e-11	myeloidLin
CYBB	7.62032e-16	-0.19817	0.549	0.708	1.33096e-11	myeloidLin
LST1	8.73532e-16	0.243984	0.809	0.762	1.52571e-11	myeloidLin
ODF3B	1.32429e-15	-0.152073	0.224	0.377	2.313e-11	myeloidLin
DBNL	1.32889e-15	-0.12637	0.141	0.277	2.32103e-11	myeloidLin
NDUFA13	1.33503e-15	-0.154889	0.336	0.503	2.33176e-11	myeloidLin
CARS2	1.54394e-15	-0.128353	0.11	0.233	2.69665e-11	myeloidLin
IRAK3	1.91861e-15	-0.161813	0.235	0.387	3.35104e-11	myeloidLin
HILPDA	2.1091e-15	-0.165631	0.108	0.228	3.68375e-11	myeloidLin
PABPC4	2.45751e-15	-0.103508	0.073	0.177	4.29229e-11	myeloidLin
LPCAT2	2.47167e-15	-0.123349	0.154	0.292	4.31702e-11	myeloidLin
PTAFR	2.54053e-15	-0.112916	0.131	0.262	4.43729e-11	myeloidLin
ANKRD37	2.66119e-15	-0.136963	0.088	0.198	4.64803e-11	myeloidLin
FYB1	2.79701e-15	-0.175492	0.622	0.792	4.88525e-11	myeloidLin
NCOR1	2.99998e-15	-0.134056	0.117	0.239	5.23976e-11	myeloidLin
GAS7	3.03603e-15	-0.114113	0.104	0.223	5.30273e-11	myeloidLin
PLAUR	3.24076e-15	-0.129075	0.116	0.241	5.66032e-11	myeloidLin
CLEC4E	3.3192e-15	-0.125548	0.153	0.292	5.79731e-11	myeloidLin
RNASE2	3.48485e-15	-0.114515	0.048	0.136	6.08664e-11	myeloidLin
FPR2	4.19662e-15	-0.152334	0.218	0.369	7.32981e-11	myeloidLin
TCIRG1	4.6125e-15	-0.112961	0.122	0.248	8.0562e-11	myeloidLin
YBX3	4.81812e-15	-0.156056	0.179	0.318	8.41533e-11	myeloidLin
TLN1	5.04838e-15	-0.163931	0.332	0.493	8.81751e-11	myeloidLin
IFIT2	5.64697e-15	-0.200032	0.241	0.389	9.863e-11	myeloidLin
CYBC1	6.50264e-15	-0.123164	0.172	0.313	1.13575e-10	myeloidLin
SNX6	6.89023e-15	-0.154696	0.246	0.4	1.20345e-10	myeloidLin
UBA52	7.03837e-15	0.159158	0.985	0.979	1.22932e-10	myeloidLin
PCNA	7.23308e-15	-0.132833	0.039	0.12	1.26333e-10	myeloidLin
GBP4	8.6882e-15	-0.164476	0.233	0.377	1.51748e-10	myeloidLin
TIMP2	1.02593e-14	-0.115433	0.142	0.274	1.7919e-10	myeloidLin
MIF-AS1	1.12103e-14	0.113509	0.132	0.023	1.958e-10	myeloidLin
UBE2L6	1.31531e-14	-0.179666	0.332	0.484	2.29731e-10	myeloidLin
DUSP3	1.32864e-14	-0.108898	0.128	0.256	2.3206e-10	myeloidLin
LYN	1.49941e-14	-0.148783	0.316	0.477	2.61887e-10	myeloidLin
MCL1	2.18611e-14	-0.172704	0.465	0.636	3.81826e-10	myeloidLin
MEF2A	2.45482e-14	-0.131203	0.183	0.323	4.28759e-10	myeloidLin
FBP1	2.64514e-14	-0.206337	0.278	0.428	4.62e-10	myeloidLin
STK17A	2.66004e-14	-0.12506	0.031	0.102	4.64603e-10	myeloidLin
BASP1	3.0172e-14	-0.131087	0.112	0.228	5.26985e-10	myeloidLin
UQCR11	3.09534e-14	0.196063	0.856	0.764	5.40633e-10	myeloidLin
C19orf24	3.37724e-14	-0.108406	0.081	0.184	5.89869e-10	myeloidLin
SULF2	3.42419e-14	-0.120859	0.127	0.252	5.98069e-10	myeloidLin
RSU1	3.52015e-14	-0.103202	0.104	0.22	6.1483e-10	myeloidLin
PDIA4	3.54109e-14	-0.14056	0.163	0.295	6.18486e-10	myeloidLin
SLC2A3	3.65953e-14	-0.341352	0.449	0.585	6.39174e-10	myeloidLin
FPR1	3.76746e-14	-0.163835	0.361	0.52	6.58025e-10	myeloidLin
DOCK8	3.80605e-14	-0.137136	0.27	0.428	6.64765e-10	myeloidLin
AGTPBP1	3.99111e-14	-0.107096	0.089	0.197	6.97087e-10	myeloidLin
H2AFJ	5.44385e-14	-0.129695	0.176	0.311	9.50824e-10	myeloidLin
PRNP	5.56417e-14	-0.131404	0.136	0.259	9.71837e-10	myeloidLin
WARS	5.82135e-14	-0.271921	0.501	0.618	1.01676e-09	myeloidLin
PCMT1	6.42353e-14	-0.117576	0.121	0.239	1.12193e-09	myeloidLin
STAT3	7.73344e-14	-0.148596	0.219	0.361	1.35072e-09	myeloidLin
SCPEP1	8.01088e-14	-0.104041	0.114	0.231	1.39918e-09	myeloidLin
CDC42SE1	9.35004e-14	0.262166	0.268	0.133	1.63308e-09	myeloidLin
DAZAP2	9.39587e-14	-0.155534	0.486	0.646	1.64108e-09	myeloidLin
SRSF4	9.62954e-14	-0.108565	0.144	0.272	1.68189e-09	myeloidLin
IDH3G	1.11482e-13	-0.108455	0.099	0.208	1.94715e-09	myeloidLin
WDR26	1.35868e-13	-0.112343	0.15	0.279	2.37307e-09	myeloidLin
SYNGR2	1.46098e-13	-0.119525	0.166	0.298	2.55175e-09	myeloidLin
CBX3	1.52761e-13	-0.145226	0.334	0.487	2.66812e-09	myeloidLin
ARF5	1.55243e-13	-0.131949	0.184	0.318	2.71148e-09	myeloidLin
JAK2	1.56666e-13	-0.10592	0.124	0.244	2.73632e-09	myeloidLin
PDIA6	1.72933e-13	-0.133448	0.272	0.425	3.02045e-09	myeloidLin
IRF8	1.85373e-13	-0.100445	0.1	0.21	3.23773e-09	myeloidLin
PLEK	1.85907e-13	-0.117353	0.203	0.346	3.24705e-09	myeloidLin
ADM	2.04708e-13	-0.183516	0.226	0.367	3.57542e-09	myeloidLin
AQP9	2.51252e-13	-0.132003	0.234	0.38	4.38837e-09	myeloidLin
CHMP4B	2.59538e-13	-0.117823	0.185	0.321	4.5331e-09	myeloidLin
TUBA1A	2.63266e-13	-0.163863	0.273	0.428	4.59821e-09	myeloidLin
SLC11A1	2.83524e-13	-0.194537	0.356	0.5	4.95204e-09	myeloidLin
TMEM51	2.86567e-13	-0.102521	0.097	0.203	5.00518e-09	myeloidLin
LCK	2.89974e-13	-0.128121	0.032	0.1	5.06469e-09	myeloidLin
CASP4	3.05959e-13	-0.139662	0.331	0.49	5.34387e-09	myeloidLin
ATP5MG	3.10895e-13	0.190642	0.82	0.723	5.43009e-09	myeloidLin
MYO1G	3.39118e-13	-0.117542	0.176	0.31	5.92303e-09	myeloidLin
LAPTM4A	3.75121e-13	-0.141928	0.241	0.38	6.55186e-09	myeloidLin
CORO1C	4.03705e-13	-0.107433	0.136	0.257	7.05112e-09	myeloidLin
TMEM59	4.14417e-13	-0.1281	0.254	0.403	7.2382e-09	myeloidLin
FRG1	4.32023e-13	-0.113182	0.103	0.21	7.54572e-09	myeloidLin
TMCO1	4.43925e-13	-0.11127	0.155	0.282	7.7536e-09	myeloidLin
SLC7A7	5.74228e-13	-0.120927	0.185	0.316	1.00295e-08	myeloidLin
ASAH1	8.22555e-13	-0.130778	0.283	0.434	1.43668e-08	myeloidLin
ST8SIA4	1.03064e-12	-0.125821	0.198	0.331	1.80012e-08	myeloidLin
GSTO1	1.15217e-12	-0.136958	0.343	0.502	2.01239e-08	myeloidLin
AC092069.1	1.16972e-12	0.152097	0.091	0.007	2.04303e-08	myeloidLin
NDFIP1	1.20823e-12	-0.112524	0.157	0.28	2.11029e-08	myeloidLin
LRRC25	1.23705e-12	-0.121756	0.183	0.313	2.16064e-08	myeloidLin
PYURF	1.2752e-12	0.153827	0.312	0.172	2.22726e-08	myeloidLin
IQGAP1	1.3245e-12	-0.146259	0.379	0.528	2.31337e-08	myeloidLin
KRTCAP2	1.34468e-12	-0.125437	0.226	0.366	2.34861e-08	myeloidLin
TFEC	1.36362e-12	-0.110915	0.135	0.251	2.38169e-08	myeloidLin
RTN4	1.42394e-12	-0.132267	0.411	0.567	2.48706e-08	myeloidLin
TLR2	1.50412e-12	-0.160603	0.324	0.467	2.62709e-08	myeloidLin
S100A9	1.55901e-12	-0.419406	0.913	0.893	2.72297e-08	myeloidLin
AP2M1	1.58945e-12	-0.106802	0.156	0.28	2.77614e-08	myeloidLin
CYSTM1	1.64552e-12	-0.116536	0.139	0.256	2.87406e-08	myeloidLin
EIF2S2	1.69526e-12	-0.142959	0.297	0.443	2.96094e-08	myeloidLin
REEP5	2.10535e-12	-0.125088	0.208	0.343	3.67721e-08	myeloidLin
TKT	2.22972e-12	-0.11057	0.238	0.38	3.89443e-08	myeloidLin
PSMB1	2.67578e-12	-0.132694	0.242	0.379	4.67351e-08	myeloidLin
PLP2	2.92678e-12	-0.122782	0.166	0.289	5.11191e-08	myeloidLin
LARP1	2.97835e-12	-0.11776	0.164	0.287	5.20198e-08	myeloidLin
LMO4	3.08864e-12	-0.113831	0.131	0.244	5.39462e-08	myeloidLin
CANX	3.14549e-12	-0.149602	0.326	0.466	5.49391e-08	myeloidLin
CXCL16	3.27338e-12	-0.107594	0.17	0.298	5.71728e-08	myeloidLin
ZYX	3.35421e-12	-0.145978	0.314	0.454	5.85845e-08	myeloidLin
BCL2A1	3.48398e-12	-0.158805	0.355	0.507	6.08511e-08	myeloidLin
PPP4C	3.50267e-12	-0.11724	0.219	0.354	6.11776e-08	myeloidLin
LILRB3	3.56189e-12	-0.119379	0.241	0.382	6.22119e-08	myeloidLin
UBE2S	3.79661e-12	-0.120722	0.06	0.143	6.63116e-08	myeloidLin
PSMD8	3.85753e-12	-0.117214	0.143	0.259	6.73756e-08	myeloidLin
TOMM7	4.10406e-12	0.197425	0.731	0.628	7.16816e-08	myeloidLin
RGS18	4.38301e-12	-0.112001	0.143	0.259	7.65536e-08	myeloidLin
NMI	4.68464e-12	-0.115081	0.215	0.351	8.18219e-08	myeloidLin
ACSL4	5.18502e-12	-0.108027	0.137	0.251	9.05616e-08	myeloidLin
NUP58	5.43037e-12	-0.121364	0.143	0.256	9.48468e-08	myeloidLin
ACTG1	5.80509e-12	-0.26074	0.765	0.831	1.01392e-07	myeloidLin
KIAA1551	5.88292e-12	-0.106545	0.132	0.244	1.02751e-07	myeloidLin
SRSF5	5.95547e-12	-0.116837	0.244	0.385	1.04018e-07	myeloidLin
ATP6V0D1	7.11971e-12	-0.101966	0.151	0.27	1.24353e-07	myeloidLin
CSGALNACT2	7.73856e-12	-0.122652	0.19	0.316	1.35162e-07	myeloidLin
TGFB1	7.90822e-12	-0.115807	0.232	0.37	1.38125e-07	myeloidLin
EIF3J	8.40343e-12	-0.106216	0.142	0.257	1.46774e-07	myeloidLin
CD81	8.98467e-12	-0.1346	0.194	0.316	1.56926e-07	myeloidLin
MSRB1	8.99771e-12	-0.104893	0.165	0.287	1.57154e-07	myeloidLin
NACA	1.09447e-11	0.175574	0.879	0.785	1.9116e-07	myeloidLin
HNRNPK	1.12315e-11	-0.13139	0.388	0.543	1.9617e-07	myeloidLin
CLIC1	1.19218e-11	-0.16201	0.603	0.743	2.08226e-07	myeloidLin
GNAS	1.27218e-11	-0.109574	0.212	0.343	2.22199e-07	myeloidLin
PGD	1.28084e-11	-0.110391	0.198	0.326	2.23711e-07	myeloidLin
DCXR	1.31337e-11	-0.101279	0.109	0.211	2.29393e-07	myeloidLin
TNFRSF1A	1.3782e-11	-0.113638	0.198	0.325	2.40716e-07	myeloidLin
ANXA1	1.52455e-11	-0.151597	0.361	0.51	2.66278e-07	myeloidLin
ST13	1.53748e-11	-0.110214	0.188	0.315	2.68536e-07	myeloidLin
DNAJC8	1.54151e-11	-0.110189	0.143	0.256	2.69241e-07	myeloidLin
FGR	1.65011e-11	-0.121735	0.283	0.425	2.88208e-07	myeloidLin
ATP6V1B2	1.66993e-11	-0.124768	0.248	0.382	2.9167e-07	myeloidLin
CHMP2A	1.67779e-11	-0.123476	0.23	0.361	2.93043e-07	myeloidLin
PPP1CB	1.68702e-11	0.31753	0.449	0.338	2.94655e-07	myeloidLin
F13A1	2.02212e-11	0.125481	0.147	0.046	3.53184e-07	myeloidLin
ISG15	2.14304e-11	-0.264339	0.675	0.761	3.74304e-07	myeloidLin
ANXA5	2.19699e-11	-0.12228	0.313	0.459	3.83727e-07	myeloidLin
SHOC2	2.26349e-11	-0.120144	0.21	0.338	3.95341e-07	myeloidLin
CCNG2	2.7019e-11	-0.100445	0.095	0.19	4.71915e-07	myeloidLin
GLRX	2.94716e-11	-0.193689	0.488	0.6	5.14751e-07	myeloidLin
CAPNS1	3.06212e-11	-0.112838	0.247	0.385	5.3483e-07	myeloidLin
MGST3	3.11991e-11	-0.103414	0.138	0.248	5.44924e-07	myeloidLin
TXNIP	3.23656e-11	-0.194932	0.647	0.759	5.65297e-07	myeloidLin
HINT1	3.38812e-11	0.174874	0.506	0.361	5.91769e-07	myeloidLin
GNB1	3.75431e-11	-0.11953	0.255	0.39	6.55729e-07	myeloidLin
EIF4H	4.87427e-11	-0.103815	0.146	0.257	8.5134e-07	myeloidLin
SERPINB1	5.5115e-11	-0.123185	0.383	0.53	9.62638e-07	myeloidLin
HSPA6	6.07128e-11	-0.100273	0.147	0.259	1.06041e-06	myeloidLin
MFSD1	6.34564e-11	-0.113105	0.208	0.331	1.10833e-06	myeloidLin
EMP3	6.46071e-11	-0.121974	0.492	0.646	1.12843e-06	myeloidLin
NAMPT	6.53097e-11	-0.288365	0.519	0.643	1.1407e-06	myeloidLin
IFNGR1	7.12288e-11	-0.138694	0.309	0.443	1.24408e-06	myeloidLin
ATP6V0B	9.37627e-11	-0.131477	0.343	0.48	1.63766e-06	myeloidLin
CAST	9.56596e-11	-0.114609	0.31	0.451	1.67079e-06	myeloidLin
MTRNR2L1	1.09117e-10	0.105188	0.174	0.069	1.90584e-06	myeloidLin
RNH1	1.1553e-10	-0.109708	0.197	0.318	2.01784e-06	myeloidLin
CORO1A	1.19343e-10	-0.326639	0.392	0.508	2.08445e-06	myeloidLin
CHMP3	1.26998e-10	-0.103374	0.159	0.27	2.21815e-06	myeloidLin
UPP1	1.50871e-10	-0.162332	0.383	0.515	2.63511e-06	myeloidLin
APOBEC3G	1.56707e-10	-0.127126	0.062	0.138	2.73705e-06	myeloidLin
DDX24	1.96192e-10	-0.112327	0.159	0.269	3.42669e-06	myeloidLin
LGALS1	2.48045e-10	-0.195972	0.908	0.908	4.33236e-06	myeloidLin
KLRB1	2.65295e-10	0.150353	0.122	0.034	4.63365e-06	myeloidLin
JUND	2.66227e-10	-0.133212	0.259	0.382	4.64992e-06	myeloidLin
POLR2L	2.82517e-10	0.179481	0.512	0.384	4.93443e-06	myeloidLin
ARHGDIA	3.01594e-10	-0.10899	0.273	0.405	5.26764e-06	myeloidLin
KPNA2	3.27284e-10	-0.121844	0.045	0.111	5.71634e-06	myeloidLin
LTA4H	3.76635e-10	-0.143377	0.181	0.289	6.57831e-06	myeloidLin
GSTP1	3.77121e-10	-0.142293	0.37	0.498	6.58679e-06	myeloidLin
TMED5	3.96163e-10	-0.102925	0.167	0.277	6.91938e-06	myeloidLin
C4orf3	4.19854e-10	0.176526	0.899	0.833	7.33316e-06	myeloidLin
XRCC5	4.22105e-10	-0.101844	0.162	0.272	7.37248e-06	myeloidLin
HLA-DRB5	4.68149e-10	0.12751	0.079	0.01	8.17669e-06	myeloidLin
AGFG1	5.20309e-10	-0.117868	0.242	0.364	9.08772e-06	myeloidLin
XAF1	5.27677e-10	-0.108185	0.254	0.382	9.21641e-06	myeloidLin
SDCBP	6.33565e-10	-0.114415	0.446	0.595	1.10659e-05	myeloidLin
GK	6.36375e-10	-0.126208	0.26	0.385	1.11149e-05	myeloidLin
PRELID1	7.11449e-10	0.213108	0.661	0.62	1.24262e-05	myeloidLin
CHMP5	7.55406e-10	-0.100206	0.179	0.292	1.31939e-05	myeloidLin
GNLY	7.827e-10	0.119869	0.078	0.01	1.36706e-05	myeloidLin
LMAN2	8.58604e-10	-0.100075	0.175	0.285	1.49964e-05	myeloidLin
PRDX5	1.00275e-09	-0.124249	0.296	0.423	1.75141e-05	myeloidLin
DDX5	1.30258e-09	-0.130305	0.461	0.598	2.27508e-05	myeloidLin
EPSTI1	1.44845e-09	-0.171459	0.47	0.564	2.52986e-05	myeloidLin
IFI35	1.50569e-09	-0.114123	0.203	0.316	2.62983e-05	myeloidLin
SH3GLB1	1.53198e-09	-0.122722	0.281	0.4	2.67576e-05	myeloidLin
TIMP1	1.66686e-09	-0.224918	0.742	0.802	2.91134e-05	myeloidLin
CD48	1.66809e-09	-0.113013	0.229	0.346	2.91349e-05	myeloidLin
FOSL2	1.80863e-09	-0.101348	0.156	0.261	3.15895e-05	myeloidLin
KLF6	1.84574e-09	-0.163167	0.481	0.605	3.22377e-05	myeloidLin
FAM162A	1.96353e-09	-0.178893	0.253	0.362	3.4295e-05	myeloidLin
HMGN2	2.02623e-09	-0.23077	0.447	0.574	3.53902e-05	myeloidLin
PPP1CA	2.03183e-09	-0.134381	0.271	0.385	3.5488e-05	myeloidLin
FLOT1	2.14688e-09	-0.106777	0.199	0.31	3.74974e-05	myeloidLin
KTN1	2.34677e-09	-0.115901	0.223	0.336	4.09886e-05	myeloidLin
EEF1D	2.37454e-09	0.145207	0.852	0.777	4.14736e-05	myeloidLin
SCAND1	2.78854e-09	-0.107828	0.258	0.377	4.87047e-05	myeloidLin
LY6E	3.07818e-09	-0.146894	0.68	0.77	5.37636e-05	myeloidLin
ATP1B3	3.52738e-09	-0.105896	0.252	0.37	6.16092e-05	myeloidLin
PSMB8	3.80601e-09	-0.105046	0.34	0.472	6.64758e-05	myeloidLin
IL17RA	4.04047e-09	-0.102521	0.22	0.334	7.05709e-05	myeloidLin
BLOC1S1	4.165e-09	-0.119647	0.57	0.697	7.27459e-05	myeloidLin
MPEG1	4.20826e-09	-0.142684	0.284	0.395	7.35014e-05	myeloidLin
LTB	5.1273e-09	0.12901	0.148	0.059	8.95535e-05	myeloidLin
WDR1	5.69123e-09	-0.102952	0.197	0.303	9.94031e-05	myeloidLin
BNIP3L	6.4642e-09	-0.188116	0.548	0.656	0.000112904	myeloidLin
CCNL1	6.94464e-09	-0.112056	0.231	0.343	0.000121295	myeloidLin
PTTG1IP	7.51602e-09	-0.102953	0.243	0.359	0.000131275	myeloidLin
HNRNPDL	7.61254e-09	-0.109923	0.391	0.53	0.000132961	myeloidLin
TPM3	7.7702e-09	-0.128258	0.611	0.726	0.000135714	myeloidLin
IFI27	8.30697e-09	-0.229972	0.077	0.151	0.000145089	myeloidLin
EIF3E	8.47134e-09	0.138014	0.403	0.285	0.000147961	myeloidLin
CD8A	8.82322e-09	-0.124209	0.027	0.075	0.000154106	myeloidLin
GNAQ	8.87487e-09	0.141293	0.362	0.251	0.000155008	myeloidLin
TYMS	1.29785e-08	-0.142859	0.031	0.082	0.000226682	myeloidLin
CSF3R	1.42536e-08	-0.120591	0.378	0.497	0.000248953	myeloidLin
NOP10	1.63181e-08	0.173901	0.602	0.53	0.000285012	myeloidLin
MT1X	1.74716e-08	-0.597676	0.269	0.366	0.000305159	myeloidLin
RGS10	1.83391e-08	-0.104181	0.402	0.533	0.000320311	myeloidLin
ANP32B	2.08494e-08	-0.132625	0.274	0.389	0.000364155	myeloidLin
SMC4	2.37911e-08	-0.123628	0.064	0.13	0.000415536	myeloidLin
TMEM167A	2.50004e-08	0.191673	0.579	0.498	0.000436657	myeloidLin
ACSL1	2.6189e-08	-0.122481	0.299	0.415	0.000457417	myeloidLin
HLA-DPA1	2.91952e-08	-0.181229	0.707	0.833	0.000509923	myeloidLin
IRF1	2.94215e-08	-0.138235	0.414	0.526	0.000513877	myeloidLin
TPP1	3.40444e-08	-0.110576	0.291	0.402	0.00059462	myeloidLin
IRF7	3.52965e-08	-0.121831	0.267	0.374	0.000616489	myeloidLin
ARL6IP1	4.15949e-08	-0.118208	0.191	0.289	0.000726497	myeloidLin
GHITM	4.75669e-08	-0.100308	0.188	0.287	0.000830804	myeloidLin
VAMP5	4.79798e-08	-0.168205	0.853	0.836	0.000838015	myeloidLin
TAGLN2	5.47169e-08	-0.100815	0.232	0.339	0.000955685	myeloidLin
DDX21	6.67097e-08	-0.120545	0.293	0.398	0.00116515	myeloidLin
GIMAP7	7.38924e-08	-0.158973	0.216	0.31	0.00129061	myeloidLin
GCA	7.57761e-08	-0.108344	0.434	0.551	0.0013235	myeloidLin
FKBP5	9.90402e-08	-0.116134	0.533	0.657	0.00172984	myeloidLin
IFIT3	1.13784e-07	-0.121674	0.33	0.443	0.00198736	myeloidLin
HNRNPA2B1	1.29547e-07	-0.109384	0.533	0.67	0.00226266	myeloidLin
UBE2R2	1.48913e-07	-0.10606	0.223	0.321	0.00260091	myeloidLin
SARAF	1.49691e-07	-0.102595	0.471	0.593	0.0026145	myeloidLin
DRAP1	1.67606e-07	-0.105213	0.432	0.552	0.0029274	myeloidLin
UQCRQ	1.72087e-07	0.166879	0.581	0.516	0.00300567	myeloidLin
WIPF1	2.07726e-07	-0.101166	0.238	0.339	0.00362815	myeloidLin
ATP5MC3	2.15674e-07	-0.114884	0.394	0.502	0.00376697	myeloidLin
PYCARD	2.33848e-07	-0.112542	0.497	0.61	0.00408439	myeloidLin
SEC61G	2.66665e-07	0.158624	0.806	0.743	0.00465757	myeloidLin
CTSC	2.72152e-07	-0.102684	0.293	0.398	0.00475341	myeloidLin
ERO1A	3.74883e-07	-0.109079	0.356	0.464	0.00654771	myeloidLin
SMAP2	5.55133e-07	-0.110363	0.462	0.577	0.00969595	myeloidLin
UBL5	7.37446e-07	0.141636	0.723	0.674	0.0128802	myeloidLin
HNRNPC	8.06507e-07	-0.100304	0.289	0.392	0.0140865	myeloidLin
TGFBI	8.34149e-07	-0.108004	0.242	0.336	0.0145693	myeloidLin
STAT1	1.11554e-06	-0.126262	0.586	0.659	0.0194841	myeloidLin
FGD2	1.20903e-06	0.200778	0.228	0.146	0.0211169	myeloidLin
ATF5	1.26928e-06	-0.178303	0.366	0.449	0.0221693	myeloidLin
RNASET2	1.45931e-06	-0.142844	0.444	0.536	0.0254883	myeloidLin
CCL3	2.50895e-06	-0.139151	0.015	0.046	0.0438214	myeloidLin
CSTA	2.66689e-06	-0.107839	0.523	0.625	0.0465798	myeloidLin
B2M	1.32498e-277	-0.733153	1	1	2.3142e-273	help
UBC	6.73471e-226	-0.660743	0.226	0.745	1.17628e-221	help
HLA-A	8.85653e-219	-0.851276	0.697	0.955	1.54688e-214	help
TRAC	2.16641e-205	-0.865379	0.406	0.847	3.78384e-201	help
HLA-C	2.05067e-181	-0.643729	0.797	0.968	3.58169e-177	help
IL32	4.86742e-174	-0.837078	0.547	0.88	8.50143e-170	help
CXCR4	2.34103e-169	-0.68463	0.322	0.757	4.08884e-165	help
LCK	7.75588e-151	-0.446851	0.193	0.606	1.35464e-146	help
UBB	2.23655e-148	-0.517678	0.255	0.679	3.90635e-144	help
HLA-B	1.00845e-146	-0.539192	0.897	0.982	1.76135e-142	help
LSP1	3.02761e-140	-0.405041	0.154	0.54	5.28802e-136	help
IL2RG	1.13082e-136	-0.389077	0.167	0.556	1.97509e-132	help
EEF2	4.85406e-133	-0.522198	0.632	0.909	8.47811e-129	help
CORO1A	3.63872e-126	-0.542634	0.56	0.852	6.35539e-122	help
DDX5	1.61808e-124	-0.487977	0.442	0.808	2.82615e-120	help
ARHGDIB	3.23707e-120	-0.486461	0.599	0.889	5.65387e-116	help
ECH1	1.04966e-113	-0.249907	0.063	0.331	1.83334e-109	help
SRSF5	2.0859e-111	-0.380231	0.24	0.617	3.64324e-107	help
RGS1	2.24602e-110	-0.331946	0.031	0.245	3.92289e-106	help
ANXA5	1.07895e-109	-0.267514	0.06	0.317	1.8845e-105	help
EEF1A1	2.93808e-108	-0.395543	1	1	5.13165e-104	help
HNRNPA2B1	2.11291e-103	-0.37546	0.251	0.614	3.69041e-99	help
MYO1G	4.98082e-102	-0.254132	0.074	0.337	8.6995e-98	help
EIF4A2	5.5779e-102	-0.361799	0.268	0.637	9.74237e-98	help
PSMB3	2.50095e-99	-0.257864	0.087	0.357	4.36817e-95	help
CD53	2.72549e-99	-0.334605	0.196	0.539	4.76034e-95	help
ENO1	3.67573e-99	-0.454676	0.348	0.679	6.42003e-95	help
CD52	1.208e-97	-0.534424	0.879	0.951	2.1099e-93	help
PRDX1	5.5003e-97	-0.291048	0.111	0.397	9.60682e-93	help
TRBC2	2.68642e-96	-0.526876	0.293	0.617	4.6921e-92	help
TMBIM6	3.11118e-94	-0.317756	0.17	0.49	5.43398e-90	help
ITGB7	4.80517e-94	-0.202188	0.04	0.246	8.39271e-90	help
HNRNPK	1.49706e-92	-0.329443	0.232	0.578	2.61476e-88	help
ANXA6	3.46894e-91	-0.219686	0.064	0.298	6.05885e-87	help
CD3D	3.91383e-91	-0.432976	0.485	0.801	6.83589e-87	help
MYL12B	6.16144e-91	-0.384085	0.346	0.702	1.07616e-86	help
PGK1	9.38974e-90	-0.315431	0.154	0.459	1.64001e-85	help
CD3E	2.21233e-89	-0.352187	0.28	0.618	3.86405e-85	help
XRCC6	2.46335e-89	-0.228916	0.082	0.332	4.30248e-85	help
HNRNPF	2.81899e-88	-0.297634	0.168	0.475	4.92366e-84	help
TRAF3IP3	1.50566e-87	-0.303256	0.185	0.498	2.62979e-83	help
TUBA4A	3.59974e-86	-0.271322	0.128	0.407	6.2873e-82	help
MDH1	4.89179e-86	-0.207122	0.06	0.282	8.54401e-82	help
JUN	1.14597e-85	-0.233164	0.042	0.239	2.00155e-81	help
S1PR4	2.6807e-85	-0.288253	0.167	0.469	4.6821e-81	help
BTG1	1.70165e-83	-0.450386	0.452	0.741	2.97211e-79	help
AP2M1	2.27452e-83	-0.229752	0.083	0.324	3.97268e-79	help
MTRNR2L8	3.74473e-83	-0.345628	0.298	0.636	6.54054e-79	help
HNRNPM	1.03325e-82	-0.243913	0.117	0.386	1.80468e-78	help
ANXA2	9.47907e-82	-0.337131	0.197	0.502	1.65561e-77	help
SEPT7	3.80928e-81	-0.304251	0.199	0.507	6.65329e-77	help
RAN	9.9937e-81	-0.317016	0.269	0.591	1.7455e-76	help
PPP1CA	2.516e-80	-0.280776	0.171	0.464	4.39444e-76	help
ACTB	5.40422e-80	-0.417205	0.937	0.989	9.43901e-76	help
CD69	1.47542e-79	-0.389605	0.224	0.526	2.57696e-75	help
FDFT1	1.70879e-79	-0.192252	0.056	0.263	2.98458e-75	help
MYL12A	1.62544e-78	-0.383582	0.682	0.878	2.839e-74	help
EVL	2.61943e-78	-0.32583	0.259	0.574	4.5751e-74	help
CFL1	3.47565e-78	-0.395818	0.661	0.885	6.07057e-74	help
JUNB	8.75216e-78	-0.352562	0.162	0.438	1.52865e-73	help
ARL6IP5	6.15626e-77	-0.31142	0.221	0.524	1.07525e-72	help
ITGB2	2.08446e-76	-0.224979	0.09	0.328	3.64071e-72	help
HSPA8	5.65616e-75	-0.413579	0.582	0.811	9.87904e-71	help
MGST3	7.22391e-75	-0.197011	0.072	0.289	1.26173e-70	help
CCT5	1.29486e-74	-0.189371	0.052	0.245	2.2616e-70	help
CD7	1.01016e-73	-0.343857	0.242	0.544	1.76434e-69	help
ANXA11	1.93845e-73	-0.229141	0.113	0.36	3.3857e-69	help
HNRNPC	6.44565e-71	-0.264716	0.197	0.485	1.1258e-66	help
PKM	1.95533e-70	-0.257125	0.136	0.393	3.41517e-66	help
AQP3	7.00763e-70	-0.265402	0.11	0.345	1.22395e-65	help
SPOCK2	7.31346e-70	-0.294563	0.235	0.53	1.27737e-65	help
PIM1	1.37444e-69	-0.309604	0.189	0.466	2.4006e-65	help
VIM	1.59215e-69	-0.393416	0.595	0.837	2.78086e-65	help
MALAT1	2.46779e-69	-0.373595	1	1	4.31025e-65	help
AC114760.2	2.82926e-69	-0.234754	0.146	0.411	4.94159e-65	help
BIN2	4.91479e-69	-0.25315	0.196	0.48	8.58418e-65	help
ITM2A	5.00117e-69	-0.232182	0.082	0.295	8.73505e-65	help
GIMAP7	3.59986e-68	-0.364515	0.348	0.648	6.28751e-64	help
PSMD8	7.53267e-68	-0.201786	0.097	0.324	1.31566e-63	help
S100A4	4.88868e-67	-0.502783	0.932	0.947	8.53856e-63	help
PFN1	1.82579e-66	-0.352827	0.854	0.951	3.18892e-62	help
MYC	3.33027e-66	-0.246791	0.103	0.326	5.81665e-62	help
GSTK1	1.0989e-65	-0.298638	0.302	0.595	1.91935e-61	help
PRDX2	1.36445e-65	-0.228216	0.139	0.386	2.38314e-61	help
EIF3L	1.30325e-64	-0.307787	0.299	0.582	2.27625e-60	help
DAD1	1.35497e-64	-0.245466	0.162	0.417	2.36659e-60	help
XRCC5	1.89505e-64	-0.209326	0.115	0.347	3.30989e-60	help
EIF3D	6.9022e-64	-0.271733	0.206	0.474	1.20554e-59	help
CD2	7.49346e-64	-0.395362	0.478	0.752	1.30881e-59	help
MYL6	8.12941e-64	-0.344861	0.706	0.882	1.41988e-59	help
PSMA4	1.96134e-63	-0.215636	0.127	0.364	3.42567e-59	help
UCP2	3.26847e-63	-0.268124	0.185	0.448	5.70872e-59	help
ATP5F1B	4.27857e-63	-0.219313	0.121	0.353	7.47294e-59	help
HSPA5	7.41801e-63	-0.171919	0.065	0.256	1.29563e-58	help
PUF60	7.62629e-63	-0.142374	0.035	0.187	1.33201e-58	help
TMEM59	1.24024e-62	-0.243174	0.181	0.443	2.16621e-58	help
TKT	4.0509e-62	-0.192017	0.091	0.3	7.07531e-58	help
AES	4.06936e-61	-0.260557	0.239	0.517	7.10755e-57	help
COPE	4.57998e-61	-0.226199	0.152	0.399	7.99939e-57	help
SLC3A2	8.69021e-61	-0.147433	0.037	0.189	1.51783e-56	help
MAGED2	2.31125e-60	-0.11862	0.018	0.138	4.03682e-56	help
CD247	1.08771e-59	-0.213802	0.122	0.346	1.89979e-55	help
CAPZB	4.37988e-59	-0.260439	0.226	0.492	7.64991e-55	help
MYO1F	5.26096e-59	-0.234376	0.178	0.429	9.1888e-55	help
STK17A	7.79002e-59	-0.224806	0.107	0.318	1.3606e-54	help
CAPG	7.81062e-59	-0.157451	0.03	0.168	1.3642e-54	help
GHITM	1.02051e-58	-0.195814	0.115	0.334	1.78242e-54	help
ARF1	1.60251e-58	-0.198568	0.122	0.349	2.79894e-54	help
PEPD	2.05734e-58	-0.119808	0.023	0.151	3.59335e-54	help
CCT7	3.25794e-58	-0.166336	0.064	0.243	5.69032e-54	help
PTPN6	4.29902e-58	-0.128946	0.031	0.171	7.50867e-54	help
G3BP2	4.86217e-58	-0.191173	0.106	0.32	8.49227e-54	help
ACTR3	5.94547e-58	-0.241405	0.187	0.441	1.03844e-53	help
TNFRSF4	8.69127e-58	-0.282594	0.123	0.34	1.51802e-53	help
TERF2IP	1.2961e-57	-0.194465	0.12	0.341	2.26376e-53	help
HDAC1	1.53821e-57	-0.154183	0.041	0.194	2.68663e-53	help
IK	7.19876e-57	-0.18493	0.095	0.297	1.25733e-52	help
DOK2	1.25021e-56	-0.199834	0.113	0.325	2.18361e-52	help
RNH1	1.45074e-56	-0.165087	0.071	0.253	2.53386e-52	help
SOCS3	1.49164e-56	-0.176446	0.049	0.208	2.60529e-52	help
SRSF7	2.39562e-56	-0.240223	0.18	0.426	4.18419e-52	help
LAT	4.42372e-56	-0.228856	0.178	0.423	7.72647e-52	help
PSMA5	8.0484e-56	-0.181607	0.09	0.286	1.40573e-51	help
PARP1	9.27122e-56	-0.188792	0.098	0.3	1.61931e-51	help
LINC00513	1.23374e-55	-0.154852	0.07	0.252	2.15484e-51	help
EIF4A3	1.80866e-55	-0.112065	0.021	0.14	3.159e-51	help
FXYD5	2.48259e-55	-0.290943	0.498	0.786	4.3361e-51	help
ATP5F1A	2.57911e-55	-0.22249	0.191	0.44	4.50467e-51	help
SOD1	3.46083e-55	-0.258458	0.293	0.57	6.04468e-51	help
PSMB1	4.18646e-55	-0.237207	0.176	0.413	7.31206e-51	help
PSMC4	5.27932e-55	-0.134791	0.035	0.174	9.22087e-51	help
SKAP1	8.87567e-55	-0.19203	0.117	0.33	1.55022e-50	help
ANXA7	1.38657e-54	-0.156303	0.064	0.236	2.42179e-50	help
NBEAL1	1.5937e-54	0.440881	0.494	0.243	2.78356e-50	help
NOP53	1.60785e-54	-0.291594	0.538	0.816	2.80826e-50	help
SNRPN	1.69733e-54	-0.184175	0.101	0.3	2.96456e-50	help
C1QBP	2.46032e-54	-0.202838	0.14	0.363	4.2972e-50	help
FUT7	2.79711e-54	-0.122155	0.016	0.123	4.88543e-50	help
RUVBL1	3.78366e-54	-0.113304	0.024	0.147	6.60855e-50	help
PSMC5	6.54253e-54	-0.189212	0.123	0.337	1.14272e-49	help
HSP90AB1	6.78881e-54	-0.275984	0.293	0.555	1.18573e-49	help
SHKBP1	7.70538e-54	-0.133676	0.041	0.187	1.34582e-49	help
PCMT1	7.72918e-54	-0.15112	0.055	0.216	1.34998e-49	help
PSMB10	2.12664e-53	-0.173758	0.073	0.251	3.71439e-49	help
TBC1D10C	2.13967e-53	-0.219869	0.159	0.387	3.73715e-49	help
TRAPPC4	2.90931e-53	-0.140796	0.046	0.197	5.0814e-49	help
ADH5	3.02037e-53	-0.140982	0.043	0.191	5.27538e-49	help
RNASET2	3.72572e-53	-0.225294	0.176	0.414	6.50734e-49	help
DNAJC8	1.1665e-52	-0.189905	0.106	0.306	2.03741e-48	help
GPR183	1.72116e-52	-0.236834	0.152	0.375	3.00618e-48	help
LDHB	3.59729e-52	-0.305277	0.528	0.793	6.28303e-48	help
SDHC	6.50901e-52	-0.16184	0.081	0.263	1.13686e-47	help
CASP1	6.92249e-52	-0.15889	0.06	0.223	1.20908e-47	help
EAPP	9.34351e-52	-0.171159	0.087	0.271	1.63194e-47	help
ICAM2	9.6694e-52	-0.164831	0.062	0.224	1.68886e-47	help
ACTG1	1.21586e-51	-0.324346	0.723	0.889	2.12363e-47	help
CYBA	1.62568e-51	-0.313486	0.599	0.79	2.83942e-47	help
ANXA1	4.98036e-51	-0.291257	0.191	0.422	8.6987e-47	help
HSP90AA1	6.95493e-51	-0.249395	0.354	0.649	1.21475e-46	help
SKP1	1.94717e-50	-0.238256	0.306	0.574	3.40093e-46	help
PDCL3	3.78447e-50	-0.125725	0.038	0.174	6.60995e-46	help
APBB1IP	5.80027e-50	-0.15886	0.073	0.244	1.01308e-45	help
SELL	5.94787e-50	-0.230929	0.099	0.285	1.03885e-45	help
SSB	1.04418e-49	-0.167668	0.127	0.338	1.82377e-45	help
CALM2	1.48734e-49	-0.267756	0.345	0.592	2.59778e-45	help
CIB1	1.54468e-49	-0.23501	0.242	0.489	2.69793e-45	help
PSME2	1.69925e-49	-0.217345	0.229	0.482	2.96792e-45	help
ARHGAP15	1.80995e-49	-0.182304	0.132	0.341	3.16125e-45	help
ATP6AP2	2.06269e-49	-0.152813	0.061	0.218	3.60269e-45	help
ILF2	2.43255e-49	-0.155019	0.073	0.243	4.24869e-45	help
NSMCE1	4.04783e-49	-0.155563	0.065	0.228	7.06994e-45	help
EIF6	6.75853e-49	-0.147447	0.062	0.221	1.18044e-44	help
CDC123	7.09057e-49	-0.129774	0.041	0.179	1.23844e-44	help
ATP5F1E	8.23324e-49	0.302415	0.981	0.936	1.43802e-44	help
RAC2	9.62017e-49	-0.241965	0.288	0.547	1.68026e-44	help
RAB7A	1.50677e-48	-0.15342	0.074	0.243	2.63173e-44	help
CCT4	1.82487e-48	-0.164644	0.112	0.308	3.18731e-44	help
COPZ1	1.85724e-48	-0.135471	0.046	0.189	3.24386e-44	help
C14orf119	4.6869e-48	-0.137355	0.047	0.19	8.18614e-44	help
HNRNPA0	7.20453e-48	-0.175798	0.151	0.371	1.25834e-43	help
PABPC1	1.64059e-47	-0.286672	0.692	0.847	2.86545e-43	help
RAB5C	2.51852e-47	-0.135585	0.063	0.221	4.39884e-43	help
CTLA4	3.13416e-47	-0.10703	0.017	0.116	5.47412e-43	help
CXCR3	3.6651e-47	-0.149906	0.048	0.189	6.40147e-43	help
TSPO	3.74557e-47	-0.204243	0.208	0.446	6.54201e-43	help
ADRM1	3.79939e-47	-0.148521	0.069	0.231	6.63601e-43	help
NCOR1	7.06314e-47	-0.183634	0.137	0.344	1.23365e-42	help
ZFP36	1.07391e-46	-0.189874	0.096	0.275	1.8757e-42	help
SYTL1	1.22708e-46	-0.151322	0.066	0.223	2.14321e-42	help
RGS14	1.38297e-46	-0.122748	0.041	0.174	2.41549e-42	help
OSM	2.75175e-46	-0.179846	0.041	0.171	4.80621e-42	help
ICAM3	3.72943e-46	-0.21291	0.224	0.459	6.51383e-42	help
NDUFS2	4.41829e-46	-0.121605	0.038	0.166	7.71699e-42	help
MVP	4.80615e-46	-0.129249	0.051	0.194	8.39441e-42	help
HBB	6.03217e-46	-0.278541	0.002	0.064	1.05358e-41	help
TRAPPC6A	7.95865e-46	-0.167267	0.089	0.262	1.39006e-41	help
DPM1	9.01864e-46	-0.126821	0.046	0.184	1.5752e-41	help
SEPT1	1.53851e-45	-0.182815	0.132	0.33	2.68717e-41	help
CALM1	1.88196e-45	-0.272176	0.597	0.813	3.28704e-41	help
REXO2	2.11145e-45	-0.1691	0.13	0.33	3.68787e-41	help
MTRNR2L10	2.71732e-45	-0.193692	0.147	0.352	4.74608e-41	help
VDAC3	2.876e-45	-0.143554	0.066	0.222	5.02322e-41	help
ITM2B	3.28551e-45	-0.247057	0.407	0.648	5.73847e-41	help
DNAJA1	3.77787e-45	-0.152766	0.085	0.255	6.59843e-41	help
ARHGDIA	4.20781e-45	-0.167759	0.123	0.317	7.34936e-41	help
TUBB4B	4.25801e-45	-0.124752	0.038	0.166	7.43705e-41	help
HCLS1	4.71917e-45	-0.165474	0.13	0.331	8.2425e-41	help
FDPS	5.79823e-45	-0.139407	0.061	0.211	1.01272e-40	help
TTC1	7.02703e-45	-0.124352	0.048	0.186	1.22734e-40	help
CNBP	1.01871e-44	-0.197892	0.214	0.446	1.77928e-40	help
SDHA	1.37088e-44	-0.114009	0.035	0.156	2.39437e-40	help
TUBA1A	1.49758e-44	-0.151243	0.067	0.222	2.61567e-40	help
EIF3I	1.71924e-44	-0.185731	0.131	0.325	3.00283e-40	help
BUB3	1.72836e-44	-0.176728	0.134	0.332	3.01875e-40	help
M6PR	2.13873e-44	-0.154982	0.088	0.259	3.7355e-40	help
RHOH	3.22058e-44	-0.186432	0.18	0.4	5.62507e-40	help
HMOX2	3.63879e-44	-0.156293	0.078	0.239	6.35551e-40	help
PLP2	4.03925e-44	-0.218193	0.23	0.463	7.05495e-40	help
CTSH	4.2232e-44	-0.18278	0.102	0.278	7.37623e-40	help
CD48	4.71169e-44	-0.233591	0.347	0.598	8.22943e-40	help
TRADD	4.98032e-44	-0.171276	0.133	0.331	8.69863e-40	help
CISH	5.13783e-44	-0.191294	0.103	0.279	8.97374e-40	help
VPS28	6.06089e-44	-0.170842	0.118	0.306	1.05859e-39	help
AHSA1	6.2451e-44	-0.114456	0.036	0.159	1.09077e-39	help
POLR2G	8.67392e-44	-0.147913	0.069	0.222	1.51499e-39	help
TRBC1	1.29155e-43	-0.495514	0.283	0.489	2.25582e-39	help
PSMB6	2.44418e-43	-0.169223	0.103	0.279	4.269e-39	help
CLIC3	4.38779e-43	-0.148906	0.029	0.14	7.66371e-39	help
XIST	4.79943e-43	-0.216028	0.196	0.416	8.38269e-39	help
CTSC	5.5671e-43	-0.227657	0.171	0.377	9.7235e-39	help
TSC22D4	5.58607e-43	-0.158825	0.086	0.251	9.75662e-39	help
PRMT1	6.51045e-43	-0.120141	0.039	0.162	1.13712e-38	help
CXCR6	6.8278e-43	-0.160392	0.04	0.164	1.19254e-38	help
C1orf56	7.32051e-43	1.00003	0.405	0.178	1.2786e-38	help
CD59	9.97175e-43	-0.126926	0.048	0.183	1.74167e-38	help
TSC22D3	1.22392e-42	-0.247285	0.263	0.51	2.1377e-38	help
CAP1	1.30486e-42	-0.190517	0.191	0.41	2.27907e-38	help
IL16	1.42655e-42	-0.131924	0.061	0.207	2.4916e-38	help
PSMD4	1.69353e-42	-0.158182	0.097	0.268	2.95791e-38	help
PPP1R12A	3.28406e-42	-0.152135	0.089	0.256	5.73593e-38	help
SNRPB	3.64883e-42	-0.189667	0.171	0.379	6.37304e-38	help
ATP5F1D	4.22311e-42	-0.188828	0.117	0.297	7.37608e-38	help
PSMD2	4.45866e-42	-0.110522	0.041	0.167	7.7875e-38	help
PLIN2	4.95259e-42	-0.110291	0.036	0.154	8.6502e-38	help
PDIA3	6.02731e-42	-0.167688	0.114	0.295	1.05273e-37	help
SIT1	6.27756e-42	-0.188037	0.134	0.322	1.09644e-37	help
NUDC	7.25277e-42	-0.129797	0.074	0.23	1.26677e-37	help
EIF3F	9.64537e-42	-0.237499	0.391	0.634	1.68466e-37	help
SNX17	1.27697e-41	-0.135433	0.055	0.192	2.23036e-37	help
CHMP2A	1.34581e-41	-0.161204	0.102	0.275	2.3506e-37	help
EVI2A	1.52917e-41	-0.168	0.115	0.295	2.67085e-37	help
C12orf75	1.76961e-41	-0.191075	0.145	0.338	3.0908e-37	help
CYTIP	2.10372e-41	-0.192005	0.205	0.425	3.67435e-37	help
TGFB1	2.14597e-41	-0.164732	0.116	0.297	3.74814e-37	help
CDC25B	2.30599e-41	-0.132146	0.052	0.186	4.02764e-37	help
PHB	2.5781e-41	-0.143803	0.074	0.226	4.50292e-37	help
KARS	2.66226e-41	-0.146159	0.103	0.277	4.6499e-37	help
BSG	2.67425e-41	-0.154307	0.096	0.264	4.67084e-37	help
RAB11A	3.41496e-41	-0.13984	0.077	0.233	5.96457e-37	help
OSTF1	5.39721e-41	-0.17562	0.151	0.348	9.42676e-37	help
SNRNP40	5.4913e-41	-0.117155	0.041	0.163	9.5911e-37	help
TMEM50A	7.30065e-41	-0.186935	0.172	0.376	1.27513e-36	help
BCAP31	7.31313e-41	-0.142625	0.078	0.232	1.27731e-36	help
PSMD13	7.65653e-41	-0.126438	0.052	0.185	1.33729e-36	help
MDH2	8.41988e-41	-0.165	0.119	0.299	1.47062e-36	help
NDFIP1	8.83228e-41	-0.160592	0.124	0.307	1.54265e-36	help
ATP5F1C	9.66598e-41	-0.170572	0.139	0.33	1.68826e-36	help
PSMA3	9.68057e-41	-0.145238	0.08	0.237	1.69081e-36	help
ARHGEF1	1.02594e-40	-0.15439	0.092	0.256	1.79191e-36	help
TUBB	1.04339e-40	-0.200599	0.186	0.394	1.82239e-36	help
DBNL	1.7593e-40	-0.140611	0.066	0.211	3.07279e-36	help
SRI	2.33403e-40	-0.169768	0.132	0.318	4.07662e-36	help
EZR	2.52859e-40	-0.151667	0.108	0.282	4.41643e-36	help
NCL	3.88654e-40	-0.217102	0.239	0.46	6.78824e-36	help
PPP1R7	7.07373e-40	-0.129472	0.056	0.191	1.2355e-35	help
VDAC2	8.75352e-40	-0.160005	0.119	0.297	1.52889e-35	help
TECR	8.98826e-40	-0.1635	0.105	0.275	1.56989e-35	help
LGALS3	1.50564e-39	-0.194833	0.114	0.285	2.62974e-35	help
SAP18	1.696e-39	-0.191992	0.225	0.444	2.96223e-35	help
LRPAP1	2.01591e-39	-0.112227	0.046	0.171	3.52099e-35	help
REEP5	2.78199e-39	-0.169048	0.137	0.321	4.85902e-35	help
DENND2D	2.94244e-39	-0.149313	0.083	0.237	5.13927e-35	help
PEBP1	2.9904e-39	-0.186516	0.206	0.415	5.22304e-35	help
TBCB	7.15356e-39	-0.156405	0.127	0.308	1.24944e-34	help
BTN3A2	1.01308e-38	-0.134001	0.072	0.218	1.76944e-34	help
CTSA	1.05237e-38	-0.121554	0.041	0.159	1.83806e-34	help
CYBC1	1.40619e-38	-0.143297	0.084	0.238	2.45604e-34	help
JPT1	1.43824e-38	-0.168747	0.149	0.339	2.51204e-34	help
CCNDBP1	1.83698e-38	-0.134007	0.097	0.262	3.20848e-34	help
GSDMD	2.05561e-38	-0.1324	0.071	0.215	3.59033e-34	help
CCT2	2.39995e-38	-0.129718	0.074	0.222	4.19176e-34	help
EMP3	2.63378e-38	-0.281351	0.473	0.677	4.60016e-34	help
UGP2	3.79316e-38	-0.199784	0.182	0.38	6.62514e-34	help
LAPTM4A	3.90351e-38	-0.1197	0.053	0.183	6.81788e-34	help
ERP29	4.29808e-38	-0.19748	0.272	0.495	7.50703e-34	help
JAK1	4.40538e-38	-0.182732	0.185	0.387	7.69444e-34	help
IDI1	4.65586e-38	-0.14797	0.088	0.244	8.13192e-34	help
ATP1B3	8.78324e-38	-0.121369	0.053	0.182	1.53408e-33	help
IL10RA	1.15253e-37	-0.163374	0.112	0.28	2.01301e-33	help
CACYBP	1.1929e-37	-0.1468	0.122	0.297	2.08353e-33	help
TALDO1	1.30548e-37	-0.140581	0.091	0.247	2.28016e-33	help
PPP2CA	1.39868e-37	-0.130139	0.059	0.192	2.44293e-33	help
CASP4	1.53157e-37	-0.173286	0.145	0.329	2.67503e-33	help
RSU1	2.062e-37	-0.10564	0.049	0.175	3.60149e-33	help
EIF3G	2.22135e-37	-0.185912	0.301	0.536	3.8798e-33	help
TSTA3	3.28852e-37	-0.120031	0.049	0.171	5.74373e-33	help
TAX1BP1	3.71623e-37	-0.169909	0.139	0.32	6.49076e-33	help
PDCD6	4.34543e-37	-0.148181	0.119	0.291	7.58972e-33	help
TUFM	4.38211e-37	-0.150164	0.133	0.311	7.65379e-33	help
HNRNPH2	5.78561e-37	-0.105312	0.034	0.14	1.01051e-32	help
DHRS7	6.25755e-37	-0.137671	0.093	0.249	1.09294e-32	help
AIP	6.41827e-37	-0.131534	0.077	0.222	1.12102e-32	help
EID1	6.74704e-37	-0.182623	0.216	0.424	1.17844e-32	help
UQCRC2	7.34264e-37	-0.153274	0.131	0.307	1.28247e-32	help
UQCR11	7.42091e-37	0.280683	0.725	0.541	1.29614e-32	help
NDUFB8	8.13304e-37	-0.184632	0.227	0.439	1.42052e-32	help
SNRPB2	1.13679e-36	-0.172169	0.173	0.366	1.98552e-32	help
TAP1	1.22457e-36	-0.143902	0.111	0.278	2.13883e-32	help
EIF4A1	1.30894e-36	-0.143783	0.101	0.261	2.2862e-32	help
SCP2	1.40443e-36	-0.142184	0.108	0.272	2.45298e-32	help
PTPRC	1.46876e-36	-0.233226	0.459	0.69	2.56534e-32	help
CHMP7	1.82536e-36	-0.105071	0.036	0.144	3.18818e-32	help
HSPD1	2.43235e-36	-0.154847	0.112	0.277	4.24834e-32	help
CCT3	3.2652e-36	-0.16479	0.135	0.309	5.70299e-32	help
PBXIP1	3.8692e-36	-0.147589	0.107	0.269	6.75794e-32	help
CD58	4.05686e-36	-0.114439	0.044	0.161	7.08572e-32	help
HNRNPDL	5.37732e-36	-0.179649	0.25	0.469	9.39202e-32	help
PRDX5	5.99434e-36	-0.155569	0.121	0.291	1.04697e-31	help
EIF3H	6.84197e-36	-0.220594	0.389	0.614	1.19502e-31	help
TRAT1	1.40142e-35	-0.190952	0.179	0.368	2.44771e-31	help
VCP	1.76508e-35	-0.108803	0.054	0.179	3.08288e-31	help
ACAP1	1.83812e-35	-0.186367	0.27	0.489	3.21047e-31	help
PSMB2	1.95657e-35	-0.139281	0.082	0.226	3.41734e-31	help
TRABD	2.0522e-35	-0.145664	0.107	0.267	3.58438e-31	help
SEPT6	2.59182e-35	-0.183358	0.19	0.382	4.52687e-31	help
SELENOF	3.18716e-35	-0.163271	0.159	0.343	5.56669e-31	help
ATP1A1	3.77599e-35	-0.131239	0.084	0.231	6.59514e-31	help
HERPUD1	4.8484e-35	-0.167594	0.146	0.323	8.46822e-31	help
NAP1L4	5.56797e-35	-0.155548	0.117	0.28	9.72501e-31	help
KLF6	6.24173e-35	-0.209333	0.25	0.462	1.09018e-30	help
PPP4C	7.1646e-35	-0.140494	0.099	0.254	1.25137e-30	help
CLEC2D	7.6679e-35	-0.191739	0.297	0.52	1.33928e-30	help
DDOST	8.84171e-35	-0.122909	0.066	0.198	1.54429e-30	help
BCAS2	9.19157e-35	-0.118708	0.058	0.184	1.6054e-30	help
ZAP70	9.49603e-35	-0.120286	0.064	0.194	1.65858e-30	help
PSMD7	1.14694e-34	-0.12328	0.07	0.205	2.00324e-30	help
SNW1	1.30962e-34	-0.115772	0.061	0.19	2.28738e-30	help
PPP1R18	1.44455e-34	-0.176526	0.157	0.337	2.52306e-30	help
MAGOH	1.53836e-34	-0.129836	0.074	0.211	2.6869e-30	help
HNRNPH3	1.65369e-34	-0.121768	0.062	0.19	2.88833e-30	help
CAPN1	1.72149e-34	-0.105837	0.04	0.149	3.00675e-30	help
YTHDF2	2.31311e-34	-0.119691	0.073	0.21	4.04008e-30	help
OTUB1	2.31616e-34	-0.123096	0.065	0.197	4.04541e-30	help
FAU	2.45352e-34	0.224265	0.999	0.994	4.28531e-30	help
RASSF5	2.74352e-34	-0.137302	0.111	0.271	4.79184e-30	help
TMEM173	2.8154e-34	-0.134448	0.087	0.233	4.91738e-30	help
TAF7	3.04354e-34	-0.132086	0.099	0.253	5.31585e-30	help
DEF6	3.12261e-34	-0.123185	0.074	0.211	5.45395e-30	help
UXS1	3.75608e-34	-0.111976	0.05	0.168	6.56037e-30	help
MMADHC	4.05496e-34	-0.139702	0.094	0.243	7.08239e-30	help
ARPC3	4.27177e-34	-0.227228	0.463	0.659	7.46108e-30	help
LAPTM5	5.74969e-34	-0.233837	0.455	0.646	1.00424e-29	help
EIF3M	6.10056e-34	-0.178143	0.228	0.429	1.06552e-29	help
SLC25A6	9.03333e-34	-0.236232	0.7	0.845	1.57776e-29	help
NOSIP	1.18727e-33	-0.193081	0.234	0.438	2.07369e-29	help
PPIB	1.25961e-33	-0.186784	0.253	0.457	2.20003e-29	help
CORO1B	1.40784e-33	-0.230736	0.212	0.395	2.45894e-29	help
OPTN	1.51532e-33	-0.14284	0.117	0.278	2.64666e-29	help
CCM2	1.6042e-33	-0.109778	0.052	0.17	2.80189e-29	help
TIGIT	1.78757e-33	-0.114839	0.018	0.098	3.12217e-29	help
MOB4	1.84663e-33	-0.103086	0.038	0.144	3.22532e-29	help
EIF4H	1.97134e-33	-0.121859	0.072	0.206	3.44314e-29	help
PFDN6	2.10883e-33	-0.104591	0.041	0.148	3.68328e-29	help
SARS	2.64629e-33	-0.113131	0.063	0.191	4.62201e-29	help
ANP32A	3.76514e-33	-0.122511	0.074	0.209	6.5762e-29	help
SF3B2	3.95276e-33	-0.146527	0.138	0.308	6.90389e-29	help
SYNE2	4.27263e-33	-0.186198	0.253	0.463	7.46258e-29	help
TCP1	4.4406e-33	-0.124879	0.076	0.21	7.75596e-29	help
PDHB	5.20668e-33	-0.104401	0.047	0.161	9.09399e-29	help
CAPN2	5.44588e-33	-0.114112	0.087	0.232	9.51178e-29	help
TAGAP	6.30297e-33	-0.126162	0.074	0.208	1.10088e-28	help
VSIR	7.26377e-33	-0.141915	0.096	0.243	1.26869e-28	help
PRDX3	7.43906e-33	-0.11222	0.052	0.168	1.29931e-28	help
MRPS6	7.55872e-33	-0.13426	0.095	0.243	1.32021e-28	help
IQGAP2	9.09879e-33	-0.138462	0.084	0.223	1.5892e-28	help
CCSER2	1.10231e-32	-0.123041	0.069	0.198	1.92529e-28	help
RNF167	1.12424e-32	-0.118669	0.063	0.189	1.96359e-28	help
PSMC6	1.16681e-32	-0.122697	0.077	0.211	2.03795e-28	help
RRAGA	1.48245e-32	-0.100579	0.035	0.136	2.58924e-28	help
SNRPD3	1.51995e-32	-0.139765	0.097	0.243	2.65474e-28	help
HADHA	1.62643e-32	-0.135338	0.11	0.264	2.84072e-28	help
RABAC1	2.06043e-32	-0.161149	0.188	0.374	3.59875e-28	help
HTATSF1	2.29259e-32	-0.109532	0.054	0.171	4.00423e-28	help
SERBP1	2.51601e-32	-0.150391	0.251	0.464	4.39447e-28	help
GLOD4	2.5624e-32	-0.100851	0.039	0.143	4.47549e-28	help
PSMB8	3.06573e-32	-0.182015	0.247	0.447	5.3546e-28	help
PMF1	3.63947e-32	-0.112656	0.062	0.185	6.35669e-28	help
EVI2B	4.09141e-32	-0.15722	0.142	0.31	7.14606e-28	help
NDUFA12	4.60124e-32	-0.149625	0.146	0.314	8.03653e-28	help
USP10	5.32874e-32	-0.183175	0.096	0.238	9.30717e-28	help
FKBP3	5.41043e-32	-0.110006	0.06	0.183	9.44985e-28	help
SF3B6	5.90641e-32	-0.157191	0.166	0.343	1.03161e-27	help
PTGES3	6.76228e-32	-0.164104	0.18	0.361	1.1811e-27	help
CCT6A	7.30631e-32	-0.12959	0.111	0.266	1.27612e-27	help
SNRPC	7.76782e-32	-0.119254	0.076	0.208	1.35673e-27	help
UBE2I	7.78187e-32	-0.155323	0.164	0.34	1.35918e-27	help
SMC3	1.07661e-31	-0.13009	0.091	0.233	1.88041e-27	help
IFITM1	1.40439e-31	-0.262897	0.209	0.39	2.45291e-27	help
MRPL3	1.42338e-31	-0.106352	0.051	0.163	2.48608e-27	help
ST13	1.49434e-31	-0.151744	0.187	0.371	2.61001e-27	help
DNAJB6	1.67009e-31	-0.138258	0.145	0.316	2.91698e-27	help
BUD23	1.8225e-31	-0.103927	0.054	0.17	3.18318e-27	help
OCIAD1	2.19523e-31	-0.128402	0.086	0.223	3.83419e-27	help
PGAM1	2.25043e-31	-0.142097	0.154	0.328	3.93059e-27	help
ATP6V0E1	2.76923e-31	-0.173533	0.261	0.467	4.83674e-27	help
RBM39	2.9085e-31	-0.177315	0.265	0.47	5.07999e-27	help
TMCO1	3.5432e-31	-0.129742	0.114	0.268	6.18856e-27	help
APOBEC3G	4.54468e-31	-0.141734	0.092	0.232	7.93774e-27	help
BTG2	4.61372e-31	-0.137618	0.062	0.182	8.05832e-27	help
EMC7	4.93668e-31	-0.118079	0.073	0.202	8.62241e-27	help
PDCD10	5.56602e-31	-0.122906	0.091	0.231	9.72161e-27	help
GIMAP4	6.32505e-31	-0.203335	0.309	0.515	1.10473e-26	help
SEPT9	6.39013e-31	-0.148747	0.184	0.367	1.1161e-26	help
NUDT5	7.08806e-31	-0.111683	0.067	0.191	1.238e-26	help
COPS6	7.86379e-31	-0.140034	0.11	0.259	1.37349e-26	help
JAML	7.95873e-31	-0.135022	0.074	0.202	1.39007e-26	help
RNF166	8.27705e-31	-0.11365	0.058	0.175	1.44567e-26	help
PARK7	9.81276e-31	-0.181999	0.26	0.455	1.7139e-26	help
COMMD7	1.7625e-30	-0.13192	0.095	0.234	3.07838e-26	help
ERP44	1.88612e-30	-0.104409	0.052	0.164	3.2943e-26	help
SPCS2	2.05132e-30	-0.164813	0.23	0.423	3.58284e-26	help
FERMT3	2.15076e-30	-0.110016	0.055	0.169	3.75652e-26	help
TMBIM4	2.95401e-30	-0.148701	0.181	0.361	5.15947e-26	help
GMFG	3.15562e-30	-0.232105	0.51	0.68	5.5116e-26	help
HNRNPH1	3.32196e-30	1.02085	0.372	0.199	5.80213e-26	help
ATRX	3.34447e-30	-0.134271	0.152	0.322	5.84144e-26	help
ARL6IP1	3.52557e-30	-0.13301	0.103	0.247	6.15777e-26	help
VBP1	4.50208e-30	-0.105147	0.057	0.171	7.86332e-26	help
PSMC3	4.76732e-30	-0.115258	0.071	0.195	8.32661e-26	help
SELENOT	7.12628e-30	-0.159841	0.176	0.349	1.24468e-25	help
PDIA6	7.77643e-30	-0.125474	0.109	0.257	1.35823e-25	help
BIN1	1.58835e-29	-0.140935	0.148	0.31	2.77421e-25	help
PSMA7	1.58892e-29	-0.188873	0.313	0.518	2.77521e-25	help
CCNH	2.36951e-29	-0.101211	0.051	0.159	4.13858e-25	help
MRPS7	2.42843e-29	-0.104934	0.064	0.183	4.2415e-25	help
MORF4L1	2.43077e-29	-0.145092	0.273	0.48	4.24558e-25	help
DPP7	2.71283e-29	-0.130722	0.105	0.247	4.73824e-25	help
KIF5B	3.1206e-29	-0.12721	0.122	0.275	5.45044e-25	help
MED4	5.59035e-29	-0.123331	0.1	0.239	9.76411e-25	help
IMP3	6.01932e-29	-0.142824	0.133	0.286	1.05133e-24	help
BZW1	6.55327e-29	-0.115851	0.121	0.272	1.14459e-24	help
ATRAID	7.47351e-29	-0.125408	0.1	0.238	1.30532e-24	help
LTB	1.08432e-28	-0.467955	0.821	0.856	1.89388e-24	help
CD37	1.13104e-28	-0.183331	0.389	0.6	1.97548e-24	help
MAP1LC3B	1.23279e-28	-0.113885	0.095	0.232	2.15319e-24	help
WAS	1.41321e-28	-0.115765	0.085	0.215	2.46832e-24	help
SH2D2A	1.94197e-28	-0.11236	0.072	0.194	3.39184e-24	help
IGBP1	2.11828e-28	-0.145614	0.141	0.295	3.69978e-24	help
HNRNPR	2.28337e-28	-0.123564	0.107	0.248	3.98813e-24	help
PIK3IP1	2.60468e-28	-0.152418	0.151	0.308	4.54933e-24	help
NUCB1	2.87926e-28	-0.104927	0.061	0.175	5.02892e-24	help
FLT3LG	3.08717e-28	-0.152093	0.193	0.367	5.39206e-24	help
PASK	3.38836e-28	-0.102886	0.04	0.137	5.91811e-24	help
FKBP8	3.39572e-28	-0.135907	0.148	0.308	5.93097e-24	help
ARHGAP30	3.78842e-28	-0.134846	0.143	0.3	6.61685e-24	help
SNRNP70	3.96575e-28	-0.105401	0.055	0.163	6.92659e-24	help
SARAF	4.70482e-28	-0.238423	0.538	0.72	8.21744e-24	help
FYB1	4.88756e-28	-0.183838	0.311	0.516	8.53662e-24	help
RHOG	5.51462e-28	-0.145234	0.136	0.289	9.63183e-24	help
CLIC1	6.45644e-28	-0.23715	0.45	0.617	1.12768e-23	help
SOCS2	6.69346e-28	-0.140963	0.08	0.203	1.16908e-23	help
SBDS	8.47619e-28	-0.110246	0.066	0.182	1.48045e-23	help
SRSF9	1.74262e-27	-0.107133	0.068	0.185	3.04365e-23	help
PSMC1	1.83761e-27	-0.116141	0.077	0.199	3.20957e-23	help
OCIAD2	1.84707e-27	-0.166581	0.29	0.485	3.22609e-23	help
DHPS	2.25522e-27	-0.103181	0.055	0.161	3.93897e-23	help
NPM1	2.3904e-27	-0.191191	0.795	0.88	4.17508e-23	help
DDX24	2.64819e-27	-0.16046	0.212	0.389	4.62532e-23	help
MUC20-OT1	3.20303e-27	-0.108565	0.074	0.194	5.59442e-23	help
PFDN2	4.29339e-27	-0.114077	0.104	0.241	7.49884e-23	help
SPSB3	5.05346e-27	-0.104968	0.07	0.187	8.82638e-23	help
GLRX3	5.07306e-27	-0.110006	0.065	0.178	8.86061e-23	help
TMEM165	5.20125e-27	-0.111178	0.075	0.194	9.0845e-23	help
CCR7	5.23348e-27	-0.117633	0.087	0.215	9.1408e-23	help
DYNLL1	7.85904e-27	-0.176561	0.258	0.444	1.37266e-22	help
PSMB7	8.20597e-27	-0.128677	0.119	0.26	1.43326e-22	help
CCT8	8.37525e-27	-0.135286	0.152	0.307	1.46282e-22	help
VDAC1	1.72321e-26	-0.123084	0.143	0.295	3.00976e-22	help
TWF2	1.73567e-26	-0.117823	0.077	0.195	3.03152e-22	help
RBM8A	1.75434e-26	-0.13369	0.163	0.323	3.06413e-22	help
XRN2	1.82961e-26	-0.133898	0.136	0.284	3.1956e-22	help
MCUB	1.83791e-26	-0.126218	0.137	0.286	3.2101e-22	help
COX7A2L	2.23715e-26	-0.163016	0.247	0.424	3.9074e-22	help
RNPS1	2.26274e-26	-0.122361	0.138	0.289	3.9521e-22	help
POLR2J3.1	2.39834e-26	-0.152369	0.215	0.389	4.18894e-22	help
TANK	2.5954e-26	-0.122377	0.096	0.225	4.53312e-22	help
IDH2	3.42758e-26	-0.129033	0.105	0.238	5.98661e-22	help
PSMA1	3.6865e-26	-0.135049	0.185	0.352	6.43884e-22	help
ZNF90	4.10963e-26	0.162395	0.182	0.039	7.17788e-22	help
GBP2	4.77932e-26	-0.135162	0.141	0.292	8.34756e-22	help
MSN	5.21455e-26	-0.153103	0.199	0.366	9.10773e-22	help
COX6A1	5.21796e-26	-0.166974	0.317	0.511	9.11368e-22	help
C12orf57	5.34705e-26	-0.146248	0.168	0.325	9.33916e-22	help
RAP1A	5.87928e-26	-0.146326	0.211	0.384	1.02687e-21	help
LMAN2	6.10132e-26	-0.118918	0.101	0.232	1.06566e-21	help
VPS51	7.28272e-26	-0.108327	0.076	0.193	1.272e-21	help
CSNK2B	7.35492e-26	-0.120087	0.122	0.263	1.28461e-21	help
GDI2	8.62232e-26	-0.109254	0.113	0.252	1.50597e-21	help
SAMHD1	9.07823e-26	-0.119533	0.171	0.334	1.5856e-21	help
SH3KBP1	1.04536e-25	-0.11148	0.118	0.259	1.82583e-21	help
ATP5MPL	1.26489e-25	0.22048	0.601	0.424	2.20926e-21	help
RSL1D1	1.81063e-25	-0.153082	0.236	0.411	3.16244e-21	help
RHOA	1.86096e-25	-0.136952	0.223	0.4	3.25036e-21	help
SLC9A3R1	2.07559e-25	-0.100203	0.071	0.185	3.62522e-21	help
CDC37	2.16197e-25	-0.12295	0.138	0.284	3.77609e-21	help
ATP5PO	2.1729e-25	-0.15582	0.313	0.508	3.79518e-21	help
HAX1	2.20349e-25	-0.124903	0.133	0.276	3.84862e-21	help
SLC25A5	2.231e-25	-0.170708	0.282	0.461	3.89667e-21	help
CRYBG1	2.48318e-25	-0.116726	0.089	0.211	4.33712e-21	help
PTGER2	2.61245e-25	-0.140692	0.123	0.26	4.5629e-21	help
H2AFY	2.8651e-25	-0.111727	0.113	0.249	5.00418e-21	help
PPA1	2.88149e-25	-0.155675	0.262	0.439	5.03281e-21	help
ERH	3.25065e-25	-0.15448	0.228	0.398	5.67759e-21	help
TPI1	3.40892e-25	-0.214524	0.327	0.493	5.95402e-21	help
TCEAL8	3.41329e-25	-0.108087	0.076	0.191	5.96165e-21	help
SSBP1	4.00023e-25	-0.134035	0.172	0.328	6.9868e-21	help
UBE2D3	4.08327e-25	-0.168396	0.354	0.554	7.13183e-21	help
PPM1G	4.34593e-25	-0.121078	0.126	0.267	7.59061e-21	help
PPHLN1	4.48719e-25	-0.109036	0.093	0.218	7.83732e-21	help
PDE4B	4.8426e-25	-0.118501	0.074	0.187	8.45809e-21	help
TPR	4.85713e-25	-0.151471	0.156	0.306	8.48346e-21	help
EWSR1	4.9327e-25	-0.107628	0.087	0.208	8.61545e-21	help
RBMX	5.38931e-25	-0.114422	0.149	0.301	9.41296e-21	help
THOC7	5.59449e-25	-0.125686	0.12	0.256	9.77133e-21	help
TRMT112	6.00437e-25	-0.152903	0.261	0.443	1.04872e-20	help
IMPDH2	6.16751e-25	-0.110465	0.079	0.195	1.07722e-20	help
UBE2L3	6.32593e-25	-0.127623	0.161	0.315	1.10489e-20	help
CST7	8.12284e-25	-0.118282	0.064	0.171	1.41874e-20	help
SQSTM1	8.8718e-25	-0.116587	0.084	0.201	1.54955e-20	help
HSD17B10	1.02093e-24	-0.112377	0.075	0.187	1.78315e-20	help
NFKBIA	1.35151e-24	-0.12598	0.116	0.253	2.36054e-20	help
TMA7	1.74377e-24	0.240777	0.89	0.837	3.04567e-20	help
UQCRB	1.77157e-24	-0.18367	0.755	0.867	3.09422e-20	help
LPXN	1.8636e-24	-0.115991	0.098	0.223	3.25496e-20	help
NOP56	1.9486e-24	-0.105311	0.087	0.207	3.40342e-20	help
EIF4B	1.97474e-24	-0.117807	0.214	0.385	3.44908e-20	help
TAGLN2	2.62646e-24	-0.129479	0.16	0.309	4.58737e-20	help
PSAP	3.15214e-24	-0.107598	0.06	0.163	5.50553e-20	help
VAMP2	3.37642e-24	-0.145777	0.261	0.438	5.89725e-20	help
NUTF2	4.13119e-24	-0.109037	0.091	0.211	7.21554e-20	help
WDR1	4.66106e-24	-0.108569	0.094	0.216	8.14101e-20	help
NME1	5.32787e-24	-0.109041	0.076	0.187	9.30566e-20	help
TNFRSF25	5.86793e-24	-0.111709	0.123	0.26	1.02489e-19	help
BUD31	6.14561e-24	-0.113186	0.104	0.231	1.07339e-19	help
XBP1	6.4576e-24	-0.129095	0.19	0.351	1.12788e-19	help
YPEL3	6.82576e-24	-0.104993	0.075	0.186	1.19219e-19	help
YWHAB	7.91556e-24	-0.124444	0.363	0.575	1.38253e-19	help
SH3BGRL	8.8255e-24	-0.125842	0.149	0.295	1.54146e-19	help
RAB18	9.10081e-24	-0.113227	0.093	0.214	1.58955e-19	help
MRPL54	1.00934e-23	-0.120822	0.134	0.272	1.76292e-19	help
UBXN1	1.08124e-23	-0.166688	0.314	0.494	1.8885e-19	help
RTN4	1.2496e-23	-0.10489	0.101	0.225	2.18255e-19	help
PSMB9	1.56015e-23	-0.156473	0.29	0.477	2.72495e-19	help
GPR171	1.60794e-23	-0.161809	0.151	0.291	2.80843e-19	help
CARD16	1.8705e-23	-0.131813	0.135	0.272	3.26701e-19	help
BRK1	2.25991e-23	-0.145935	0.293	0.475	3.94715e-19	help
RCSD1	2.48882e-23	-0.15744	0.169	0.314	4.34698e-19	help
TMC6	2.52376e-23	-0.117586	0.12	0.252	4.408e-19	help
TMSB4X	2.52578e-23	-0.155824	1	1	4.41152e-19	help
SF3B1	2.64669e-23	-0.125685	0.128	0.263	4.62271e-19	help
ATP5MC3	2.66738e-23	-0.149532	0.264	0.438	4.65884e-19	help
TNFAIP8	2.72354e-23	-0.121191	0.177	0.331	4.75694e-19	help
AC016831.5	3.16785e-23	-0.106789	0.114	0.244	5.53297e-19	help
TMEM9B	3.34325e-23	-0.111175	0.081	0.193	5.83932e-19	help
UFC1	3.64922e-23	-0.143469	0.198	0.354	6.37373e-19	help
H3F3B	3.93279e-23	-0.185311	0.825	0.883	6.869e-19	help
METTL9	4.01083e-23	-0.125431	0.135	0.271	7.00532e-19	help
UBE2N	5.96854e-23	-0.109906	0.137	0.276	1.04247e-18	help
FLNA	6.60834e-23	-0.112239	0.152	0.298	1.15421e-18	help
NDUFB5	6.80098e-23	-0.117052	0.135	0.271	1.18786e-18	help
CD63	7.69697e-23	-0.115919	0.1	0.221	1.34435e-18	help
C11orf58	9.24628e-23	-0.12505	0.228	0.395	1.61496e-18	help
ESD	1.60016e-22	-0.107868	0.094	0.211	2.79484e-18	help
HMGB2	1.83456e-22	-0.155742	0.22	0.384	3.20424e-18	help
NDUFV2	1.94818e-22	-0.13015	0.194	0.349	3.40269e-18	help
DDIT4	1.98415e-22	-0.20691	0.336	0.508	3.46552e-18	help
ARID5A	2.06971e-22	-0.109752	0.078	0.186	3.61496e-18	help
CRBN	2.33694e-22	-0.110808	0.123	0.254	4.0817e-18	help
LYZ	2.34014e-22	0.305538	0.167	0.039	4.08729e-18	help
ITSN2	2.4938e-22	-0.104084	0.086	0.199	4.35567e-18	help
GTF3A	4.39231e-22	-0.143358	0.362	0.551	7.67161e-18	help
ARID4B	4.70924e-22	-0.127726	0.165	0.309	8.22516e-18	help
LIMD2	4.74197e-22	-0.167038	0.311	0.483	8.28233e-18	help
ITGB1	4.81784e-22	-0.183279	0.28	0.443	8.41483e-18	help
NDUFS7	5.14687e-22	-0.123578	0.129	0.259	8.98952e-18	help
EIF2S2	5.77151e-22	-0.122613	0.176	0.324	1.00805e-17	help
CD164	6.38081e-22	-0.114339	0.139	0.274	1.11447e-17	help
TRIR	6.43147e-22	-0.121847	0.363	0.559	1.12332e-17	help
EDF1	6.67746e-22	-0.151003	0.437	0.634	1.16628e-17	help
UQCRFS1	1.06081e-21	-0.115291	0.133	0.264	1.85281e-17	help
DYNLRB1	1.08496e-21	-0.117066	0.132	0.262	1.89499e-17	help
RBM3	1.16999e-21	0.246929	0.492	0.345	2.04351e-17	help
GABARAPL2	1.34941e-21	-0.134162	0.2	0.352	2.35687e-17	help
RAD23A	1.46881e-21	-0.108119	0.112	0.236	2.56543e-17	help
GZMK	1.50088e-21	-0.27813	0.046	0.13	2.62144e-17	help
CYCS	1.52632e-21	-0.122333	0.165	0.306	2.66587e-17	help
MANF	1.68877e-21	-0.104132	0.095	0.21	2.9496e-17	help
TRAM1	2.05479e-21	-0.115729	0.157	0.298	3.58889e-17	help
RARRES3	2.16305e-21	-0.196288	0.322	0.479	3.77798e-17	help
PIN4	2.19939e-21	-0.100679	0.078	0.184	3.84146e-17	help
FBXW5	2.72422e-21	-0.100991	0.085	0.194	4.75812e-17	help
DCK	2.9729e-21	-0.10415	0.102	0.218	5.19247e-17	help
DPP4	3.03745e-21	-0.100976	0.079	0.185	5.30521e-17	help
STAT3	3.0685e-21	-0.104517	0.125	0.253	5.35945e-17	help
ARL14EP	3.07684e-21	-0.100733	0.081	0.189	5.37401e-17	help
LEF1	3.45641e-21	-0.108328	0.071	0.172	6.03696e-17	help
HNRNPA1	4.93328e-21	-0.167084	0.77	0.885	8.61646e-17	help
EIF2A	5.64979e-21	-0.110817	0.135	0.264	9.86793e-17	help
LDHA	6.26598e-21	-0.200577	0.433	0.579	1.09442e-16	help
DPY30	7.00716e-21	-0.103512	0.112	0.232	1.22387e-16	help
CCND3	9.34102e-21	-0.118626	0.187	0.334	1.6315e-16	help
FAM215B	1.17374e-20	-0.10122	0.087	0.194	2.05005e-16	help
ZC3H15	1.19083e-20	-0.119301	0.164	0.303	2.0799e-16	help
OFD1	1.22277e-20	-0.100831	0.09	0.2	2.13569e-16	help
UBXN4	1.32967e-20	-0.113443	0.137	0.266	2.3224e-16	help
TMEM123	1.39392e-20	-0.143628	0.259	0.416	2.43461e-16	help
PPP1CC	1.51309e-20	-0.109926	0.13	0.256	2.64277e-16	help
ARF5	1.70961e-20	-0.102467	0.095	0.206	2.986e-16	help
GSTO1	1.78673e-20	-0.108803	0.118	0.24	3.1207e-16	help
CYTH1	1.86399e-20	-0.102494	0.125	0.251	3.25565e-16	help
FKBP11	2.00267e-20	-0.137179	0.207	0.354	3.49787e-16	help
APEX1	2.01505e-20	-0.102555	0.102	0.216	3.51949e-16	help
NDUFAB1	2.3052e-20	-0.100676	0.13	0.257	4.02627e-16	help
EIF3E	2.53924e-20	-0.16972	0.689	0.813	4.43504e-16	help
SMC4	2.5981e-20	-0.105478	0.075	0.176	4.53785e-16	help
CCNI	2.93058e-20	-0.182482	0.472	0.628	5.11856e-16	help
TXNIP	3.25767e-20	-0.219108	0.67	0.784	5.68984e-16	help
TYROBP	3.32749e-20	0.120403	0.172	0.048	5.8118e-16	help
RACK1	4.79927e-20	-0.135245	0.984	0.99	8.38241e-16	help
MRFAP1	4.99279e-20	-0.101375	0.099	0.211	8.72041e-16	help
EIF1AX	5.5235e-20	-0.116893	0.172	0.31	9.64735e-16	help
TPM3	5.65299e-20	-0.100024	0.271	0.445	9.8735e-16	help
CD44	5.77238e-20	-0.132424	0.339	0.521	1.0082e-15	help
TLN1	5.90785e-20	-0.110376	0.118	0.238	1.03186e-15	help
PAIP2	6.09853e-20	-0.121089	0.164	0.299	1.06517e-15	help
PRR13	7.79565e-20	-0.102635	0.237	0.4	1.36159e-15	help
TRAPPC1	9.11596e-20	-0.128502	0.22	0.37	1.59219e-15	help
ADD3	9.20448e-20	-0.114082	0.179	0.318	1.60765e-15	help
SRSF3	9.71714e-20	-0.115224	0.271	0.434	1.69719e-15	help
AKAP13	1.01966e-19	-0.113551	0.147	0.277	1.78094e-15	help
RANBP1	1.31326e-19	-0.107959	0.18	0.323	2.29374e-15	help
SAMSN1	1.55974e-19	-0.104872	0.098	0.208	2.72423e-15	help
SUPT4H1	1.61036e-19	-0.111509	0.128	0.248	2.81265e-15	help
ARPC5	1.6594e-19	-0.119749	0.207	0.357	2.89831e-15	help
DCTN3	1.81623e-19	-0.104904	0.114	0.23	3.17222e-15	help
TNFRSF18	1.90023e-19	-0.12193	0.124	0.243	3.31894e-15	help
VCAN	2.00227e-19	0.103471	0.119	0.017	3.49716e-15	help
ESYT1	2.07134e-19	-0.103657	0.096	0.203	3.61781e-15	help
SRSF8	2.50276e-19	-0.105337	0.108	0.221	4.37132e-15	help
SERPINB1	2.53807e-19	-0.104422	0.107	0.22	4.43298e-15	help
FAM49B	2.78036e-19	-0.107092	0.165	0.301	4.85617e-15	help
EIF5	3.42163e-19	-0.114432	0.158	0.289	5.97621e-15	help
FNBP1	3.60915e-19	-0.11456	0.216	0.366	6.30374e-15	help
HLA-F	3.79338e-19	-0.106135	0.134	0.257	6.62552e-15	help
CLNS1A	3.86125e-19	-0.106159	0.141	0.267	6.74405e-15	help
CCNL1	7.64112e-19	-0.101089	0.149	0.277	1.3346e-14	help
ROCK1	1.02944e-18	-0.10001	0.121	0.238	1.79803e-14	help
PPDPF	1.06364e-18	-0.172361	0.537	0.68	1.85775e-14	help
SRRM2	1.12493e-18	-0.112861	0.169	0.301	1.9648e-14	help
ARPC1B	2.3847e-18	-0.13376	0.369	0.544	4.16512e-14	help
EEF1D	2.95235e-18	0.171392	0.982	0.969	5.15657e-14	help
CFLAR	3.01485e-18	-0.108602	0.207	0.347	5.26574e-14	help
CSDE1	3.05086e-18	-0.116479	0.166	0.295	5.32863e-14	help
UBA52	3.17187e-18	0.156842	0.999	0.982	5.53998e-14	help
GPSM3	3.24395e-18	-0.147639	0.326	0.483	5.66589e-14	help
RBL2	3.79239e-18	-0.100695	0.163	0.293	6.62379e-14	help
CNIH1	4.02954e-18	-0.106272	0.115	0.225	7.03799e-14	help
PSMG2	4.54887e-18	-0.102948	0.131	0.248	7.94506e-14	help
CD27	5.38775e-18	-0.156579	0.139	0.252	9.41025e-14	help
SNX6	6.87738e-18	-0.1037	0.137	0.256	1.2012e-13	help
EIF4G2	7.43136e-18	-0.105143	0.168	0.297	1.29796e-13	help
CALM3	7.56636e-18	-0.11296	0.144	0.264	1.32154e-13	help
CMTM6	1.25139e-17	-0.128625	0.192	0.326	2.18568e-13	help
GAPDH	1.95679e-17	-0.164785	0.934	0.956	3.41773e-13	help
TOMM7	2.06042e-17	0.200183	0.888	0.817	3.59874e-13	help
SEC11A	2.77022e-17	-0.106475	0.178	0.308	4.83847e-13	help
NDUFA11	3.10632e-17	-0.11584	0.272	0.423	5.42549e-13	help
IKZF1	3.57776e-17	-0.134424	0.271	0.415	6.24891e-13	help
COX5A	3.82778e-17	-0.116491	0.243	0.386	6.6856e-13	help
ATP5IF1	4.11297e-17	-0.117336	0.27	0.417	7.18372e-13	help
PPP1R2	4.16184e-17	-0.109611	0.214	0.353	7.26908e-13	help
H2AFV	4.19292e-17	-0.10499	0.176	0.305	7.32335e-13	help
RAP1B	4.31158e-17	-0.110575	0.237	0.382	7.5306e-13	help
GIMAP1	5.00135e-17	-0.117171	0.166	0.287	8.73536e-13	help
SNU13	6.78935e-17	-0.122059	0.245	0.385	1.18583e-12	help
NSA2	7.04085e-17	-0.105954	0.215	0.353	1.22976e-12	help
ID2	7.55627e-17	-0.175393	0.198	0.325	1.31978e-12	help
SIGIRR	7.78503e-17	-0.10149	0.144	0.261	1.35973e-12	help
NDUFC2	8.02099e-17	-0.104168	0.188	0.32	1.40095e-12	help
IFI44L	9.07184e-17	0.177561	0.251	0.124	1.58449e-12	help
RORA	1.22724e-16	-0.136013	0.279	0.428	2.1435e-12	help
REX1BD	2.08645e-16	-0.100925	0.158	0.278	3.64419e-12	help
ISG20	2.24856e-16	-0.141565	0.445	0.614	3.92734e-12	help
CDC42SE1	2.35297e-16	0.853965	0.359	0.255	4.10969e-12	help
ERGIC3	2.72969e-16	-0.10681	0.147	0.261	4.76768e-12	help
DUT	3.16604e-16	-0.103167	0.157	0.276	5.52981e-12	help
CD40LG	3.17559e-16	-0.10702	0.133	0.244	5.54649e-12	help
PFDN5	3.72452e-16	0.173111	0.944	0.92	6.50525e-12	help
SEC62	3.85081e-16	-0.10518	0.228	0.366	6.72583e-12	help
NSD3	5.24167e-16	-0.106546	0.194	0.323	9.15509e-12	help
EPC1	6.74815e-16	-0.105223	0.191	0.318	1.17863e-11	help
TMSB10	7.45502e-16	0.240154	1	0.999	1.30209e-11	help
S100A10	1.13838e-15	-0.160025	0.625	0.737	1.9883e-11	help
TC2N	1.19235e-15	-0.105697	0.144	0.254	2.08256e-11	help
RSRP1	1.24959e-15	-0.10622	0.162	0.278	2.18254e-11	help
PSME1	1.33477e-15	-0.137963	0.514	0.656	2.3313e-11	help
DDT	1.90099e-15	-0.100371	0.191	0.316	3.32027e-11	help
S100A8	2.25916e-15	0.13286	0.203	0.087	3.94584e-11	help
PAXX	2.50596e-15	-0.120983	0.219	0.344	4.37692e-11	help
BIRC3	2.86795e-15	-0.10566	0.118	0.22	5.00916e-11	help
NDUFB9	4.84812e-15	-0.112095	0.264	0.401	8.46773e-11	help
ANKRD12	6.40641e-15	-0.102876	0.324	0.477	1.11894e-10	help
SELENOK	8.1973e-15	-0.10008	0.183	0.303	1.43174e-10	help
ATP5PB	1.40085e-14	-0.104401	0.195	0.315	2.44673e-10	help
B4GALT1	1.69576e-14	0.360775	0.19	0.09	2.96181e-10	help
CYTOR	1.7484e-14	-0.130645	0.211	0.333	3.05375e-10	help
RSL24D1	1.87915e-14	-0.111262	0.288	0.425	3.28212e-10	help
SF1	2.62759e-14	-0.103865	0.208	0.331	4.58935e-10	help
CUTA	4.86515e-14	-0.114505	0.277	0.408	8.49747e-10	help
AL136454.1	7.26014e-14	0.112167	0.152	0.057	1.26806e-09	help
S100A9	7.90714e-14	0.101642	0.178	0.074	1.38106e-09	help
SET	8.29466e-14	0.488744	0.366	0.262	1.44875e-09	help
RTRAF	8.63733e-14	-0.107441	0.259	0.39	1.5086e-09	help
HMGN2	9.96857e-14	-0.102701	0.247	0.378	1.74111e-09	help
NPC2	1.39834e-13	0.112283	0.219	0.109	2.44235e-09	help
AC010761.1	1.64096e-13	0.15599	0.06	0	2.86611e-09	help
OST4	2.56379e-13	0.163566	0.798	0.713	4.47791e-09	help
PPP1CB	2.85289e-13	0.37581	0.261	0.16	4.98286e-09	help
LEPROTL1	3.9118e-13	-0.139683	0.307	0.432	6.83234e-09	help
AC092069.1	5.63004e-13	0.244111	0.074	0.009	9.83342e-09	help
ANP32B	5.98537e-13	-0.108435	0.296	0.423	1.0454e-08	help
ALOX5AP	1.34073e-12	-0.103771	0.242	0.366	2.34172e-08	help
IFITM2	1.39197e-12	-0.147039	0.477	0.591	2.43122e-08	help
PPIA	1.44718e-12	-0.117331	0.596	0.706	2.52764e-08	help
GZMA	2.03054e-11	-0.201677	0.135	0.22	3.54654e-07	help
GYPC	2.12274e-11	-0.12354	0.271	0.382	3.70758e-07	help
CDC42	2.18136e-11	0.777832	0.443	0.38	3.80997e-07	help
BTF3	3.86297e-11	-0.104508	0.882	0.928	6.74706e-07	help
MIF	4.87721e-11	0.121693	0.627	0.506	8.51854e-07	help
C16orf54	7.93032e-11	0.381108	0.267	0.179	1.38511e-06	help
EIF5A	1.44491e-10	0.252983	0.27	0.178	2.52368e-06	help
KIFC1	5.1882e-10	0.121881	0.047	0.002	9.06171e-06	help
ATP5MD	1.38809e-09	0.146798	0.531	0.453	2.42445e-05	help
MDM4	1.55262e-09	0.300592	0.226	0.146	2.71181e-05	help
NKG7	5.46649e-09	-0.100444	0.094	0.161	9.54777e-05	help
CAPZA1	5.58959e-09	0.42528	0.343	0.275	9.76279e-05	help
OAZ1	7.28992e-09	-0.111803	0.684	0.751	0.000127326	help
PHKG1	8.81083e-09	0.135956	0.086	0.03	0.00015389	help
CTNNB1	1.45559e-08	0.28683	0.172	0.103	0.000254233	help
RASSF3	5.41497e-08	0.271488	0.151	0.087	0.000945779	help
ZC3H4	6.15326e-08	0.157566	0.089	0.036	0.00107473	help
SEC61G	9.25814e-08	0.114782	0.505	0.418	0.00161703	help
S100A11	1.46125e-07	-0.112369	0.659	0.714	0.00255222	help
COX6B1	2.02388e-07	0.117553	0.654	0.58	0.0035349	help
AC020656.1	6.07353e-07	0.235122	0.062	0.021	0.010608	help
ATP5ME	8.15244e-07	0.124622	0.412	0.341	0.0142391	help
CTBP1	9.53548e-07	0.171546	0.134	0.078	0.0166547	help
PDCD4	1.17371e-06	0.129458	0.218	0.318	0.0205	help
SERF2	1.25477e-06	0.103436	0.918	0.893	0.0219158	help
SERPINB9	1.57047e-06	0.195841	0.116	0.064	0.0274298	help
HLA-A	3.97517e-263	-1.03492	0.825	0.995	6.94302e-259	toxic
B2M	2.75807e-229	-0.644042	1	1	4.81725e-225	toxic
HLA-C	1.87933e-207	-0.748557	0.864	1	3.28243e-203	toxic
UBC	7.71192e-199	-0.776636	0.252	0.849	1.34696e-194	toxic
GZMK	3.61807e-194	-1.31287	0.234	0.755	6.31931e-190	toxic
TRAC	2.18147e-189	-1.05102	0.384	0.867	3.81016e-185	toxic
UBB	3.43042e-182	-0.762616	0.319	0.856	5.99158e-178	toxic
LCK	3.31921e-180	-0.66283	0.212	0.778	5.79734e-176	toxic
HLA-B	2.19235e-174	-0.627009	0.957	0.995	3.82916e-170	toxic
CORO1A	5.59895e-173	-0.847561	0.579	0.923	9.77913e-169	toxic
LSP1	9.38364e-167	-0.680224	0.219	0.757	1.63895e-162	toxic
STK17A	1.63862e-155	-0.627455	0.19	0.704	2.86202e-151	toxic
ARHGDIB	2.33549e-155	-0.709704	0.639	0.944	4.07916e-151	toxic
IL32	5.16022e-151	-0.851723	0.61	0.926	9.01283e-147	toxic
MYL12B	3.85871e-144	-0.611214	0.337	0.84	6.73961e-140	toxic
CD52	4.97156e-141	-0.698278	0.889	0.981	8.68333e-137	toxic
CD3D	1.91245e-140	-0.670549	0.482	0.916	3.34029e-136	toxic
CD27	1.27657e-139	-0.620065	0.18	0.66	2.22966e-135	toxic
CXCR3	8.87343e-138	-0.51163	0.098	0.55	1.54983e-133	toxic
IL2RG	1.37994e-137	-0.506157	0.174	0.673	2.41021e-133	toxic
ACTB	7.99209e-129	-0.76247	0.971	0.998	1.3959e-124	toxic
CXCR4	2.5591e-127	-0.631694	0.351	0.827	4.46972e-123	toxic
APOBEC3G	2.51061e-125	-0.61488	0.198	0.658	4.38503e-121	toxic
UCP2	1.38711e-120	-0.584056	0.204	0.659	2.42273e-116	toxic
EVL	7.00291e-119	-0.559861	0.307	0.763	1.22313e-114	toxic
CFL1	1.55854e-118	-0.612763	0.721	0.952	2.72214e-114	toxic
ITM2C	2.15987e-118	-0.526294	0.066	0.447	3.77243e-114	toxic
PFN1	7.20702e-114	-0.615676	0.889	0.983	1.25878e-109	toxic
ACTG1	4.09576e-113	-0.772002	0.727	0.921	7.15366e-109	toxic
TRBC2	5.81228e-113	-0.793796	0.301	0.713	1.01517e-108	toxic
CD3E	6.43186e-110	-0.486639	0.262	0.72	1.12339e-105	toxic
PPP1CA	1.10909e-107	-0.472249	0.207	0.644	1.93714e-103	toxic
MYL6	6.74211e-107	-0.542246	0.752	0.953	1.17758e-102	toxic
GIMAP7	1.03242e-105	-0.524657	0.395	0.817	1.80322e-101	toxic
SEPT7	2.47994e-105	-0.467775	0.265	0.709	4.33146e-101	toxic
HSPA8	2.93245e-104	-0.520486	0.528	0.876	5.12181e-100	toxic
MYL12A	3.46882e-103	-0.505813	0.662	0.941	6.05864e-99	toxic
GIMAP4	2.86869e-102	-0.539504	0.321	0.74	5.01046e-98	toxic
SEPT1	8.70672e-97	-0.364049	0.113	0.488	1.52072e-92	toxic
ITGB2	1.42624e-96	-0.374625	0.135	0.534	2.49108e-92	toxic
HNRNPK	1.98361e-96	-0.438072	0.226	0.648	3.46457e-92	toxic
NCOR1	3.15777e-96	-0.398265	0.143	0.534	5.51536e-92	toxic
ANXA5	5.7769e-95	-0.339479	0.057	0.385	1.00899e-90	toxic
CAPZB	7.02028e-95	-0.435407	0.194	0.603	1.22616e-90	toxic
RARRES3	1.12145e-94	-0.537503	0.412	0.793	1.95872e-90	toxic
[truncated: 1,238 more rows]

## Sheet: 1f
Supplementary File 1f: List of the DE genes per cluster in Figure 2
Gene.ID	p.value	Avg_logFC	Pct.1	Pct.2	p_val_adj	Cluster.ID
ATG101	6.86824e-28	-0.207639	0	0.231	1.19961e-23	cDCa
TSSC4	1.0219e-22	-0.367973	0.01	0.385	1.78485e-18	cDCa
AIFM1	5.57948e-21	-0.26441	0.002	0.231	9.74512e-17	cDCa
BORCS6	5.91196e-21	-0.199947	0.002	0.231	1.03258e-16	cDCa
IL32	3.50342e-19	-1.72445	0.097	0.846	6.11908e-15	cDCa
FAM98A	4.38258e-19	-0.143101	0	0.154	7.65461e-15	cDCa
CPA5	4.38258e-19	-0.143101	0	0.154	7.65461e-15	cDCa
RIDA	4.38258e-19	-0.143101	0	0.154	7.65461e-15	cDCa
TRMT5	4.38258e-19	-0.143101	0	0.154	7.65461e-15	cDCa
ZG16B	4.38258e-19	-0.143101	0	0.154	7.65461e-15	cDCa
SUGP1	4.38258e-19	-0.143101	0	0.154	7.65461e-15	cDCa
DNAL4	4.38258e-19	-0.143101	0	0.154	7.65461e-15	cDCa
TRAV12-1	4.38321e-19	-0.325422	0	0.154	7.65571e-15	cDCa
MRPL13	2.01337e-18	-0.315816	0.008	0.308	3.51656e-14	cDCa
STK17A	1.54303e-16	-0.783604	0.039	0.538	2.69506e-12	cDCa
NUDT5	4.73046e-16	-0.304409	0.017	0.385	8.26222e-12	cDCa
ERH	3.7088e-15	-0.701436	0.075	0.692	6.4778e-11	cDCa
HACL1	3.79479e-14	-0.201865	0.006	0.231	6.62798e-10	cDCa
CETN3	3.79479e-14	-0.201865	0.006	0.231	6.62798e-10	cDCa
MAP2K3	3.79796e-14	-0.260572	0.006	0.231	6.63352e-10	cDCa
NAT10	4.26074e-14	-0.199947	0.006	0.231	7.4418e-10	cDCa
MATK	4.26074e-14	-0.199947	0.006	0.231	7.4418e-10	cDCa
GRWD1	4.26074e-14	-0.199947	0.006	0.231	7.4418e-10	cDCa
IGBP1	4.8105e-14	-0.554981	0.046	0.538	8.40203e-10	cDCa
TRAC	1.19854e-13	-0.987026	0.087	0.692	2.09336e-09	cDCa
DGKA	2.65507e-13	-0.304409	0.014	0.308	4.63734e-09	cDCa
TBC1D10C	3.0487e-13	-0.350943	0.023	0.385	5.32485e-09	cDCa
APOO	5.55263e-13	-0.205711	0.002	0.154	9.69823e-09	cDCa
CTLA4	5.84644e-13	-0.141172	0.002	0.154	1.02114e-08	cDCa
SLC25A38	5.84644e-13	-0.141172	0.002	0.154	1.02114e-08	cDCa
GLE1	5.84644e-13	-0.141172	0.002	0.154	1.02114e-08	cDCa
UCK1	5.84644e-13	-0.141172	0.002	0.154	1.02114e-08	cDCa
SUV39H2	5.84644e-13	-0.141172	0.002	0.154	1.02114e-08	cDCa
H2AFY2	5.84644e-13	-0.141172	0.002	0.154	1.02114e-08	cDCa
SGF29	5.84644e-13	-0.141172	0.002	0.154	1.02114e-08	cDCa
TMEM199	5.84644e-13	-0.141172	0.002	0.154	1.02114e-08	cDCa
PDK2	5.84644e-13	-0.141172	0.002	0.154	1.02114e-08	cDCa
ETV7	6.48422e-13	-0.139247	0.002	0.154	1.13253e-08	cDCa
ASF1B	6.48422e-13	-0.139247	0.002	0.154	1.13253e-08	cDCa
SUPT4H1	2.85796e-12	-0.501552	0.054	0.538	4.99171e-08	cDCa
DNAAF2	3.46536e-12	-0.258658	0.008	0.231	6.0526e-08	cDCa
FKBP4	3.57795e-12	-0.199947	0.008	0.231	6.24924e-08	cDCa
TNIP2	3.95021e-12	-0.198033	0.008	0.231	6.89944e-08	cDCa
MTHFS	3.95021e-12	-0.198033	0.008	0.231	6.89944e-08	cDCa
ZNF236	3.95021e-12	-0.198033	0.008	0.231	6.89944e-08	cDCa
SAE1	3.95021e-12	-0.198033	0.008	0.231	6.89944e-08	cDCa
TMEM87B	4.3596e-12	-0.196123	0.008	0.231	7.61447e-08	cDCa
IP6K2	4.3597e-12	-0.194216	0.008	0.231	7.61466e-08	cDCa
C1orf123	4.80964e-12	-0.194216	0.008	0.231	8.40052e-08	cDCa
TSN	4.80964e-12	-0.194216	0.008	0.231	8.40052e-08	cDCa
PSMB9	8.47084e-12	-0.712133	0.098	0.692	1.47952e-07	cDCa
EVL	1.75214e-11	-0.655984	0.118	0.769	3.06029e-07	cDCa
MAGOH	2.69495e-11	-0.398491	0.029	0.385	4.70699e-07	cDCa
GZMK	2.75562e-11	-0.534522	0.017	0.308	4.81297e-07	cDCa
CNPPD1	3.80895e-11	-0.237843	0.017	0.308	6.65272e-07	cDCa
RAC2	3.81442e-11	-0.820379	0.108	0.692	6.66227e-07	cDCa
ENOPH1	1.03171e-10	-0.256748	0.01	0.231	1.80198e-06	cDCa
TMEM204	1.09155e-10	-0.198033	0.01	0.231	1.9065e-06	cDCa
ITM2C	1.09287e-10	-0.310096	0.01	0.231	1.90881e-06	cDCa
GAR1	1.19e-10	-0.196123	0.01	0.231	2.07845e-06	cDCa
TUBA4A	1.33057e-10	-0.334199	0.031	0.385	2.32398e-06	cDCa
SNAPIN	1.36221e-10	-0.304409	0.019	0.308	2.37924e-06	cDCa
PCNA	1.36508e-10	-0.402237	0.019	0.308	2.38425e-06	cDCa
TSEN54	1.4864e-10	-0.302521	0.019	0.308	2.59614e-06	cDCa
SNRNP40	1.68936e-10	-0.247251	0.019	0.308	2.95063e-06	cDCa
PPP1R18	1.7042e-10	-0.528025	0.046	0.462	2.97656e-06	cDCa
IK	1.78667e-10	-0.467891	0.062	0.538	3.12059e-06	cDCa
RAB4A	1.9695e-10	-0.295002	0.019	0.308	3.43993e-06	cDCa
ATP6V1D	1.9695e-10	-0.295002	0.019	0.308	3.43993e-06	cDCa
PSMB8	2.30407e-10	-0.637225	0.104	0.692	4.02429e-06	cDCa
HIST1H3A	2.97272e-10	-0.143101	0	0.077	5.19214e-06	cDCa
EGR3	2.97272e-10	-0.143101	0	0.077	5.19214e-06	cDCa
GOT1	2.97272e-10	-0.143101	0	0.077	5.19214e-06	cDCa
KRT86	2.97272e-10	-0.143101	0	0.077	5.19214e-06	cDCa
APOBEC3G	3.12348e-10	-0.405189	0.046	0.462	5.45548e-06	cDCa
POLR2K	4.92484e-10	-0.554981	0.052	0.462	8.60173e-06	cDCa
HSPB11	5.215e-10	-0.3654	0.048	0.462	9.10852e-06	cDCa
HIGD2A	5.64744e-10	-0.759911	0.122	0.692	9.86382e-06	cDCa
FEN1	6.5112e-10	-0.203786	0.004	0.154	1.13725e-05	cDCa
FAH	6.5112e-10	-0.203786	0.004	0.154	1.13725e-05	cDCa
GRK6	6.82526e-10	-0.302521	0.021	0.308	1.1921e-05	cDCa
LANCL1	7.03305e-10	-0.139247	0.004	0.154	1.22839e-05	cDCa
SAMD3	7.03305e-10	-0.139247	0.004	0.154	1.22839e-05	cDCa
GPR174	7.03305e-10	-0.139247	0.004	0.154	1.22839e-05	cDCa
ZNF408	7.03305e-10	-0.139247	0.004	0.154	1.22839e-05	cDCa
AATF	7.03305e-10	-0.139247	0.004	0.154	1.22839e-05	cDCa
DUSP4	7.03501e-10	-0.201865	0.004	0.154	1.22874e-05	cDCa
AMPH	7.5988e-10	-0.135408	0.004	0.154	1.32721e-05	cDCa
SEC23B	7.5988e-10	-0.137326	0.004	0.154	1.32721e-05	cDCa
XAB2	7.5988e-10	-0.137326	0.004	0.154	1.32721e-05	cDCa
LINC01684	7.5988e-10	-0.137326	0.004	0.154	1.32721e-05	cDCa
TESC	7.5988e-10	-0.199947	0.004	0.154	1.32721e-05	cDCa
AC124319.2	8.20799e-10	-0.12398	0.004	0.154	1.43361e-05	cDCa
TMEM183A	8.87948e-10	-0.295002	0.021	0.308	1.55089e-05	cDCa
RDH11	1.08384e-09	-0.239718	0.021	0.308	1.89304e-05	cDCa
USP16	1.19081e-09	-0.464334	0.052	0.462	2.07988e-05	cDCa
EEF2	1.31617e-09	-0.929158	0.263	0.923	2.29883e-05	cDCa
PPP2CA	1.37695e-09	-0.234105	0.021	0.308	2.40498e-05	cDCa
CCR7	1.49224e-09	-0.310096	0.012	0.231	2.60634e-05	cDCa
DALRD3	1.56793e-09	-0.196123	0.012	0.231	2.73855e-05	cDCa
LDLRAP1	1.56984e-09	-0.252938	0.012	0.231	2.74188e-05	cDCa
LINC00847	1.56984e-09	-0.252938	0.012	0.231	2.74188e-05	cDCa
CD2	1.58982e-09	-0.751814	0.097	0.615	2.77677e-05	cDCa
INTS11	1.82674e-09	-0.192313	0.012	0.231	3.19059e-05	cDCa
HARS	1.82674e-09	-0.192313	0.012	0.231	3.19059e-05	cDCa
CPSF7	1.82674e-09	-0.192313	0.012	0.231	3.19059e-05	cDCa
APOBEC3H	1.82674e-09	-0.192313	0.012	0.231	3.19059e-05	cDCa
GIMAP7	1.87021e-09	-0.861665	0.095	0.615	3.26651e-05	cDCa
KAT5	1.97091e-09	-0.190414	0.012	0.231	3.44239e-05	cDCa
ADH5	1.971e-09	-0.188518	0.012	0.231	3.44255e-05	cDCa
FBL	2.59268e-09	-0.451709	0.054	0.462	4.52837e-05	cDCa
HNRNPH3	2.7024e-09	-0.347198	0.023	0.308	4.72002e-05	cDCa
TUSC2	2.80107e-09	-0.300636	0.023	0.308	4.89236e-05	cDCa
ATXN10	5.10797e-09	-0.234105	0.023	0.308	8.92158e-05	cDCa
ZMYM2	5.20701e-09	-0.272779	0.037	0.385	9.09456e-05	cDCa
IL2RG	5.23019e-09	-0.335122	0.052	0.462	9.13505e-05	cDCa
MRPS6	9.10365e-09	-0.506972	0.041	0.385	0.000159004	cDCa
SF3B6	9.32372e-09	-0.663698	0.062	0.462	0.000162848	cDCa
HNRNPF	9.84129e-09	-0.459506	0.097	0.615	0.000171888	cDCa
ITM2A	1.01148e-08	-0.364164	0.014	0.231	0.000176666	cDCa
CD3E	1.10452e-08	-0.351037	0.056	0.462	0.000192916	cDCa
EIF4A2	1.17745e-08	-0.481264	0.079	0.538	0.000205653	cDCa
ELOF1	1.22567e-08	-0.241596	0.025	0.308	0.000214076	cDCa
TALDO1	1.29155e-08	-0.473131	0.058	0.462	0.000225582	cDCa
RBMX2	1.30014e-08	-0.251039	0.014	0.231	0.000227083	cDCa
GLRX3	1.31607e-08	-0.239718	0.025	0.308	0.000229864	cDCa
MRPL44	1.39212e-08	-0.249143	0.014	0.231	0.000243147	cDCa
DDX23	1.4228e-08	-0.192313	0.014	0.231	0.000248505	cDCa
DDX55	1.42417e-08	-0.247251	0.014	0.231	0.000248746	cDCa
QRSL1	1.52354e-08	-0.190414	0.014	0.231	0.000266102	cDCa
LTV1	1.52354e-08	-0.190414	0.014	0.231	0.000266102	cDCa
NIFK	1.62674e-08	-0.232241	0.025	0.308	0.000284126	cDCa
EIF3H	1.74245e-08	-0.686073	0.108	0.615	0.000304336	cDCa
FTSJ3	1.74561e-08	-0.186626	0.014	0.231	0.000304889	cDCa
SKP1	1.78385e-08	-0.492083	0.102	0.615	0.000311567	cDCa
PRCC	1.87138e-08	-0.22482	0.025	0.308	0.000326855	cDCa
GMFG	2.19099e-08	-0.676871	0.141	0.692	0.000382678	cDCa
BUB3	2.20488e-08	-0.31773	0.041	0.385	0.000385105	cDCa
SIGIRR	2.53495e-08	-0.267299	0.041	0.385	0.000442754	cDCa
TRBC2	2.65147e-08	-0.593983	0.085	0.538	0.000463105	cDCa
OPTN	2.96013e-08	-0.296876	0.027	0.308	0.000517016	cDCa
C1D	3.0685e-08	-0.343467	0.027	0.308	0.000535943	cDCa
PPP1CA	3.07923e-08	-0.556513	0.064	0.462	0.000537819	cDCa
BTG2	3.93531e-08	-0.287539	0.027	0.308	0.000687341	cDCa
TNFRSF18	4.63047e-08	-0.201865	0.006	0.154	0.000808759	cDCa
GZMH	4.77606e-08	-0.260572	0.006	0.154	0.000834186	cDCa
EIPR1	5.07753e-08	-0.137326	0.006	0.154	0.000886841	cDCa
POMC	5.07753e-08	-0.137326	0.006	0.154	0.000886841	cDCa
SCAP	5.07753e-08	-0.137326	0.006	0.154	0.000886841	cDCa
JAKMIP1	5.07753e-08	-0.137326	0.006	0.154	0.000886841	cDCa
SLC25A4	5.07753e-08	-0.137326	0.006	0.154	0.000886841	cDCa
BRWD3	5.07753e-08	-0.137326	0.006	0.154	0.000886841	cDCa
HMGB3	5.07753e-08	-0.137326	0.006	0.154	0.000886841	cDCa
ABRAXAS2	5.07753e-08	-0.137326	0.006	0.154	0.000886841	cDCa
THOC6	5.07753e-08	-0.137326	0.006	0.154	0.000886841	cDCa
ABHD3	5.07753e-08	-0.137326	0.006	0.154	0.000886841	cDCa
TRMU	5.07753e-08	-0.137326	0.006	0.154	0.000886841	cDCa
DOK2	5.26845e-08	-0.457492	0.062	0.462	0.000920187	cDCa
ALG2	5.40049e-08	-0.131584	0.006	0.154	0.000943249	cDCa
TOE1	5.40049e-08	-0.135408	0.006	0.154	0.000943249	cDCa
KTI12	5.40049e-08	-0.135408	0.006	0.154	0.000943249	cDCa
ETAA1	5.40049e-08	-0.135408	0.006	0.154	0.000943249	cDCa
TEX261	5.40049e-08	-0.135408	0.006	0.154	0.000943249	cDCa
GTF3C3	5.40049e-08	-0.135408	0.006	0.154	0.000943249	cDCa
ATG4B	5.40049e-08	-0.135408	0.006	0.154	0.000943249	cDCa
RAB9A	5.40049e-08	-0.135408	0.006	0.154	0.000943249	cDCa
RAB34	5.40049e-08	-0.135408	0.006	0.154	0.000943249	cDCa
APBA3	5.40049e-08	-0.135408	0.006	0.154	0.000943249	cDCa
INAFM1	5.40049e-08	-0.135408	0.006	0.154	0.000943249	cDCa
HOXB2	5.74268e-08	-0.133495	0.006	0.154	0.00100302	cDCa
ZNF146	5.74268e-08	-0.133495	0.006	0.154	0.00100302	cDCa
ALG12	5.74268e-08	-0.133495	0.006	0.154	0.00100302	cDCa
U2AF1L5	5.74268e-08	-0.133495	0.006	0.154	0.00100302	cDCa
TMX2	5.7428e-08	-0.131584	0.006	0.154	0.00100304	cDCa
RARRES3	6.19058e-08	-0.672199	0.093	0.538	0.00108125	cDCa
NDUFB5	6.83656e-08	-0.325016	0.044	0.385	0.00119407	cDCa
HSPA8	6.90705e-08	-0.76212	0.228	0.846	0.00120639	cDCa
DENND2D	6.91799e-08	-0.251039	0.015	0.231	0.0012083	cDCa
CCL5	6.93837e-08	-0.955985	0.095	0.538	0.00121185	cDCa
SSBP1	7.30647e-08	-0.32319	0.044	0.385	0.00127615	cDCa
GZMA	7.33371e-08	-0.399827	0.044	0.385	0.00128091	cDCa
DLD	7.5176e-08	-0.302521	0.015	0.231	0.00131302	cDCa
IARS2	8.15381e-08	-0.184738	0.015	0.231	0.00142414	cDCa
MAD1L1	8.68507e-08	-0.337896	0.029	0.308	0.00151693	cDCa
ACO2	9.22823e-08	-0.186626	0.015	0.231	0.0016118	cDCa
IST1	9.42098e-08	-0.241596	0.015	0.231	0.00164547	cDCa
MCM3	9.84293e-08	-0.337896	0.029	0.308	0.00171917	cDCa
MRPS25	1.04347e-07	-0.182853	0.015	0.231	0.00182252	cDCa
HPCAL1	1.04357e-07	-0.180971	0.015	0.231	0.00182269	cDCa
HNRNPA2B1	1.06669e-07	-0.764257	0.154	0.692	0.00186308	cDCa
CCDC85B	1.07027e-07	-0.56178	0.069	0.462	0.00186933	cDCa
OAZ1	1.2355e-07	-0.498991	0.896	1	0.00215792	cDCa
CD52	1.63843e-07	-0.746452	0.801	0.923	0.00286168	cDCa
TMSB4X	1.8022e-07	-1.32218	1	1	0.00314772	cDCa
ATP5MG	1.99083e-07	-0.630528	0.853	1	0.00347718	cDCa
SS18L2	2.55092e-07	-0.31773	0.048	0.385	0.00445544	cDCa
PRELID1	2.73856e-07	-0.537894	0.097	0.538	0.00478317	cDCa
LAT	2.88894e-07	-0.383912	0.069	0.462	0.00504582	cDCa
APRT	2.90069e-07	-0.579479	0.131	0.615	0.00506635	cDCa
EEF1E1	3.13331e-07	-0.247251	0.017	0.231	0.00547264	cDCa
WDR46	3.31087e-07	-0.190414	0.017	0.231	0.00578277	cDCa
GTF2E2	3.31087e-07	-0.190414	0.017	0.231	0.00578277	cDCa
IPCEF1	3.70896e-07	-0.186626	0.017	0.231	0.00647807	cDCa
UBE2N	3.76387e-07	-0.567404	0.097	0.538	0.00657397	cDCa
HDDC2	3.78423e-07	-0.337896	0.033	0.308	0.00660953	cDCa
EXOSC9	3.92437e-07	-0.184738	0.017	0.231	0.00685431	cDCa
CHCHD7	3.92437e-07	-0.184738	0.017	0.231	0.00685431	cDCa
FYN	4.00621e-07	-0.301528	0.048	0.385	0.00699724	cDCa
GHITM	4.01524e-07	-0.383649	0.033	0.308	0.00701302	cDCa
PAIP1	4.15162e-07	-0.180971	0.017	0.231	0.00725122	cDCa
XRCC5	4.23206e-07	-0.682421	0.073	0.462	0.00739171	cDCa
RGS14	4.39105e-07	-0.179093	0.017	0.231	0.0076694	cDCa
GZMM	5.32168e-07	-0.283829	0.033	0.308	0.00929485	cDCa
ANAPC16	5.34876e-07	-0.560461	0.129	0.615	0.00934214	cDCa
PSMD4	5.40875e-07	-0.37266	0.033	0.308	0.00944693	cDCa
HNRNPM	5.98385e-07	-0.431959	0.071	0.462	0.0104514	cDCa
EEF1A1	6.19042e-07	-0.911173	1	1	0.0108122	cDCa
OCIAD2	6.34445e-07	-0.376919	0.073	0.462	0.0110812	cDCa
MAD2L1	6.658e-07	-0.22482	0.033	0.308	0.0116289	cDCa
USP47	6.67152e-07	-0.276448	0.033	0.308	0.0116525	cDCa
PHF14	7.4518e-07	-0.22482	0.033	0.308	0.0130153	cDCa
EDF1	7.71059e-07	-0.651314	0.131	0.615	0.0134673	cDCa
SF1	7.94215e-07	-0.467891	0.077	0.462	0.0138718	cDCa
FH	8.28548e-07	-0.258658	0.008	0.154	0.0144714	cDCa
CD27	8.69118e-07	-0.452905	0.019	0.231	0.01518	cDCa
ATP2B1-AS1	8.942e-07	-0.135408	0.008	0.154	0.0156181	cDCa
ACP5	8.942e-07	-0.135408	0.008	0.154	0.0156181	cDCa
ISOC2	8.942e-07	-0.135408	0.008	0.154	0.0156181	cDCa
PRDX1	9.25486e-07	-0.528025	0.056	0.385	0.0161645	cDCa
BTBD1	9.41167e-07	-0.131584	0.008	0.154	0.0164384	cDCa
YY1AP1	9.41167e-07	-0.133495	0.008	0.154	0.0164384	cDCa
TCP11L1	9.41167e-07	-0.133495	0.008	0.154	0.0164384	cDCa
PANX1	9.41167e-07	-0.133495	0.008	0.154	0.0164384	cDCa
KBTBD3	9.41167e-07	-0.133495	0.008	0.154	0.0164384	cDCa
AC009061.2	9.41167e-07	-0.133495	0.008	0.154	0.0164384	cDCa
GNGT2	9.41167e-07	-0.133495	0.008	0.154	0.0164384	cDCa
ZNF83	9.41167e-07	-0.133495	0.008	0.154	0.0164384	cDCa
CD3D	9.89167e-07	-0.587511	0.104	0.538	0.0172768	cDCa
MRPS30	9.90415e-07	-0.131584	0.008	0.154	0.0172986	cDCa
TRAF7	9.90415e-07	-0.131584	0.008	0.154	0.0172986	cDCa
SLC37A1	9.90415e-07	-0.131584	0.008	0.154	0.0172986	cDCa
BLMH	9.90429e-07	-0.129678	0.008	0.154	0.0172988	cDCa
AC004585.1	9.90429e-07	-0.129678	0.008	0.154	0.0172988	cDCa
LSM1	9.91436e-07	-0.339749	0.035	0.308	0.0173164	cDCa
RFT1	1.04205e-06	-0.129678	0.008	0.154	0.0182004	cDCa
METAP1	1.04205e-06	-0.129678	0.008	0.154	0.0182004	cDCa
BRK1	1.07847e-06	-0.464485	0.104	0.538	0.0188365	cDCa
PIN4	1.14542e-06	-0.188518	0.019	0.231	0.0200059	cDCa
ECH1	1.14731e-06	-0.241596	0.019	0.231	0.0200389	cDCa
PEX16	1.27157e-06	-0.184738	0.019	0.231	0.0222092	cDCa
ANXA6	1.295e-06	-0.235972	0.019	0.231	0.0226185	cDCa
LYRM7	1.33937e-06	-0.182853	0.019	0.231	0.0233935	cDCa
FLOT2	1.33937e-06	-0.182853	0.019	0.231	0.0233935	cDCa
SNRPD1	1.39592e-06	-0.583549	0.089	0.462	0.0243812	cDCa
ALDH7A1	1.41052e-06	-0.180971	0.019	0.231	0.0246361	cDCa
RAD51C	1.41052e-06	-0.180971	0.019	0.231	0.0246361	cDCa
FIS1	1.4253e-06	-0.363593	0.056	0.385	0.0248943	cDCa
AC020656.1	1.46296e-06	3.68685	0.776	0	0.025552	cDCa
RHOT2	1.48516e-06	-0.179093	0.019	0.231	0.0259398	cDCa
KPNA2	1.48526e-06	-0.177219	0.019	0.231	0.0259416	cDCa
MDH1	1.48531e-06	-0.175348	0.019	0.231	0.0259424	cDCa
LCK	1.52082e-06	-0.389189	0.037	0.308	0.0265626	cDCa
HNRNPK	1.59787e-06	-0.578431	0.137	0.615	0.0279084	cDCa
POLE4	1.82429e-06	-0.375178	0.079	0.462	0.031863	cDCa
B4GALT1	1.84696e-06	1.75806	0.766	0	0.0322591	cDCa
MRPL36	1.91642e-06	-0.285682	0.037	0.308	0.0334722	cDCa
PTRHD1	2.12646e-06	-0.281978	0.037	0.308	0.0371407	cDCa
PPIG	2.20266e-06	-0.310857	0.075	0.462	0.0384716	cDCa
PFN1	2.22402e-06	-0.735402	0.954	1	0.0388447	cDCa
GSTO1	2.28688e-06	-0.3069	0.056	0.385	0.0399426	cDCa
PSMC2	2.49587e-06	-0.451027	0.021	0.231	0.0435929	cDCa
PSMB2	2.51544e-06	-0.321366	0.037	0.308	0.0439347	cDCa
CORO1A	2.51755e-06	-1.29788	0.23	0.692	0.0439716	cDCa
TRBC1	2.75309e-06	-0.855279	0.062	0.385	0.0480855	cDCa
SUPT16H	2.78401e-06	-0.270949	0.037	0.308	0.0486256	cDCa
PRKCH	2.78984e-06	-0.247251	0.021	0.231	0.0487274	cDCa
MRPL14	2.85024e-06	-0.22113	0.037	0.308	0.0497822	cDCa
CALHM6	6.45027e-28	-0.982982	0.177	0.604	1.1266e-23	cDCb
SOCS1	1.75484e-27	-0.397986	0.035	0.344	3.06501e-23	cDCb
B2M	2.42748e-25	-0.597749	0.998	0.99	4.23983e-21	cDCb
GAPDH	3.46589e-21	-0.580517	0.969	0.99	6.05352e-17	cDCb
AC020656.1	1.08087e-20	2.51798	0.596	0.062	1.88784e-16	cDCb
BRI3	1.39076e-20	-0.618326	0.17	0.542	2.42909e-16	cDCb
TYMP	1.6115e-20	-0.844091	0.472	0.792	2.81464e-16	cDCb
HLA-DRB1	5.59447e-19	-1.03845	0.833	0.948	9.7713e-15	cDCb
CHCHD10	8.87723e-19	-0.305961	0.049	0.312	1.5505e-14	cDCb
GABARAP	9.24459e-19	-0.537234	0.167	0.521	1.61466e-14	cDCb
ANXA1	1.85471e-18	-0.43452	0.236	0.646	3.23944e-14	cDCb
C4orf48	2.10218e-18	-0.319075	0.113	0.458	3.67167e-14	cDCb
CDC42	2.52692e-18	1.73678	0.71	0.292	4.41353e-14	cDCb
ALDOA	5.98265e-18	-0.264	0.069	0.365	1.04493e-13	cDCb
NME2	1.11694e-17	-0.249441	0.031	0.25	1.95085e-13	cDCb
RGS2	2.16592e-17	-0.29267	0.039	0.271	3.783e-13	cDCb
JUNB	2.50418e-17	-0.546544	0.276	0.656	4.37381e-13	cDCb
ATP5F1D	5.51361e-17	-0.329479	0.117	0.448	9.63007e-13	cDCb
IFITM1	6.27891e-17	-0.888317	0.167	0.479	1.09667e-12	cDCb
PSMB10	2.6913e-16	-0.28196	0.103	0.417	4.70063e-12	cDCb
ZFP36	3.6938e-16	-0.478903	0.233	0.604	6.45159e-12	cDCb
UBC	8.80746e-16	-0.421896	0.29	0.688	1.53831e-11	cDCb
VIM	1.00004e-15	-0.6075	0.88	0.938	1.74666e-11	cDCb
HBB	4.68356e-15	-2.67055	0	0.094	8.18031e-11	cDCb
FPR1	4.70371e-15	-0.341166	0.238	0.615	8.2155e-11	cDCb
CAPZA1	1.08933e-14	1.02509	0.627	0.229	1.90262e-10	cDCb
ANXA2	1.25147e-14	-0.373247	0.31	0.708	2.18582e-10	cDCb
CAPG	1.4949e-14	-0.280161	0.074	0.333	2.61099e-10	cDCb
FCGR1A	2.22537e-14	-0.373751	0.312	0.688	3.88683e-10	cDCb
ENO1	3.08816e-14	-0.472202	0.438	0.771	5.39378e-10	cDCb
SERPINA1	4.24675e-14	-0.481553	0.285	0.646	7.41737e-10	cDCb
MALAT1	5.21054e-14	-0.494295	0.998	0.979	9.10074e-10	cDCb
H3F3B	1.01478e-13	-0.368643	0.914	1	1.77241e-09	cDCb
PAM16	1.43227e-13	-0.103862	0.005	0.115	2.5016e-09	cDCb
LGALS3	1.72798e-13	-0.295918	0.086	0.344	3.01809e-09	cDCb
CEBPD	2.33884e-13	-0.558705	0.284	0.615	4.08502e-09	cDCb
PPP1CB	2.34584e-13	1.06158	0.511	0.125	4.09725e-09	cDCb
LAPTM5	5.0008e-13	-0.389825	0.63	0.865	8.73441e-09	cDCb
CYBA	5.49138e-13	-0.429454	0.883	0.958	9.59125e-09	cDCb
HNRNPH1	6.28749e-13	1.24103	0.448	0.062	1.09817e-08	cDCb
CHPT1	8.43386e-13	-0.244125	0.065	0.292	1.47306e-08	cDCb
IGFLR1	8.8423e-13	-0.201913	0.063	0.292	1.5444e-08	cDCb
CTSL	9.22982e-13	-0.30443	0.062	0.281	1.61208e-08	cDCb
ARF1	9.23164e-13	-0.290154	0.202	0.531	1.6124e-08	cDCb
CD68	9.48575e-13	-0.331816	0.225	0.562	1.65678e-08	cDCb
FOS	9.77221e-13	-0.81093	0.302	0.646	1.70681e-08	cDCb
GBP2	1.10102e-12	-0.397047	0.222	0.531	1.92305e-08	cDCb
CEBPB	1.83294e-12	-0.479532	0.233	0.531	3.20142e-08	cDCb
APOL4	1.90534e-12	-0.171544	0.051	0.26	3.32787e-08	cDCb
PKM	2.32133e-12	-0.364886	0.36	0.708	4.05444e-08	cDCb
AOAH	3.15129e-12	-0.19062	0.037	0.219	5.50404e-08	cDCb
MYL6	3.43611e-12	-0.34877	0.861	0.979	6.0015e-08	cDCb
PSMB9	3.49833e-12	-0.425973	0.309	0.635	6.11019e-08	cDCb
DUSP1	3.94389e-12	-0.37081	0.16	0.448	6.88839e-08	cDCb
HLA-B	4.4914e-12	-0.335098	0.963	0.99	7.84468e-08	cDCb
VDAC2	5.09311e-12	-0.285349	0.145	0.427	8.89562e-08	cDCb
CPVL	5.17964e-12	-0.4274	0.093	0.333	9.04676e-08	cDCb
HBA2	5.19192e-12	-1.12263	0	0.073	9.0682e-08	cDCb
B4GALT1	5.54913e-12	0.966014	0.415	0.052	9.6921e-08	cDCb
GSTP1	5.75276e-12	-0.417773	0.349	0.677	1.00478e-07	cDCb
POLD4	5.97085e-12	-0.16108	0.042	0.229	1.04287e-07	cDCb
SAMSN1	7.45975e-12	-0.296139	0.14	0.417	1.30292e-07	cDCb
UBB	7.9641e-12	-0.425931	0.177	0.469	1.39101e-07	cDCb
RNF145	9.39888e-12	-0.219252	0.088	0.333	1.64161e-07	cDCb
EEF1A1	1.12249e-11	-0.381887	1	0.99	1.96054e-07	cDCb
HLA-C	1.45707e-11	-0.296113	0.872	0.969	2.54491e-07	cDCb
IDO1	1.47786e-11	-0.209898	0.04	0.219	2.58124e-07	cDCb
C8orf82	1.6865e-11	-0.100794	0.008	0.115	2.94564e-07	cDCb
TMBIM6	2.31995e-11	-0.281494	0.29	0.635	4.05202e-07	cDCb
NBEAL1	2.36555e-11	0.461635	0.39	0.042	4.13167e-07	cDCb
PGK1	2.41319e-11	-0.369097	0.383	0.729	4.21487e-07	cDCb
CD74	4.02917e-11	-0.498569	0.983	0.99	7.03736e-07	cDCb
RNH1	4.92128e-11	-0.257045	0.16	0.448	8.5955e-07	cDCb
PDIA3	6.82456e-11	-0.26514	0.219	0.531	1.19198e-06	cDCb
ATP5F1B	9.4265e-11	-0.273076	0.137	0.396	1.64643e-06	cDCb
COPE	9.56366e-11	-0.300105	0.205	0.49	1.67039e-06	cDCb
EIF1	1.33045e-10	-0.344096	0.969	0.99	2.32377e-06	cDCb
CTSS	1.34946e-10	-0.484052	0.627	0.875	2.35697e-06	cDCb
AC103591.3	1.8781e-10	-0.123862	0.012	0.125	3.28029e-06	cDCb
FCGR2B	1.96827e-10	-0.423428	0.19	0.448	3.43778e-06	cDCb
SPI1	2.17523e-10	-0.320307	0.244	0.531	3.79926e-06	cDCb
ALDH2	3.45091e-10	-0.257203	0.147	0.406	6.02737e-06	cDCb
JUN	4.21354e-10	-0.258245	0.034	0.188	7.35937e-06	cDCb
PPDPF	4.28889e-10	-0.4249	0.495	0.719	7.49098e-06	cDCb
HEBP2	4.66772e-10	-0.163636	0.051	0.229	8.15265e-06	cDCb
IL1R2	5.44089e-10	-0.498786	0.204	0.469	9.50307e-06	cDCb
PGAM1	7.74158e-10	-0.285576	0.231	0.521	1.35214e-05	cDCb
CCDC69	7.77598e-10	-0.169778	0.08	0.292	1.35815e-05	cDCb
APLP2	9.68135e-10	-0.332716	0.269	0.552	1.69095e-05	cDCb
S100A6	1.00188e-09	-0.406204	0.941	0.958	1.74988e-05	cDCb
HIF1A-AS2	1.15732e-09	-0.207685	0.059	0.24	2.02137e-05	cDCb
MXI1	1.194e-09	-0.206216	0.073	0.271	2.08544e-05	cDCb
ADAM28	1.33762e-09	-0.296191	0.151	0.396	2.33629e-05	cDCb
SOCS3	1.34545e-09	-0.355	0.133	0.365	2.34996e-05	cDCb
GRN	1.45704e-09	-0.360123	0.336	0.625	2.54486e-05	cDCb
PSAP	1.5627e-09	-0.382038	0.509	0.833	2.72941e-05	cDCb
HK2	1.72327e-09	-0.36198	0.127	0.354	3.00986e-05	cDCb
RNF187	2.04327e-09	-0.148154	0.045	0.208	3.56877e-05	cDCb
C1orf56	2.15772e-09	0.68878	0.333	0.031	3.76867e-05	cDCb
OGFR	2.24053e-09	-0.186776	0.096	0.312	3.91331e-05	cDCb
VSIG4	2.25262e-09	-0.421626	0.261	0.5	3.93443e-05	cDCb
PLEKHO1	2.35385e-09	-0.335271	0.259	0.542	4.11124e-05	cDCb
HLA-DRA	2.41787e-09	-0.448206	0.992	0.979	4.22306e-05	cDCb
S100A10	2.5303e-09	-0.419349	0.818	0.885	4.41942e-05	cDCb
PSMB3	2.83028e-09	-0.249993	0.15	0.396	4.94336e-05	cDCb
RHOG	4.77114e-09	-0.258432	0.352	0.667	8.33328e-05	cDCb
CD63	5.13371e-09	-0.358945	0.435	0.708	8.96654e-05	cDCb
FCGRT	6.27547e-09	-0.251015	0.242	0.521	0.000109607	cDCb
CTSZ	6.46354e-09	-0.379888	0.287	0.542	0.000112892	cDCb
IFI30	8.0091e-09	-0.424157	0.267	0.51	0.000139887	cDCb
TPI1	8.34702e-09	-0.380981	0.534	0.75	0.000145789	cDCb
ANPEP	1.09134e-08	-0.13414	0.028	0.156	0.000190614	cDCb
ITGB2	1.14473e-08	-0.356607	0.412	0.688	0.000199938	cDCb
BTN3A2	1.14521e-08	-0.136803	0.035	0.177	0.000200022	cDCb
RAC1	1.32483e-08	-0.408738	0.296	0.531	0.000231394	cDCb
ATP6V0B	1.59642e-08	-0.248689	0.272	0.552	0.000278831	cDCb
MGST3	1.60488e-08	-0.217299	0.142	0.375	0.000280309	cDCb
XIST	1.63479e-08	-0.189425	0.125	0.354	0.000285532	cDCb
UPP1	1.64749e-08	-0.209193	0.187	0.448	0.00028775	cDCb
PILRA	1.77694e-08	-0.176343	0.093	0.292	0.000310361	cDCb
CD53	2.15405e-08	-0.23407	0.279	0.562	0.000376226	cDCb
TLR2	2.19315e-08	-0.214947	0.176	0.427	0.000383055	cDCb
NBPF19	2.25232e-08	-0.13957	0.051	0.208	0.000393391	cDCb
HLA-DPA1	2.28918e-08	-0.500731	0.85	0.979	0.000399828	cDCb
FLOT1	2.63123e-08	-0.1881	0.14	0.375	0.00045957	cDCb
EVI2A	2.7035e-08	-0.272465	0.202	0.448	0.000472194	cDCb
LRRC25	2.73576e-08	-0.200542	0.085	0.271	0.000477827	cDCb
S100A11	2.77055e-08	-0.312961	0.935	0.979	0.000483904	cDCb
FCGR2A	3.13047e-08	-0.288346	0.323	0.594	0.000546768	cDCb
STAT2	3.14833e-08	0.673556	0.366	0.094	0.000549888	cDCb
EVI2B	3.70052e-08	-0.303371	0.304	0.562	0.000646333	cDCb
PSME2	3.95676e-08	-0.314824	0.418	0.698	0.000691088	cDCb
C3AR1	4.51677e-08	-0.221211	0.105	0.302	0.000788899	cDCb
DPP7	4.91463e-08	-0.16738	0.085	0.271	0.000858389	cDCb
IER2	5.24204e-08	-0.370527	0.261	0.521	0.000915575	cDCb
LY86	6.74353e-08	-0.253524	0.185	0.417	0.00117783	cDCb
BTG1	7.75071e-08	-0.236972	0.284	0.552	0.00135374	cDCb
CALCOCO2	8.74756e-08	-0.23598	0.181	0.417	0.00152785	cDCb
BRD7	8.77664e-08	-0.136475	0.054	0.208	0.00153293	cDCb
HLA-A	9.01514e-08	-0.332306	0.742	0.917	0.00157458	cDCb
ATP5F1C	9.63924e-08	-0.206703	0.185	0.427	0.00168359	cDCb
ERP29	1.08009e-07	-0.25068	0.187	0.417	0.00188649	cDCb
SLC16A3	1.20536e-07	-0.265703	0.235	0.469	0.00210528	cDCb
TALDO1	1.22981e-07	-0.222873	0.113	0.312	0.00214799	cDCb
SRSF9	1.31792e-07	-0.186776	0.139	0.354	0.00230187	cDCb
PYCARD	1.33947e-07	-0.275529	0.438	0.719	0.00233952	cDCb
TUBB	1.39889e-07	-0.27131	0.285	0.552	0.0024433	cDCb
IFITM3	1.42194e-07	-0.428641	0.688	0.896	0.00248356	cDCb
SDCBP	1.70352e-07	-0.290951	0.269	0.521	0.00297537	cDCb
SLC25A6	1.90765e-07	-0.279864	0.813	0.906	0.0033319	cDCb
PSMC3	1.9554e-07	-0.137928	0.057	0.208	0.0034153	cDCb
HNRNPA2B1	2.05298e-07	-0.265236	0.343	0.615	0.00358573	cDCb
SAP30	2.0802e-07	-0.257203	0.14	0.344	0.00363328	cDCb
ARPC1B	2.10544e-07	-0.276927	0.619	0.865	0.00367736	cDCb
EIF4A3	2.13428e-07	-0.123753	0.029	0.146	0.00372774	cDCb
HLX	2.3785e-07	-0.120764	0.029	0.146	0.00415428	cDCb
ACTB	2.5132e-07	-0.242133	1	1	0.00438955	cDCb
OGFRL1	2.54019e-07	-0.17896	0.128	0.333	0.0044367	cDCb
CFL1	2.58729e-07	-0.203833	0.89	0.948	0.00451896	cDCb
ASCL2	2.60093e-07	-0.104239	0.029	0.146	0.00454279	cDCb
VSIR	2.7022e-07	-0.270777	0.276	0.521	0.00471966	cDCb
GBP5	2.77482e-07	-0.375719	0.219	0.448	0.0048465	cDCb
ABHD12	2.83673e-07	-0.1237	0.039	0.167	0.00495463	cDCb
BCL2A1	2.84971e-07	-0.180539	0.14	0.354	0.00497731	cDCb
HAPLN3	2.94653e-07	-0.126594	0.043	0.177	0.00514641	cDCb
NDUFS7	3.08881e-07	-0.18933	0.185	0.417	0.00539492	cDCb
MCL1	3.09916e-07	-0.249296	0.265	0.51	0.00541299	cDCb
NCF2	3.12926e-07	-0.233954	0.219	0.448	0.00546557	cDCb
CALM2	3.1582e-07	-0.287284	0.656	0.792	0.00551612	cDCb
TXN	3.20166e-07	-0.311939	0.301	0.531	0.00559202	cDCb
CSTA	3.25472e-07	-0.251089	0.412	0.698	0.00568469	cDCb
FRG1	3.34596e-07	-0.14935	0.054	0.198	0.00584406	cDCb
CD86	3.45523e-07	-0.178333	0.165	0.385	0.0060349	cDCb
ACAA1	3.57224e-07	-0.150573	0.103	0.292	0.00623928	cDCb
LGALS1	3.60729e-07	-0.335144	0.88	0.885	0.00630049	cDCb
ALOX15B	3.69727e-07	-0.162171	0.049	0.188	0.00645766	cDCb
ACTG1	3.7781e-07	-0.237601	0.79	0.906	0.00659883	cDCb
FCGR1B	4.19165e-07	-0.249696	0.167	0.375	0.00732113	cDCb
TGFBI	4.42155e-07	-0.247223	0.184	0.406	0.00772268	cDCb
UBAC2	5.01237e-07	-0.126517	0.049	0.188	0.00875461	cDCb
HMGN2	5.2909e-07	-0.283489	0.34	0.594	0.00924109	cDCb
BLVRB	5.43521e-07	-0.250062	0.193	0.417	0.00949314	cDCb
MGAT1	5.60787e-07	-0.203599	0.225	0.469	0.00979471	cDCb
TAF10	5.69161e-07	-0.108814	0.035	0.156	0.00994096	cDCb
FN1	5.71447e-07	-0.141881	0.012	0.094	0.00998089	cDCb
RAB7A	5.98872e-07	-0.192418	0.215	0.448	0.0104599	cDCb
HLA-DPB1	6.99604e-07	-0.439042	0.89	0.969	0.0122193	cDCb
C6orf62	7.56019e-07	0.46158	0.42	0.167	0.0132046	cDCb
CHMP4B	7.64082e-07	-0.177619	0.13	0.323	0.0133454	cDCb
CLEC2B	7.66615e-07	-0.245968	0.191	0.406	0.0133897	cDCb
CTSA	8.55604e-07	-0.175847	0.116	0.302	0.014944	cDCb
COX6A1	8.71489e-07	-0.221655	0.341	0.604	0.0152214	cDCb
ABI3	9.43433e-07	-0.152499	0.114	0.302	0.016478	cDCb
CAPZB	9.652e-07	-0.188349	0.267	0.521	0.0168582	cDCb
CREG1	1.01489e-06	-0.178164	0.097	0.271	0.0177261	cDCb
NCF1	1.01607e-06	-0.204216	0.219	0.458	0.0177466	cDCb
ODF3B	1.02877e-06	-0.178486	0.144	0.344	0.0179685	cDCb
TKT	1.05715e-06	-0.239845	0.233	0.458	0.0184642	cDCb
PSME1	1.12841e-06	-0.230134	0.534	0.76	0.0197088	cDCb
NUBP1	1.17534e-06	-0.110435	0.046	0.177	0.0205285	cDCb
DNAJC15	1.22514e-06	-0.191001	0.202	0.427	0.0213984	cDCb
CNBP	1.22994e-06	-0.20299	0.228	0.458	0.0214821	cDCb
NDRG1	1.27706e-06	-0.163913	0.069	0.219	0.0223051	cDCb
ALOX5	1.27919e-06	-0.17233	0.15	0.354	0.0223424	cDCb
PRDX3	1.27932e-06	-0.162351	0.136	0.333	0.0223447	cDCb
EEF2	1.43476e-06	-0.26162	0.505	0.708	0.0250594	cDCb
THEMIS2	1.4525e-06	-0.162705	0.131	0.323	0.0253693	cDCb
ERGIC1	1.47828e-06	-0.119233	0.052	0.188	0.0258196	cDCb
RAB5C	1.49374e-06	-0.174509	0.15	0.354	0.0260896	cDCb
RHOA	1.56717e-06	-0.250247	0.491	0.719	0.0273721	cDCb
DYNLT1	1.59298e-06	-0.186123	0.316	0.573	0.027823	cDCb
MYO1G	1.7553e-06	-0.147135	0.088	0.25	0.0306581	cDCb
HEBP1	1.79177e-06	-0.111901	0.048	0.177	0.031295	cDCb
PTAFR	1.83997e-06	-0.140526	0.111	0.292	0.0321369	cDCb
APBB1IP	1.84787e-06	-0.147315	0.111	0.292	0.0322749	cDCb
VAMP8	1.85759e-06	-0.243261	0.685	0.927	0.0324446	cDCb
SLC39A4	1.87381e-06	-0.107327	0.039	0.156	0.032728	cDCb
BX284668.5	1.90015e-06	-0.102745	0.034	0.146	0.033188	cDCb
ARPC3	1.96057e-06	-0.2151	0.731	0.885	0.0342433	cDCb
TMA7	2.09275e-06	0.254275	0.83	0.604	0.036552	cDCb
IFITM2	2.18807e-06	-0.311468	0.789	0.823	0.0382169	cDCb
TAP1	2.3021e-06	-0.22638	0.177	0.375	0.0402085	cDCb
PDXK	2.35349e-06	-0.137255	0.088	0.25	0.0411061	cDCb
TMEM176A	2.35549e-06	-0.252343	0.106	0.271	0.041141	cDCb
ANXA4	2.46896e-06	-0.12798	0.049	0.177	0.0431229	cDCb
HMGA1	2.5733e-06	-0.155523	0.114	0.292	0.0449452	cDCb
MDM4	2.75072e-06	0.49519	0.324	0.104	0.0480441	cDCb
CDC42SE1	2.84759e-06	0.539109	0.34	0.115	0.049736	cDCb
UBD	3.21042e-13	-1.52905	0.045	1	5.60732e-09	matDC
XIST	1.20403e-10	-0.670674	0.023	0.824	2.10295e-06	matDC
RAC1	2.48778e-10	-1.1961	0.205	1	4.34516e-06	matDC
DUSP5	1.09678e-09	-1.13957	0.159	0.941	1.91563e-05	matDC
GABARAP	5.03798e-09	-0.677683	0.045	0.765	8.79933e-05	matDC
ACTG1	6.55444e-09	-1.37956	0.659	1	0.00011448	matDC
ATP5F1D	7.32417e-09	-0.578301	0.023	0.706	0.000127924	matDC
SOCS1	9.52256e-09	-0.789708	0.045	0.765	0.000166321	matDC
TYMP	1.04853e-08	-0.966725	0.318	1	0.000183136	matDC
NME2	3.98553e-08	-0.534082	0	0.588	0.000696113	matDC
CSF2RA	4.71336e-08	-0.972955	0.636	1	0.000823236	matDC
REPIN1	8.61724e-08	-0.637319	0.182	0.882	0.00150509	matDC
ENO1	1.03123e-07	-0.796826	0.25	0.941	0.00180114	matDC
ATF4	1.27572e-07	-0.740681	0.227	0.941	0.00222817	matDC
CRIP1	1.36881e-07	-1.38311	0.795	1	0.00239076	matDC
SYNGR2	1.72733e-07	-0.837032	0.341	0.941	0.00301695	matDC
VDAC1	1.90013e-07	-0.480973	0.091	0.765	0.00331876	matDC
RNF145	2.16324e-07	-0.835463	0.227	0.882	0.00377832	matDC
PPA1	2.46601e-07	-1.28214	0.841	0.941	0.00430714	matDC
BNIP3L	2.52784e-07	-0.574499	0.114	0.824	0.00441512	matDC
BCL7C	3.39593e-07	-0.476518	0.023	0.588	0.00593133	matDC
GAPDH	4.11404e-07	-0.830613	0.977	1	0.00718558	matDC
B2M	4.86523e-07	-0.515078	1	1	0.00849761	matDC
FNBP1	5.08917e-07	-0.831175	0.295	0.941	0.00888875	matDC
MALT1	5.33515e-07	-0.597336	0.045	0.647	0.00931837	matDC
LDHA	6.6236e-07	-0.812826	0.25	0.941	0.0115688	matDC
TPI1	9.96968e-07	-0.805264	0.227	0.882	0.0174131	matDC
ETV6	1.49481e-06	-0.537	0.136	0.824	0.0261083	matDC
BIRC3	1.81529e-06	-0.866669	0.909	1	0.0317058	matDC
PNRC1	1.9129e-06	-0.790634	0.568	1	0.0334107	matDC
GSTP1	2.06775e-06	-0.81464	0.682	0.941	0.0361152	matDC
CCNG1	2.13107e-06	-0.40241	0.023	0.529	0.0372212	matDC
CCL19	2.24161e-06	-1.1639	0.682	0.941	0.0391519	matDC
CALHM6	2.47998e-40	-0.849069	0.239	0.694	4.33153e-36	myeloid
HLA-B	3.20316e-33	-0.533762	0.962	1	5.59464e-29	myeloid
IL1R2	2.22452e-31	-0.576719	0.088	0.449	3.88534e-27	myeloid
CHCHD10	2.04918e-30	-0.306739	0.051	0.361	3.5791e-26	myeloid
B2M	5.21544e-28	-0.393133	1	1	9.10929e-24	myeloid
IFITM1	5.63748e-28	-0.574014	0.18	0.571	9.84642e-24	myeloid
TYMP	9.16812e-27	-0.807539	0.51	0.782	1.6013e-22	myeloid
C4orf48	1.47668e-26	-0.375198	0.156	0.537	2.57916e-22	myeloid
CD163	1.59944e-25	-0.857476	0.463	0.748	2.79358e-21	myeloid
VIM	1.71821e-23	-0.577218	0.763	0.946	3.00102e-19	myeloid
SAP30	3.70903e-23	-0.342486	0.115	0.442	6.47819e-19	myeloid
BRI3	4.91801e-23	-0.610596	0.208	0.544	8.5898e-19	myeloid
MALAT1	3.14862e-21	-0.482404	0.999	0.993	5.49938e-17	myeloid
HLA-C	3.54246e-21	-0.512416	0.784	0.912	6.18727e-17	myeloid
HLA-DRB1	1.20664e-20	-0.522794	0.72	0.946	2.10751e-16	myeloid
SOCS1	2.51462e-20	-0.265603	0.056	0.299	4.39204e-16	myeloid
HLA-A	4.5307e-20	-0.623251	0.697	0.898	7.91332e-16	myeloid
SIGLEC10	5.61363e-20	-0.254607	0.054	0.293	9.80477e-16	myeloid
RAC1	1.00094e-19	-0.51176	0.311	0.626	1.74824e-15	myeloid
UBC	5.74762e-19	-0.411116	0.264	0.619	1.00388e-14	myeloid
ATP5F1D	6.69866e-19	-0.308137	0.156	0.469	1.16999e-14	myeloid
TRAPPC5	3.09803e-18	-0.142785	0.012	0.156	5.41101e-14	myeloid
GAPDH	1.00503e-17	-0.431982	0.929	0.993	1.75538e-13	myeloid
GBP5	3.56309e-17	-0.496764	0.308	0.619	6.22329e-13	myeloid
GABARAP	1.00225e-16	-0.435992	0.306	0.605	1.75053e-12	myeloid
NME2	1.64148e-16	-0.185187	0.043	0.238	2.86701e-12	myeloid
EEF1G	2.14392e-16	-0.151097	0.024	0.184	3.74458e-12	myeloid
CTSL	2.92472e-16	-0.390488	0.129	0.395	5.10832e-12	myeloid
EHBP1L1	6.10214e-16	-0.196078	0.063	0.279	1.0658e-11	myeloid
FCGR1A	7.96423e-16	-0.39964	0.263	0.565	1.39103e-11	myeloid
SECTM1	1.65124e-15	-0.210279	0.081	0.313	2.88405e-11	myeloid
CEBPD	2.30553e-15	-0.470344	0.311	0.599	4.02684e-11	myeloid
PDXK	2.39498e-15	-0.225863	0.097	0.34	4.18308e-11	myeloid
IGFLR1	2.66736e-15	-0.213878	0.082	0.313	4.65881e-11	myeloid
IFI30	4.52181e-15	-0.494064	0.275	0.537	7.89779e-11	myeloid
FCGR1B	5.05697e-15	-0.302714	0.149	0.415	8.8325e-11	myeloid
AC020656.1	5.77856e-15	1.30291	0.407	0.075	1.00928e-10	myeloid
PSMB9	1.34393e-14	-0.367322	0.48	0.769	2.34731e-10	myeloid
CEBPB	1.8468e-14	-0.530784	0.426	0.673	3.22563e-10	myeloid
GBP2	1.96259e-14	-0.284283	0.258	0.578	3.42786e-10	myeloid
CHPT1	2.11274e-14	-0.182284	0.06	0.259	3.69011e-10	myeloid
RNASE1	2.33642e-14	-0.167331	0.017	0.15	4.08079e-10	myeloid
RGS1	3.67569e-14	-0.193788	0.012	0.129	6.41997e-10	myeloid
AC007952.4	3.94155e-14	-0.115865	0.012	0.129	6.88432e-10	myeloid
HLA-E	5.73976e-14	-0.298283	0.569	0.837	1.00251e-09	myeloid
LYL1	6.50204e-14	-0.155404	0.035	0.197	1.13565e-09	myeloid
GZMK	1.03381e-13	-0.465332	0.02	0.15	1.80566e-09	myeloid
CREG1	1.26153e-13	-0.217264	0.075	0.279	2.20339e-09	myeloid
LGALS3BP	1.92063e-13	-0.142196	0.031	0.184	3.35457e-09	myeloid
PPDPF	2.25777e-13	-0.318655	0.443	0.735	3.94343e-09	myeloid
ITM2C	3.14551e-13	-0.174021	0.012	0.122	5.49394e-09	myeloid
LYZ	3.27233e-13	0.762953	0.821	0.701	5.71545e-09	myeloid
CTSZ	5.77737e-13	-0.373841	0.32	0.592	1.00908e-08	myeloid
VSIG4	5.92396e-13	-0.297635	0.15	0.395	1.03468e-08	myeloid
CD27	9.85777e-13	-0.230615	0.017	0.136	1.72176e-08	myeloid
PSME1	1.52205e-12	-0.295915	0.506	0.776	2.65841e-08	myeloid
LGALS2	1.59328e-12	0.386294	0.31	0.027	2.78283e-08	myeloid
IFITM3	1.90969e-12	-0.558308	0.603	0.748	3.33547e-08	myeloid
TCN2	2.44562e-12	-0.181866	0.054	0.224	4.27152e-08	myeloid
STK17A	2.79393e-12	-0.217105	0.046	0.204	4.87988e-08	myeloid
PLEC	3.30651e-12	-0.188221	0.088	0.293	5.77515e-08	myeloid
DYNC1I2	4.91726e-12	-0.229923	0.169	0.422	8.58849e-08	myeloid
TUBB4B	4.91889e-12	-0.385843	0.078	0.265	8.59132e-08	myeloid
CCNB2	5.27269e-12	-0.217657	0.024	0.15	9.20928e-08	myeloid
PTPN6	5.9555e-12	-0.220442	0.129	0.361	1.04019e-07	myeloid
IGF2R	6.05451e-12	-0.15329	0.064	0.245	1.05748e-07	myeloid
APOL4	8.32254e-12	-0.132121	0.037	0.184	1.45361e-07	myeloid
CD46	8.5612e-12	-0.183106	0.09	0.293	1.4953e-07	myeloid
HSP90B1	9.34381e-12	-0.325957	0.367	0.633	1.63199e-07	myeloid
LAPTM5	9.92411e-12	-0.336448	0.608	0.81	1.73335e-07	myeloid
BTF3	1.04252e-11	0.349663	0.81	0.565	1.82087e-07	myeloid
CYBA	1.16383e-11	-0.354697	0.822	0.939	2.03275e-07	myeloid
ANXA6	1.19078e-11	-0.181886	0.06	0.231	2.07982e-07	myeloid
NBEAL1	1.60154e-11	0.348218	0.333	0.061	2.79726e-07	myeloid
DDRGK1	1.87366e-11	-0.128899	0.038	0.184	3.27254e-07	myeloid
ASCL2	1.96689e-11	-0.140931	0.033	0.17	3.43537e-07	myeloid
ITGB7	1.97668e-11	-0.117487	0.022	0.143	3.45246e-07	myeloid
FYB1	2.1393e-11	-0.299173	0.605	0.871	3.73649e-07	myeloid
ILF2	2.55624e-11	-0.205781	0.092	0.286	4.46473e-07	myeloid
TMBIM6	2.55855e-11	-0.275686	0.399	0.687	4.46876e-07	myeloid
MYL6	2.89617e-11	-0.299146	0.86	0.973	5.05846e-07	myeloid
LHFPL2	4.40242e-11	-0.182704	0.077	0.259	7.68928e-07	myeloid
UBE2S	4.514e-11	-0.309988	0.105	0.299	7.88415e-07	myeloid
FTH1	5.63303e-11	0.575968	0.996	1	9.83865e-07	myeloid
HEBP2	6.66597e-11	-0.161366	0.084	0.272	1.16428e-06	myeloid
PSMB10	8.03624e-11	-0.211117	0.175	0.415	1.40361e-06	myeloid
FGL2	9.92408e-11	-0.411569	0.522	0.714	1.73334e-06	myeloid
GNS	1.15878e-10	-0.243773	0.192	0.429	2.02393e-06	myeloid
RNF145	1.26336e-10	-0.198456	0.107	0.306	2.20658e-06	myeloid
SH3BGRL3	1.39701e-10	0.324126	0.986	0.986	2.44002e-06	myeloid
CFL1	1.60265e-10	-0.360779	0.884	0.946	2.7992e-06	myeloid
CMKLR1	1.98571e-10	-0.145366	0.046	0.19	3.46824e-06	myeloid
NUCB2	2.01971e-10	-0.192268	0.086	0.265	3.52762e-06	myeloid
RARRES3	2.19471e-10	-0.267705	0.315	0.578	3.83328e-06	myeloid
SERPINA1	2.28969e-10	-0.351785	0.4	0.633	3.99917e-06	myeloid
ERGIC1	2.29231e-10	-0.174552	0.107	0.306	4.00375e-06	myeloid
PDIA3	2.91464e-10	-0.302665	0.277	0.517	5.0907e-06	myeloid
CNIH4	3.11871e-10	-0.300492	0.248	0.483	5.44714e-06	myeloid
SCIMP	3.16666e-10	-0.212993	0.132	0.34	5.53088e-06	myeloid
FOS	3.64109e-10	-0.43376	0.379	0.626	6.35952e-06	myeloid
DUSP1	4.21375e-10	-0.364448	0.289	0.537	7.35974e-06	myeloid
OST4	4.2286e-10	0.305175	0.833	0.653	7.38567e-06	myeloid
LACTB	4.34409e-10	-0.174255	0.12	0.327	7.58738e-06	myeloid
IFI6	4.57988e-10	-0.32436	0.476	0.714	7.99922e-06	myeloid
AP2S1	5.28657e-10	-0.303423	0.459	0.707	9.23352e-06	myeloid
CDC20	5.38193e-10	-0.239982	0.025	0.136	9.40008e-06	myeloid
NMT1	5.47771e-10	-0.199867	0.105	0.293	9.56737e-06	myeloid
SERPING1	5.58951e-10	-0.285646	0.175	0.388	9.76265e-06	myeloid
APBB1IP	6.8215e-10	-0.17412	0.111	0.306	1.19144e-05	myeloid
CTSS	7.05845e-10	-0.396944	0.626	0.755	1.23283e-05	myeloid
GBP1	7.62446e-10	-0.359743	0.557	0.769	1.33169e-05	myeloid
PGP	7.78626e-10	-0.129981	0.027	0.143	1.35995e-05	myeloid
KIAA1551	8.03738e-10	-0.204175	0.149	0.361	1.40381e-05	myeloid
CTSD	8.35537e-10	-0.281941	0.305	0.565	1.45935e-05	myeloid
NENF	8.66184e-10	-0.125138	0.042	0.177	1.51288e-05	myeloid
IL10RB	8.73373e-10	-0.15395	0.059	0.211	1.52543e-05	myeloid
AC103591.3	8.91842e-10	-0.126698	0.025	0.136	1.55769e-05	myeloid
APLP2	1.02876e-09	-0.31052	0.371	0.612	1.79684e-05	myeloid
B3GNT2	1.12653e-09	-0.101753	0.025	0.136	1.9676e-05	myeloid
ANXA2	1.21773e-09	-0.214538	0.336	0.612	2.12688e-05	myeloid
CTSB	1.24881e-09	-0.513443	0.626	0.748	2.18117e-05	myeloid
ACTG1	1.33511e-09	-0.437921	0.834	0.898	2.33191e-05	myeloid
RHOU	1.43799e-09	-0.135316	0.043	0.177	2.51159e-05	myeloid
RAB13	1.52081e-09	-0.15497	0.071	0.231	2.65624e-05	myeloid
FAU	1.60634e-09	0.29994	0.99	0.946	2.80564e-05	myeloid
CDV3	1.80432e-09	-0.191936	0.145	0.354	3.15142e-05	myeloid
POLD4	2.19205e-09	-0.131031	0.054	0.197	3.82864e-05	myeloid
ENO1	2.89508e-09	-0.238456	0.557	0.816	5.05655e-05	myeloid
IL16	2.92478e-09	-0.112765	0.038	0.163	5.10843e-05	myeloid
STAB1	3.13491e-09	-0.154867	0.084	0.252	5.47543e-05	myeloid
RNASEK	3.13491e-09	-0.154867	0.084	0.252	5.47543e-05	myeloid
RAB11B	3.44701e-09	-0.139856	0.065	0.218	6.02054e-05	myeloid
SLC3A2	3.46e-09	-0.147189	0.065	0.218	6.04324e-05	myeloid
MAP3K7CL	3.81181e-09	-0.215442	0.152	0.361	6.65771e-05	myeloid
TACC3	4.00138e-09	-0.124393	0.033	0.15	6.98882e-05	myeloid
HSPA5	4.15245e-09	-0.309496	0.276	0.497	7.25267e-05	myeloid
GLUL	5.00111e-09	-0.440663	0.58	0.748	8.73494e-05	myeloid
SAE1	5.49586e-09	-0.102641	0.03	0.143	9.59906e-05	myeloid
IQGAP1	5.4963e-09	-0.223054	0.38	0.619	9.59984e-05	myeloid
TALDO1	6.31125e-09	-0.175102	0.133	0.327	0.000110232	myeloid
P4HB	6.42184e-09	-0.228058	0.242	0.469	0.000112164	myeloid
CYBB	6.64758e-09	-0.294898	0.523	0.735	0.000116107	myeloid
EEF1B2	7.01885e-09	0.313005	0.708	0.51	0.000122591	myeloid
WDR26	7.29674e-09	-0.161032	0.107	0.286	0.000127445	myeloid
UBB	7.90927e-09	-0.418292	0.218	0.422	0.000138143	myeloid
FAM173A	8.41055e-09	-0.111944	0.034	0.15	0.000146899	myeloid
CRELD2	9.1173e-09	-0.15312	0.084	0.245	0.000159243	myeloid
CALM3	9.59609e-09	-0.279326	0.386	0.592	0.000167605	myeloid
ELK3	9.75974e-09	-0.1362	0.068	0.218	0.000170464	myeloid
ATF4	1.13166e-08	-0.186362	0.173	0.381	0.000197656	myeloid
PFKL	1.24923e-08	-0.129105	0.082	0.245	0.000218191	myeloid
XIST	1.24991e-08	-0.175952	0.205	0.435	0.00021831	myeloid
SIGLEC1	1.31184e-08	-0.12823	0.068	0.218	0.000229127	myeloid
ALDOA	1.33901e-08	-0.164348	0.101	0.272	0.000233872	myeloid
PFDN5	1.35173e-08	0.280016	0.911	0.728	0.000236094	myeloid
MX2	1.45684e-08	-0.249414	0.193	0.395	0.000254452	myeloid
ARF1	1.50578e-08	-0.202524	0.273	0.503	0.000262999	myeloid
SART1	1.54777e-08	-0.110252	0.038	0.156	0.000270333	myeloid
CDK1	1.68868e-08	-0.216629	0.03	0.136	0.000294944	myeloid
SASH3	1.81519e-08	-0.191056	0.129	0.313	0.000317041	myeloid
SIL1	2.06128e-08	-0.117656	0.048	0.177	0.000360023	myeloid
TUBA1C	2.25616e-08	-0.20022	0.123	0.299	0.000394061	myeloid
RBMX	2.35734e-08	-0.202524	0.183	0.381	0.000411733	myeloid
EIF4H	2.36486e-08	-0.165775	0.135	0.32	0.000413047	myeloid
CD302	2.43661e-08	-0.194317	0.145	0.333	0.000425578	myeloid
HMOX1	2.64719e-08	-0.165168	0.068	0.211	0.000462358	myeloid
ARPC3	2.75452e-08	-0.24741	0.612	0.803	0.000481104	myeloid
CAT	2.79724e-08	-0.108998	0.039	0.156	0.000488566	myeloid
GIMAP2	2.80533e-08	-0.150615	0.103	0.272	0.000489979	myeloid
BLVRB	2.80686e-08	-0.232094	0.139	0.313	0.000490246	myeloid
ALOX5	2.82782e-08	-0.182008	0.157	0.354	0.000493907	myeloid
CAPG	2.97583e-08	-0.139535	0.093	0.259	0.000519758	myeloid
MYL12B	3.0143e-08	-0.273654	0.388	0.612	0.000526477	myeloid
DDX5	3.27474e-08	-0.247781	0.506	0.714	0.000571966	myeloid
PKM	3.31536e-08	-0.226808	0.465	0.707	0.000579061	myeloid
BIN2	3.35601e-08	-0.170234	0.077	0.224	0.00058616	myeloid
KARS	3.60048e-08	-0.173242	0.102	0.265	0.00062886	myeloid
LPCAT2	3.67191e-08	-0.169423	0.136	0.32	0.000641336	myeloid
TLR2	4.01204e-08	-0.242698	0.229	0.429	0.000700743	myeloid
PLK1	4.02296e-08	-0.118767	0.017	0.102	0.00070265	myeloid
MT2A	4.62056e-08	-0.598197	0.824	0.871	0.000807027	myeloid
RNASE2	4.63918e-08	-0.100856	0.02	0.109	0.000810279	myeloid
ITGB2	4.86347e-08	-0.177951	0.302	0.544	0.000849454	myeloid
CCNB1	5.97864e-08	-0.175443	0.026	0.122	0.00104423	myeloid
TAF10	6.02127e-08	-0.11843	0.051	0.177	0.00105168	myeloid
FMN1	6.52529e-08	-0.102376	0.047	0.17	0.00113971	myeloid
NCOR1	6.73214e-08	-0.20599	0.124	0.293	0.00117584	myeloid
TNIP2	7.06906e-08	-0.108173	0.051	0.177	0.00123468	myeloid
MFSD1	8.29637e-08	-0.179104	0.173	0.367	0.00144904	myeloid
DYSF	8.70035e-08	-0.126306	0.071	0.211	0.0015196	myeloid
MAP2K2	9.01116e-08	-0.121922	0.067	0.204	0.00157389	myeloid
SNTB1	9.37009e-08	-0.102259	0.035	0.143	0.00163658	myeloid
UBN1	1.10837e-07	-0.101374	0.033	0.136	0.00193588	myeloid
TSR3	1.23118e-07	-0.105642	0.039	0.15	0.00215038	myeloid
RACK1	1.24759e-07	0.254974	0.844	0.694	0.00217904	myeloid
CD53	1.31023e-07	-0.225218	0.425	0.653	0.00228844	myeloid
CDKN2D	1.31267e-07	-0.130136	0.072	0.211	0.0022927	myeloid
ARL8A	1.344e-07	-0.146588	0.069	0.204	0.00234743	myeloid
MAP3K2	1.34764e-07	-0.146536	0.101	0.259	0.0023538	myeloid
FCGR2A	1.37178e-07	-0.275644	0.374	0.571	0.00239596	myeloid
PSMD13	1.39362e-07	-0.121922	0.068	0.204	0.0024341	myeloid
TFEC	1.59233e-07	-0.14819	0.141	0.32	0.00278116	myeloid
KLF6	1.68958e-07	-0.261666	0.478	0.673	0.00295103	myeloid
FBXO6	1.79627e-07	-0.10063	0.043	0.156	0.00313737	myeloid
RNF187	1.90939e-07	-0.124364	0.065	0.197	0.00333495	myeloid
TSC22D3	1.92407e-07	-0.188884	0.203	0.401	0.00336057	myeloid
LCP1	1.96327e-07	-0.238892	0.499	0.714	0.00342905	myeloid
TECR	1.98771e-07	-0.121659	0.051	0.17	0.00347174	myeloid
PDIA4	2.13948e-07	-0.202256	0.167	0.347	0.00373682	myeloid
COX16	2.22959e-07	-0.146561	0.086	0.231	0.00389421	myeloid
PTK2B	2.33613e-07	-0.133489	0.098	0.252	0.00408028	myeloid
FAM50A	2.49163e-07	-0.113936	0.055	0.177	0.00435189	myeloid
SNX10	2.5039e-07	-0.289976	0.467	0.633	0.00437331	myeloid
HDAC1	2.5181e-07	-0.134984	0.067	0.197	0.00439811	myeloid
ATP5F1B	2.56468e-07	-0.216732	0.188	0.367	0.00447946	myeloid
SIAH2	2.61644e-07	-0.107746	0.044	0.156	0.00456988	myeloid
MCL1	2.84823e-07	-0.205852	0.438	0.673	0.00497472	myeloid
TCIRG1	2.92493e-07	-0.156887	0.123	0.286	0.00510869	myeloid
GAA	2.97372e-07	-0.110651	0.044	0.156	0.00519389	myeloid
LRPAP1	3.23462e-07	-0.145954	0.099	0.252	0.00564958	myeloid
GRN	3.39339e-07	-0.268679	0.32	0.503	0.0059269	myeloid
LAP3	3.42099e-07	-0.242704	0.482	0.68	0.0059751	myeloid
GNB2	3.6931e-07	-0.168677	0.214	0.415	0.00645036	myeloid
C3AR1	3.84629e-07	-0.139934	0.165	0.354	0.00671793	myeloid
MPP1	3.96742e-07	-0.102376	0.052	0.17	0.00692949	myeloid
CD8B	4.25131e-07	-0.191829	0.041	0.143	0.00742535	myeloid
ERAP1	4.60021e-07	-0.108998	0.06	0.184	0.00803473	myeloid
SLC25A24	4.92177e-07	-0.141215	0.102	0.252	0.00859637	myeloid
GM2A	5.08517e-07	-0.122907	0.08	0.218	0.00888175	myeloid
CNDP2	5.21569e-07	-0.196795	0.173	0.347	0.00910973	myeloid
ZYX	5.30208e-07	-0.189114	0.293	0.497	0.00926061	myeloid
LCK	5.77678e-07	-0.249823	0.064	0.184	0.0100897	myeloid
PFDN6	5.79342e-07	-0.117195	0.058	0.177	0.0101188	myeloid
COTL1	5.794e-07	-0.288114	0.646	0.769	0.0101198	myeloid
POLR2G	6.23828e-07	-0.121297	0.108	0.265	0.0108958	myeloid
WIPF1	6.33342e-07	-0.196634	0.251	0.442	0.011062	myeloid
CYTH1	6.64451e-07	-0.145948	0.112	0.265	0.0116053	myeloid
SDC3	7.02518e-07	-0.10063	0.043	0.15	0.0122702	myeloid
MAML2	7.06124e-07	-0.11438	0.047	0.156	0.0123332	myeloid
ZFP36	7.50125e-07	-0.205414	0.314	0.524	0.0131017	myeloid
LRRK2	7.53007e-07	-0.20279	0.187	0.361	0.013152	myeloid
SNX17	7.6156e-07	-0.157916	0.127	0.286	0.0133014	myeloid
CXCR4	7.84147e-07	-0.21557	0.19	0.367	0.0136959	myeloid
FERMT3	8.39599e-07	-0.162173	0.137	0.299	0.0146644	myeloid
MANF	8.85984e-07	-0.162479	0.157	0.327	0.0154746	myeloid
SNX6	8.87874e-07	-0.211909	0.235	0.422	0.0155076	myeloid
SURF4	8.89608e-07	-0.137037	0.101	0.245	0.0155379	myeloid
PSMB3	9.10733e-07	-0.164879	0.243	0.449	0.0159069	myeloid
DNM2	9.38426e-07	-0.102123	0.069	0.197	0.0163905	myeloid
HDLBP	9.46824e-07	-0.126018	0.082	0.218	0.0165372	myeloid
IRAK1	9.92798e-07	-0.117056	0.075	0.204	0.0173402	myeloid
HPCAL1	1.01373e-06	-0.101139	0.055	0.17	0.0177058	myeloid
AP1B1	1.02893e-06	-0.11507	0.071	0.197	0.0179713	myeloid
TMEM160	1.04568e-06	-0.163695	0.184	0.361	0.0182639	myeloid
PUF60	1.0539e-06	-0.114199	0.078	0.211	0.0184074	myeloid
CD68	1.15312e-06	-0.187483	0.239	0.429	0.0201404	myeloid
QSOX1	1.18087e-06	-0.128098	0.101	0.245	0.0206251	myeloid
MLEC	1.23444e-06	-0.131792	0.11	0.259	0.0215607	myeloid
AREG	1.28492e-06	-0.14027	0.022	0.102	0.0224424	myeloid
CST7	1.32446e-06	-0.139073	0.035	0.129	0.023133	myeloid
SCARB2	1.48692e-06	-0.182733	0.154	0.313	0.0259706	myeloid
SLC11A1	1.56025e-06	-0.199751	0.217	0.401	0.0272514	myeloid
GIMAP7	1.56919e-06	-0.297517	0.242	0.415	0.0274075	myeloid
TAP1	1.62987e-06	-0.193305	0.271	0.456	0.0284673	myeloid
KRTCAP2	1.81702e-06	-0.147484	0.207	0.395	0.0317361	myeloid
RAPGEF2	1.9578e-06	-0.108597	0.076	0.204	0.0341949	myeloid
CAPN1	1.99309e-06	-0.117509	0.069	0.19	0.0348113	myeloid
CAPZA1	2.00325e-06	0.422782	0.575	0.408	0.0349889	myeloid
NDUFS2	2.04229e-06	-0.101508	0.05	0.156	0.0356706	myeloid
UBALD2	2.05077e-06	-0.122932	0.128	0.286	0.0358188	myeloid
C4orf3	2.06893e-06	0.272998	0.838	0.728	0.0361359	myeloid
PCMT1	2.07781e-06	-0.162651	0.149	0.306	0.036291	myeloid
STUB1	2.15135e-06	-0.134784	0.108	0.252	0.0375755	myeloid
PDPK1	2.32665e-06	-0.113422	0.073	0.197	0.0406372	myeloid
CXCR3	2.33887e-06	-0.12415	0.024	0.102	0.0408507	myeloid
PSMA7	2.42556e-06	-0.218423	0.481	0.646	0.0423648	myeloid
HLA-DMB	2.45533e-06	-0.178124	0.259	0.449	0.0428848	myeloid
PPP1R14B	2.46815e-06	-0.103235	0.058	0.17	0.0431087	myeloid
MAFB	2.51823e-06	-0.338154	0.471	0.626	0.0439834	myeloid
RHOH	2.62567e-06	-0.105246	0.043	0.143	0.04586	myeloid
PLEKHO1	2.82851e-06	-0.201848	0.298	0.497	0.0494027	myeloid
CALHM6	1.59342e-135	-1.05087	0.235	0.737	2.78307e-131	granulo
IFITM1	7.28576e-127	-1.05383	0.207	0.708	1.27253e-122	granulo
TYMP	3.4091e-101	-0.853233	0.537	0.86	5.95433e-97	granulo
HLA-B	2.49396e-98	-0.554867	0.97	0.994	4.35595e-94	granulo
GAPDH	1.25426e-90	-0.600051	0.972	1	2.19069e-86	granulo
GBP5	2.07009e-90	-0.802339	0.278	0.7	3.61562e-86	granulo
BRI3	1.23038e-86	-0.61996	0.227	0.65	2.14899e-82	granulo
B2M	1.60506e-86	-0.417138	0.999	1	2.8034e-82	granulo
GABARAP	1.7581e-84	-0.666013	0.288	0.689	3.0707e-80	granulo
HLA-A	6.03226e-81	-0.622584	0.713	0.931	1.0536e-76	granulo
HLA-DRB1	1.35198e-77	-0.789999	0.747	0.955	2.36137e-73	granulo
UBC	7.3681e-76	-0.551525	0.331	0.762	1.28691e-71	granulo
RAC1	1.272e-70	-0.56156	0.299	0.674	2.22167e-66	granulo
SOCS1	2.82908e-69	-0.356662	0.042	0.322	4.94127e-65	granulo
IFITM3	4.44292e-69	-0.607227	0.772	0.922	7.76e-65	granulo
VIM	8.92387e-68	-0.614492	0.809	0.959	1.55864e-63	granulo
AC020656.1	1.73674e-66	1.63562	0.573	0.132	3.03339e-62	granulo
PSMB9	2.61835e-65	-0.504241	0.467	0.823	4.57321e-61	granulo
SH3BGRL3	2.38542e-64	0.482996	0.993	0.978	4.16637e-60	granulo
CHCHD10	3.86985e-64	-0.289221	0.04	0.305	6.75908e-60	granulo
HLA-C	4.28608e-61	-0.446951	0.835	0.968	7.48607e-57	granulo
MALAT1	4.46585e-61	-0.416654	0.999	0.987	7.80005e-57	granulo
PPDPF	2.59334e-60	-0.487889	0.434	0.788	4.52952e-56	granulo
ATP5F1D	1.71619e-59	-0.34478	0.129	0.467	2.99749e-55	granulo
IL1R2	8.64791e-58	-0.672773	0.285	0.635	1.51044e-53	granulo
IGFLR1	9.90694e-57	-0.319069	0.088	0.382	1.73035e-52	granulo
CEBPD	1.83845e-55	-0.59333	0.43	0.726	3.21103e-51	granulo
CTSL	5.67378e-55	-0.384194	0.128	0.447	9.90982e-51	granulo
IFITM2	2.52688e-52	-0.528705	0.792	0.933	4.41345e-48	granulo
NUCB1	4.8651e-52	-0.286139	0.119	0.428	8.49738e-48	granulo
FCGR1A	1.31456e-50	-0.43155	0.357	0.695	2.296e-46	granulo
CD163	3.13064e-50	-0.583342	0.733	0.847	5.46798e-46	granulo
ENO1	5.80355e-50	-0.406416	0.619	0.901	1.01365e-45	granulo
ALDOA	8.73482e-49	-0.320772	0.129	0.43	1.52562e-44	granulo
PSMB10	4.154e-48	-0.343049	0.177	0.495	7.25538e-44	granulo
RNF145	7.62071e-47	-0.303698	0.104	0.378	1.33103e-42	granulo
NME2	1.36211e-46	-0.199384	0.033	0.235	2.37906e-42	granulo
IDO1	2.40422e-45	-0.15872	0.009	0.16	4.19921e-41	granulo
FCGR1B	1.10405e-43	-0.35582	0.216	0.525	1.92834e-39	granulo
APOL4	2.55361e-43	-0.225402	0.051	0.268	4.46014e-39	granulo
SERPINA1	5.31583e-43	-0.454028	0.45	0.739	9.28463e-39	granulo
CD53	3.34598e-42	-0.378665	0.399	0.704	5.84408e-38	granulo
SAP30	4.37826e-42	-0.409423	0.248	0.542	7.64707e-38	granulo
NCF1	1.93868e-41	-0.441736	0.314	0.622	3.38609e-37	granulo
C4orf48	2.29131e-41	-0.291663	0.138	0.413	4.00199e-37	granulo
SERPING1	7.01715e-41	-0.358206	0.227	0.521	1.22562e-36	granulo
HK2	1.44866e-40	-0.479694	0.288	0.572	2.53024e-36	granulo
IFI30	2.67183e-40	-0.428198	0.351	0.654	4.66662e-36	granulo
RNF187	2.71241e-40	-0.223978	0.072	0.3	4.7375e-36	granulo
FCGR2B	2.92696e-40	-0.376778	0.154	0.428	5.11222e-36	granulo
RNASEK	1.07702e-39	-0.204338	0.076	0.309	1.88112e-35	granulo
RARRES3	2.27478e-39	-0.366003	0.272	0.568	3.97313e-35	granulo
LYZ	2.44191e-39	0.223003	0.94	0.836	4.26504e-35	granulo
GBP2	2.58586e-39	-0.370209	0.325	0.626	4.51645e-35	granulo
ASCL2	3.67801e-39	-0.163377	0.03	0.205	6.42401e-35	granulo
GNS	4.59826e-39	-0.30701	0.218	0.516	8.03131e-35	granulo
VSIG4	6.85135e-38	-0.375635	0.219	0.499	1.19666e-33	granulo
CTSD	7.39143e-38	-0.398544	0.319	0.622	1.29099e-33	granulo
CEBPB	1.19372e-37	-0.533665	0.476	0.695	2.08495e-33	granulo
CTSS	2.22497e-37	-0.419093	0.78	0.892	3.88613e-33	granulo
PKM	8.92312e-37	-0.363853	0.513	0.797	1.55851e-32	granulo
SECTM1	1.27236e-36	-0.247077	0.124	0.376	2.2223e-32	granulo
EEF1G	2.14459e-36	-0.146569	0.022	0.175	3.74575e-32	granulo
FCGR2A	1.6973e-35	-0.380721	0.506	0.754	2.9645e-31	granulo
PSME1	5.745e-35	-0.343049	0.519	0.782	1.00342e-30	granulo
IL1RN	1.30787e-34	-0.251285	0.088	0.307	2.28433e-30	granulo
EHBP1L1	3.25164e-34	-0.156812	0.036	0.203	5.67931e-30	granulo
MYL6	4.53431e-34	-0.297719	0.876	0.968	7.91962e-30	granulo
CREG1	4.98356e-34	-0.210813	0.09	0.309	8.70428e-30	granulo
GLUL	1.10563e-33	-0.619016	0.742	0.844	1.93109e-29	granulo
S100A6	1.27137e-33	-0.333009	0.99	0.981	2.22058e-29	granulo
C7orf50	3.88526e-33	-0.312759	0.275	0.555	6.786e-29	granulo
MIF	7.94417e-33	-0.486913	0.84	0.903	1.38753e-28	granulo
HIF1A-AS2	2.02277e-32	-0.276981	0.115	0.341	3.53296e-28	granulo
ATP5F1E	4.62321e-32	0.357451	0.991	0.974	8.07489e-28	granulo
LAPTM5	4.79034e-32	-0.34687	0.697	0.866	8.3668e-28	granulo
PFDN5	4.8667e-32	0.336969	0.95	0.89	8.50018e-28	granulo
TMA7	1.60204e-31	0.400894	0.801	0.579	2.79813e-27	granulo
ANKRD22	1.7641e-31	-0.288847	0.202	0.46	3.08117e-27	granulo
TAP1	1.90847e-31	-0.267763	0.206	0.462	3.33333e-27	granulo
CTSZ	1.96209e-31	-0.304951	0.28	0.546	3.42699e-27	granulo
TPI1	2.17712e-31	-0.333952	0.735	0.914	3.80256e-27	granulo
LYL1	3.59181e-31	-0.138207	0.033	0.186	6.27346e-27	granulo
HLA-E	3.92011e-31	-0.306498	0.642	0.855	6.84686e-27	granulo
CAPG	6.15896e-31	-0.220409	0.101	0.317	1.07572e-26	granulo
RAB13	1.74725e-30	-0.26811	0.143	0.378	3.05175e-26	granulo
HEBP2	2.82961e-30	-0.182157	0.069	0.257	4.94219e-26	granulo
RNASE6	3.10311e-30	-0.359962	0.331	0.581	5.41989e-26	granulo
EEF1B2	4.37061e-30	0.373336	0.676	0.423	7.6337e-26	granulo
HLA-DRA	1.46513e-29	-0.344199	0.946	0.968	2.559e-25	granulo
ISG20	1.94717e-29	-0.306379	0.249	0.516	3.40093e-25	granulo
NAGK	1.96203e-29	-0.207483	0.128	0.354	3.42689e-25	granulo
POLD4	4.83709e-29	-0.169953	0.06	0.235	8.44846e-25	granulo
SLC16A3	5.33676e-29	-0.318757	0.367	0.618	9.32119e-25	granulo
IFI6	2.91918e-28	-0.361528	0.622	0.799	5.09864e-24	granulo
LGALS3	3.81238e-28	-0.253926	0.162	0.389	6.6587e-24	granulo
RAPGEF2	4.51983e-28	-0.16924	0.07	0.251	7.89434e-24	granulo
LYSMD2	5.26514e-28	-0.15618	0.052	0.216	9.19609e-24	granulo
TMSB4X	8.18275e-28	0.280622	1	1	1.4292e-23	granulo
FAM50A	8.21189e-28	-0.155583	0.06	0.231	1.43429e-23	granulo
JUN	1.25497e-27	-0.226811	0.067	0.242	2.19194e-23	granulo
CD63	2.19013e-27	-0.363555	0.623	0.812	3.82527e-23	granulo
CYBA	4.05978e-27	-0.28905	0.898	0.963	7.0908e-23	granulo
PDXK	4.81049e-27	-0.200262	0.11	0.313	8.402e-23	granulo
COTL1	8.82197e-27	-0.308219	0.567	0.767	1.54085e-22	granulo
CD74	1.02541e-26	-0.377448	0.935	0.974	1.79099e-22	granulo
PIK3AP1	1.39884e-26	-0.275242	0.29	0.538	2.44321e-22	granulo
IL10RB	1.61445e-26	-0.146837	0.054	0.216	2.8198e-22	granulo
SLC16A6	2.32047e-26	-0.146065	0.036	0.175	4.05293e-22	granulo
MFGE8	2.45857e-26	-0.12774	0.029	0.16	4.29414e-22	granulo
FTH1	2.94151e-26	0.391555	1	1	5.13764e-22	granulo
SRSF9	6.35954e-26	-0.223632	0.199	0.438	1.11076e-21	granulo
ITGB2	6.60316e-26	-0.311391	0.335	0.587	1.15331e-21	granulo
C18orf32	1.85034e-25	-0.15558	0.063	0.227	3.2318e-21	granulo
TRAPPC5	2.00046e-25	-0.114669	0.027	0.151	3.49401e-21	granulo
APLP2	2.27784e-25	-0.292778	0.481	0.706	3.97848e-21	granulo
SLC3A2	2.39143e-25	-0.141464	0.049	0.201	4.17688e-21	granulo
APBB1IP	2.44699e-25	-0.196069	0.144	0.359	4.27391e-21	granulo
TMBIM6	2.614e-25	-0.249996	0.416	0.683	4.56562e-21	granulo
PNRC1	4.18836e-25	-0.339838	0.317	0.546	7.31539e-21	granulo
TCN2	4.23821e-25	-0.176241	0.107	0.302	7.40246e-21	granulo
HPCAL1	5.7614e-25	-0.157296	0.066	0.231	1.00629e-20	granulo
SPI1	1.14532e-24	-0.247417	0.292	0.536	2.00041e-20	granulo
CD68	1.30544e-24	-0.262861	0.331	0.572	2.28009e-20	granulo
S100A10	2.41405e-24	-0.345402	0.821	0.92	4.21638e-20	granulo
OST4	3.13467e-24	0.303197	0.801	0.657	5.47502e-20	granulo
NBEAL1	4.00106e-24	0.301471	0.307	0.08	6.98825e-20	granulo
APOL1	6.40458e-24	-0.134251	0.046	0.188	1.11862e-19	granulo
CDKN1A	1.37589e-23	-0.187852	0.125	0.322	2.40313e-19	granulo
SERF2	2.71346e-23	0.228932	0.999	0.996	4.73933e-19	granulo
H1FX	3.58882e-23	-0.140786	0.044	0.181	6.26823e-19	granulo
MYL12A	3.79671e-23	-0.240853	0.527	0.756	6.63133e-19	granulo
BLVRB	5.48623e-23	-0.261753	0.218	0.432	9.58225e-19	granulo
UGP2	5.50332e-23	-0.250188	0.244	0.467	9.6121e-19	granulo
TSC22D3	5.71068e-23	-0.264326	0.277	0.503	9.97427e-19	granulo
P4HB	5.85337e-23	-0.246573	0.305	0.538	1.02235e-18	granulo
PLEKHO1	6.57108e-23	-0.286964	0.259	0.479	1.14771e-18	granulo
FAM173A	6.9093e-23	-0.10038	0.02	0.125	1.20678e-18	granulo
TAF10	8.30771e-23	-0.120516	0.035	0.16	1.45102e-18	granulo
HAPLN3	1.09913e-22	-0.111439	0.025	0.138	1.91975e-18	granulo
CHPT1	1.11265e-22	-0.149785	0.066	0.22	1.94335e-18	granulo
DYNC1I2	1.42755e-22	-0.194321	0.14	0.335	2.49335e-18	granulo
PLIN2	1.99265e-22	-0.438264	0.304	0.523	3.48037e-18	granulo
GPI	2.16486e-22	-0.234699	0.238	0.458	3.78114e-18	granulo
DAP	2.50743e-22	-0.138011	0.059	0.207	4.37949e-18	granulo
PRDX2	2.9635e-22	-0.146188	0.045	0.179	5.17605e-18	granulo
LSP1	3.7549e-22	-0.247431	0.293	0.525	6.55831e-18	granulo
MT1E	6.159e-22	-0.324768	0.064	0.212	1.07573e-17	granulo
MYL12B	6.61931e-22	-0.221396	0.362	0.613	1.15613e-17	granulo
CD86	8.35642e-22	-0.183366	0.179	0.391	1.45953e-17	granulo
MXI1	1.30441e-21	-0.274226	0.206	0.41	2.27829e-17	granulo
SQOR	1.52671e-21	-0.21618	0.201	0.408	2.66654e-17	granulo
PSMB3	1.64401e-21	-0.209848	0.266	0.497	2.87143e-17	granulo
CTNNBL1	1.71924e-21	-0.124096	0.051	0.188	3.00283e-17	granulo
RGS2	2.00641e-21	-0.23116	0.109	0.287	3.50439e-17	granulo
PTPN6	2.16689e-21	-0.184518	0.149	0.343	3.7847e-17	granulo
ITM2B	2.69658e-21	-0.242359	0.692	0.847	4.70985e-17	granulo
HSPA5	3.3516e-21	-0.312551	0.295	0.514	5.85391e-17	granulo
GAA	3.90207e-21	-0.133403	0.062	0.207	6.81536e-17	granulo
CTSA	4.27085e-21	-0.187047	0.141	0.33	7.45947e-17	granulo
TLR8	4.39311e-21	-0.140143	0.081	0.242	7.67301e-17	granulo
ZNF395	4.99015e-21	-0.241732	0.186	0.384	8.71579e-17	granulo
KCNMA1	5.44719e-21	-0.20205	0.167	0.367	9.51407e-17	granulo
SDF4	5.88953e-21	-0.111903	0.036	0.156	1.02867e-16	granulo
MAP2K2	5.99961e-21	-0.127943	0.059	0.201	1.04789e-16	granulo
TNFSF10	6.70978e-21	-0.286515	0.41	0.616	1.17193e-16	granulo
PDIA3	6.74878e-21	-0.22475	0.285	0.505	1.17874e-16	granulo
PTMS	8.45735e-21	-0.10792	0.029	0.14	1.47716e-16	granulo
IL18BP	9.18717e-21	-0.17727	0.106	0.276	1.60463e-16	granulo
TNFRSF1B	9.22353e-21	-0.258561	0.309	0.536	1.61098e-16	granulo
AC103591.3	1.05608e-20	-0.140525	0.026	0.132	1.84454e-16	granulo
RACK1	1.05961e-20	0.241006	0.901	0.747	1.85072e-16	granulo
BTG1	1.20676e-20	-0.263597	0.344	0.577	2.10772e-16	granulo
UBB	1.3163e-20	-0.294165	0.224	0.428	2.29905e-16	granulo
RAB7A	1.66992e-20	-0.195399	0.259	0.486	2.91668e-16	granulo
NCF2	2.29477e-20	-0.2376	0.301	0.516	4.00805e-16	granulo
CNBP	2.32007e-20	-0.199945	0.319	0.557	4.05223e-16	granulo
GRN	2.34592e-20	-0.266705	0.347	0.559	4.09739e-16	granulo
XIST	2.66507e-20	-0.180971	0.184	0.393	4.65482e-16	granulo
PGK1	2.98287e-20	-0.250861	0.656	0.855	5.20988e-16	granulo
PSME2	3.50701e-20	-0.291538	0.546	0.737	6.12534e-16	granulo
LGALS3BP	3.54923e-20	-0.12123	0.036	0.153	6.19909e-16	granulo
CDV3	3.70521e-20	-0.176386	0.138	0.322	6.47152e-16	granulo
ADAM28	3.74943e-20	-0.199056	0.135	0.317	6.54875e-16	granulo
RAB5IF	4.10734e-20	-0.203533	0.225	0.436	7.17387e-16	granulo
EVI2A	4.73065e-20	-0.219098	0.233	0.445	8.26255e-16	granulo
SNX10	6.45185e-20	-0.299053	0.493	0.663	1.12688e-15	granulo
HSP90B1	8.93294e-20	-0.269773	0.37	0.585	1.56023e-15	granulo
AOAH	1.03911e-19	-0.122646	0.043	0.164	1.81492e-15	granulo
NDRG1	1.14604e-19	-0.23274	0.165	0.35	2.00168e-15	granulo
CALM3	1.36104e-19	-0.217893	0.365	0.603	2.37719e-15	granulo
DNAJC15	1.38989e-19	-0.19883	0.253	0.467	2.42759e-15	granulo
B4GALT1	1.44864e-19	0.387289	0.258	0.067	2.5302e-15	granulo
RAB5C	1.60582e-19	-0.185591	0.185	0.382	2.80473e-15	granulo
LACTB	2.24436e-19	-0.148904	0.119	0.292	3.91999e-15	granulo
NMT1	3.37446e-19	-0.143037	0.083	0.233	5.89383e-15	granulo
DUSP1	4.02565e-19	-0.269355	0.462	0.663	7.03119e-15	granulo
ALDH2	5.11785e-19	-0.157181	0.098	0.257	8.93884e-15	granulo
LST1	5.21157e-19	0.295091	0.841	0.767	9.10253e-15	granulo
PPIB	8.82483e-19	-0.204649	0.311	0.525	1.54134e-14	granulo
EVI2B	1.19768e-18	-0.225131	0.357	0.575	2.09187e-14	granulo
SQSTM1	1.34216e-18	-0.159931	0.104	0.263	2.34422e-14	granulo
SMARCD3	1.5234e-18	-0.107745	0.038	0.151	2.66077e-14	granulo
NENF	1.8879e-18	-0.108088	0.033	0.14	3.2974e-14	granulo
SAMSN1	1.9821e-18	-0.217255	0.35	0.568	3.46193e-14	granulo
CFL1	3.0811e-18	-0.244292	0.882	0.942	5.38145e-14	granulo
MYOF	3.14662e-18	-0.155464	0.128	0.298	5.49589e-14	granulo
ATG3	4.07889e-18	-0.207521	0.331	0.538	7.12419e-14	granulo
LCP1	4.56118e-18	-0.217952	0.446	0.641	7.96656e-14	granulo
VSIR	5.20307e-18	-0.209026	0.388	0.59	9.08769e-14	granulo
GPR146	5.23791e-18	-0.107577	0.035	0.143	9.14853e-14	granulo
FCER1G	6.13584e-18	-0.209901	0.951	0.933	1.07169e-13	granulo
ATP5PD	6.5736e-18	-0.205511	0.267	0.469	1.14814e-13	granulo
CAPZB	6.90995e-18	-0.200862	0.277	0.482	1.20689e-13	granulo
CDC42	9.85716e-18	0.602641	0.623	0.484	1.72165e-13	granulo
TMEM140	1.00908e-17	-0.126492	0.052	0.173	1.76246e-13	granulo
FLT1	1.12342e-17	-0.109095	0.04	0.151	1.96217e-13	granulo
SRM	1.18667e-17	-0.108519	0.031	0.132	2.07263e-13	granulo
ARPC3	1.19194e-17	-0.236496	0.682	0.834	2.08184e-13	granulo
FOS	1.5126e-17	-0.366414	0.57	0.756	2.6419e-13	granulo
NASP	1.53026e-17	-0.14591	0.084	0.227	2.67275e-13	granulo
MAP1LC3B	1.69852e-17	-0.22891	0.306	0.508	2.96663e-13	granulo
PGAM1	1.72039e-17	-0.195895	0.383	0.598	3.00483e-13	granulo
GBP1	1.94487e-17	-0.318407	0.518	0.674	3.39691e-13	granulo
CALM2	1.99642e-17	-0.207307	0.782	0.922	3.48694e-13	granulo
SLC25A37	2.12973e-17	-0.347076	0.434	0.607	3.71978e-13	granulo
CUL1	2.80068e-17	-0.127912	0.081	0.222	4.89167e-13	granulo
PFKP	2.80213e-17	-0.107745	0.039	0.147	4.8942e-13	granulo
EGLN3	3.15199e-17	-0.127409	0.05	0.168	5.50526e-13	granulo
DDT	3.27437e-17	-0.209836	0.328	0.525	5.71902e-13	granulo
CSNK2B	3.39852e-17	-0.183108	0.234	0.428	5.93586e-13	granulo
EGR1	3.64748e-17	-0.209661	0.313	0.516	6.37069e-13	granulo
LAP3	3.65143e-17	-0.230389	0.56	0.741	6.37759e-13	granulo
PCNA	4.13628e-17	-0.159812	0.024	0.114	7.22443e-13	granulo
HLA-DMB	4.16301e-17	-0.21841	0.261	0.449	7.27111e-13	granulo
H2AFY	4.83028e-17	-0.194369	0.458	0.665	8.43657e-13	granulo
ESYT2	6.44978e-17	-0.113093	0.05	0.166	1.12652e-12	granulo
SLC15A4	7.01902e-17	-0.115546	0.063	0.19	1.22594e-12	granulo
BTF3	8.5218e-17	0.245783	0.76	0.616	1.48842e-12	granulo
GM2A	8.97694e-17	-0.150697	0.154	0.328	1.56791e-12	granulo
FAU	9.07718e-17	0.206533	0.99	0.987	1.58542e-12	granulo
JUNB	9.08051e-17	-0.268722	0.46	0.674	1.586e-12	granulo
RNASE1	9.46061e-17	-0.224223	0.049	0.162	1.65239e-12	granulo
LTB4R	1.47761e-16	-0.113312	0.053	0.171	2.58079e-12	granulo
DNAJC1	1.59598e-16	-0.106142	0.044	0.153	2.78754e-12	granulo
CLEC2B	1.63941e-16	-0.202226	0.3	0.495	2.86339e-12	granulo
NUB1	1.68508e-16	-0.147198	0.11	0.261	2.94316e-12	granulo
CBWD2	1.92829e-16	-0.119177	0.08	0.216	3.36795e-12	granulo
BRD7	1.93232e-16	-0.107987	0.058	0.179	3.37498e-12	granulo
COPE	2.19937e-16	-0.176591	0.273	0.473	3.84142e-12	granulo
UBA1	2.31856e-16	-0.114691	0.059	0.179	4.0496e-12	granulo
RNF130	2.3928e-16	-0.191876	0.331	0.531	4.17926e-12	granulo
GRB2	2.5397e-16	-0.199277	0.356	0.559	4.43584e-12	granulo
NDUFA13	2.58069e-16	-0.179072	0.324	0.527	4.50743e-12	granulo
ZFP36	2.75125e-16	-0.27187	0.419	0.609	4.80533e-12	granulo
PSAP	2.97665e-16	-0.241801	0.751	0.851	5.19902e-12	granulo
PTPRC	3.10294e-16	-0.200346	0.481	0.702	5.4196e-12	granulo
MRPL28	3.69184e-16	-0.105575	0.057	0.177	6.44817e-12	granulo
VEGFA	5.93169e-16	-0.130433	0.079	0.212	1.03603e-11	granulo
ALOX5	5.95472e-16	-0.16787	0.188	0.365	1.04005e-11	granulo
HMGB2	6.05349e-16	-0.347145	0.486	0.665	1.0573e-11	granulo
DNAJC5	7.1227e-16	-0.114736	0.073	0.203	1.24405e-11	granulo
RBMX	8.25069e-16	-0.150098	0.144	0.305	1.44107e-11	granulo
RHOBTB3	8.46822e-16	-0.119294	0.049	0.16	1.47906e-11	granulo
SORT1	8.74579e-16	-0.136332	0.098	0.24	1.52754e-11	granulo
MARCO	9.93354e-16	-0.14824	0.199	0.384	1.73499e-11	granulo
EFHD2	1.03855e-15	-0.17673	0.302	0.503	1.81393e-11	granulo
EIF2S2	1.23487e-15	-0.185533	0.278	0.469	2.15682e-11	granulo
PSTPIP2	1.28244e-15	-0.216772	0.294	0.477	2.2399e-11	granulo
ALOX15B	1.33248e-15	-0.122205	0.066	0.188	2.32732e-11	granulo
ARF1	1.44242e-15	-0.172037	0.307	0.51	2.51933e-11	granulo
GBP4	1.51896e-15	-0.190865	0.204	0.371	2.65301e-11	granulo
FBP1	1.53084e-15	-0.235717	0.302	0.492	2.67376e-11	granulo
MAP3K7CL	1.56061e-15	-0.193305	0.207	0.384	2.72576e-11	granulo
MTFP1	1.56724e-15	-0.121965	0.077	0.205	2.73734e-11	granulo
SASH3	1.58898e-15	-0.138953	0.118	0.268	2.77531e-11	granulo
SCIMP	1.62791e-15	-0.144408	0.159	0.326	2.84331e-11	granulo
SNRNP70	1.67275e-15	-0.103198	0.048	0.156	2.92163e-11	granulo
NCF4	1.67541e-15	-0.129717	0.1	0.242	2.92626e-11	granulo
DEK	1.86646e-15	-0.249061	0.533	0.683	3.25996e-11	granulo
LRRK2	1.94471e-15	-0.189791	0.223	0.397	3.39662e-11	granulo
ELL2	1.99305e-15	-0.114968	0.062	0.181	3.48107e-11	granulo
COMMD6	2.02936e-15	0.235169	0.653	0.475	3.54449e-11	granulo
FOSB	2.17488e-15	-0.107322	0.029	0.119	3.79864e-11	granulo
ERLIN1	2.24866e-15	-0.106732	0.046	0.151	3.92751e-11	granulo
ITGAM	2.57252e-15	-0.138118	0.165	0.335	4.49317e-11	granulo
RHOA	3.0435e-15	-0.197372	0.596	0.788	5.31577e-11	granulo
BCL2A1	3.31624e-15	-0.215406	0.375	0.572	5.79214e-11	granulo
TUBB	3.41143e-15	-0.369395	0.234	0.408	5.9584e-11	granulo
TSPO	3.43144e-15	-0.22701	0.607	0.769	5.99336e-11	granulo
ATP5F1B	3.95711e-15	-0.160647	0.159	0.32	6.9115e-11	granulo
SULF2	4.7453e-15	-0.153842	0.139	0.296	8.28814e-11	granulo
P4HA1	4.88879e-15	-0.180653	0.206	0.378	8.53876e-11	granulo
HSD17B4	5.08844e-15	-0.11028	0.069	0.19	8.88747e-11	granulo
FAM13A	5.66213e-15	-0.146809	0.127	0.276	9.88948e-11	granulo
CHST11	6.03808e-15	-0.119356	0.086	0.218	1.05461e-10	granulo
MANF	6.0688e-15	-0.181241	0.173	0.335	1.05998e-10	granulo
ODF3B	6.15128e-15	-0.170165	0.236	0.415	1.07438e-10	granulo
C1orf56	6.17072e-15	0.323082	0.196	0.048	1.07778e-10	granulo
ZNF90	6.18998e-15	0.124136	0.128	0.004	1.08114e-10	granulo
ZNF385A	6.31777e-15	-0.145987	0.16	0.324	1.10346e-10	granulo
HILPDA	6.46887e-15	-0.205956	0.13	0.279	1.12985e-10	granulo
CLTB	6.53538e-15	-0.103742	0.059	0.173	1.14147e-10	granulo
PHC2	7.88083e-15	-0.196515	0.293	0.477	1.37647e-10	granulo
MARCH1	8.22347e-15	-0.22837	0.568	0.721	1.43631e-10	granulo
ZNF467	8.35024e-15	-0.101246	0.046	0.149	1.45845e-10	granulo
WAS	8.41085e-15	-0.141572	0.152	0.311	1.46904e-10	granulo
C3AR1	1.02928e-14	-0.156442	0.157	0.317	1.79774e-10	granulo
TUBA1B	1.2299e-14	-0.275265	0.63	0.829	2.14815e-10	granulo
SYF2	1.29864e-14	-0.15004	0.243	0.43	2.2682e-10	granulo
LGALS2	1.3214e-14	0.223124	0.265	0.095	2.30796e-10	granulo
MIF-AS1	1.36837e-14	0.138596	0.152	0.019	2.38999e-10	granulo
PSMC3	1.85193e-14	-0.114321	0.062	0.175	3.23459e-10	granulo
SIRPB1	1.90088e-14	-0.107816	0.061	0.175	3.32007e-10	granulo
CXCR4	2.27347e-14	-0.239867	0.256	0.432	3.97084e-10	granulo
TALDO1	2.31033e-14	-0.172591	0.179	0.339	4.03522e-10	granulo
PTK2B	2.3934e-14	-0.137313	0.116	0.257	4.18031e-10	granulo
PSMA5	2.4181e-14	-0.11735	0.093	0.225	4.22345e-10	granulo
SHKBP1	2.45875e-14	-0.130631	0.095	0.227	4.29445e-10	granulo
CLEC4E	2.56883e-14	-0.147146	0.173	0.337	4.48671e-10	granulo
FES	2.734e-14	-0.112736	0.08	0.205	4.7752e-10	granulo
ATP5MPL	3.18749e-14	0.245484	0.756	0.672	5.56726e-10	granulo
NCSTN	3.32744e-14	-0.115075	0.082	0.207	5.81171e-10	granulo
RAB11B	3.50843e-14	-0.107404	0.069	0.186	6.12783e-10	granulo
POLR2G	3.67795e-14	-0.120715	0.094	0.225	6.42392e-10	granulo
CARS2	3.77468e-14	-0.143925	0.115	0.255	6.59285e-10	granulo
FKBP8	3.8674e-14	-0.153383	0.284	0.473	6.7548e-10	granulo
RNF149	3.94406e-14	-0.17143	0.324	0.51	6.8887e-10	granulo
CXCL16	4.50942e-14	-0.135294	0.173	0.339	7.87614e-10	granulo
CST3	4.92453e-14	-0.252099	0.894	0.905	8.60118e-10	granulo
DBNL	5.16539e-14	-0.13229	0.142	0.294	9.02187e-10	granulo
NUCB2	5.23209e-14	-0.11541	0.06	0.171	9.13837e-10	granulo
ANKRD37	6.57721e-14	-0.15883	0.101	0.231	1.14877e-09	granulo
ATP6AP1	6.62949e-14	-0.135343	0.136	0.283	1.15791e-09	granulo
FGL2	6.92828e-14	-0.267467	0.552	0.685	1.21009e-09	granulo
GSTK1	7.00904e-14	-0.168612	0.317	0.503	1.2242e-09	granulo
AP2S1	7.25321e-14	-0.189345	0.501	0.687	1.26685e-09	granulo
H2AFJ	7.71346e-14	-0.153842	0.178	0.337	1.34723e-09	granulo
TIFA	7.77983e-14	-0.118971	0.088	0.214	1.35883e-09	granulo
PTAFR	8.59341e-14	-0.125363	0.129	0.274	1.50093e-09	granulo
RHOG	9.19038e-14	-0.169512	0.428	0.626	1.60519e-09	granulo
BCL6	9.54774e-14	-0.104937	0.067	0.181	1.66761e-09	granulo
PSMA7	1.08989e-13	-0.204071	0.438	0.616	1.90361e-09	granulo
FCGR3A	1.20807e-13	-0.286579	0.376	0.546	2.11001e-09	granulo
TLR1	1.60358e-13	-0.103124	0.072	0.188	2.80081e-09	granulo
FPR2	1.71472e-13	-0.167362	0.22	0.384	2.99492e-09	granulo
DDOST	1.87643e-13	-0.100945	0.053	0.156	3.27737e-09	granulo
CD300A	1.95279e-13	-0.138804	0.135	0.279	3.41074e-09	granulo
AIF1	2.07661e-13	-0.194852	0.911	0.933	3.62701e-09	granulo
MX2	2.19146e-13	-0.162273	0.199	0.361	3.8276e-09	granulo
DPYD	2.20007e-13	-0.166556	0.225	0.387	3.84264e-09	granulo
CAPZA1	2.33473e-13	0.354089	0.542	0.4	4.07784e-09	granulo
ETV6	2.43259e-13	-0.13514	0.14	0.285	4.24876e-09	granulo
PHF21A	2.90899e-13	-0.111695	0.095	0.222	5.08085e-09	granulo
AGTPBP1	3.39039e-13	-0.120269	0.095	0.22	5.92166e-09	granulo
UBA52	3.6993e-13	0.164192	0.988	0.981	6.46121e-09	granulo
ANXA2	3.87604e-13	-0.173955	0.357	0.544	6.76989e-09	granulo
UBE2L6	4.139e-13	-0.205984	0.331	0.492	7.22918e-09	granulo
WDR45B	4.50698e-13	-0.121444	0.097	0.222	7.87188e-09	granulo
ERGIC1	5.08468e-13	-0.136423	0.156	0.305	8.88091e-09	granulo
SAT1	5.09953e-13	-0.269761	0.975	0.927	8.90684e-09	granulo
SLC2A3	5.16008e-13	-0.370232	0.495	0.641	9.01259e-09	granulo
CALCOCO2	5.20552e-13	-0.15135	0.204	0.365	9.09196e-09	granulo
CTSB	5.57265e-13	-0.249448	0.765	0.827	9.73319e-09	granulo
RSU1	6.55563e-13	-0.117598	0.1	0.227	1.14501e-08	granulo
LYN	6.6622e-13	-0.158267	0.321	0.497	1.16362e-08	granulo
CNDP2	7.63333e-13	-0.14264	0.199	0.359	1.33324e-08	granulo
HNRNPH1	9.49063e-13	0.47726	0.306	0.151	1.65763e-08	granulo
ARPC2	1.27077e-12	0.208145	0.905	0.851	2.21953e-08	granulo
STAT3	1.35048e-12	-0.167343	0.227	0.384	2.35874e-08	granulo
IRAK3	1.38472e-12	-0.173979	0.259	0.417	2.41854e-08	granulo
R3HDM4	1.42385e-12	-0.104795	0.078	0.192	2.48689e-08	granulo
OGFR	1.49214e-12	-0.133255	0.168	0.315	2.60617e-08	granulo
EREG	1.67373e-12	-0.121507	0.064	0.168	2.92334e-08	granulo
OS9	1.78747e-12	-0.119413	0.122	0.255	3.12199e-08	granulo
LAMP1	1.85966e-12	-0.139296	0.174	0.324	3.24808e-08	granulo
IFI16	2.03266e-12	-0.193759	0.433	0.598	3.55024e-08	granulo
DUSP3	2.19089e-12	-0.122283	0.137	0.276	3.82662e-08	granulo
RAB20	2.21605e-12	-0.126488	0.132	0.268	3.87054e-08	granulo
CYBC1	2.66214e-12	-0.12888	0.181	0.333	4.6497e-08	granulo
CD300E	2.70682e-12	-0.144129	0.201	0.361	4.72773e-08	granulo
PLAUR	3.01182e-12	-0.142469	0.13	0.263	5.26045e-08	granulo
ATP5MG	3.0648e-12	0.205609	0.813	0.702	5.35298e-08	granulo
YBX3	3.14726e-12	-0.160895	0.186	0.333	5.497e-08	granulo
MGAT1	3.29455e-12	-0.17915	0.351	0.521	5.75426e-08	granulo
PLEK	3.4793e-12	-0.139367	0.201	0.356	6.07695e-08	granulo
XRN1	6.96046e-12	-0.141103	0.147	0.283	1.21571e-07	granulo
CYSTM1	7.27378e-12	-0.133521	0.15	0.287	1.27044e-07	granulo
THEMIS2	7.374e-12	-0.147278	0.202	0.35	1.28794e-07	granulo
FRG1	8.67176e-12	-0.12556	0.099	0.216	1.51461e-07	granulo
AC092069.1	9.16318e-12	0.176982	0.102	0.004	1.60044e-07	granulo
ARF5	9.50029e-12	-0.146156	0.191	0.337	1.65932e-07	granulo
TIMP2	1.11379e-11	-0.127333	0.148	0.283	1.94534e-07	granulo
CHMP2A	1.19071e-11	-0.147508	0.228	0.382	2.0797e-07	granulo
SYNGR2	1.27863e-11	-0.129317	0.171	0.315	2.23326e-07	granulo
PILRA	1.60858e-11	-0.108966	0.115	0.24	2.80955e-07	granulo
LRPAP1	1.71286e-11	-0.11159	0.115	0.24	2.99169e-07	granulo
AREG	1.78306e-11	-0.198929	0.073	0.175	3.1143e-07	granulo
RIC1	1.79395e-11	-0.101365	0.093	0.207	3.13332e-07	granulo
KDM7A	1.81173e-11	-0.10452	0.096	0.212	3.16437e-07	granulo
ERP44	1.96213e-11	-0.114267	0.109	0.229	3.42705e-07	granulo
PPA1	2.05351e-11	-0.130562	0.194	0.343	3.58667e-07	granulo
EGLN1	2.13521e-11	-0.11267	0.094	0.207	3.72936e-07	granulo
DOCK8	2.28259e-11	-0.135519	0.263	0.425	3.98677e-07	granulo
CD302	2.35315e-11	-0.154343	0.209	0.352	4.11001e-07	granulo
DAZAP2	2.3794e-11	-0.157391	0.494	0.663	4.15586e-07	granulo
GAS7	2.47053e-11	-0.112052	0.106	0.225	4.31502e-07	granulo
MCRIP2	2.54584e-11	-0.106434	0.09	0.201	4.44657e-07	granulo
GNB2	2.6737e-11	-0.130384	0.196	0.343	4.66989e-07	granulo
TGFB1	2.73698e-11	-0.138024	0.223	0.376	4.78042e-07	granulo
CANX	2.80026e-11	-0.163022	0.332	0.492	4.89093e-07	granulo
SIGLEC10	3.08406e-11	-0.11676	0.12	0.244	5.38663e-07	granulo
ADM	3.17956e-11	-0.202632	0.271	0.425	5.55342e-07	granulo
SCPEP1	3.33791e-11	-0.108101	0.113	0.235	5.82999e-07	granulo
UQCR11	3.87344e-11	0.21449	0.841	0.765	6.76535e-07	granulo
CBX3	4.10463e-11	-0.146365	0.321	0.479	7.16915e-07	granulo
IDH3G	4.29315e-11	-0.1144	0.109	0.227	7.49842e-07	granulo
HBP1	4.40177e-11	-0.105496	0.102	0.218	7.68814e-07	granulo
DCXR	4.57647e-11	-0.10812	0.099	0.214	7.99326e-07	granulo
PRNP	4.70131e-11	-0.132149	0.133	0.259	8.21131e-07	granulo
IFIT2	4.8555e-11	-0.21737	0.245	0.387	8.48061e-07	granulo
JAK2	5.01932e-11	-0.109042	0.119	0.242	8.76674e-07	granulo
RNH1	5.09199e-11	-0.134659	0.206	0.352	8.89366e-07	granulo
RTN3	5.82575e-11	-0.114685	0.145	0.276	1.01753e-06	granulo
MEF2A	7.03857e-11	-0.130348	0.176	0.313	1.22936e-06	granulo
TMED7	7.47833e-11	-0.114117	0.12	0.24	1.30617e-06	granulo
GLRX	7.64227e-11	-0.212961	0.526	0.648	1.3348e-06	granulo
VOPP1	8.24502e-11	-0.101905	0.099	0.212	1.44007e-06	granulo
IRF8	8.96548e-11	-0.107163	0.104	0.218	1.56591e-06	granulo
PSMB1	9.13753e-11	-0.139889	0.241	0.391	1.59596e-06	granulo
IFI35	9.66376e-11	-0.144723	0.201	0.341	1.68787e-06	granulo
TMEM51	9.69986e-11	-0.108198	0.101	0.214	1.69418e-06	granulo
PFKFB4	9.72365e-11	-0.102549	0.07	0.168	1.69833e-06	granulo
WARS	1.12387e-10	-0.265522	0.507	0.616	1.96295e-06	granulo
RGS18	1.1677e-10	-0.118469	0.156	0.287	2.0395e-06	granulo
SRSF5	1.18107e-10	-0.133282	0.251	0.404	2.06286e-06	granulo
FAM162A	1.21148e-10	-0.218161	0.29	0.432	2.11597e-06	granulo
CD46	1.28265e-10	-0.104132	0.1	0.212	2.24028e-06	granulo
REEP5	1.28953e-10	-0.127946	0.195	0.337	2.2523e-06	granulo
ASGR2	1.29109e-10	-0.100063	0.067	0.162	2.25503e-06	granulo
GSTO1	1.44628e-10	-0.141801	0.368	0.533	2.52608e-06	granulo
VAMP8	1.45912e-10	-0.164088	0.756	0.881	2.5485e-06	granulo
NADK	1.48565e-10	-0.103088	0.083	0.186	2.59483e-06	granulo
PYURF	1.67701e-10	0.158081	0.3	0.156	2.92907e-06	granulo
HSPA6	1.69366e-10	-0.115499	0.157	0.289	2.95814e-06	granulo
TUBA1A	1.7028e-10	-0.173112	0.257	0.408	2.97411e-06	granulo
TMEM30A	1.70513e-10	-0.104857	0.107	0.22	2.97818e-06	granulo
NUP58	1.80135e-10	-0.136085	0.146	0.268	3.14624e-06	granulo
CASP4	2.18576e-10	-0.142848	0.349	0.512	3.81765e-06	granulo
RXRA	2.21232e-10	-0.101404	0.123	0.244	3.86403e-06	granulo
LMO4	2.44605e-10	-0.11425	0.117	0.233	4.27227e-06	granulo
SOD2	2.64477e-10	-0.160734	0.302	0.458	4.61936e-06	granulo
CHMP4B	2.66966e-10	-0.125759	0.183	0.317	4.66283e-06	granulo
SCAND1	2.73147e-10	-0.131294	0.259	0.408	4.77079e-06	granulo
MESD	2.75686e-10	-0.102876	0.088	0.192	4.81514e-06	granulo
NACA	3.03067e-10	0.185307	0.888	0.799	5.29336e-06	granulo
IL4I1	3.2198e-10	-0.106496	0.063	0.153	5.6237e-06	granulo
SLC7A7	3.26087e-10	-0.128213	0.201	0.337	5.69543e-06	granulo
LARP1	3.42811e-10	-0.125835	0.164	0.294	5.98753e-06	granulo
ATP6V0B	3.52748e-10	-0.149959	0.342	0.495	6.16109e-06	granulo
FPR1	3.5673e-10	-0.154651	0.384	0.54	6.23064e-06	granulo
CORO1C	3.56944e-10	-0.109096	0.135	0.257	6.23439e-06	granulo
TLN1	3.62413e-10	-0.152981	0.343	0.495	6.32991e-06	granulo
CTNNA1	3.782e-10	-0.103503	0.143	0.268	6.60564e-06	granulo
CFDP1	4.18523e-10	-0.110946	0.109	0.22	7.30992e-06	granulo
ATP6V1B2	4.52082e-10	-0.145663	0.245	0.384	7.89606e-06	granulo
PCMT1	5.20562e-10	-0.106768	0.108	0.218	9.09213e-06	granulo
MT2A	5.25251e-10	-0.437904	0.875	0.857	9.17404e-06	granulo
CLIC1	5.30222e-10	-0.167565	0.608	0.767	9.26085e-06	granulo
BASP1	6.01778e-10	-0.135523	0.13	0.246	1.05107e-05	granulo
ST13	6.21015e-10	-0.117304	0.179	0.313	1.08466e-05	granulo
SRSF4	6.51044e-10	-0.103873	0.136	0.257	1.13711e-05	granulo
IRF2BP2	6.68014e-10	-0.110189	0.191	0.328	1.16675e-05	granulo
LILRB3	7.03058e-10	-0.122924	0.254	0.402	1.22796e-05	granulo
CD48	7.04452e-10	-0.136706	0.224	0.363	1.2304e-05	granulo
TMCO1	7.5857e-10	-0.110143	0.145	0.268	1.32492e-05	granulo
CPVL	9.00778e-10	-0.124972	0.072	0.164	1.5733e-05	granulo
ATF4	9.17253e-10	-0.116558	0.173	0.302	1.60207e-05	granulo
LTA4H	9.31119e-10	-0.162361	0.191	0.317	1.62629e-05	granulo
ANXA1	9.70136e-10	-0.133887	0.372	0.538	1.69444e-05	granulo
TYMS	9.72726e-10	-0.15807	0.015	0.067	1.69896e-05	granulo
ABI1	9.77358e-10	-0.103832	0.106	0.214	1.70705e-05	granulo
PSMD8	1.02918e-09	-0.119665	0.138	0.257	1.79757e-05	granulo
UBXN4	1.03901e-09	-0.120111	0.209	0.348	1.81473e-05	granulo
PPP1CB	1.0717e-09	0.32737	0.467	0.348	1.87183e-05	granulo
NCL	1.18397e-09	-0.13523	0.238	0.38	2.06792e-05	granulo
SNX6	1.1931e-09	-0.133486	0.251	0.393	2.08387e-05	granulo
IFNAR1	1.21865e-09	-0.101713	0.15	0.274	2.12849e-05	granulo
NCOR1	1.22026e-09	-0.110211	0.113	0.222	2.13131e-05	granulo
SORL1	1.41319e-09	-0.112403	0.115	0.225	2.46827e-05	granulo
DNAJC8	1.4921e-09	-0.109096	0.128	0.242	2.60611e-05	granulo
PLP2	1.58143e-09	-0.120225	0.169	0.294	2.76212e-05	granulo
PDIA6	1.60218e-09	-0.131801	0.27	0.415	2.79836e-05	granulo
BHLHE40	1.60761e-09	-0.102106	0.093	0.194	2.80785e-05	granulo
CDC42SE1	1.60994e-09	0.265082	0.266	0.14	2.81193e-05	granulo
DENND5A	1.79476e-09	-0.1074	0.12	0.231	3.13472e-05	granulo
ASAH1	1.8437e-09	-0.132608	0.302	0.451	3.2202e-05	granulo
LMAN2	1.94702e-09	-0.114976	0.17	0.296	3.40067e-05	granulo
MGST3	1.98392e-09	-0.111352	0.143	0.261	3.46511e-05	granulo
RTN4	2.05775e-09	-0.13645	0.404	0.559	3.59406e-05	granulo
CSGALNACT2	2.05916e-09	-0.129432	0.213	0.348	3.59653e-05	granulo
CD81	2.15895e-09	-0.13538	0.192	0.317	3.77082e-05	granulo
TMEM59	2.58112e-09	-0.115079	0.262	0.408	4.50818e-05	granulo
IRF7	2.76122e-09	-0.157568	0.271	0.404	4.82274e-05	granulo
DAD1	2.89031e-09	-0.109862	0.206	0.341	5.04822e-05	granulo
MYO1G	2.96338e-09	-0.117644	0.191	0.322	5.17584e-05	granulo
STAG2	3.16262e-09	-0.103548	0.152	0.272	5.52382e-05	granulo
TAGLN2	3.24076e-09	-0.130347	0.215	0.348	5.66031e-05	granulo
GNB1	3.48104e-09	-0.124506	0.255	0.395	6.07998e-05	granulo
F13A1	3.51172e-09	0.131818	0.164	0.056	6.13356e-05	granulo
PPP4C	3.51807e-09	-0.117474	0.228	0.363	6.14466e-05	granulo
RNASE2	3.53962e-09	-0.114251	0.062	0.145	6.18231e-05	granulo
CHMP3	4.04707e-09	-0.104842	0.16	0.281	7.06861e-05	granulo
CYBB	4.07877e-09	-0.164079	0.561	0.7	7.12399e-05	granulo
LPCAT2	4.17372e-09	-0.106201	0.162	0.283	7.28982e-05	granulo
ACSL4	4.69448e-09	-0.109438	0.138	0.251	8.19938e-05	granulo
MSRB1	5.19921e-09	-0.10974	0.178	0.302	9.08095e-05	granulo
EMP3	5.48971e-09	-0.120921	0.505	0.67	9.58832e-05	granulo
NMI	5.49694e-09	-0.111667	0.219	0.354	9.60096e-05	granulo
S100A9	5.50795e-09	-0.402444	0.958	0.927	9.62018e-05	granulo
CNIH4	5.79483e-09	-0.162426	0.385	0.523	0.000101212	granulo
ZNF524	5.80661e-09	-0.100335	0.096	0.194	0.000101418	granulo
SLC38A2	5.93876e-09	-0.124674	0.244	0.38	0.000103726	granulo
PDIA4	6.08289e-09	-0.122194	0.161	0.279	0.000106244	granulo
AQP9	6.39185e-09	-0.130679	0.26	0.397	0.00011164	granulo
LGALS1	6.5772e-09	-0.189963	0.917	0.929	0.000114877	granulo
TOMM7	7.12004e-09	0.200496	0.714	0.626	0.000124359	granulo
GZMK	7.15068e-09	-0.199752	0.011	0.054	0.000124894	granulo
BNIP3L	7.35508e-09	-0.20416	0.602	0.717	0.000128464	granulo
C4orf3	7.62112e-09	0.181996	0.928	0.866	0.00013311	granulo
HMGN2	7.83505e-09	-0.182384	0.424	0.572	0.000136847	granulo
TNFRSF1A	7.94314e-09	-0.110122	0.201	0.328	0.000138735	granulo
BLOC1S6	8.24771e-09	-0.10629	0.173	0.296	0.000144055	granulo
NDFIP1	8.54989e-09	-0.104842	0.159	0.276	0.000149332	granulo
GNAS	1.0766e-08	-0.109368	0.199	0.326	0.000188038	granulo
PGD	1.16853e-08	-0.113948	0.214	0.341	0.000204095	granulo
MCL1	1.1887e-08	-0.156278	0.478	0.624	0.000207618	granulo
VDAC2	1.19341e-08	-0.109482	0.191	0.315	0.000208442	granulo
GSTP1	1.25447e-08	-0.154662	0.372	0.505	0.000219105	granulo
MTRNR2L1	1.34791e-08	0.106017	0.164	0.06	0.000235426	granulo
FOXN3	1.34851e-08	-0.107918	0.16	0.276	0.000235531	granulo
NAMPT	1.36012e-08	-0.288375	0.573	0.695	0.000237559	granulo
PIK3CB	1.40847e-08	-0.110148	0.157	0.272	0.000246003	granulo
UQCRC1	1.46106e-08	-0.103708	0.138	0.246	0.000255188	granulo
LRRC25	1.48069e-08	-0.119303	0.204	0.328	0.000258617	granulo
RAB8A	1.65387e-08	-0.105335	0.181	0.302	0.000288866	granulo
FMNL1	1.72898e-08	-0.101666	0.129	0.235	0.000301984	granulo
DDX24	1.81644e-08	-0.113869	0.16	0.274	0.00031726	granulo
ST8SIA4	1.83246e-08	-0.121705	0.207	0.328	0.000320057	granulo
AP2M1	1.87302e-08	-0.103185	0.156	0.27	0.000327141	granulo
PRKAG2	1.89338e-08	-0.102293	0.133	0.24	0.000330698	granulo
RGS10	1.90214e-08	-0.112971	0.399	0.555	0.000332229	granulo
SNRPD3	1.95233e-08	-0.100489	0.141	0.251	0.000340994	granulo
POLR2L	2.01603e-08	0.184915	0.474	0.339	0.000352119	granulo
XAF1	2.12004e-08	-0.106921	0.252	0.389	0.000370287	granulo
TKT	2.36286e-08	-0.109476	0.256	0.389	0.000412696	granulo
EIF3J	2.3721e-08	-0.10794	0.128	0.231	0.000414311	granulo
SDCBP	2.38613e-08	-0.114328	0.475	0.639	0.000416762	granulo
CAPNS1	2.39708e-08	-0.107942	0.238	0.371	0.000418674	granulo
OGFRL1	2.68181e-08	-0.105205	0.188	0.309	0.000468405	granulo
LAPTM4A	2.7411e-08	-0.136916	0.272	0.395	0.000478761	granulo
PSMB8	2.86318e-08	-0.11389	0.326	0.469	0.000500083	granulo
LDHA	2.89909e-08	-0.114701	0.713	0.838	0.000506356	granulo
HNRNPK	3.63462e-08	-0.124866	0.381	0.531	0.000634822	granulo
FGR	3.8169e-08	-0.116683	0.302	0.438	0.00066666	granulo
SHOC2	4.00956e-08	-0.106044	0.212	0.337	0.00070031	granulo
CD8A	4.02551e-08	-0.109667	0.012	0.054	0.000703095	granulo
YBX1	4.04928e-08	-0.111791	0.635	0.765	0.000707247	granulo
FOSL2	4.07612e-08	-0.113146	0.183	0.3	0.000711935	granulo
CIR1	5.06581e-08	-0.101539	0.191	0.311	0.000884794	granulo
DPP7	5.19647e-08	-0.100335	0.098	0.188	0.000907615	granulo
SEC61G	5.57206e-08	0.201556	0.803	0.739	0.000973216	granulo
COX5A	5.77875e-08	-0.12248	0.275	0.404	0.00100932	granulo
SMCHD1	5.8508e-08	-0.101609	0.154	0.263	0.0010219	granulo
ACTG1	6.13655e-08	-0.207615	0.733	0.81	0.00107181	granulo
RAB2A	6.20368e-08	-0.10011	0.194	0.315	0.00108353	granulo
HLA-DPA1	6.81159e-08	-0.213837	0.705	0.832	0.00118971	granulo
ANXA5	6.9802e-08	-0.118346	0.313	0.447	0.00121916	granulo
RCSD1	7.05984e-08	-0.104287	0.217	0.339	0.00123307	granulo
ARL6IP1	7.14706e-08	-0.105544	0.172	0.283	0.00124831	granulo
TMED10	7.14716e-08	-0.1052	0.219	0.341	0.00124832	granulo
IFNGR1	7.31413e-08	-0.12749	0.331	0.467	0.00127749	granulo
PTPN1	7.47674e-08	-0.106875	0.165	0.274	0.00130589	granulo
ARHGDIA	7.55136e-08	-0.10557	0.262	0.393	0.00131892	granulo
EEF1D	7.63492e-08	0.153167	0.865	0.797	0.00133352	granulo
UPP1	7.74114e-08	-0.160731	0.42	0.549	0.00135207	granulo
FAM96A	7.95354e-08	-0.107182	0.222	0.346	0.00138916	granulo
XRCC5	8.35205e-08	-0.104156	0.154	0.261	0.00145877	granulo
SYK	8.47902e-08	-0.102522	0.209	0.328	0.00148095	granulo
JUND	8.69323e-08	-0.13523	0.256	0.376	0.00151836	granulo
GNAQ	8.89385e-08	0.149813	0.368	0.248	0.0015534	granulo
KRTCAP2	9.35841e-08	-0.115262	0.235	0.356	0.00163454	granulo
CAST	9.42436e-08	-0.111675	0.327	0.464	0.00164606	granulo
PAIP2	9.77479e-08	-0.105903	0.25	0.378	0.00170726	granulo
GK	1.0117e-07	-0.131286	0.281	0.406	0.00176703	granulo
UBE2R2	1.06188e-07	-0.119508	0.236	0.356	0.00185468	granulo
PTTG1IP	1.08562e-07	-0.11082	0.269	0.397	0.00189615	granulo
RRM2	1.12255e-07	-0.144726	0.014	0.056	0.00196064	granulo
KLF4	1.15897e-07	-0.10317	0.132	0.233	0.00202425	granulo
EPSTI1	1.19998e-07	-0.167438	0.481	0.581	0.00209588	granulo
ATP5MC3	1.23803e-07	-0.138467	0.359	0.488	0.00216234	granulo
CORO1A	1.29004e-07	-0.244423	0.37	0.488	0.00225318	granulo
PRDX1	1.42834e-07	-0.100553	0.156	0.261	0.00249475	granulo
ATP1B3	1.43575e-07	-0.113866	0.234	0.352	0.00250768	granulo
AGFG1	1.45229e-07	-0.123861	0.265	0.387	0.00253657	granulo
UBL5	1.48955e-07	0.178479	0.714	0.657	0.00260166	granulo
FYN	1.52373e-07	-0.104683	0.15	0.255	0.00266135	granulo
CHMP5	1.67682e-07	-0.10454	0.185	0.296	0.00292873	granulo
CIB1	1.72258e-07	-0.102522	0.202	0.317	0.00300867	granulo
FYB1	1.96276e-07	-0.131789	0.63	0.767	0.00342815	granulo
CCL3	2.05601e-07	-0.178197	0.01	0.048	0.00359102	granulo
ERO1A	2.1202e-07	-0.134008	0.386	0.514	0.00370313	granulo
ANP32B	2.20427e-07	-0.142965	0.254	0.371	0.00384998	granulo
SLC11A1	2.28633e-07	-0.172898	0.421	0.531	0.00399331	granulo
NOP10	2.87682e-07	0.189502	0.607	0.544	0.00502466	granulo
DRAP1	2.96977e-07	-0.108045	0.423	0.568	0.005187	granulo
SERPINB1	3.00863e-07	-0.107653	0.415	0.553	0.00525487	granulo
NOP53	3.05253e-07	-0.103386	0.225	0.341	0.00533154	granulo
CACYBP	3.10242e-07	-0.105787	0.085	0.164	0.00541869	granulo
GHITM	3.12019e-07	-0.112762	0.178	0.283	0.00544972	granulo
MT1X	3.91748e-07	-0.675642	0.277	0.376	0.00684226	granulo
ATF5	3.93117e-07	-0.210163	0.369	0.471	0.00686618	granulo
HINT1	3.97216e-07	0.138223	0.466	0.337	0.00693778	granulo
LGALS8	4.1969e-07	-0.106376	0.191	0.298	0.00733031	granulo
ZYX	4.28864e-07	-0.129128	0.325	0.441	0.00749053	granulo
ISG15	4.83458e-07	-0.246786	0.677	0.743	0.00844407	granulo
FLOT1	5.21891e-07	-0.106744	0.201	0.309	0.00911535	granulo
PPP1CA	6.26968e-07	-0.120442	0.265	0.378	0.0109506	granulo
HNRNPC	6.69749e-07	-0.112378	0.271	0.389	0.0116978	granulo
KTN1	6.8831e-07	-0.110158	0.209	0.317	0.012022	granulo
GCA	7.42184e-07	-0.109552	0.465	0.594	0.012963	granulo
SH3GLB1	7.6546e-07	-0.121917	0.292	0.406	0.0133695	granulo
FGD2	7.73995e-07	0.241165	0.246	0.147	0.0135186	granulo
TIMP1	7.77684e-07	-0.204779	0.781	0.834	0.013583	granulo
SNRPB	9.09391e-07	-0.108752	0.194	0.302	0.0158834	granulo
LY6E	9.24786e-07	-0.138446	0.686	0.775	0.0161523	granulo
CCNL1	9.40291e-07	-0.111368	0.226	0.335	0.0164231	granulo
IFI27	9.85955e-07	-0.249498	0.089	0.166	0.0172207	granulo
NSA2	1.02305e-06	-0.10351	0.169	0.268	0.0178687	granulo
IQGAP1	1.10716e-06	-0.120681	0.378	0.499	0.0193377	granulo
CTNNB1	1.12814e-06	0.21374	0.246	0.147	0.0197042	granulo
DDX21	1.15704e-06	-0.129183	0.286	0.397	0.0202089	granulo
PRDX5	1.161e-06	-0.117028	0.299	0.417	0.020278	granulo
COPS9	1.204e-06	0.145617	0.385	0.272	0.0210291	granulo
TPP1	1.24604e-06	-0.111062	0.291	0.404	0.0217634	granulo
H2AFZ	1.35123e-06	-0.145051	0.41	0.523	0.0236005	granulo
BLOC1S1	1.39899e-06	-0.112282	0.593	0.715	0.0244347	granulo
CSF3R	1.4051e-06	-0.110816	0.413	0.536	0.0245415	granulo
HNRNPDL	1.41163e-06	-0.109444	0.404	0.542	0.0246555	granulo
EIF3E	1.5474e-06	0.142546	0.407	0.298	0.0270269	granulo
TXNIP	1.58475e-06	-0.167404	0.685	0.771	0.0276792	granulo
HLA-DRB5	1.85811e-06	0.100159	0.068	0.011	0.0324538	granulo
HLA-DPB1	2.74228e-06	-0.161643	0.763	0.886	0.0478966	granulo
B2M	5.8554e-52	-0.771469	1	1	1.0227e-47	NK
HLA-A	1.56484e-45	-0.958914	0.749	1	2.73315e-41	NK
UBC	5.92593e-37	-0.666674	0.246	0.797	1.03502e-32	NK
HLA-C	3.35108e-36	-0.721466	0.809	1	5.853e-32	NK
LCK	2.27405e-35	-0.566085	0.17	0.695	3.97185e-31	NK
TRAC	2.85383e-35	-0.956176	0.389	0.873	4.98449e-31	NK
LSP1	4.88752e-33	-0.570957	0.182	0.678	8.53654e-29	NK
IL2RG	8.77924e-33	-0.496483	0.147	0.636	1.53338e-28	NK
MYL12B	1.00574e-31	-0.600024	0.314	0.847	1.75663e-27	NK
UBB	1.63399e-31	-0.656925	0.306	0.788	2.85393e-27	NK
IL32	3.13582e-31	-0.834194	0.611	0.941	5.47702e-27	NK
CXCR4	2.19672e-29	-0.730043	0.335	0.831	3.8368e-25	NK
ARHGDIB	7.59386e-28	-0.599023	0.567	0.941	1.32634e-23	NK
ANXA6	1.92686e-27	-0.325899	0.053	0.39	3.36545e-23	NK
ITGB7	8.89043e-27	-0.266319	0.032	0.322	1.5528e-22	NK
MYL12A	9.76441e-26	-0.564547	0.598	0.975	1.70545e-21	NK
CD52	1.35667e-25	-0.69071	0.885	0.992	2.36957e-21	NK
PRDX1	1.81104e-25	-0.32834	0.079	0.441	3.16317e-21	NK
HSPA8	6.84512e-25	-0.569782	0.496	0.915	1.19557e-20	NK
ANXA5	1.05043e-24	-0.335863	0.057	0.373	1.83468e-20	NK
DDX5	2.10158e-24	-0.579383	0.373	0.805	3.67062e-20	NK
HLA-B	2.34306e-24	-0.535238	0.938	0.975	4.09239e-20	NK
COPZ1	3.93861e-24	-0.230759	0.021	0.263	6.87918e-20	NK
PGK1	4.37878e-24	-0.418017	0.143	0.559	7.64797e-20	NK
CORO1A	6.18166e-23	-0.647971	0.491	0.881	1.07969e-18	NK
SRSF5	2.27834e-22	-0.461014	0.224	0.653	3.97934e-18	NK
EEF2	3.199e-22	-0.566492	0.514	0.856	5.58736e-18	NK
PSMA5	3.85988e-22	-0.293643	0.096	0.449	6.74167e-18	NK
CD3D	9.87027e-22	-0.558063	0.506	0.907	1.72394e-17	NK
CD3E	1.50354e-21	-0.395487	0.263	0.72	2.62608e-17	NK
PUF60	2.08375e-21	-0.231233	0.032	0.28	3.63948e-17	NK
EIF3D	3.63239e-21	-0.344592	0.135	0.508	6.34433e-17	NK
CD69	3.78115e-21	-0.506907	0.211	0.593	6.60415e-17	NK
HDAC1	6.5911e-21	-0.229424	0.026	0.254	1.1512e-16	NK
UCP2	1.15115e-20	-0.411865	0.165	0.551	2.01059e-16	NK
SEPT7	2.51476e-20	-0.45709	0.245	0.636	4.39229e-16	NK
ECH1	6.54126e-20	-0.28559	0.081	0.39	1.1425e-15	NK
GZMK	8.46797e-20	-0.834286	0.16	0.492	1.47902e-15	NK
JUN	1.44241e-19	-0.339349	0.042	0.288	2.51931e-15	NK
EEF1A1	2.4616e-19	-0.453512	1	1	4.29943e-15	NK
TRBC2	5.44514e-19	-0.648047	0.274	0.636	9.51048e-15	NK
APOBEC3G	6.6429e-19	-0.428282	0.169	0.525	1.16025e-14	NK
ATP5F1A	8.91074e-19	-0.395346	0.167	0.517	1.55635e-14	NK
RAB34	1.18988e-18	-0.13712	0.005	0.153	2.07825e-14	NK
ACTB	1.19477e-18	-0.608505	0.974	1	2.08679e-14	NK
CFL1	2.93923e-18	-0.491617	0.616	0.907	5.13366e-14	NK
HNRNPM	5.61114e-18	-0.294938	0.102	0.415	9.80041e-14	NK
ICAM3	6.81642e-18	-0.346127	0.139	0.475	1.19056e-13	NK
PDCD6	8.62166e-18	-0.276548	0.104	0.415	1.50586e-13	NK
ATP5F1B	1.16345e-17	-0.310209	0.112	0.424	2.03207e-13	NK
HNRNPA2B1	1.25525e-17	-0.426025	0.253	0.627	2.19242e-13	NK
MTRNR2L8	1.30827e-17	-0.442117	0.34	0.729	2.28503e-13	NK
MYO1F	2.73068e-17	-0.330804	0.183	0.551	4.76941e-13	NK
PFN1	3.18768e-17	-0.497684	0.848	0.992	5.5676e-13	NK
ANXA1	5.6791e-17	-0.426436	0.298	0.669	9.91912e-13	NK
DDIT4	6.12909e-17	-0.520912	0.3	0.661	1.07051e-12	NK
AP2M1	6.91626e-17	-0.252852	0.076	0.347	1.20799e-12	NK
ARHGAP15	7.08569e-17	-0.259207	0.109	0.415	1.23759e-12	NK
XRCC6	7.11305e-17	-0.214835	0.06	0.314	1.24237e-12	NK
DBNL	7.15056e-17	-0.249428	0.062	0.314	1.24892e-12	NK
CD53	7.2413e-17	-0.347248	0.206	0.568	1.26476e-12	NK
CAPZB	8.09937e-17	-0.349236	0.173	0.517	1.41464e-12	NK
ABHD14B	9.34348e-17	-0.191986	0.041	0.263	1.63193e-12	NK
VIM	9.5164e-17	-0.493648	0.504	0.873	1.66213e-12	NK
TRAF3IP3	9.5531e-17	-0.328126	0.172	0.517	1.66854e-12	NK
PSMB3	9.66431e-17	-0.289552	0.094	0.381	1.68797e-12	NK
MYL6	1.06371e-16	-0.513125	0.682	0.915	1.85788e-12	NK
HCLS1	1.40656e-16	-0.274937	0.118	0.432	2.45669e-12	NK
TMBIM6	1.79337e-16	-0.342366	0.17	0.517	3.1323e-12	NK
ANXA11	1.92179e-16	-0.276701	0.083	0.356	3.3566e-12	NK
ARF1	2.38856e-16	-0.269288	0.123	0.441	4.17185e-12	NK
FKBP3	2.5306e-16	-0.200665	0.042	0.263	4.41995e-12	NK
TMEM59	3.01691e-16	-0.319715	0.162	0.5	5.26933e-12	NK
PSMB1	3.04265e-16	-0.344105	0.175	0.508	5.31429e-12	NK
CAP1	3.29673e-16	-0.337814	0.198	0.551	5.75807e-12	NK
SOD1	3.47562e-16	-0.335877	0.217	0.585	6.07052e-12	NK
DNAJC8	3.65334e-16	-0.270768	0.099	0.39	6.38092e-12	NK
RRAGA	4.49437e-16	-0.169723	0.023	0.203	7.84987e-12	NK
XRCC5	5.8233e-16	-0.247511	0.102	0.398	1.0171e-11	NK
EIF4A2	6.0155e-16	-0.336254	0.248	0.627	1.05067e-11	NK
ACTR3	7.17258e-16	-0.313088	0.18	0.525	1.25276e-11	NK
SKP1	7.77469e-16	-0.403728	0.301	0.644	1.35793e-11	NK
IGBP1	8.12521e-16	-0.270853	0.083	0.347	1.41915e-11	NK
COPE	8.42696e-16	-0.321603	0.154	0.475	1.47185e-11	NK
TUBA4A	9.89135e-16	-0.291519	0.126	0.432	1.72762e-11	NK
MDH1	1.06248e-15	-0.212148	0.057	0.297	1.85572e-11	NK
MTRNR2L10	1.90609e-15	-0.302887	0.149	0.466	3.32918e-11	NK
BTG1	2.20979e-15	-0.440571	0.431	0.814	3.85962e-11	NK
HNRNPF	3.21255e-15	-0.326888	0.139	0.441	5.61104e-11	NK
MVP	4.09665e-15	-0.158691	0.028	0.212	7.1552e-11	NK
EVL	5.03954e-15	-0.402009	0.28	0.636	8.80206e-11	NK
AC114760.2	5.40182e-15	-0.257825	0.092	0.364	9.43482e-11	NK
NDUFS2	5.92369e-15	-0.163404	0.023	0.195	1.03463e-10	NK
OSTF1	6.48166e-15	-0.276401	0.118	0.407	1.13209e-10	NK
EMP3	7.87743e-15	-0.395487	0.415	0.771	1.37587e-10	NK
ACAP1	7.90237e-15	-0.331499	0.23	0.585	1.38023e-10	NK
FDFT1	9.43306e-15	-0.210366	0.042	0.246	1.64758e-10	NK
DAD1	9.51484e-15	-0.321543	0.183	0.508	1.66186e-10	NK
FAU	1.00412e-14	0.371461	0.998	1	1.7538e-10	NK
TRAT1	1.15763e-14	-0.223574	0.066	0.305	2.02192e-10	NK
CLIC1	1.25434e-14	-0.436027	0.4	0.746	2.19083e-10	NK
JUNB	1.29099e-14	-0.407095	0.096	0.356	2.25484e-10	NK
C1QBP	1.36534e-14	-0.225588	0.083	0.339	2.38469e-10	NK
POLR2G	1.66951e-14	-0.214319	0.075	0.322	2.91597e-10	NK
SAP18	1.76393e-14	-0.312719	0.235	0.585	3.08087e-10	NK
PPP1CA	1.79808e-14	-0.325334	0.209	0.542	3.14053e-10	NK
MGST3	2.40961e-14	-0.248267	0.083	0.331	4.20863e-10	NK
ITM2C	2.50095e-14	-0.242889	0.044	0.246	4.36815e-10	NK
SELENOT	2.76578e-14	-0.280399	0.122	0.407	4.83071e-10	NK
BUB3	2.79549e-14	-0.230796	0.128	0.424	4.8826e-10	NK
ANXA7	2.80729e-14	-0.201093	0.047	0.254	4.90321e-10	NK
TNFAIP8	3.63071e-14	-0.254507	0.088	0.339	6.3414e-10	NK
STK17A	3.80949e-14	-0.360344	0.159	0.449	6.65366e-10	NK
PPP2CA	3.97693e-14	-0.186829	0.053	0.271	6.9461e-10	NK
ITPA	4.0838e-14	-0.164093	0.034	0.22	7.13276e-10	NK
CALM2	4.68059e-14	-0.366606	0.319	0.669	8.17512e-10	NK
S1PR4	4.86391e-14	-0.298457	0.156	0.458	8.49531e-10	NK
TRAPPC4	4.90546e-14	-0.19142	0.044	0.246	8.56788e-10	NK
FUT7	5.46991e-14	-0.120693	0.005	0.119	9.55374e-10	NK
TALDO1	5.84515e-14	-0.254346	0.076	0.314	1.02091e-09	NK
SPOCK2	6.04419e-14	-0.342941	0.175	0.483	1.05568e-09	NK
CST7	6.1118e-14	-0.35318	0.186	0.5	1.06749e-09	NK
ITM2B	6.19493e-14	-0.352556	0.355	0.712	1.08201e-09	NK
PSMD8	6.20417e-14	-0.26789	0.107	0.373	1.08362e-09	NK
DOK2	6.86651e-14	-0.263488	0.099	0.356	1.1993e-09	NK
PIM1	6.8832e-14	-0.308164	0.141	0.432	1.20222e-09	NK
NSMCE1	7.57414e-14	-0.206502	0.06	0.28	1.3229e-09	NK
LINC00513	8.34191e-14	-0.17258	0.029	0.203	1.457e-09	NK
RAN	1.16546e-13	-0.307392	0.246	0.585	2.03559e-09	NK
ANXA2	1.18596e-13	-0.325784	0.185	0.483	2.0714e-09	NK
CD48	1.33838e-13	-0.329313	0.297	0.653	2.33762e-09	NK
NUDT5	1.41632e-13	-0.201932	0.057	0.271	2.47374e-09	NK
IMP3	1.45087e-13	-0.247025	0.086	0.331	2.53408e-09	NK
SDHC	1.56623e-13	-0.219707	0.062	0.28	2.73557e-09	NK
GHITM	1.63399e-13	-0.22144	0.089	0.339	2.85392e-09	NK
LAT	1.90518e-13	-0.295615	0.18	0.483	3.32758e-09	NK
GIMAP7	2.20296e-13	-0.397433	0.391	0.72	3.84769e-09	NK
BIN1	2.47855e-13	-0.27221	0.113	0.373	4.32903e-09	NK
CIB1	2.5413e-13	-0.307111	0.224	0.551	4.43863e-09	NK
MYO1G	2.5958e-13	-0.272338	0.081	0.314	4.53382e-09	NK
RAP1B	2.66974e-13	-0.300111	0.229	0.551	4.66296e-09	NK
VPS51	2.75772e-13	-0.191986	0.037	0.22	4.81663e-09	NK
PABPC1	2.9502e-13	-0.399771	0.517	0.839	5.15283e-09	NK
CCT7	3.24122e-13	-0.21819	0.063	0.28	5.66112e-09	NK
ARL6IP5	3.29496e-13	-0.29882	0.191	0.5	5.75497e-09	NK
PPA1	3.30755e-13	-0.271997	0.151	0.441	5.77697e-09	NK
SH3BP1	3.37948e-13	-0.170092	0.037	0.22	5.9026e-09	NK
CCNDBP1	5.7258e-13	-0.260521	0.086	0.322	1.00007e-08	NK
CCT6A	6.21909e-13	-0.202344	0.068	0.288	1.08623e-08	NK
M6PR	6.38325e-13	-0.203856	0.06	0.271	1.1149e-08	NK
TMEM63A	6.57856e-13	-0.160259	0.029	0.195	1.14901e-08	NK
UQCRC2	6.83923e-13	-0.228032	0.107	0.364	1.19454e-08	NK
EZR	8.22408e-13	-0.260607	0.1	0.347	1.43642e-08	NK
NCR3	8.30198e-13	-0.185252	0.036	0.212	1.45002e-08	NK
LDHB	8.69888e-13	-0.361552	0.41	0.754	1.51935e-08	NK
CXCR3	8.70376e-13	-0.270836	0.089	0.322	1.5202e-08	NK
VDAC3	8.85402e-13	-0.183243	0.053	0.254	1.54644e-08	NK
CTSH	1.10021e-12	-0.182029	0.024	0.178	1.92162e-08	NK
CCT4	1.25238e-12	-0.181832	0.065	0.28	2.1874e-08	NK
AOAH	1.28233e-12	-0.156476	0.011	0.136	2.23971e-08	NK
RNASET2	1.35136e-12	-0.2191	0.089	0.331	2.36028e-08	NK
ENO1	1.37104e-12	-0.363508	0.305	0.636	2.39466e-08	NK
SLC3A2	1.47702e-12	-0.152474	0.024	0.178	2.57977e-08	NK
RAC2	1.49711e-12	-0.314617	0.288	0.61	2.61486e-08	NK
EIF3L	1.51871e-12	-0.307111	0.232	0.542	2.65257e-08	NK
PDIA6	1.58353e-12	-0.226341	0.1	0.347	2.76579e-08	NK
ARHGAP9	1.63431e-12	-0.181021	0.028	0.186	2.85449e-08	NK
SELL	2.04371e-12	-0.315187	0.112	0.356	3.56955e-08	NK
PARP1	2.34512e-12	-0.22226	0.1	0.347	4.09599e-08	NK
PDIA3	2.41276e-12	-0.244162	0.141	0.415	4.21413e-08	NK
PDHB	2.48117e-12	-0.190929	0.049	0.237	4.33362e-08	NK
BIN2	2.53185e-12	-0.302223	0.185	0.475	4.42214e-08	NK
RNH1	2.73509e-12	-0.183243	0.052	0.246	4.7771e-08	NK
ZAP70	2.77225e-12	-0.221799	0.068	0.28	4.84201e-08	NK
ADH5	2.88223e-12	-0.143867	0.034	0.203	5.03409e-08	NK
PPIB	3.22603e-12	-0.26422	0.235	0.559	5.63458e-08	NK
DDOST	3.31765e-12	-0.191904	0.06	0.263	5.7946e-08	NK
SCP2	4.20952e-12	-0.199939	0.092	0.331	7.35236e-08	NK
CAPG	4.46348e-12	-0.174762	0.039	0.212	7.79592e-08	NK
EMC7	4.67622e-12	-0.17258	0.06	0.263	8.16749e-08	NK
HSP90AA1	4.80047e-12	-0.29088	0.342	0.72	8.38451e-08	NK
LAPTM4A	5.57759e-12	-0.162358	0.045	0.229	9.74182e-08	NK
EIF4A3	5.62571e-12	-0.153242	0.029	0.186	9.82587e-08	NK
CCT5	8.47435e-12	-0.172271	0.047	0.229	1.48013e-07	NK
EIF6	8.9359e-12	-0.190381	0.058	0.254	1.56074e-07	NK
KARS	9.26156e-12	-0.181832	0.07	0.28	1.61762e-07	NK
RAB18	9.56752e-12	-0.215286	0.092	0.322	1.67106e-07	NK
FLT3LG	1.00608e-11	-0.234237	0.107	0.347	1.75723e-07	NK
RHOA	1.04754e-11	-0.279496	0.188	0.475	1.82963e-07	NK
VSIR	1.10176e-11	-0.242459	0.086	0.305	1.92433e-07	NK
CDC123	1.10637e-11	-0.166992	0.041	0.212	1.93239e-07	NK
CCSER2	1.13094e-11	-0.19135	0.066	0.271	1.9753e-07	NK
TKT	1.24131e-11	-0.174096	0.055	0.246	2.16806e-07	NK
PRMT1	1.30737e-11	-0.165659	0.034	0.195	2.28345e-07	NK
REEP5	1.35324e-11	-0.2237	0.113	0.356	2.36356e-07	NK
SEPT1	1.41834e-11	-0.222633	0.091	0.314	2.47728e-07	NK
ATP6V0D1	1.48424e-11	-0.157125	0.031	0.186	2.59237e-07	NK
PRDX2	1.59566e-11	-0.220544	0.107	0.347	2.78698e-07	NK
S100A4	1.61447e-11	-0.479554	0.959	0.966	2.81984e-07	NK
ATP6AP2	1.68734e-11	-0.165236	0.055	0.246	2.94711e-07	NK
KLHDC2	1.70493e-11	-0.175964	0.049	0.229	2.97784e-07	NK
PSMC4	1.71485e-11	-0.14304	0.031	0.186	2.99515e-07	NK
TCEAL8	1.75645e-11	-0.145423	0.037	0.203	3.06782e-07	NK
JAML	1.8014e-11	-0.228311	0.073	0.28	3.14632e-07	NK
HNRNPA0	2.31143e-11	-0.185491	0.11	0.356	4.03715e-07	NK
IL16	2.45018e-11	-0.198256	0.073	0.28	4.27948e-07	NK
SEPT6	2.46728e-11	-0.211057	0.131	0.39	4.30936e-07	NK
WAS	2.4879e-11	-0.175853	0.076	0.288	4.34537e-07	NK
CACYBP	2.60465e-11	-0.19175	0.089	0.314	4.54929e-07	NK
ATP5F1E	2.72178e-11	0.368621	0.99	0.958	4.75387e-07	NK
GPR183	2.73372e-11	-0.260892	0.123	0.373	4.77472e-07	NK
PSMB8	2.9019e-11	-0.323393	0.238	0.517	5.06847e-07	NK
TSPO	2.94299e-11	-0.237459	0.147	0.415	5.14023e-07	NK
SNRPB2	3.02296e-11	-0.211057	0.136	0.398	5.2799e-07	NK
LTB	3.03792e-11	-0.723366	0.485	0.737	5.30603e-07	NK
EIF2S1	3.07635e-11	-0.148586	0.049	0.229	5.37315e-07	NK
ERP29	3.17429e-11	-0.273005	0.22	0.508	5.54421e-07	NK
PPP4C	3.29023e-11	-0.216751	0.092	0.314	5.74672e-07	NK
RNF167	3.84104e-11	-0.190868	0.062	0.254	6.70875e-07	NK
SLC25A6	4.02507e-11	-0.331654	0.571	0.839	7.03019e-07	NK
JAK1	4.38663e-11	-0.236799	0.211	0.508	7.66168e-07	NK
FNTA	4.47479e-11	-0.18378	0.058	0.246	7.81567e-07	NK
TRMT112	4.53236e-11	-0.249405	0.243	0.551	7.91623e-07	NK
HNRNPC	4.58839e-11	-0.247376	0.206	0.5	8.01408e-07	NK
ACTG1	5.28582e-11	-0.471722	0.668	0.881	9.23221e-07	NK
RUVBL1	5.33071e-11	-0.130034	0.018	0.144	9.31061e-07	NK
PSMB2	6.26645e-11	-0.18129	0.071	0.271	1.0945e-06	NK
EIF4B	8.33004e-11	-0.200449	0.154	0.424	1.45493e-06	NK
EIF3H	8.39112e-11	-0.316039	0.313	0.602	1.46559e-06	NK
HERPUD1	8.47024e-11	-0.302398	0.18	0.449	1.47941e-06	NK
GMFG	9.09815e-11	-0.370755	0.447	0.72	1.58908e-06	NK
TRADD	9.21435e-11	-0.193899	0.065	0.254	1.60938e-06	NK
XBP1	9.32684e-11	-0.264051	0.203	0.483	1.62903e-06	NK
ATP5PB	9.67936e-11	-0.238822	0.152	0.407	1.6906e-06	NK
GIMAP4	1.09397e-10	-0.298798	0.298	0.602	1.91072e-06	NK
MSN	1.11532e-10	-0.243325	0.217	0.508	1.94801e-06	NK
TRPV2	1.13748e-10	-0.122116	0.024	0.161	1.98673e-06	NK
VASP	1.28107e-10	-0.180334	0.065	0.254	2.23752e-06	NK
VPS29	1.44574e-10	-0.210139	0.11	0.339	2.52513e-06	NK
NOP53	1.53505e-10	-0.312741	0.438	0.763	2.68112e-06	NK
ERG28	1.58964e-10	-0.157853	0.042	0.203	2.77646e-06	NK
THOC7	1.65527e-10	-0.220544	0.113	0.339	2.89109e-06	NK
LRP10	1.68834e-10	-0.144683	0.045	0.212	2.94886e-06	NK
USP10	1.72794e-10	-0.180597	0.042	0.203	3.01802e-06	NK
PCMT1	1.73414e-10	-0.156299	0.042	0.203	3.02885e-06	NK
TRABD	2.10391e-10	-0.188337	0.092	0.305	3.67468e-06	NK
PSMD4	2.16147e-10	-0.195271	0.079	0.28	3.77523e-06	NK
EIF4A1	2.27749e-10	-0.208701	0.113	0.339	3.97787e-06	NK
EVI2B	2.35371e-10	-0.248526	0.146	0.39	4.11099e-06	NK
ATP5F1C	2.43696e-10	-0.195569	0.097	0.314	4.2564e-06	NK
PKM	2.65478e-10	-0.18366	0.123	0.364	4.63684e-06	NK
PTGER2	2.68525e-10	-0.218818	0.123	0.356	4.69005e-06	NK
SKAP1	2.83877e-10	-0.240821	0.089	0.288	4.95819e-06	NK
SHKBP1	2.88068e-10	-0.14304	0.032	0.178	5.03139e-06	NK
SNX2	2.93383e-10	-0.127813	0.029	0.169	5.12423e-06	NK
VPS25	3.04021e-10	-0.105183	0.015	0.127	5.31004e-06	NK
CYBA	3.08487e-10	-0.342296	0.624	0.864	5.38804e-06	NK
TRAPPC6A	3.15992e-10	-0.210211	0.091	0.297	5.51912e-06	NK
SNRPB	3.20121e-10	-0.230044	0.144	0.39	5.59124e-06	NK
PSMB6	3.41319e-10	-0.181832	0.076	0.271	5.96147e-06	NK
PSMA3	3.52094e-10	-0.188347	0.076	0.271	6.14968e-06	NK
TNFRSF18	3.76086e-10	-0.160119	0.044	0.203	6.56872e-06	NK
SLC9A3R1	4.03175e-10	-0.21283	0.078	0.271	7.04186e-06	NK
TBC1D10C	4.71803e-10	-0.23142	0.147	0.39	8.2405e-06	NK
TUBB	4.82088e-10	-0.232995	0.136	0.373	8.42014e-06	NK
ZNF683	4.82187e-10	-0.239271	0.031	0.169	8.42187e-06	NK
ABHD3	5.16273e-10	-0.107893	0.018	0.136	9.01722e-06	NK
HSP90AB1	5.27213e-10	-0.283487	0.237	0.517	9.20831e-06	NK
UBXN4	5.2805e-10	-0.209344	0.135	0.373	9.22292e-06	NK
CHMP7	5.35257e-10	-0.135718	0.021	0.144	9.3488e-06	NK
PPP1R18	5.61197e-10	-0.23866	0.141	0.381	9.80187e-06	NK
UBE2A	5.83102e-10	-0.16982	0.057	0.229	1.01845e-05	NK
TUBA1A	5.95182e-10	-0.164572	0.057	0.229	1.03955e-05	NK
CD63	6.49739e-10	-0.265262	0.183	0.441	1.13483e-05	NK
FXYD5	7.1265e-10	-0.329475	0.431	0.729	1.24471e-05	NK
CLEC2D	7.89309e-10	-0.266813	0.323	0.627	1.37861e-05	NK
CLIC3	8.20887e-10	-0.306179	0.152	0.39	1.43376e-05	NK
G3BP2	8.68951e-10	-0.214146	0.104	0.314	1.51771e-05	NK
ERP44	8.7518e-10	-0.155485	0.045	0.203	1.52859e-05	NK
CYTIP	8.87837e-10	-0.239452	0.172	0.424	1.5507e-05	NK
SRSF7	9.31206e-10	-0.247056	0.206	0.466	1.62644e-05	NK
RNF10	9.56245e-10	-0.143138	0.045	0.203	1.67018e-05	NK
PPP1CC	9.93134e-10	-0.178462	0.083	0.28	1.73461e-05	NK
TBCB	1.01596e-09	-0.182472	0.092	0.297	1.77447e-05	NK
CD2	1.05927e-09	-0.367493	0.535	0.814	1.85012e-05	NK
CTSC	1.06056e-09	-0.242806	0.185	0.441	1.85237e-05	NK
MUC20-OT1	1.10658e-09	-0.165033	0.062	0.237	1.93275e-05	NK
LRMP	1.11297e-09	-0.111078	0.016	0.127	1.94391e-05	NK
GSTK1	1.20928e-09	-0.306931	0.282	0.551	2.11212e-05	NK
NUCB2	1.21781e-09	-0.204711	0.099	0.305	2.12703e-05	NK
DHRS7	1.25907e-09	-0.177739	0.102	0.314	2.19909e-05	NK
RAB2A	1.27269e-09	-0.169554	0.071	0.254	2.22287e-05	NK
TAGAP	1.33451e-09	-0.146385	0.065	0.246	2.33085e-05	NK
GSDMD	1.38947e-09	-0.153242	0.032	0.169	2.42685e-05	NK
OSM	1.39005e-09	-0.170661	0.011	0.11	2.42786e-05	NK
LRPAP1	1.42689e-09	-0.129967	0.042	0.195	2.49221e-05	NK
SPAG7	1.43594e-09	-0.152347	0.062	0.237	2.50801e-05	NK
ATP1A1	1.44899e-09	-0.191825	0.076	0.263	2.53081e-05	NK
ARFGAP2	1.47676e-09	-0.1639	0.047	0.203	2.57931e-05	NK
SSSCA1	1.51324e-09	-0.141476	0.036	0.178	2.64303e-05	NK
ABTB1	1.52041e-09	-0.115328	0.019	0.136	2.65555e-05	NK
ETFB	1.52401e-09	-0.168926	0.063	0.237	2.66184e-05	NK
PDCD10	1.56827e-09	-0.153115	0.066	0.246	2.73915e-05	NK
PSMD2	1.74552e-09	-0.130968	0.023	0.144	3.04872e-05	NK
NDUFA10	1.76524e-09	-0.147067	0.058	0.229	3.08317e-05	NK
TAF12	1.7954e-09	-0.143234	0.058	0.229	3.13584e-05	NK
PSTPIP1	1.86424e-09	-0.16304	0.055	0.22	3.25608e-05	NK
CCNI	1.87447e-09	-0.272943	0.391	0.669	3.27395e-05	NK
MRPS31	1.94584e-09	-0.148565	0.047	0.203	3.3986e-05	NK
NDUFB8	1.99579e-09	-0.253445	0.204	0.458	3.48584e-05	NK
ARPC3	2.01391e-09	-0.268848	0.446	0.729	3.51749e-05	NK
DNAJA1	2.01394e-09	-0.158344	0.063	0.237	3.51755e-05	NK
LIMD2	2.03038e-09	-0.277896	0.321	0.61	3.54626e-05	NK
METTL9	2.12547e-09	-0.199309	0.105	0.314	3.71234e-05	NK
NOSIP	2.19955e-09	-0.260227	0.18	0.432	3.84174e-05	NK
ALDH9A1	2.21787e-09	-0.12054	0.026	0.153	3.87374e-05	NK
UBE2I	2.27166e-09	-0.228448	0.151	0.381	3.96768e-05	NK
PDIA4	2.32371e-09	-0.14623	0.044	0.195	4.05859e-05	NK
PPHLN1	2.45814e-09	-0.161718	0.094	0.297	4.29338e-05	NK
PTGES3	2.4694e-09	-0.223318	0.186	0.441	4.31306e-05	NK
LGALS3	2.57756e-09	-0.215911	0.102	0.305	4.50197e-05	NK
RAB7A	2.60653e-09	-0.153115	0.063	0.237	4.55257e-05	NK
SOCS3	2.81193e-09	-0.116919	0.015	0.119	4.91132e-05	NK
TSC22D4	2.83403e-09	-0.206521	0.079	0.263	4.94991e-05	NK
CLNS1A	2.88392e-09	-0.17258	0.091	0.288	5.03705e-05	NK
GZMA	2.97542e-09	-0.602671	0.418	0.619	5.19687e-05	NK
OFD1	3.11824e-09	-0.179011	0.092	0.288	5.44632e-05	NK
IMPDH2	3.39773e-09	-0.14623	0.041	0.186	5.93447e-05	NK
SNRPD3	3.40709e-09	-0.190285	0.097	0.297	5.95083e-05	NK
MRPS12	3.61932e-09	-0.157444	0.086	0.28	6.32151e-05	NK
PPP1R12A	3.71505e-09	-0.194117	0.104	0.305	6.4887e-05	NK
BTG2	3.76455e-09	-0.137489	0.034	0.169	6.57516e-05	NK
TSC22D3	3.79548e-09	-0.235174	0.258	0.542	6.62918e-05	NK
AKR1B1	3.96886e-09	-0.129682	0.037	0.178	6.93202e-05	NK
SPCS2	4.06367e-09	-0.23862	0.248	0.525	7.09761e-05	NK
HADHB	4.0685e-09	-0.150884	0.034	0.169	7.10604e-05	NK
ITGB2	4.09006e-09	-0.213823	0.122	0.339	7.1437e-05	NK
RAB11A	4.098e-09	-0.165033	0.07	0.246	7.15757e-05	NK
PTPN6	4.27862e-09	-0.122514	0.037	0.178	7.47305e-05	NK
IDH2	4.77013e-09	-0.209344	0.146	0.373	8.3315e-05	NK
ASNA1	4.96444e-09	-0.124668	0.031	0.161	8.67089e-05	NK
ATP6V0E1	5.12577e-09	-0.214717	0.287	0.585	8.95267e-05	NK
FKBP8	5.14986e-09	-0.193457	0.128	0.347	8.99474e-05	NK
HNRNPH3	5.15768e-09	-0.160119	0.042	0.186	9.00841e-05	NK
RSU1	5.74781e-09	-0.11997	0.031	0.161	0.000100391	NK
FAM215B	5.77585e-09	-0.175275	0.071	0.246	0.000100881	NK
NUDC	6.0891e-09	-0.161872	0.084	0.271	0.000106352	NK
SNX6	6.16954e-09	-0.209858	0.083	0.263	0.000107757	NK
CD37	6.2227e-09	-0.278361	0.348	0.619	0.000108686	NK
AQP3	6.28107e-09	-0.178086	0.055	0.212	0.000109705	NK
HNRNPK	6.28347e-09	-0.250455	0.217	0.466	0.000109747	NK
NCOR1	6.53268e-09	-0.226837	0.13	0.347	0.0001141	NK
CD96	6.57376e-09	-0.21007	0.133	0.347	0.000114817	NK
FYB1	6.71858e-09	-0.25357	0.235	0.5	0.000117347	NK
ITM2A	6.75293e-09	-0.162192	0.058	0.22	0.000117947	NK
ABT1	6.89844e-09	-0.137837	0.053	0.212	0.000120488	NK
DNAJC15	7.03219e-09	-0.149351	0.066	0.237	0.000122824	NK
NUCB1	7.31138e-09	-0.126577	0.042	0.186	0.000127701	NK
CHMP2A	7.39919e-09	-0.166107	0.089	0.28	0.000129234	NK
PSMC1	8.50154e-09	-0.150874	0.055	0.212	0.000148488	NK
DENND2D	9.31587e-09	-0.174944	0.088	0.271	0.000162711	NK
TINF2	9.8388e-09	-0.126577	0.039	0.178	0.000171844	NK
CYBC1	1.14479e-08	-0.135653	0.063	0.229	0.000199948	NK
TAX1BP1	1.16583e-08	-0.185973	0.122	0.331	0.000203624	NK
NDUFA9	1.23217e-08	-0.144683	0.044	0.186	0.00021521	NK
GLIPR2	1.23233e-08	-0.162368	0.096	0.288	0.000215238	NK
C12orf75	1.24067e-08	-0.26789	0.259	0.517	0.000216695	NK
ADA	1.26538e-08	-0.150874	0.052	0.203	0.000221011	NK
PCID2	1.33158e-08	-0.114261	0.032	0.161	0.000232573	NK
PPP2R1A	1.33158e-08	-0.114261	0.032	0.161	0.000232573	NK
GMPS	1.35984e-08	-0.132145	0.044	0.186	0.00023751	NK
CD7	1.36066e-08	-0.376003	0.371	0.619	0.000237654	NK
ACAT2	1.40055e-08	-0.108989	0.026	0.144	0.000244621	NK
TRGC2	1.40451e-08	-0.401421	0.141	0.339	0.000245311	NK
CAPN1	1.40876e-08	-0.11479	0.026	0.144	0.000246054	NK
CCPG1	1.49679e-08	-0.10741	0.026	0.144	0.00026143	NK
MYC	1.5006e-08	-0.195718	0.07	0.237	0.000262094	NK
CNBP	1.58619e-08	-0.167201	0.196	0.458	0.000277045	NK
CSDE1	1.63284e-08	-0.162829	0.154	0.39	0.000285193	NK
VDAC2	1.70365e-08	-0.198059	0.094	0.28	0.000297559	NK
OPTN	1.76046e-08	-0.176424	0.084	0.263	0.000307482	NK
BTN3A2	1.88018e-08	-0.181832	0.071	0.237	0.000328392	NK
CAPN2	1.9128e-08	-0.161206	0.079	0.254	0.00033409	NK
RBMX	1.98548e-08	-0.174869	0.113	0.314	0.000346784	NK
HAX1	2.08998e-08	-0.167349	0.104	0.297	0.000365036	NK
PPIL3	2.10975e-08	-0.128128	0.037	0.169	0.000368489	NK
CCM2	2.21379e-08	-0.145488	0.053	0.203	0.00038666	NK
HNRNPR	2.2601e-08	-0.149371	0.083	0.263	0.000394748	NK
EIF4H	2.36267e-08	-0.158344	0.071	0.237	0.000412664	NK
NDUFA12	2.38326e-08	-0.218293	0.175	0.398	0.00041626	NK
TLN1	2.46292e-08	-0.186886	0.105	0.297	0.000430174	NK
CMTM6	2.54935e-08	-0.154561	0.07	0.237	0.00044527	NK
SQSTM1	2.55266e-08	-0.147872	0.075	0.246	0.000445847	NK
ABHD14A	2.62596e-08	-0.136121	0.045	0.186	0.00045865	NK
TAF7	2.69223e-08	-0.153074	0.079	0.254	0.000470225	NK
PRDX5	2.75848e-08	-0.212121	0.133	0.339	0.000481796	NK
CCNH	2.76954e-08	-0.140057	0.045	0.186	0.000483728	NK
SAFB	2.7712e-08	-0.118409	0.034	0.161	0.000484019	NK
COX5A	2.85335e-08	-0.199622	0.22	0.475	0.000498366	NK
CALM1	2.87841e-08	-0.31195	0.511	0.754	0.000502744	NK
LONP2	2.96805e-08	-0.137837	0.053	0.203	0.0005184	NK
NT5DC1	3.03954e-08	-0.101993	0.018	0.119	0.000530887	NK
TTC1	3.0664e-08	-0.159281	0.055	0.203	0.000535578	NK
ATG2A	3.08294e-08	-0.107893	0.018	0.119	0.000538467	NK
PSMA4	3.09294e-08	-0.194317	0.131	0.339	0.000540213	NK
PSMD13	3.26849e-08	-0.152377	0.058	0.212	0.000570875	NK
GID8	3.27471e-08	-0.11795	0.024	0.136	0.000571962	NK
DPP7	3.34307e-08	-0.171706	0.1	0.288	0.000583901	NK
HSD17B7	3.42118e-08	-0.106304	0.021	0.127	0.000597543	NK
OCIAD1	3.47597e-08	-0.156752	0.086	0.263	0.000607112	NK
ARRDC1	3.51352e-08	-0.111136	0.031	0.153	0.000613671	NK
SMARCB1	3.52159e-08	-0.136121	0.042	0.178	0.000615081	NK
FERMT3	3.53487e-08	-0.134793	0.058	0.212	0.000617401	NK
RFXANK	3.69152e-08	-0.108989	0.024	0.136	0.00064476	NK
TAF9	3.71967e-08	-0.158918	0.091	0.271	0.000649678	NK
MTERF4	3.75356e-08	-0.147067	0.063	0.22	0.000655597	NK
RBM8A	3.81856e-08	-0.204533	0.157	0.373	0.00066695	NK
HNRNPD	3.85127e-08	-0.147262	0.112	0.314	0.000672662	NK
GPSM3	4.01469e-08	-0.252161	0.254	0.5	0.000701205	NK
CD247	4.13449e-08	-0.187847	0.112	0.305	0.00072213	NK
SELENOF	4.22176e-08	-0.207265	0.173	0.398	0.000737373	NK
FLNA	4.60746e-08	-0.212239	0.115	0.305	0.000804739	NK
WDR1	4.62095e-08	-0.150107	0.081	0.254	0.000807094	NK
TMED2	4.63844e-08	-0.170753	0.185	0.424	0.000810149	NK
UQCR11	4.63952e-08	0.332922	0.72	0.559	0.000810338	NK
ADRM1	4.8973e-08	-0.137164	0.068	0.229	0.000855362	NK
NDUFC2	5.21767e-08	-0.195701	0.182	0.415	0.000911318	NK
AES	5.31072e-08	-0.189549	0.186	0.424	0.00092757	NK
SH3BGRL	5.36512e-08	-0.188786	0.123	0.322	0.000937071	NK
RHOH	5.57507e-08	-0.164706	0.123	0.322	0.000973741	NK
CASP1	5.80366e-08	-0.144037	0.06	0.212	0.00101367	NK
TTC19	5.85391e-08	-0.152317	0.088	0.263	0.00102244	NK
EIF3M	5.90553e-08	-0.230352	0.178	0.398	0.00103146	NK
AP1S2	6.30048e-08	-0.122327	0.047	0.186	0.00110044	NK
MAD1L1	6.33295e-08	-0.111136	0.036	0.161	0.00110611	NK
NBEAL1	6.42921e-08	0.384435	0.468	0.229	0.00112293	NK
CDC25B	6.79961e-08	-0.150107	0.049	0.186	0.00118762	NK
CISH	7.23219e-08	-0.136984	0.057	0.203	0.00126317	NK
JPT1	7.33787e-08	-0.19302	0.12	0.314	0.00128163	NK
TMEM123	7.35179e-08	-0.20317	0.154	0.364	0.00128406	NK
ZNF350	7.35435e-08	-0.103587	0.016	0.11	0.00128451	NK
DNAJB6	7.51337e-08	-0.153607	0.115	0.314	0.00131229	NK
ATXN10	7.75587e-08	-0.106935	0.032	0.153	0.00135464	NK
RGS1	7.80138e-08	-0.132549	0.016	0.11	0.00136259	NK
TC2N	7.90667e-08	-0.219378	0.146	0.347	0.00138098	NK
TMED9	7.9146e-08	-0.156051	0.079	0.246	0.00138236	NK
ALDH7A1	8.0807e-08	-0.105834	0.029	0.144	0.00141137	NK
OASL	8.10977e-08	-0.115827	0.029	0.144	0.00141645	NK
EIF3G	8.33338e-08	-0.248087	0.243	0.475	0.00145551	NK
CRYZL1	8.57025e-08	-0.108989	0.026	0.136	0.00149688	NK
NDUFS3	8.68769e-08	-0.133274	0.057	0.203	0.00151739	NK
RNF166	9.02833e-08	-0.157746	0.053	0.195	0.00157689	NK
HEXB	9.08467e-08	-0.101554	0.026	0.136	0.00158673	NK
CFAP298	9.08467e-08	-0.101554	0.026	0.136	0.00158673	NK
NSG1	9.13265e-08	-0.11057	0.023	0.127	0.00159511	NK
MORF4L1	9.35763e-08	-0.20028	0.237	0.483	0.0016344	NK
CMAS	9.37899e-08	-0.110639	0.041	0.169	0.00163813	NK
VAMP2	9.40789e-08	-0.210873	0.251	0.5	0.00164318	NK
PSMA7	9.75625e-08	-0.251139	0.316	0.576	0.00170403	NK
TUFM	9.85948e-08	-0.15947	0.104	0.288	0.00172206	NK
PDLIM2	1.02059e-07	-0.138678	0.066	0.22	0.00178256	NK
SQOR	1.02149e-07	-0.138519	0.053	0.195	0.00178414	NK
RARRES3	1.03789e-07	-0.348925	0.392	0.627	0.00181279	NK
HSD17B10	1.14065e-07	-0.139509	0.066	0.22	0.00199226	NK
ST13	1.15715e-07	-0.182763	0.138	0.339	0.00202107	NK
IDH3G	1.20553e-07	-0.130598	0.045	0.178	0.00210558	NK
SDF2	1.21512e-07	-0.14089	0.058	0.203	0.00212234	NK
CHST12	1.2392e-07	-0.197911	0.144	0.347	0.00216438	NK
NDUFAF3	1.26674e-07	-0.140459	0.084	0.254	0.00221249	NK
NPM1	1.3022e-07	-0.264452	0.65	0.847	0.00227442	NK
HLA-DRB1	1.32538e-07	-0.361709	0.146	0.331	0.00231492	NK
SNRNP40	1.36275e-07	-0.115827	0.034	0.153	0.00238019	NK
NCL	1.36288e-07	-0.234367	0.232	0.458	0.0023804	NK
RAB5IF	1.36544e-07	-0.126904	0.053	0.195	0.00238487	NK
TECR	1.41279e-07	-0.16632	0.083	0.246	0.00246757	NK
ANXA2R	1.47731e-07	-0.164454	0.112	0.297	0.00258027	NK
RASSF5	1.50013e-07	-0.145672	0.086	0.254	0.00262012	NK
MKRN1	1.52782e-07	-0.133694	0.042	0.169	0.00266849	NK
IRF3	1.59484e-07	-0.133274	0.058	0.203	0.00278555	NK
HSPA9	1.62595e-07	-0.143953	0.055	0.195	0.00283988	NK
IER2	1.72996e-07	-0.237459	0.149	0.347	0.00302155	NK
MAL	1.77582e-07	-0.105183	0.015	0.102	0.00310165	NK
CD3G	1.7989e-07	-0.158996	0.324	0.593	0.00314196	NK
PFDN5	1.82946e-07	0.28574	0.951	0.907	0.00319534	NK
NDUFB5	1.83625e-07	-0.172868	0.12	0.305	0.0032072	NK
SLAMF1	1.90445e-07	-0.10269	0.031	0.144	0.00332631	NK
LMAN2	1.93845e-07	-0.165901	0.109	0.288	0.00338569	NK
UBXN1	1.94116e-07	-0.207265	0.29	0.542	0.00339043	NK
R3HDM4	1.95489e-07	-0.132145	0.047	0.178	0.00341442	NK
DAXX	1.97001e-07	-0.125629	0.039	0.161	0.00344081	NK
NAPRT	1.99821e-07	-0.11479	0.028	0.136	0.00349008	NK
TNFSF12	2.05487e-07	-0.110639	0.042	0.169	0.00358903	NK
ATP5MF	2.09185e-07	-0.176355	0.263	0.525	0.00365362	NK
MDH2	2.09701e-07	-0.171706	0.104	0.28	0.00366264	NK
CD27	2.12417e-07	-0.269221	0.175	0.364	0.00371008	NK
ERH	2.13633e-07	-0.192432	0.227	0.466	0.00373132	NK
KRAS	2.14457e-07	-0.141713	0.06	0.203	0.00374571	NK
CCDC12	2.19067e-07	-0.181768	0.13	0.322	0.00382622	NK
H2AFY	2.20053e-07	-0.136223	0.092	0.263	0.00384344	NK
COLEC12	2.25161e-07	-0.103135	0.024	0.127	0.00393267	NK
MRPL9	2.27207e-07	-0.129345	0.06	0.203	0.0039684	NK
COX7A2L	2.3356e-07	-0.211703	0.217	0.441	0.00407936	NK
MFF	2.60656e-07	-0.141016	0.075	0.229	0.00455261	NK
PSMC2	2.61423e-07	-0.114768	0.047	0.178	0.00456601	NK
ATP1B3	2.637e-07	-0.159982	0.062	0.203	0.00460579	NK
STUB1	2.66284e-07	-0.123851	0.06	0.203	0.00465092	NK
TOMM7	2.71802e-07	0.314715	0.869	0.822	0.0047473	NK
CLTA	2.74174e-07	-0.17258	0.115	0.297	0.00478871	NK
PMF1	2.88865e-07	-0.133922	0.052	0.186	0.00504531	NK
TERF2IP	2.93384e-07	-0.175033	0.154	0.356	0.00512425	NK
EID1	3.00804e-07	-0.206633	0.212	0.441	0.00525385	NK
TMC6	3.08355e-07	-0.133942	0.097	0.271	0.00538572	NK
IL10RA	3.11087e-07	-0.175108	0.133	0.322	0.00543345	NK
APOBEC3H	3.12737e-07	-0.128434	0.052	0.186	0.00546226	NK
SEPT9	3.20672e-07	-0.208634	0.149	0.339	0.00560086	NK
SF3B2	3.29313e-07	-0.168328	0.126	0.314	0.00575177	NK
GTF3A	3.32105e-07	-0.216938	0.34	0.602	0.00580054	NK
ZFR	3.34617e-07	-0.117859	0.044	0.169	0.00584443	NK
PPA2	3.41137e-07	-0.133274	0.057	0.195	0.0059583	NK
PPP3CC	3.51128e-07	-0.130598	0.049	0.178	0.0061328	NK
HDLBP	3.5281e-07	-0.1231	0.032	0.144	0.00616218	NK
TMEM50A	3.63733e-07	-0.178278	0.159	0.364	0.00635296	NK
SRI	3.6988e-07	-0.17258	0.149	0.347	0.00646032	NK
AIP	3.74116e-07	-0.126305	0.057	0.195	0.00653431	NK
CCT3	3.86087e-07	-0.167732	0.128	0.314	0.00674339	NK
RHOF	4.04226e-07	-0.144952	0.167	0.381	0.00706021	NK
[truncated: 3,001 more rows]

## Sheet: 1g
Supplementary File 1g: GWAS risk genes per meta cluster in Figure 3G
Gene.ID	Avg. gene expression B27+AAU minus B27-AU	Cluster.ID
IFNGR2	0.774895	mergedDC
HLA-DRB5	0.508933	mergedDC
AHR	0.404885	mergedDC
TSPAN14	0.270331	mergedDC
SLC39A11	0.262469	mergedDC
PRDM1	0.20028	mergedDC
IL7R	0.0857114	mergedDC
DNMT3A	0.0736872	mergedDC
PRKCB	0.0714617	mergedDC
KPNB1	0.0692487	mergedDC
IL18R1	0.0568797	mergedDC
TNFAIP3	0.055093	mergedDC
CDKAL1	0.0528988	mergedDC
ITGAL	0.0459088	mergedDC
USP8	0.0453696	mergedDC
ATXN2	0.0412195	mergedDC
ERAP2	0.04016	mergedDC
PVT1	0.0399845	mergedDC
CREM	0.0365302	mergedDC
IL2RA	0.0303425	mergedDC
ANO6	0.0250326	mergedDC
NPEPPS	0.0250263	mergedDC
ERAP1	0.0249448	mergedDC
HIPK1	0.0238791	mergedDC
DENND1B	0.0230829	mergedDC
MEFV	0.0229951	mergedDC
ZMIZ1	0.0227318	mergedDC
SMAD3	0.0168075	mergedDC
FUT2	0.0159236	mergedDC
AC116366.3	0.0153029	mergedDC
IL6R	0.0124693	mergedDC
ETS1	0.0122937	mergedDC
SKAP2	0.0122624	mergedDC
FAM177A1	0.0114035	mergedDC
CDC37	0.0109584	mergedDC
FNDC3A	0.00928457	mergedDC
NFATC1	0.00884573	mergedDC
NR5A2	0.00875796	mergedDC
POT1	0.00875796	mergedDC
TNFSF15	0.00796178	mergedDC
GATD3A	0.00725337	mergedDC
RASGRP1	0.00663273	mergedDC
HLA-DQA2	0.00645719	mergedDC
TYK2	0.00601209	mergedDC
EYS	0.00557325	mergedDC
RASSF8-AS1	0.00477707	mergedDC
BACH2	0.00477707	mergedDC
UBASH3A	0.00477707	mergedDC
FGFR1OP	0.00424419	mergedDC
LINC01934	0.00415643	mergedDC
AF064858.1	0.00398089	mergedDC
RPS6KB1	0.00353578	mergedDC
HIF3A	0.00318471	mergedDC
EOMES	0.0024763	mergedDC
SETD1A	0.0024763	mergedDC
AC007014.1	0.00238854	mergedDC
PKIG	0.00238854	mergedDC
GPSM1	0.00238854	mergedDC
AF121898.1	0.00238854	mergedDC
ERN1	0.00194343	mergedDC
IL10	0.00185566	mergedDC
AC005840.2	0.00159236	mergedDC
AL391684.1	0.00159236	mergedDC
IFNG-AS1	0.00159236	mergedDC
NKD1	0.00159236	mergedDC
RORC	0.00159236	mergedDC
TEX41	0.00159236	mergedDC
PUS10	0.000971714	mergedDC
SMURF1	0.000883946	mergedDC
AC009126.1	0.000796178	mergedDC
AL035530.2	0.000796178	mergedDC
C1QTNF12	0.000796178	mergedDC
IFNLR1	0.000796178	mergedDC
LINC00598	0.000796178	mergedDC
MST1	0.000796178	mergedDC
OSMR	0.000796178	mergedDC
PTPRK	0.000796178	mergedDC
AC007220.1	0	mergedDC
CXCR1	0	mergedDC
DNMT3B	0	mergedDC
IRGM	0	mergedDC
PRKCQ	-0.000708411	mergedDC
IKZF1	-0.00125382	mergedDC
KEAP1	-0.00141682	mergedDC
ZBTB40	-0.00150459	mergedDC
HHAT	-0.00230077	mergedDC
IL23R	-0.00230077	mergedDC
KIF21B	-0.00230077	mergedDC
CD28	-0.00300918	mergedDC
AC007728.2	-0.00309695	mergedDC
KIFAP3	-0.00309695	mergedDC
CXCR2	-0.00389312	mergedDC
FAS	-0.004426	mergedDC
MYOM2	-0.0046893	mergedDC
C17orf67	-0.0046893	mergedDC
INAVA	-0.0046893	mergedDC
CD226	-0.00495887	mergedDC
ATG16L1	-0.00539771	mergedDC
PLAU	-0.00539771	mergedDC
ADCY3	-0.00539771	mergedDC
IL1R1	-0.00619389	mergedDC
NPAS3	-0.00628166	mergedDC
ANTXR2	-0.00646346	mergedDC
GPR35	-0.00699007	mergedDC
AC006974.2	-0.00707784	mergedDC
IL12RB2	-0.00707784	mergedDC
GNA12	-0.00769848	mergedDC
AL356234.2	-0.00787402	mergedDC
AL356417.3	-0.00787402	mergedDC
IL21-AS1	-0.00787402	mergedDC
RTEL1-TNFRSF6B	-0.00787402	mergedDC
AC008906.1	-0.00787402	mergedDC
CPEB4	-0.00814986	mergedDC
CCL2	-0.00902753	mergedDC
THEMIS	-0.0093786	mergedDC
JAZF1	-0.00964818	mergedDC
EMSY	-0.00982371	mergedDC
AC073332.1	-0.010087	mergedDC
HDAC7	-0.0107954	mergedDC
SBNO2	-0.011065	mergedDC
MICA	-0.0116794	mergedDC
SLC9A8	-0.0117671	mergedDC
FAM118A	-0.0120367	mergedDC
CD6	-0.0123878	mergedDC
THADA	-0.013184	mergedDC
PPP5C	-0.0132717	mergedDC
RAVER1	-0.0133595	mergedDC
KSR1	-0.0139801	mergedDC
NOTCH1	-0.0140679	mergedDC
RIC8B	-0.0140679	mergedDC
ZNF831	-0.0149519	mergedDC
CSF2RB	-0.0154032	mergedDC
IL15RA	-0.0169893	mergedDC
TNFRSF1A	-0.0171774	mergedDC
TTC33	-0.0172526	mergedDC
ACTA2	-0.0180488	mergedDC
TMCO4	-0.0180488	mergedDC
TBKBP1	-0.018845	mergedDC
TBC1D5	-0.0191145	mergedDC
HHEX	-0.0194719	mergedDC
OTUD3	-0.0196412	mergedDC
SNN	-0.0202618	mergedDC
TNIP1	-0.0205314	mergedDC
POFUT1	-0.0211457	mergedDC
MAPK3	-0.0216786	mergedDC
BANK1	-0.0217664	mergedDC
RDX	-0.0218604	mergedDC
CTLA4	-0.0220297	mergedDC
PPP2R3C	-0.0229199	mergedDC
PTPN22	-0.0231832	mergedDC
SNAPC4	-0.0235343	mergedDC
CD244	-0.0235343	mergedDC
RMI2	-0.0242427	mergedDC
IFIH1	-0.0253084	mergedDC
CLEC16A	-0.0257473	mergedDC
SP140	-0.0262802	mergedDC
LRRK2	-0.0272644	mergedDC
ANKRD55	-0.0275152	mergedDC
PCSK5	-0.0282236	mergedDC
CHSY1	-0.0317656	mergedDC
B3GALT6	-0.0320289	mergedDC
ASAP2	-0.034593	mergedDC
LPXN	-0.0356588	mergedDC
LSM14A	-0.0394704	mergedDC
NOD2	-0.0404358	mergedDC
LTBR	-0.0407054	mergedDC
COMMD7	-0.0410565	mergedDC
JAK2	-0.0414138	mergedDC
CLCN7	-0.0429121	mergedDC
IRF5	-0.0468053	mergedDC
RPS6KA4	-0.0499022	mergedDC
TMEM87B	-0.0548548	mergedDC
STK11	-0.055651	mergedDC
IL27	-0.0564472	mergedDC
FIBP	-0.0565475	mergedDC
PSMA6	-0.0571618	mergedDC
CMC1	-0.0582213	mergedDC
DAP	-0.0592808	mergedDC
CD40	-0.0592808	mergedDC
ATG5	-0.0594563	mergedDC
CARD9	-0.0619326	mergedDC
NFKB1	-0.0675122	mergedDC
SH2B3	-0.0678632	mergedDC
TLR4	-0.0892785	mergedDC
NDFIP1	-0.0953847	mergedDC
ASCL2	-0.100507	mergedDC
UBAC2	-0.104845	mergedDC
LITAF	-0.119728	mergedDC
DLD	-0.124041	mergedDC
STAT3	-0.128743	mergedDC
PTTG1IP	-0.137056	mergedDC
PTPN2	-0.146892	mergedDC
TNFRSF14	-0.160765	mergedDC
KRTCAP2	-0.184036	mergedDC
UQCR10	-0.184952	mergedDC
TMEM258	-0.220523	mergedDC
UBE2L3	-0.248533	mergedDC
PARK7	-0.270306	mergedDC
FCGR2A	-0.321719	mergedDC
ADAM28	-0.343548	mergedDC
IL1R2	-0.460273	mergedDC
CORO1A	-0.601121	mergedDC
FOS	-1.52741	mergedDC
HLA-B	-1.86864	mergedDC
CCL2	0.581551	myeloidLin
HLA-DRB5	0.137334	myeloidLin
UQCR10	0.131127	myeloidLin
TMEM258	0.0540915	myeloidLin
IL7R	0.0393271	myeloidLin
PRDM1	0.0355501	myeloidLin
ETS1	0.0144792	myeloidLin
ERAP2	0.0125649	myeloidLin
CREM	0.0124033	myeloidLin
ATXN2	0.0112314	myeloidLin
CD226	0.00948895	myeloidLin
ADCY3	0.00582878	myeloidLin
INAVA	0.00548854	myeloidLin
PARK7	0.00545761	myeloidLin
LINC01934	0.00483899	myeloidLin
ZBTB40	0.00480118	myeloidLin
GATD3A	0.00468777	myeloidLin
IL12RB2	0.00419287	myeloidLin
HLA-DQA2	0.0033543	myeloidLin
RASGRP1	0.00277692	myeloidLin
TBKBP1	0.00262914	myeloidLin
FUT2	0.00251572	myeloidLin
PKIG	0.00251572	myeloidLin
SETD1A	0.00232326	myeloidLin
AF064858.1	0.00209644	myeloidLin
EYS	0.00209644	myeloidLin
CDKAL1	0.00178713	myeloidLin
RASSF8-AS1	0.00171495	myeloidLin
HIF3A	0.00167715	myeloidLin
FIBP	0.00133003	myeloidLin
RORC	0.00129567	myeloidLin
ANKRD55	0.00125786	myeloidLin
PCSK5	0.00117882	myeloidLin
AC007728.2	0.0010276	myeloidLin
MST1	0.000838574	myeloidLin
KIF21B	0.000570506	myeloidLin
NR5A2	0.000457092	myeloidLin
IRGM	0.000419287	myeloidLin
TEX41	0.000419287	myeloidLin
THEMIS	0.000378046	myeloidLin
NFKB1	0.000319621	myeloidLin
RMI2	0.000147782	myeloidLin
CD6	7.21724e-05	myeloidLin
MYOM2	3.78046e-05	myeloidLin
CXCR1	3.78046e-05	myeloidLin
IFNLR1	3.78046e-05	myeloidLin
PTPRK	3.78046e-05	myeloidLin
NPAS3	0	myeloidLin
IL21-AS1	0	myeloidLin
ZNF831	-0.000230264	myeloidLin
PVT1	-0.00030931	myeloidLin
IL23R	-0.000343678	myeloidLin
AL391684.1	-0.000381483	myeloidLin
HHAT	-0.000381483	myeloidLin
AC005840.2	-0.000762965	myeloidLin
AC008906.1	-0.000762965	myeloidLin
NKD1	-0.000762965	myeloidLin
AC006974.2	-0.00080077	myeloidLin
RTEL1-TNFRSF6B	-0.00080077	myeloidLin
TNFSF15	-0.00080077	myeloidLin
KIFAP3	-0.00099323	myeloidLin
AL356234.2	-0.00122006	myeloidLin
IFNG-AS1	-0.00122006	myeloidLin
PRKCQ	-0.00141252	myeloidLin
RIC8B	-0.00141252	myeloidLin
FAM177A1	-0.00147438	myeloidLin
ASAP2	-0.00156374	myeloidLin
AF121898.1	-0.00163934	myeloidLin
C1QTNF12	-0.00198302	myeloidLin
OSMR	-0.00202083	myeloidLin
GPSM1	-0.00202083	myeloidLin
ATG16L1	-0.00225109	myeloidLin
LINC00598	-0.00244011	myeloidLin
CD28	-0.00263257	myeloidLin
BACH2	-0.0028216	myeloidLin
AL035530.2	-0.0028594	myeloidLin
PUS10	-0.00305186	myeloidLin
C17orf67	-0.00358456	myeloidLin
AC007014.1	-0.00362237	myeloidLin
PLAU	-0.00392824	myeloidLin
AC009126.1	-0.00400385	myeloidLin
DNMT3A	-0.00450562	myeloidLin
OTUD3	-0.00480462	myeloidLin
DNMT3B	-0.00491803	myeloidLin
IL1R1	-0.00503488	myeloidLin
KSR1	-0.00557102	myeloidLin
SNAPC4	-0.00560539	myeloidLin
AC007220.1	-0.0057188	myeloidLin
CMC1	-0.00630649	myeloidLin
KPNB1	-0.00637523	myeloidLin
AL356417.3	-0.00648177	myeloidLin
TMCO4	-0.00674984	myeloidLin
ERN1	-0.00770526	myeloidLin
POFUT1	-0.00796989	myeloidLin
LSM14A	-0.00815548	myeloidLin
PPP5C	-0.00838918	myeloidLin
IL2RA	-0.00843386	myeloidLin
SMURF1	-0.00869505	myeloidLin
CD244	-0.00922776	myeloidLin
THADA	-0.00945802	myeloidLin
TTC33	-0.0103344	myeloidLin
UBASH3A	-0.0104478	myeloidLin
CXCR2	-0.0104856	myeloidLin
GPR35	-0.0106403	myeloidLin
FAS	-0.0110252	myeloidLin
SMAD3	-0.0112142	myeloidLin
TNIP1	-0.0114548	myeloidLin
FGFR1OP	-0.0115923	myeloidLin
CLEC16A	-0.0119737	myeloidLin
EMSY	-0.0128158	myeloidLin
CTLA4	-0.0130769	myeloidLin
COMMD7	-0.0136337	myeloidLin
ANTXR2	-0.0140358	myeloidLin
RAVER1	-0.0159364	myeloidLin
LITAF	-0.0164794	myeloidLin
AHR	-0.0175379	myeloidLin
AC073332.1	-0.0181153	myeloidLin
TYK2	-0.0184968	myeloidLin
NPEPPS	-0.0185895	myeloidLin
POT1	-0.0189504	myeloidLin
ACTA2	-0.0200158	myeloidLin
SLC9A8	-0.0205141	myeloidLin
SH2B3	-0.0205279	myeloidLin
DLD	-0.0207891	myeloidLin
ITGAL	-0.0212427	myeloidLin
PTPN22	-0.0212427	myeloidLin
MICA	-0.0213149	myeloidLin
CARD9	-0.0233357	myeloidLin
IL10	-0.0234182	myeloidLin
IL15RA	-0.0235316	myeloidLin
SNN	-0.0239097	myeloidLin
HDAC7	-0.0250129	myeloidLin
HHEX	-0.0259099	myeloidLin
BANK1	-0.0260817	myeloidLin
STK11	-0.0268447	myeloidLin
GNA12	-0.0269581	myeloidLin
MAPK3	-0.0271918	myeloidLin
LPXN	-0.0272056	myeloidLin
KEAP1	-0.0274152	myeloidLin
PPP2R3C	-0.027886	myeloidLin
CSF2RB	-0.0283637	myeloidLin
EOMES	-0.0289377	myeloidLin
FAM118A	-0.029168	myeloidLin
JAZF1	-0.0294463	myeloidLin
TBC1D5	-0.0318796	myeloidLin
TSPAN14	-0.0319621	myeloidLin
ATG5	-0.0322267	myeloidLin
RPS6KB1	-0.0352339	myeloidLin
NOTCH1	-0.0370244	myeloidLin
CD40	-0.0402722	myeloidLin
HIPK1	-0.0420284	myeloidLin
NFATC1	-0.0421315	myeloidLin
IRF5	-0.043166	myeloidLin
AC116366.3	-0.0435028	myeloidLin
LTBR	-0.0441764	myeloidLin
RDX	-0.0446232	myeloidLin
CLCN7	-0.0446541	myeloidLin
B3GALT6	-0.0447606	myeloidLin
CDC37	-0.0450906	myeloidLin
SBNO2	-0.0469052	myeloidLin
ANO6	-0.0488504	myeloidLin
SLC39A11	-0.0497989	myeloidLin
FNDC3A	-0.0505275	myeloidLin
PRKCB	-0.0529299	myeloidLin
TMEM87B	-0.0529642	myeloidLin
IKZF1	-0.0537925	myeloidLin
IL18R1	-0.0549404	myeloidLin
IFIH1	-0.0552531	myeloidLin
TNFAIP3	-0.0553356	myeloidLin
CHSY1	-0.0619342	myeloidLin
CPEB4	-0.0624704	myeloidLin
DENND1B	-0.0625357	myeloidLin
ERAP1	-0.0651648	myeloidLin
UBAC2	-0.0663539	myeloidLin
USP8	-0.0676221	myeloidLin
ZMIZ1	-0.0692477	myeloidLin
MEFV	-0.0701962	myeloidLin
IL27	-0.0734406	myeloidLin
TLR4	-0.0765612	myeloidLin
SP140	-0.0772107	myeloidLin
PSMA6	-0.0815411	myeloidLin
IL6R	-0.0852596	myeloidLin
PTPN2	-0.092147	myeloidLin
TNFRSF14	-0.0928618	myeloidLin
UBE2L3	-0.0948002	myeloidLin
NOD2	-0.0980342	myeloidLin
RPS6KA4	-0.0992851	myeloidLin
JAK2	-0.126865	myeloidLin
IFNGR2	-0.127639	myeloidLin
DAP	-0.132914	myeloidLin
NDFIP1	-0.139224	myeloidLin
SKAP2	-0.139255	myeloidLin
PTTG1IP	-0.140812	myeloidLin
TNFRSF1A	-0.147393	myeloidLin
KRTCAP2	-0.16833	myeloidLin
ASCL2	-0.176331	myeloidLin
STAT3	-0.201918	myeloidLin
ADAM28	-0.216648	myeloidLin
LRRK2	-0.270121	myeloidLin
CORO1A	-0.597512	myeloidLin
FCGR2A	-0.763498	myeloidLin
FOS	-1.16728	myeloidLin
IL1R2	-1.42365	myeloidLin
HLA-B	-3.79402	myeloidLin
PRDM1	0.459409	toxic
IL7R	0.405644	toxic
TMEM258	0.0976737	toxic
ERAP2	0.0493502	toxic
IL18R1	0.0491179	toxic
AHR	0.0251106	toxic
ANTXR2	0.0238031	toxic
SLC39A11	0.0231223	toxic
CDKAL1	0.0134407	toxic
AC073332.1	0.0110982	toxic
CCL2	0.0107849	toxic
STK11	0.00921906	toxic
CHSY1	0.00738075	toxic
SBNO2	0.00738075	toxic
IL15RA	0.00678158	toxic
IL12RB2	0.00642743	toxic
IFNGR2	0.0063866	toxic
CSF2RB	0.00595078	toxic
SKAP2	0.00548823	toxic
ASCL2	0.00539245	toxic
CD226	0.00521649	toxic
ANO6	0.00438494	toxic
IL2RA	0.0043441	toxic
CXCR2	0.00419413	toxic
CREM	0.00396397	toxic
AC007728.2	0.00355413	toxic
PKIG	0.00295497	toxic
RMI2	0.00295497	toxic
ADAM28	0.0028733	toxic
MEFV	0.00239664	toxic
CPEB4	0.00182495	toxic
MST1	0.00179748	toxic
LRRK2	0.00175665	toxic
GATD3A	0.00167498	toxic
RASSF8-AS1	0.00163414	toxic
SMAD3	0.00153911	toxic
SETD1A	0.00126663	toxic
IL27	0.00119832	toxic
IRGM	0.00119832	toxic
NPAS3	0.00119832	toxic
AC007220.1	0.00119832	toxic
MYOM2	0.00115749	toxic
HIF3A	0.00115749	toxic
AL391684.1	0.00115749	toxic
IFNLR1	0.00111665	toxic
TLR4	0.00107582	toxic
INAVA	0.000912477	toxic
AL356417.3	0.000599161	toxic
CXCR1	0.000599161	toxic
IL21-AS1	0.000599161	toxic
NR5A2	0.000599161	toxic
OSMR	0.000599161	toxic
TEX41	0.000599161	toxic
TNFSF15	0.000599161	toxic
LINC00598	0.000517491	toxic
PTPRK	0.000517491	toxic
RAVER1	0.000517491	toxic
FGFR1OP	0.000504127	toxic
FCGR2A	0.000394986	toxic
AC116366.3	0.000340787	toxic
AC005840.2	0	toxic
AF064858.1	0	toxic
CARD9	0	toxic
AC006974.2	0	toxic
ASAP2	0	toxic
BANK1	0	toxic
DNMT3B	0	toxic
RTEL1-TNFRSF6B	0	toxic
NOD2	-0.000122505	toxic
GNA12	-0.00016334	toxic
IL1R2	-0.000204175	toxic
IL6R	-0.000204175	toxic
TBKBP1	-0.00024501	toxic
IFNG-AS1	-0.000285845	toxic
BACH2	-0.00049002	toxic
CD40	-0.000680831	toxic
HHEX	-0.000680831	toxic
AF121898.1	-0.000680831	toxic
FUT2	-0.000721666	toxic
PCSK5	-0.000762501	toxic
C1QTNF12	-0.00123916	toxic
PLAU	-0.00123916	toxic
HLA-DQA2	-0.00123916	toxic
IRF5	-0.00132083	toxic
GPSM1	-0.00132083	toxic
HLA-DRB5	-0.00136166	toxic
AC009126.1	-0.0014025	toxic
C17orf67	-0.0014025	toxic
KIF21B	-0.00141586	toxic
RORC	-0.00144333	toxic
DAP	-0.0014567	toxic
POFUT1	-0.00164751	toxic
KSR1	-0.00224667	toxic
AL356234.2	-0.00247831	toxic
ANKRD55	-0.00247831	toxic
IL1R1	-0.00251915	toxic
FNDC3A	-0.00306337	toxic
AL035530.2	-0.00311831	toxic
AC008906.1	-0.00311831	toxic
EYS	-0.00315915	toxic
SNAPC4	-0.00328165	toxic
OTUD3	-0.00336332	toxic
CLCN7	-0.00344499	toxic
JAK2	-0.00377167	toxic
PVT1	-0.00393501	toxic
SMURF1	-0.00396248	toxic
CLEC16A	-0.00404415	toxic
RPS6KB1	-0.00430253	toxic
TMEM87B	-0.00453417	toxic
IL23R	-0.00456164	toxic
SH2B3	-0.00472498	toxic
GPR35	-0.00495663	toxic
HHAT	-0.00563746	toxic
LTBR	-0.00627746	toxic
IL10	-0.0064408	toxic
ADCY3	-0.00668581	toxic
AC007014.1	-0.00691745	toxic
B3GALT6	-0.00703996	toxic
TMCO4	-0.00716246	toxic
ZBTB40	-0.00784329	toxic
HIPK1	-0.00792422	toxic
ERN1	-0.00927178	toxic
DNMT3A	-0.0104434	toxic
NKD1	-0.0107574	toxic
PPP5C	-0.0107708	toxic
MICA	-0.0111249	toxic
NOTCH1	-0.0117649	toxic
PUS10	-0.0120783	toxic
EMSY	-0.0122141	toxic
POT1	-0.0131949	toxic
SNN	-0.0143116	toxic
UQCR10	-0.0154876	toxic
IFIH1	-0.0166399	toxic
KIFAP3	-0.0167624	toxic
RIC8B	-0.0169257	toxic
NFKB1	-0.0174291	toxic
SLC9A8	-0.017634	toxic
ITGAL	-0.0224934	toxic
THADA	-0.0232849	toxic
FAM118A	-0.0238432	toxic
KPNB1	-0.024331	toxic
CMC1	-0.0245285	toxic
FAS	-0.0245374	toxic
TTC33	-0.0251098	toxic
CD244	-0.0262673	toxic
TYK2	-0.0267573	toxic
CTLA4	-0.0268665	toxic
ZMIZ1	-0.0269073	toxic
JAZF1	-0.0273157	toxic
TBC1D5	-0.0282415	toxic
ACTA2	-0.0306656	toxic
PTTG1IP	-0.0310465	toxic
NFATC1	-0.0324356	toxic
RPS6KA4	-0.0325448	toxic
ZNF831	-0.0334023	toxic
PTPN2	-0.0346533	toxic
MAPK3	-0.0354314	toxic
KEAP1	-0.0359489	toxic
LINC01934	-0.0373373	toxic
ATG16L1	-0.0378281	toxic
DENND1B	-0.0378823	toxic
ETS1	-0.038301	toxic
PRKCQ	-0.0383998	toxic
RDX	-0.0456847	toxic
HDAC7	-0.0481497	toxic
ERAP1	-0.0579538	toxic
NPEPPS	-0.060323	toxic
ATG5	-0.0667504	toxic
ATXN2	-0.0673629	toxic
STAT3	-0.0699764	toxic
KRTCAP2	-0.0784174	toxic
TSPAN14	-0.0792764	toxic
CD6	-0.0810479	toxic
SP140	-0.0811978	toxic
TNIP1	-0.0830636	toxic
DLD	-0.0832136	toxic
UBAC2	-0.0835128	toxic
USP8	-0.0848054	toxic
PSMA6	-0.0856778	toxic
CD28	-0.0859236	toxic
RASGRP1	-0.0875147	toxic
TNFAIP3	-0.0886046	toxic
THEMIS	-0.0907978	toxic
PRKCB	-0.105504	toxic
TNFRSF1A	-0.108173	toxic
PTPN22	-0.116288	toxic
PPP2R3C	-0.117883	toxic
FAM177A1	-0.118808	toxic
EOMES	-0.129021	toxic
UBASH3A	-0.129812	toxic
LSM14A	-0.130627	toxic
IKZF1	-0.130733	toxic
TNFRSF14	-0.133133	toxic
CDC37	-0.141098	toxic
FOS	-0.155847	toxic
FIBP	-0.167802	toxic
NDFIP1	-0.169477	toxic
UBE2L3	-0.216685	toxic
LPXN	-0.22784	toxic
COMMD7	-0.232333	toxic
LITAF	-0.28266	toxic
PARK7	-0.37678	toxic
CORO1A	-2.75501	toxic
HLA-B	-3.97182	toxic
PRDM1	0.269783	help
TMEM258	0.1602	help
ERAP2	0.0327053	help
KPNB1	0.0290408	help
ITGAL	0.0261228	help
CDKAL1	0.0247689	help
DNMT3A	0.021611	help
AHR	0.00969309	help
IL18R1	0.00759569	help
SH2B3	0.00628925	help
CCL2	0.00583007	help
FUT2	0.00463918	help
TSPAN14	0.00433997	help
EOMES	0.00371193	help
HLA-DRB5	0.00337125	help
RASSF8-AS1	0.00297429	help
CXCR2	0.00245882	help
CXCR1	0.00231959	help
AL356417.3	0.00206186	help
PKIG	0.00180412	help
INAVA	0.00146937	help
PCSK5	0.0013094	help
NR5A2	0.00128866	help
PTPRK	0.00128866	help
HIF3A	0.00117016	help
MEFV	0.00117016	help
GATD3A	0.00081467	help
C1QTNF12	0.000773196	help
IL21-AS1	0.000773196	help
AC009126.1	0.000536201	help
LINC00598	0.000396966	help
MYOM2	0.000278469	help
IFNG-AS1	0.000278469	help
AL356234.2	0.000257732	help
DNMT3B	0.000257732	help
IL27	0.000257732	help
PLAU	0.000257732	help
TEX41	0.000257732	help
EYS	0.000257732	help
HHEX	0.000139235	help
OSMR	0.000139235	help
AC005840.2	0	help
AF064858.1	0	help
AC006974.2	0	help
CD40	-0.000118497	help
AC008906.1	-0.000118497	help
TNFSF15	-0.000118497	help
HHAT	-0.000355492	help
AC007728.2	-0.000376229	help
IL15RA	-0.000607299	help
CD244	-0.000633961	help
MST1	-0.000633961	help
SMURF1	-0.000829482	help
SETD1A	-0.000885768	help
GPSM1	-0.00101019	help
NPAS3	-0.00114943	help
AC007220.1	-0.00114943	help
ASAP2	-0.00114943	help
RTEL1-TNFRSF6B	-0.00114943	help
HLA-DQA2	-0.00114943	help
SMAD3	-0.00119386	help
LRRK2	-0.00124719	help
IFNLR1	-0.00126792	help
HIPK1	-0.00162045	help
AL391684.1	-0.00164415	help
PUS10	-0.00170044	help
IRGM	-0.00178339	help
ZMIZ1	-0.00183967	help
CSF2RB	-0.00186041	help
ASCL2	-0.00202038	help
AL035530.2	-0.00204112	help
NOD2	-0.00239661	help
GPR35	-0.00241735	help
SBNO2	-0.00246771	help
OTUD3	-0.00247363	help
SNAPC4	-0.00249437	help
LTBR	-0.00251511	help
NKD1	-0.00251511	help
SNN	-0.00253585	help
ADCY3	-0.00257139	help
TTC33	-0.00259213	help
ADAM28	-0.00267508	help
CARD9	-0.00267508	help
AF121898.1	-0.00279358	help
POFUT1	-0.00282913	help
LINC01934	-0.00291504	help
TLR4	-0.00305131	help
BANK1	-0.00319054	help
CHSY1	-0.00324683	help
TBKBP1	-0.00330904	help
IFNGR2	-0.00357566	help
B3GALT6	-0.00362306	help
AC007014.1	-0.00368527	help
SLC39A11	-0.00403484	help
IRF5	-0.00455623	help
GNA12	-0.00465399	help
CPEB4	-0.00486432	help
RMI2	-0.00507169	help
CLEC16A	-0.00528795	help
JAK2	-0.00538571	help
CLCN7	-0.00552494	help
AC116366.3	-0.00558123	help
TYK2	-0.00577675	help
MICA	-0.00601967	help
IL12RB2	-0.00631888	help
C17orf67	-0.00673658	help
NOTCH1	-0.00712762	help
BACH2	-0.00769937	help
RIC8B	-0.00794229	help
SLC9A8	-0.00796303	help
STK11	-0.00865328	help
KSR1	-0.0087777	help
FCGR2A	-0.00934945	help
IL23R	-0.00950942	help
RAVER1	-0.0103241	help
PPP5C	-0.0105966	help
ERAP1	-0.011044	help
TMCO4	-0.012066	help
RPS6KB1	-0.0125341	help
FGFR1OP	-0.0128747	help
IL1R1	-0.0139264	help
POT1	-0.0139679	help
EMSY	-0.0143382	help
IL10	-0.0151588	help
AC073332.1	-0.0153691	help
KIF21B	-0.0158076	help
PVT1	-0.0159972	help
ANKRD55	-0.0160297	help
FNDC3A	-0.0168326	help
ANO6	-0.0177094	help
SKAP2	-0.0191936	help
THADA	-0.0192706	help
IL1R2	-0.0194365	help
NPEPPS	-0.0204497	help
IFIH1	-0.0212762	help
ZBTB40	-0.0213799	help
ATG16L1	-0.0233795	help
KIFAP3	-0.0240905	help
KEAP1	-0.0243897	help
PRKCQ	-0.0246149	help
NFKB1	-0.0247275	help
JAZF1	-0.0250237	help
DENND1B	-0.0251926	help
FOS	-0.0262027	help
RORC	-0.0265079	help
TMEM87B	-0.0266679	help
ZNF831	-0.0274559	help
RPS6KA4	-0.0281935	help
FAM118A	-0.0286053	help
CD226	-0.0295829	help
ANTXR2	-0.0301872	help
HDAC7	-0.0302494	help
THEMIS	-0.0307738	help
DAP	-0.0312448	help
NFATC1	-0.0313841	help
PRKCB	-0.0327142	help
MAPK3	-0.0339614	help
IL6R	-0.0359077	help
ACTA2	-0.0366216	help
UQCR10	-0.0372289	help
TBC1D5	-0.0374245	help
CD6	-0.0380377	help
PTTG1IP	-0.0395574	help
TNFAIP3	-0.0420281	help
ETS1	-0.0424724	help
TNFRSF1A	-0.0436396	help
USP8	-0.0454023	help
FIBP	-0.0457341	help
ATXN2	-0.051813	help
UBASH3A	-0.0551813	help
DLD	-0.0564285	help
RDX	-0.0601849	help
PTPN2	-0.0606114	help
ATG5	-0.0610203	help
SP140	-0.0642345	help
ERN1	-0.0687374	help
PSMA6	-0.0696469	help
CMC1	-0.0703845	help
FAS	-0.0707519	help
KRTCAP2	-0.0716317	help
FAM177A1	-0.0729322	help
LSM14A	-0.0740046	help
PPP2R3C	-0.0762561	help
RASGRP1	-0.0770619	help
UBAC2	-0.0807145	help
PTPN22	-0.0834044	help
TNIP1	-0.0846161	help
CREM	-0.0869712	help
IL2RA	-0.0974345	help
LITAF	-0.0996593	help
CD28	-0.112789	help
CTLA4	-0.115034	help
TNFRSF14	-0.118109	help
STAT3	-0.126161	help
LPXN	-0.136204	help
CDC37	-0.151463	help
COMMD7	-0.155409	help
UBE2L3	-0.162507	help
IKZF1	-0.195755	help
NDFIP1	-0.199348	help
IL7R	-0.202779	help
PARK7	-0.266237	help
CORO1A	-1.37477	help
HLA-B	-2.62237	help
TMEM258	1.49084	BcLin
UQCR10	0.716117	BcLin
PRDM1	0.70696	BcLin
KRTCAP2	0.419414	BcLin
UBE2L3	0.247253	BcLin
FAM177A1	0.188645	BcLin
ERN1	0.144689	BcLin
PARK7	0.142857	BcLin
FIBP	0.139194	BcLin
CPEB4	0.104396	BcLin
IFNLR1	0.104396	BcLin
SKAP2	0.0934066	BcLin
IL6R	0.0897436	BcLin
CDKAL1	0.0769231	BcLin
DNMT3A	0.0769231	BcLin
IFNG-AS1	0.0659341	BcLin
KPNB1	0.0622711	BcLin
LINC01934	0.0512821	BcLin
HLA-DRB5	0.0512821	BcLin
ATG5	0.0457875	BcLin
TNFAIP3	0.040293	BcLin
IL15RA	0.0384615	BcLin
RDX	0.0384615	BcLin
RPS6KB1	0.0384615	BcLin
PKIG	0.03663	BcLin
HDAC7	0.029304	BcLin
TNIP1	0.029304	BcLin
DAP	0.0274725	BcLin
CSF2RB	0.025641	BcLin
FGFR1OP	0.025641	BcLin
RAVER1	0.025641	BcLin
NFKB1	0.0164835	BcLin
CHSY1	0.014652	BcLin
DENND1B	0.014652	BcLin
GATD3A	0.014652	BcLin
KEAP1	0.014652	BcLin
PUS10	0.014652	BcLin
ANO6	0.0128205	BcLin
SNAPC4	0.0128205	BcLin
GPR35	0.0128205	BcLin
AL356417.3	0.0128205	BcLin
CLEC16A	0.0128205	BcLin
CXCR1	0.0128205	BcLin
HIPK1	0.0128205	BcLin
INAVA	0.0128205	BcLin
PRKCQ	0.0128205	BcLin
RPS6KA4	0.0128205	BcLin
SLC39A11	0.0128205	BcLin
SMAD3	0.0128205	BcLin
STK11	0.0128205	BcLin
ETS1	0.003663	BcLin
PTPN22	0.003663	BcLin
STAT3	0.003663	BcLin
ADCY3	0.0018315	BcLin
ZMIZ1	0.0018315	BcLin
PVT1	0.0018315	BcLin
AC005840.2	0	BcLin
AF064858.1	0	BcLin
CARD9	0	BcLin
MEFV	0	BcLin
MICA	0	BcLin
MYOM2	0	BcLin
NPAS3	0	BcLin
RASSF8-AS1	0	BcLin
TBKBP1	0	BcLin
CD28	0	BcLin
NOD2	0	BcLin
AC006974.2	0	BcLin
AC007014.1	0	BcLin
AC007220.1	0	BcLin
AC007728.2	0	BcLin
AC009126.1	0	BcLin
AC073332.1	0	BcLin
AL035530.2	0	BcLin
AL356234.2	0	BcLin
AL391684.1	0	BcLin
ANKRD55	0	BcLin
ASAP2	0	BcLin
ASCL2	0	BcLin
C17orf67	0	BcLin
C1QTNF12	0	BcLin
CCL2	0	BcLin
CD226	0	BcLin
CD244	0	BcLin
CTLA4	0	BcLin
CXCR2	0	BcLin
DNMT3B	0	BcLin
FUT2	0	BcLin
HIF3A	0	BcLin
IL18R1	0	BcLin
IL1R1	0	BcLin
IL1R2	0	BcLin
IL21-AS1	0	BcLin
IL27	0	BcLin
IRGM	0	BcLin
LINC00598	0	BcLin
MST1	0	BcLin
OSMR	0	BcLin
OTUD3	0	BcLin
PLAU	0	BcLin
POFUT1	0	BcLin
RIC8B	0	BcLin
RORC	0	BcLin
RTEL1-TNFRSF6B	0	BcLin
SBNO2	0	BcLin
SETD1A	0	BcLin
SH2B3	0	BcLin
SMURF1	0	BcLin
TEX41	0	BcLin
THEMIS	0	BcLin
TLR4	0	BcLin
TNFSF15	0	BcLin
UBAC2	0	BcLin
UBASH3A	0	BcLin
ZNF831	0	BcLin
GPSM1	0	BcLin
HHAT	0	BcLin
IL12RB2	0	BcLin
AC008906.1	0	BcLin
EYS	0	BcLin
KIFAP3	0	BcLin
TMEM87B	0	BcLin
AF121898.1	0	BcLin
ERAP1	-0.00732601	BcLin
FNDC3A	-0.00915751	BcLin
EMSY	-0.00915751	BcLin
B3GALT6	-0.010989	BcLin
CD6	-0.010989	BcLin
GNA12	-0.010989	BcLin
IFIH1	-0.010989	BcLin
IL10	-0.010989	BcLin
LRRK2	-0.010989	BcLin
PSMA6	-0.010989	BcLin
PTPRK	-0.010989	BcLin
TMCO4	-0.010989	BcLin
TYK2	-0.010989	BcLin
POT1	-0.010989	BcLin
PTTG1IP	-0.021978	BcLin
AC116366.3	-0.021978	BcLin
FCGR2A	-0.021978	BcLin
JAK2	-0.021978	BcLin
THADA	-0.021978	BcLin
TTC33	-0.021978	BcLin
IL23R	-0.0238095	BcLin
KIF21B	-0.0238095	BcLin
LTBR	-0.0238095	BcLin
PCSK5	-0.0238095	BcLin
AHR	-0.0238095	BcLin
ACTA2	-0.0238095	BcLin
ATG16L1	-0.0238095	BcLin
MAPK3	-0.0238095	BcLin
NKD1	-0.0238095	BcLin
NR5A2	-0.0238095	BcLin
SLC9A8	-0.0238095	BcLin
TNFRSF1A	-0.0238095	BcLin
EOMES	-0.0238095	BcLin
IL7R	-0.0238095	BcLin
CLCN7	-0.0238095	BcLin
IFNGR2	-0.029304	BcLin
COMMD7	-0.0311355	BcLin
PPP2R3C	-0.0311355	BcLin
ATXN2	-0.032967	BcLin
IL2RA	-0.0347985	BcLin
ANTXR2	-0.0347985	BcLin
FAM118A	-0.0347985	BcLin
TBC1D5	-0.0347985	BcLin
ERAP2	-0.0421245	BcLin
FAS	-0.0457875	BcLin
BACH2	-0.047619	BcLin
KSR1	-0.047619	BcLin
NOTCH1	-0.047619	BcLin
TSPAN14	-0.047619	BcLin
ZBTB40	-0.047619	BcLin
HLA-DQA2	-0.047619	BcLin
CD40	-0.0494505	BcLin
RASGRP1	-0.0549451	BcLin
IRF5	-0.0586081	BcLin
NFATC1	-0.0586081	BcLin
PPP5C	-0.0586081	BcLin
CMC1	-0.0622711	BcLin
LPXN	-0.0641026	BcLin
LITAF	-0.0659341	BcLin
NPEPPS	-0.0659341	BcLin
DLD	-0.0695971	BcLin
RMI2	-0.0714286	BcLin
JAZF1	-0.0824176	BcLin
CDC37	-0.0860806	BcLin
ITGAL	-0.0934066	BcLin
USP8	-0.0989011	BcLin
NDFIP1	-0.104396	BcLin
CREM	-0.106227	BcLin
FOS	-0.106227	BcLin
LSM14A	-0.106227	BcLin
PTPN2	-0.10989	BcLin
ADAM28	-0.152015	BcLin
PRKCB	-0.153846	BcLin
SNN	-0.166667	BcLin
HHEX	-0.210623	BcLin
TNFRSF14	-0.234432	BcLin
IKZF1	-0.291209	BcLin
SP140	-0.362637	BcLin
BANK1	-1.24725	BcLin
CORO1A	-1.58059	BcLin
HLA-B	-3.64652	BcLin

## Sheet: 1h
Supplementary File 1h: AqH Cytokine level in Figure 4
	Endophthalmitis (Control)			Anterior uveitis (AU); HLA-B27-			Acute anterior uveitis (AAU); HLA-B27+
	Patient 1	Patient 2	Patient 3	Patient 1	Patient 3	Patient 4	Patient 1	Patient 2	Patient 3	Patient 4
IL-6	2007.2	39408.4	1260.9	727.8	157.2	1380.5	9809.6	8357	7633.3	6913.7
IL-1RA	7142.9	8390.7	5169.9	492.5	537.9	910.1	4485.2	8174.1	14398.2	578.1
IFN-γ	0	5.4	0	0	0	0	38	54.2	81.8	47.7
IL-17A	0	8.1	10,6	8.5	0	1.8	4.3	21.8	143.7	8.6
IL-18	0	16.9	2.2	0	0	0	11.7	28.3	53.6	15.8
IL-10	62.6	66.1	35.3	0	0	5.3	0	37.6	26.8	0
IL-5	0	16.1	14.4	0	0	7.5	16.7	12.8	5.4	12.6
IL-2	4.8	10	7.1	2.7	3.3	7.1	9.4	9.2	11.2	8.4
IL-22	0	7.9	0	0	0	0	17.7	6.5	2.5	6.7
TNF-α	2.1	5.1	10.4	0	0	4.7	3.2	0	5.1	7.6
IL-1β	1.5	62	0.6	0	0	0	2.5	2.5	5.7	0.1
IL-7	3	4.4	2.5	0	3.1	0.3	2.8	4.1	0.9	1.5
IL-9	0	0	0	0	0	0	9.9	0	0	0
IFN-α	0	0.4	0	0	0	0	1.3	0	0	0
IL-21	0	0	0	0	0	0	1.1	0	0	0
IL-12p70	0	1.4	0	0	0	0	0.2	0	0.1	0.2
GM-CSF	0	2.1	0	0	0	0	0	0	0	0
IL-15	0	0	0	0	0	0	0	0	0	0.2
IL-31	0	0.2	0	0	0	0	0	0	0	0.6
IL-13	0	0	0	0	0	0	0	0	0	0
IL-1α	0	0	0	0	0	0	0	0	0	0
IL-27	0	0	0	0	0	0	0	0	0	0
IL-23	0	0	0	0	0	0	0	0	0	0
IL-4	0	0	0	0	0	0	0	0	0	0
TNF-β	0	0	0	0	0	0	0	0	0	0

## Sheet: 1i
Supplementary File 1i: Serum cytokine level in Figure 4-figure supplement 2
Cytokine in pg/ml	Anterior uveitis (AU); HLA-B27- (N=5)	Acute anterior uveitis (AAU); HLA-B27+ (N=6)	p-value
Cytokine in pg/ml			P-value
IL-6	4.4±4.4	0±0	0.273
IL-1RA	314±86.9	746.4±141.0	*0.045
IFN-γ	8.7±3.6	29.6±5.8	*0.018
IL-17A	0±0	0.3±0.3	0.361
IL-18	1.4±1.4	14.6±8.4	0.205
IL-10	0±0	0±0	1000
IL-5	0±0	111±110	0.176
IL-2	0.5±0.5	0.1±0.1	0.787
IL-22	21.2±12.4	88.3±61.4	0.566
TNF-α	2.7±1.3	4.8±4.2	0.565
IL-1β	0±0	0±0	1000
IL-7	2.0±0.5	4.7±1.8	0.273
IL-9	0±0	0±0	1000
IFN-α	0.3±0.2	0.9±0.5	0.371
IL-21	0±0	1.9±1.9	0.361
IL-12p70	0.3±0.3	0±0	0.104
GM-CSF	0±0	2.5±1.9	0.176
IL-15	0±0	1.3±0.9	0.176
IL-31	0±0	0±0	1000
IL-13	0±0	0±0	1000
IL-1α	0.3±0.2	0.5±0.5	0.560
IL-27	0±0	0±0	1000
IL-23	0±0	0±0	1000
IL-4	0±0	0±0	1000
TNF-β	0±0	0±0	1000
Results are displayed as MW±SEM; Mann-Whitney U- test; p≤0.05
